# Supplementary material
Source: PubMed Central journal article supplement (PMC4156511)
Supplement: NIHMS589916-supplement-Appendix.pdf [file NIHMS589916-supplement-Appendix.pdf]

# Appendix to A comparative risk assessment of burden of disease and injury attributable to 67 risk factors and risk factor clusters in 21 regions, 1990–2010: a systematic analysis for the Global Burden of Disease Study 2010

---

This appendix provides supplemental figures and more detailed results for deaths and disability-adjusted life years (DALYs) attributable to risk factors.

## Table of contents

|                                                                                                                                                                              |     |
|------------------------------------------------------------------------------------------------------------------------------------------------------------------------------|-----|
| Web figure 1: Burden of disease attributable to the 20 leading risk factors, expressed as the percent of regional DALYs, by region, both sexes combined, 1990 and 2010 ..... | 2   |
| Web figure 2: Risk factors ranked by attributable burden of disease .....                                                                                                    | 44  |
| Web table 1: Global deaths attributable to risk factors by age and sex in 2010 .....                                                                                         | 45  |
| Web table 2: Global deaths attributable to risk factors by age and sex in 1990 .....                                                                                         | 72  |
| Web table 3: Global DALYs (in thousands) attributable to risk factors by age and sex in 2010 .....                                                                           | 99  |
| Web table 4: Global DALYs (in thousands) attributable to risk factors by age and sex in 1990 .....                                                                           | 126 |

# Web Figure 1: Percent of High-income Asia Pacific DALYs, 1990

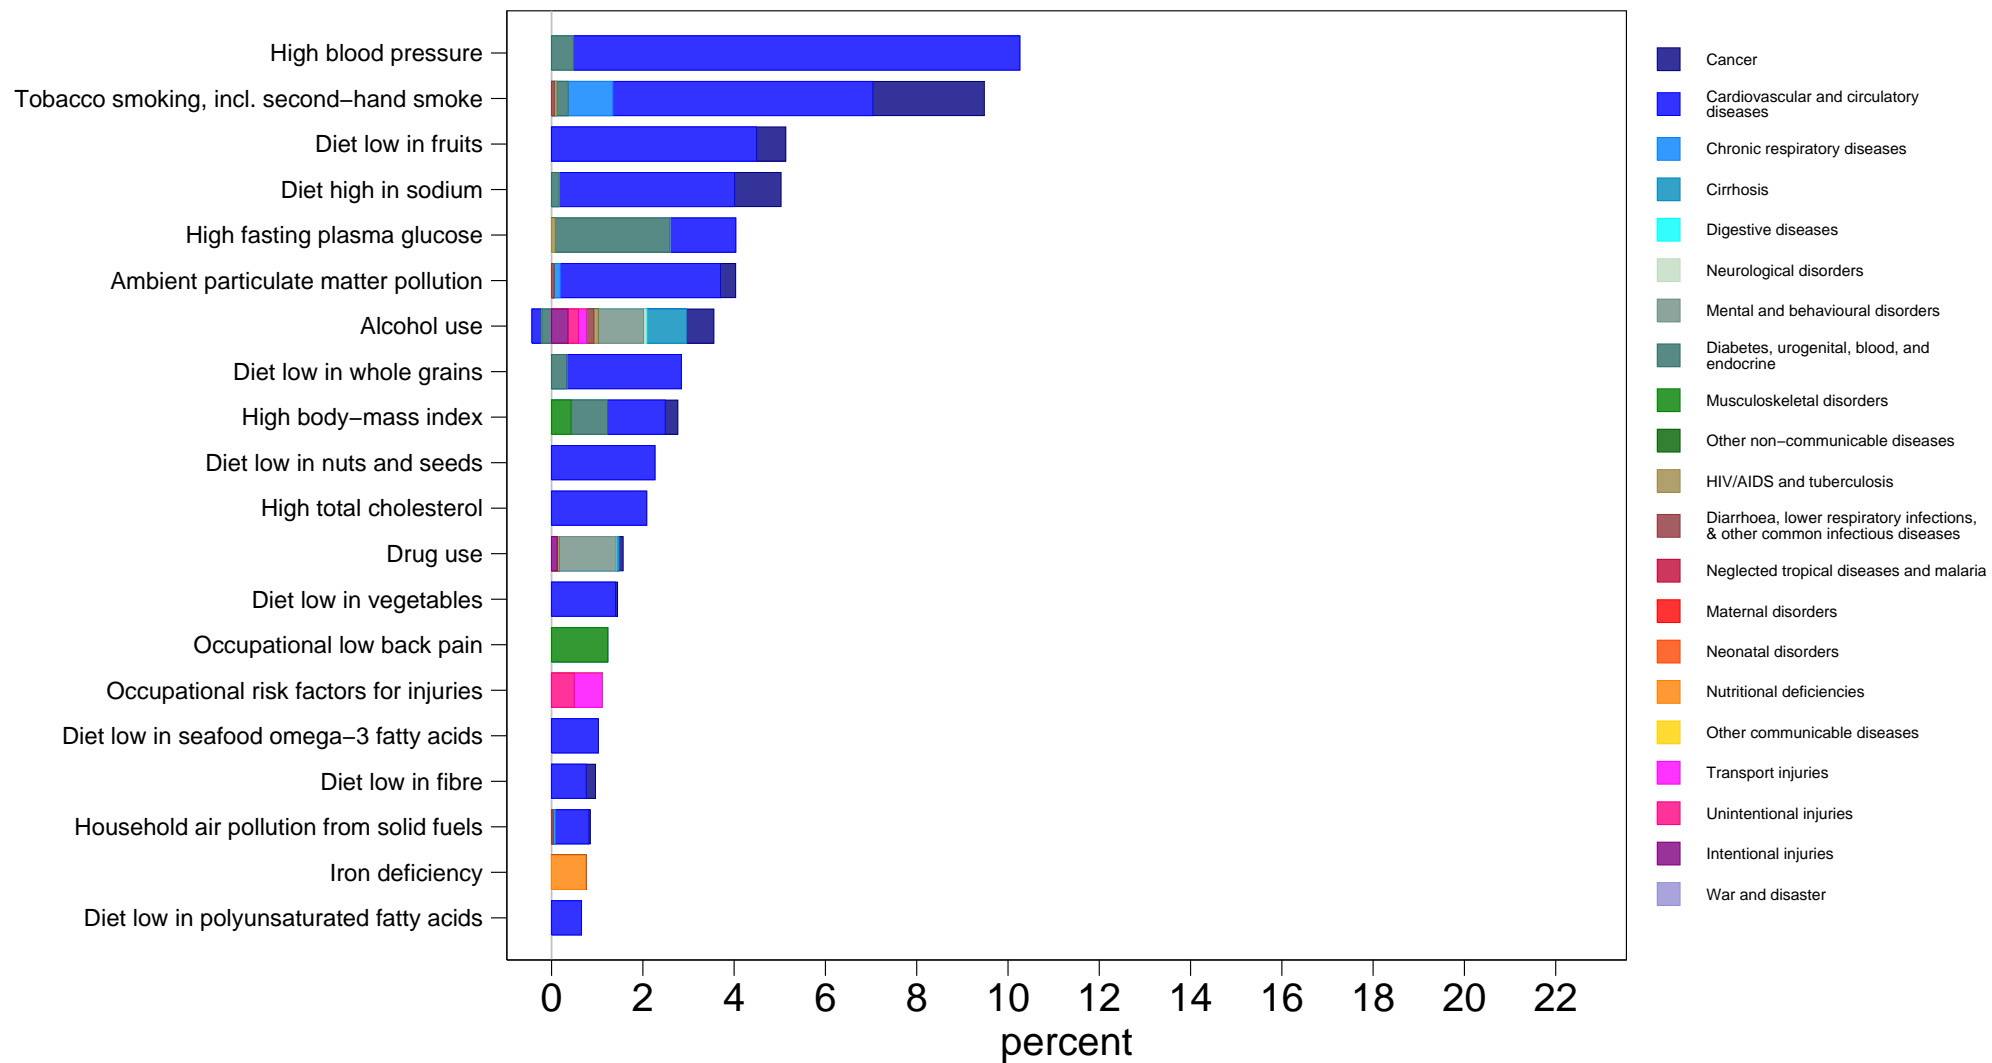

# Web Figure 1: Percent of High-income Asia Pacific DALYs, 2010

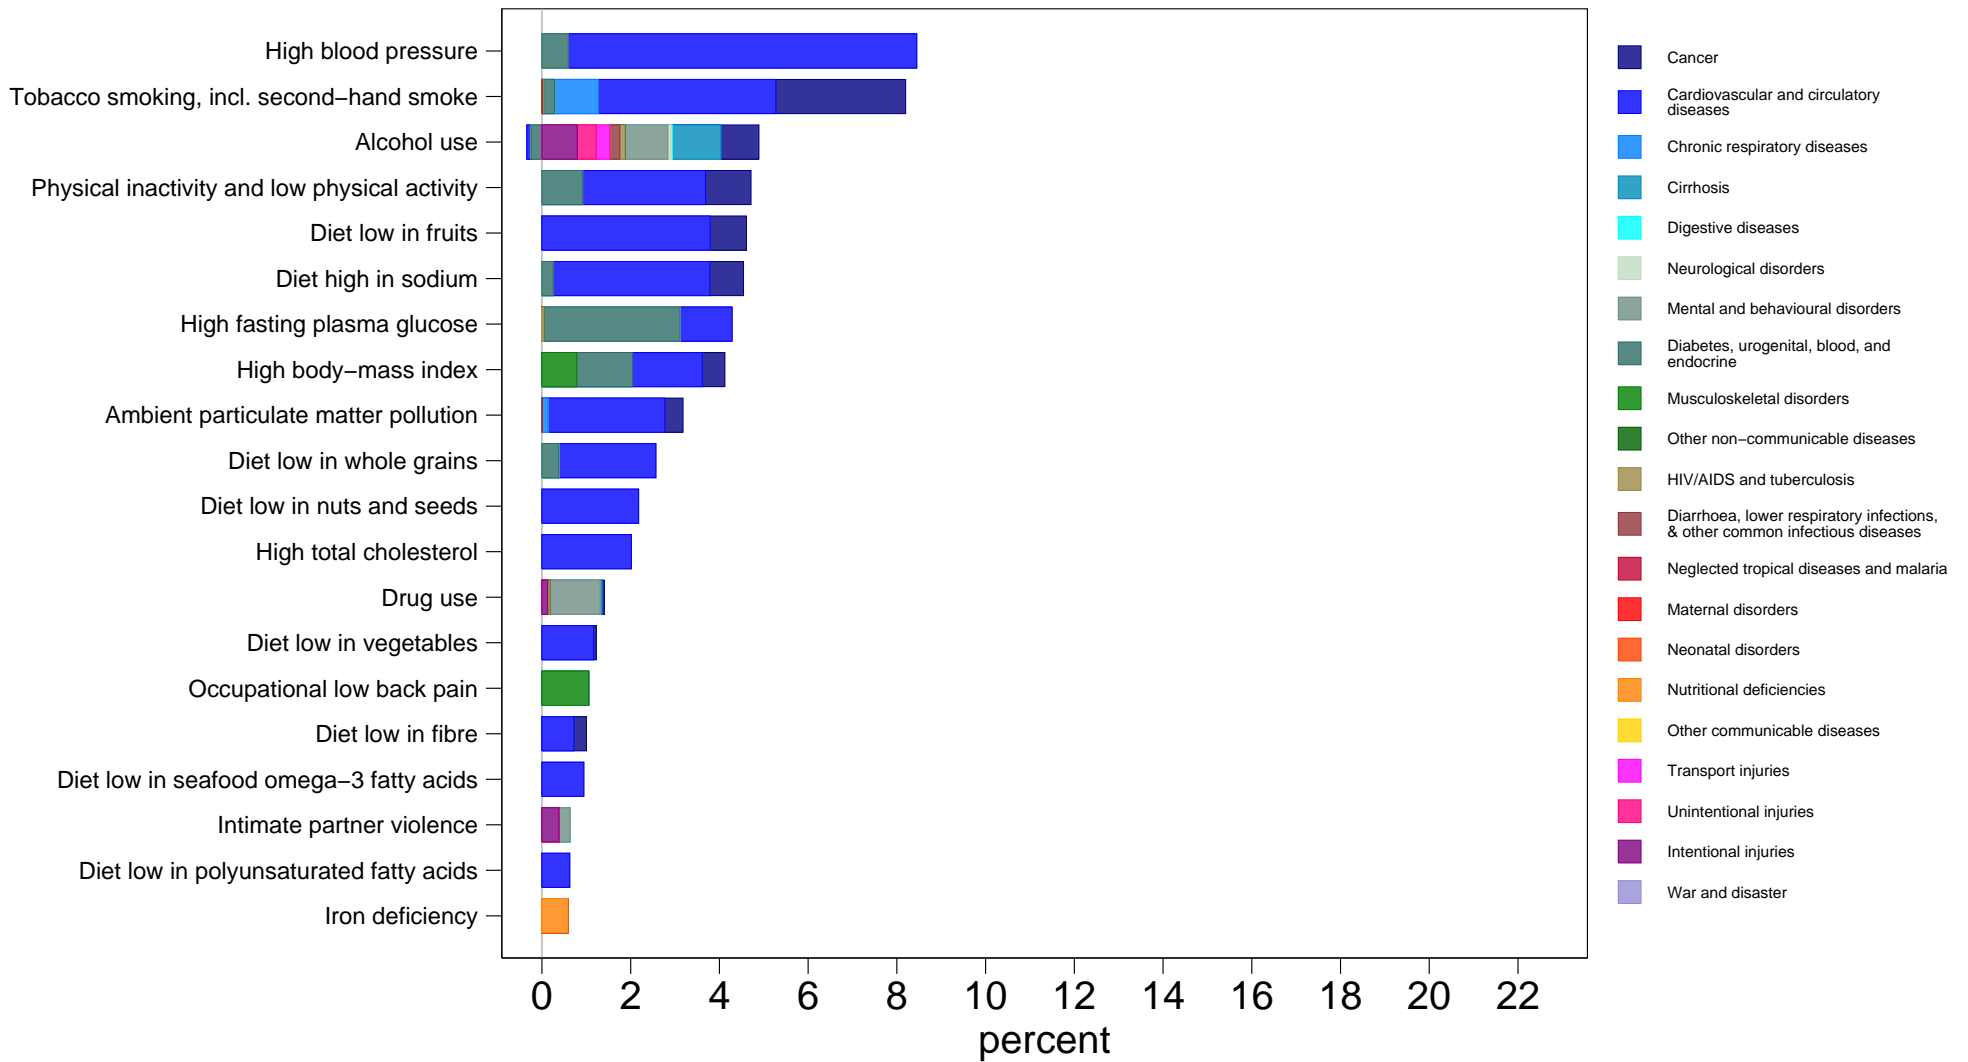

# Web Figure 1: Percent of Central Asia DALYs, 1990

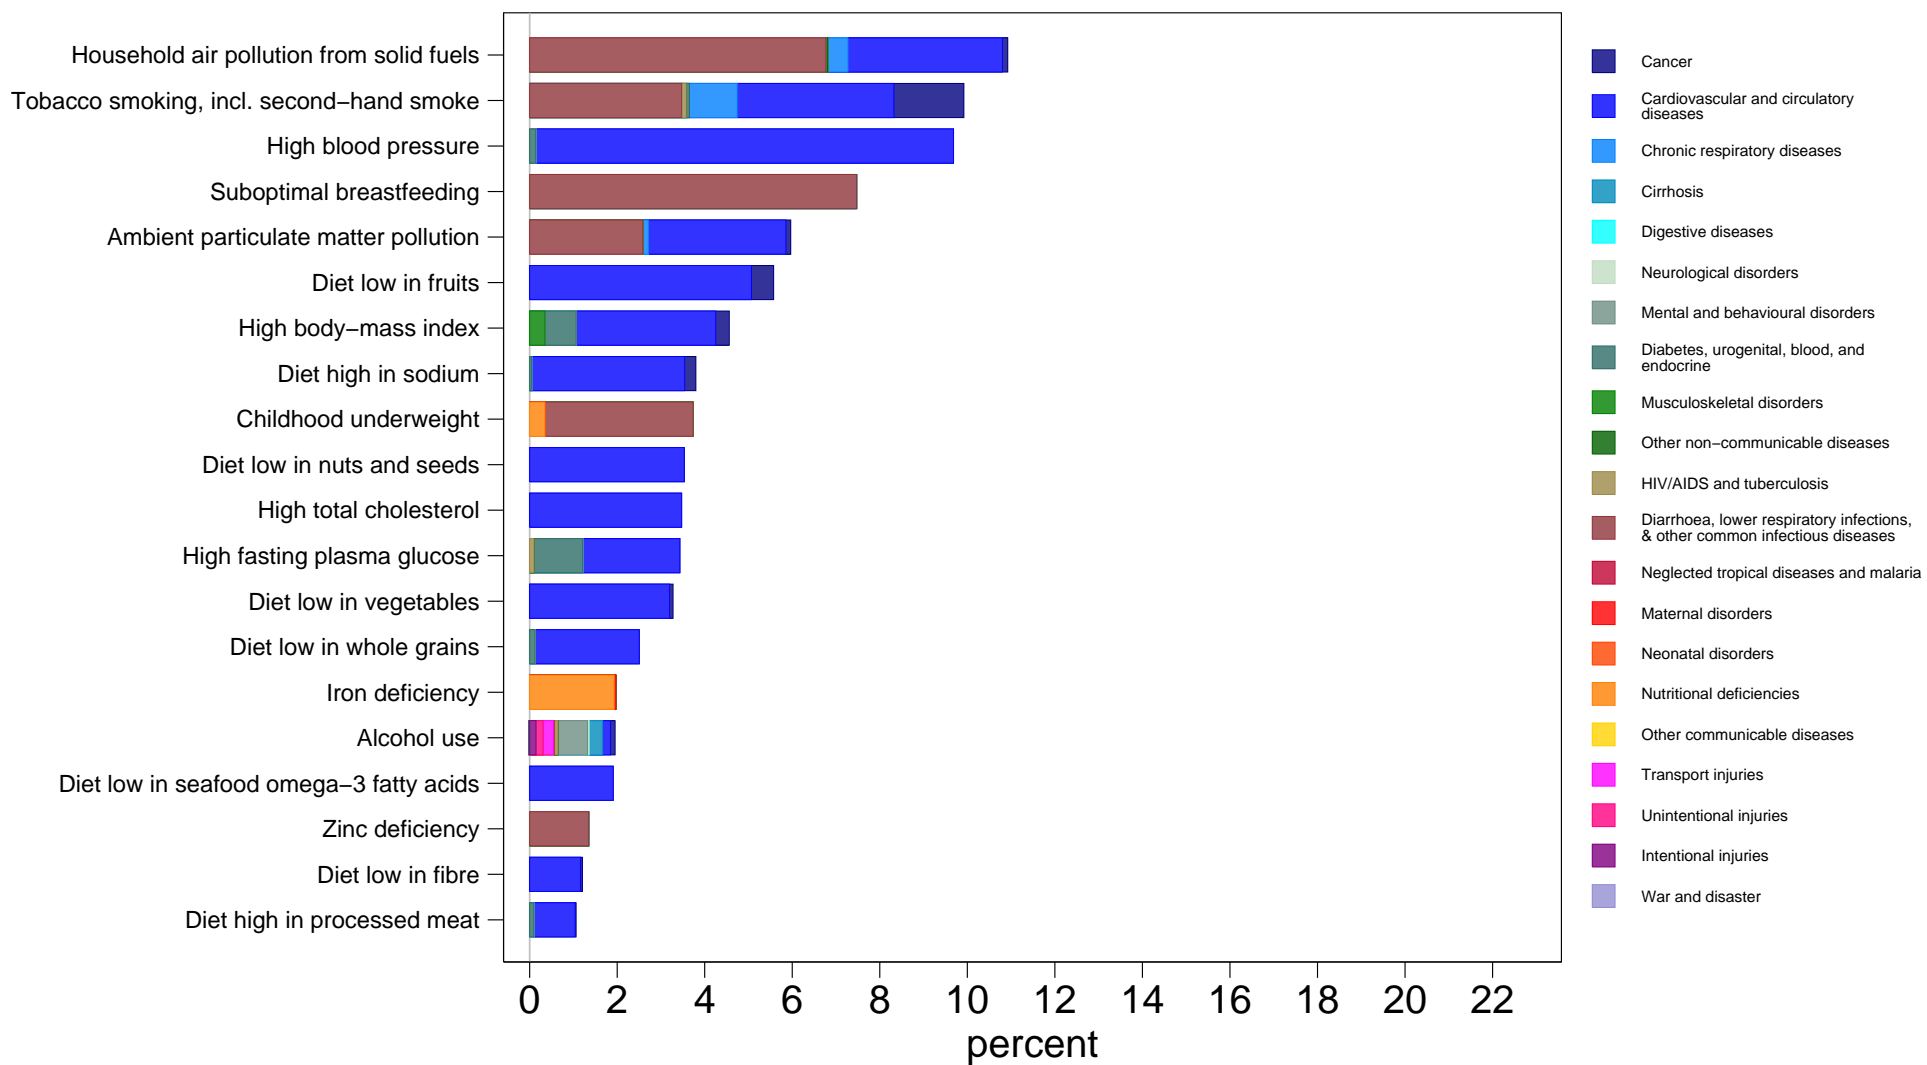

# Web Figure 1: Percent of Central Asia DALYs, 2010

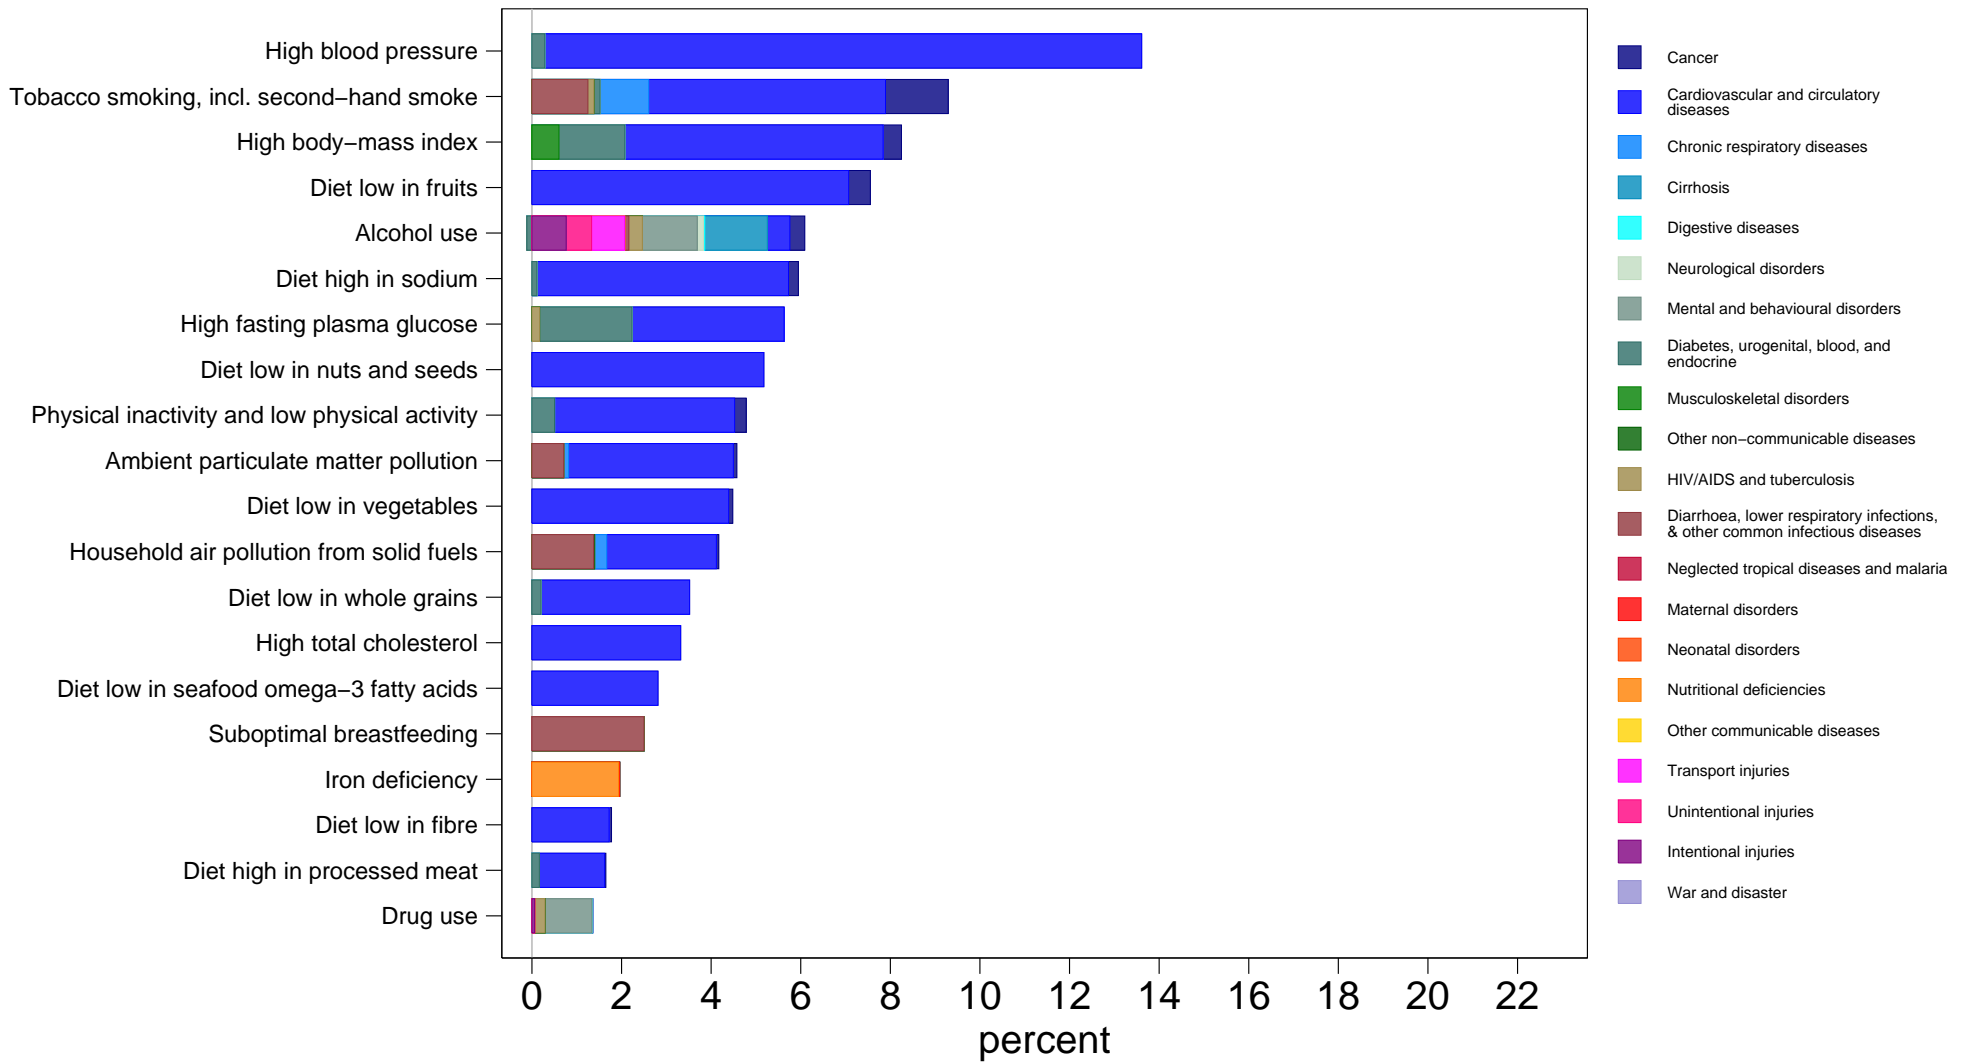

# Web Figure 1: Percent of East Asia DALYs, 1990

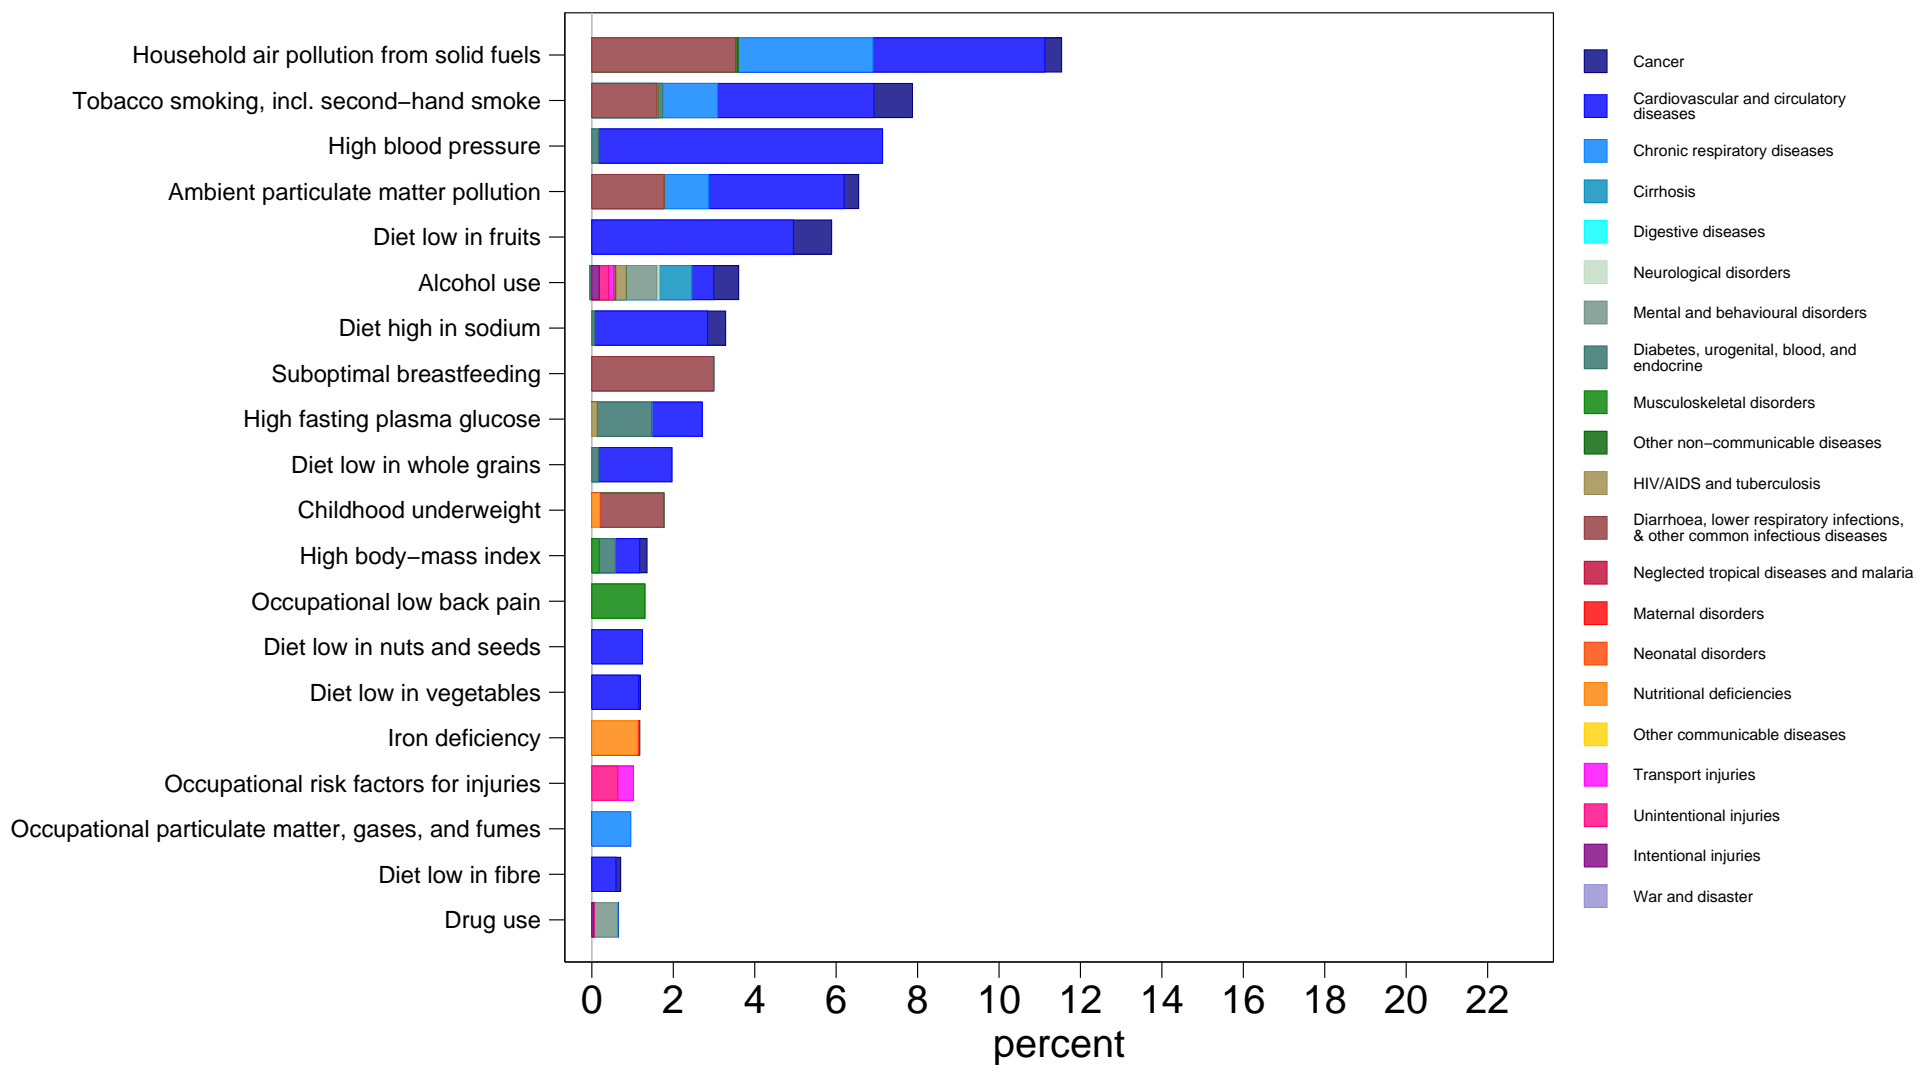

# Web Figure 1: Percent of East Asia DALYs, 2010

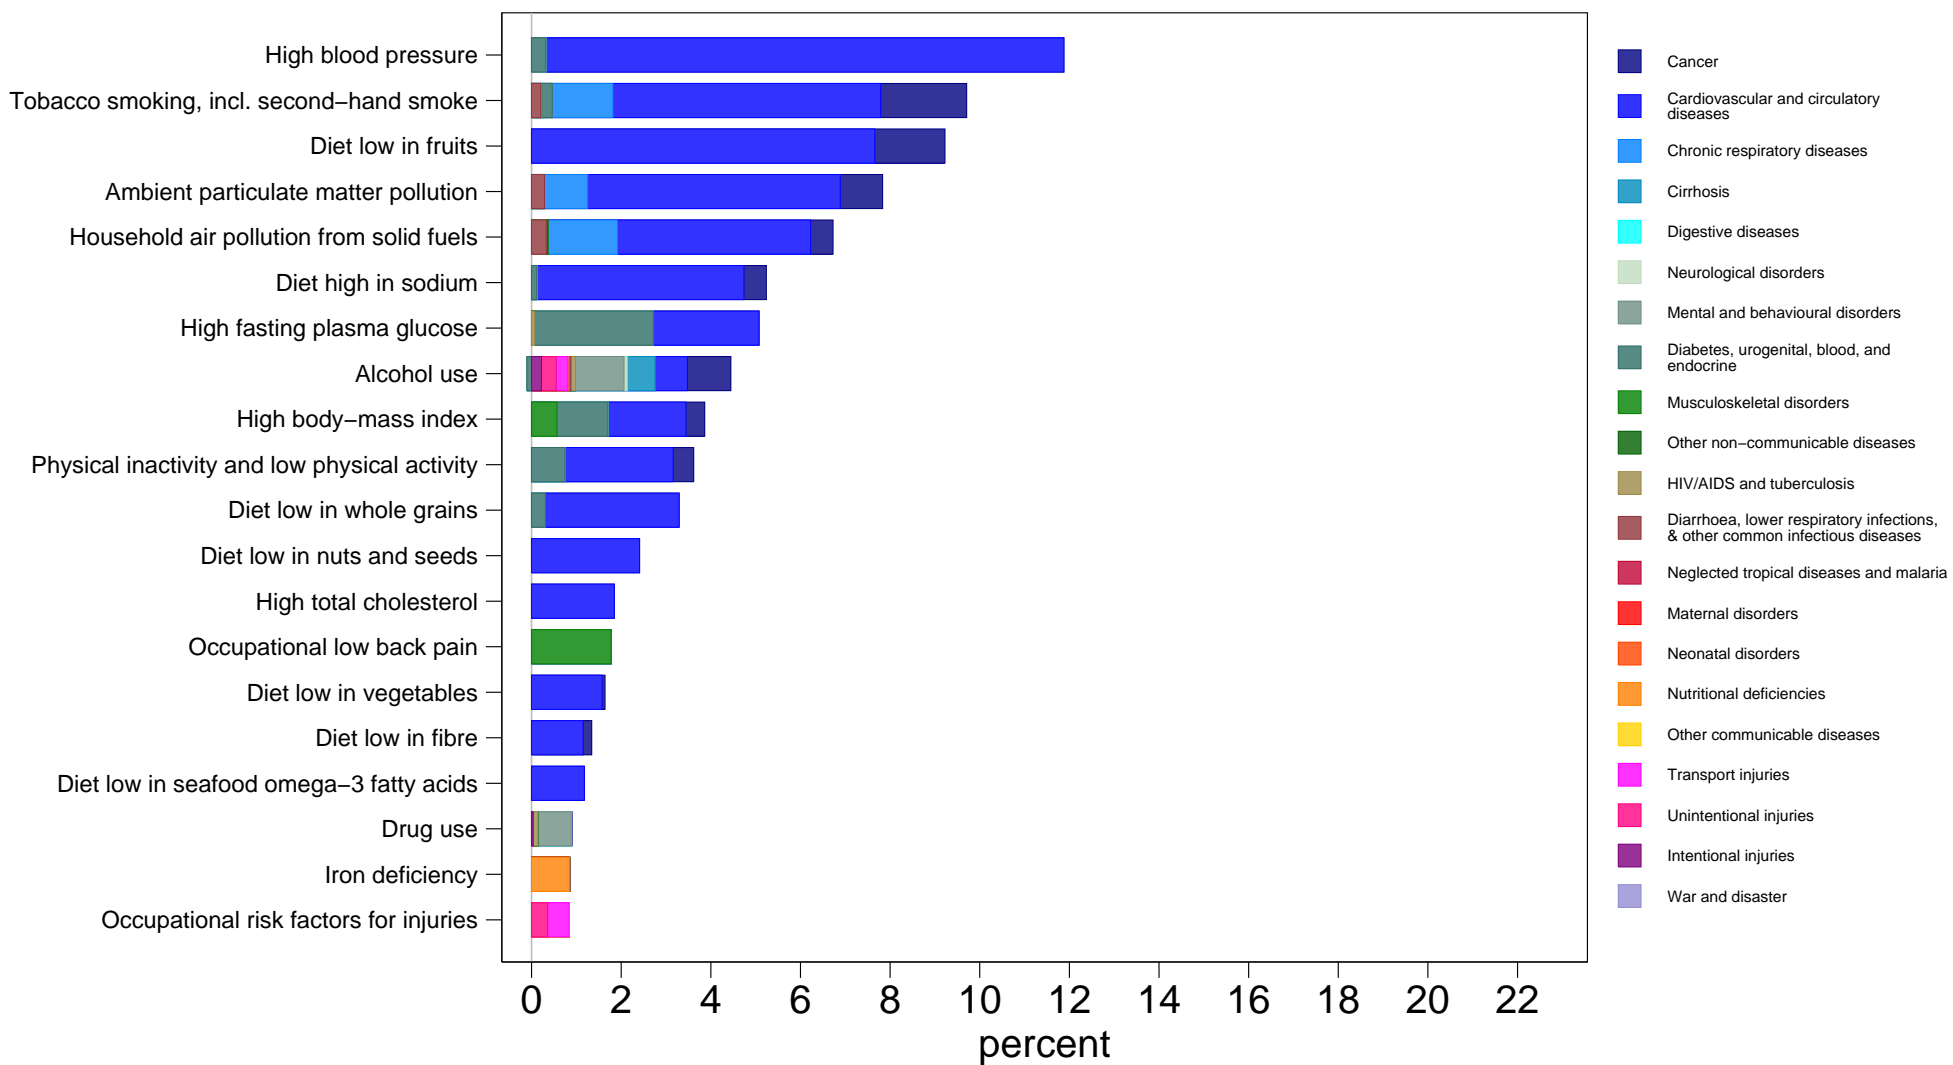

# Web Figure 1: Percent of South Asia DALYs, 1990

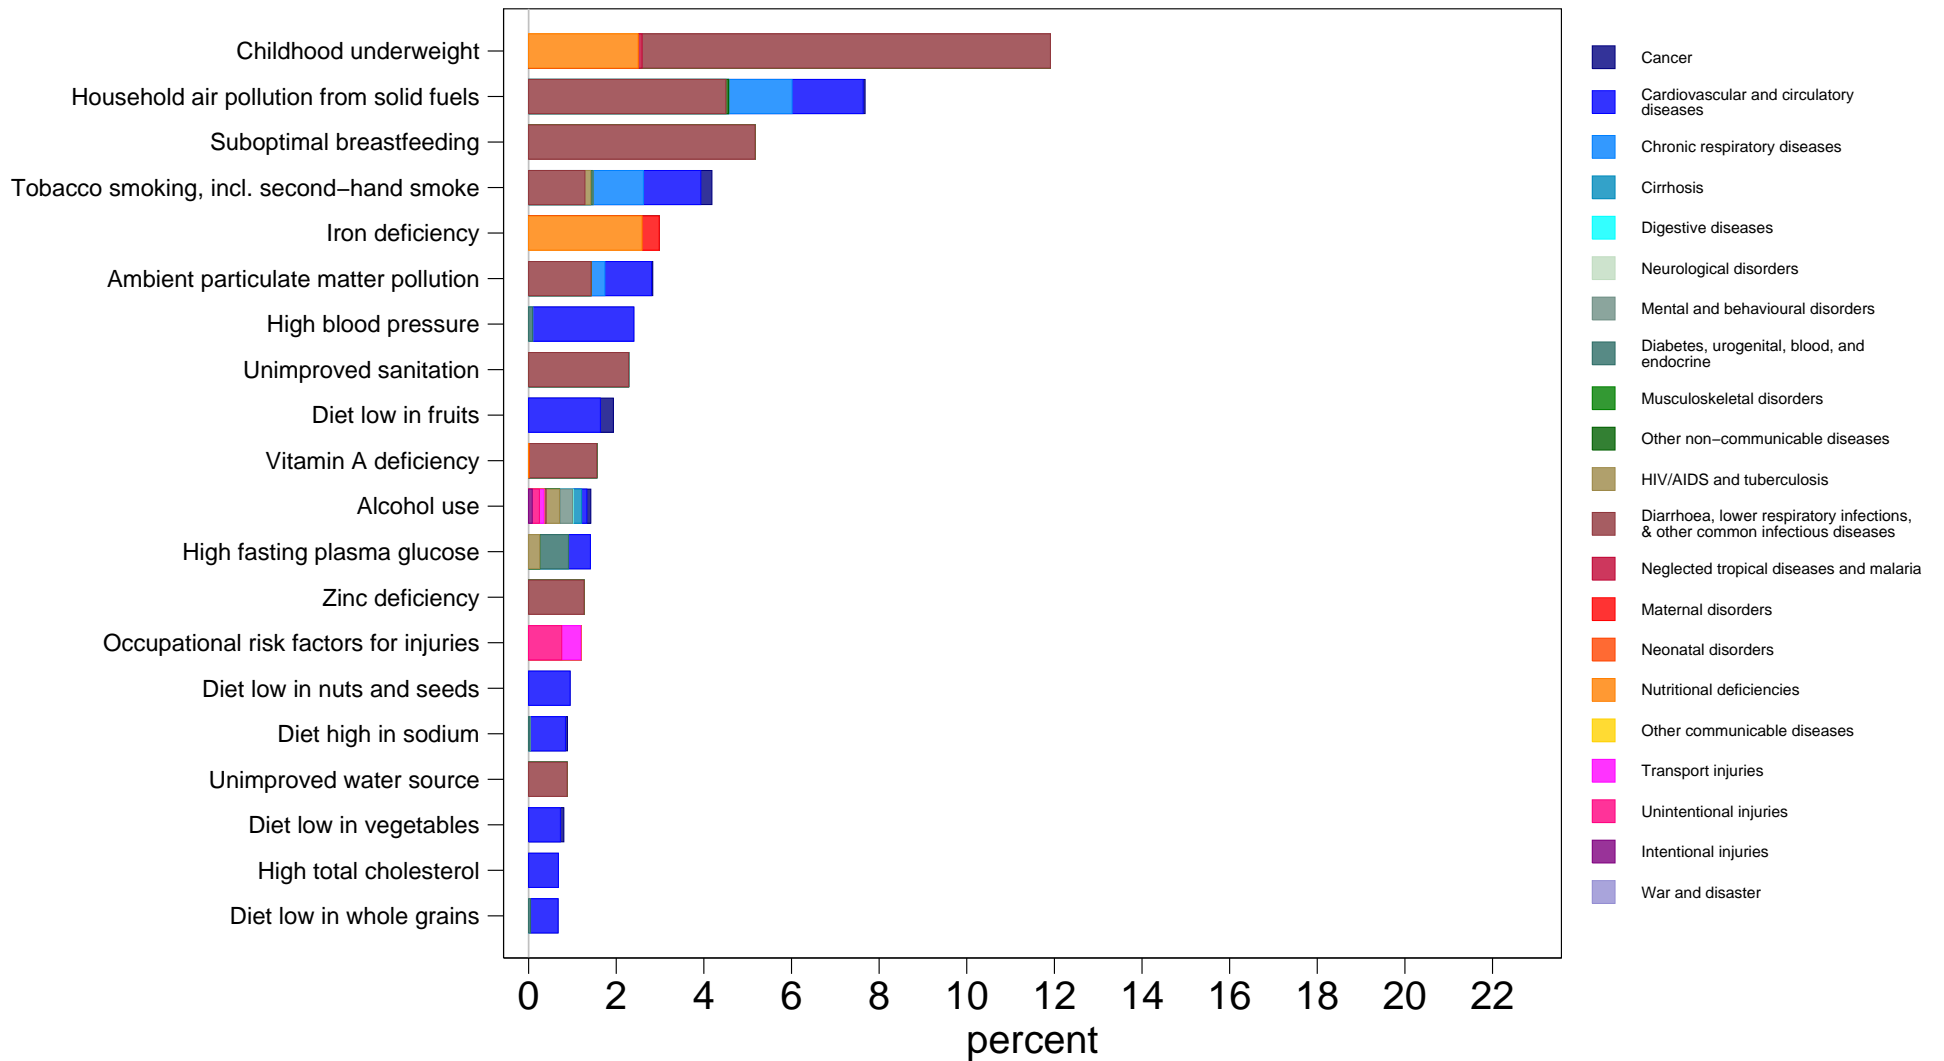



# Web Figure 1: Percent of South Asia DALYs, 2010

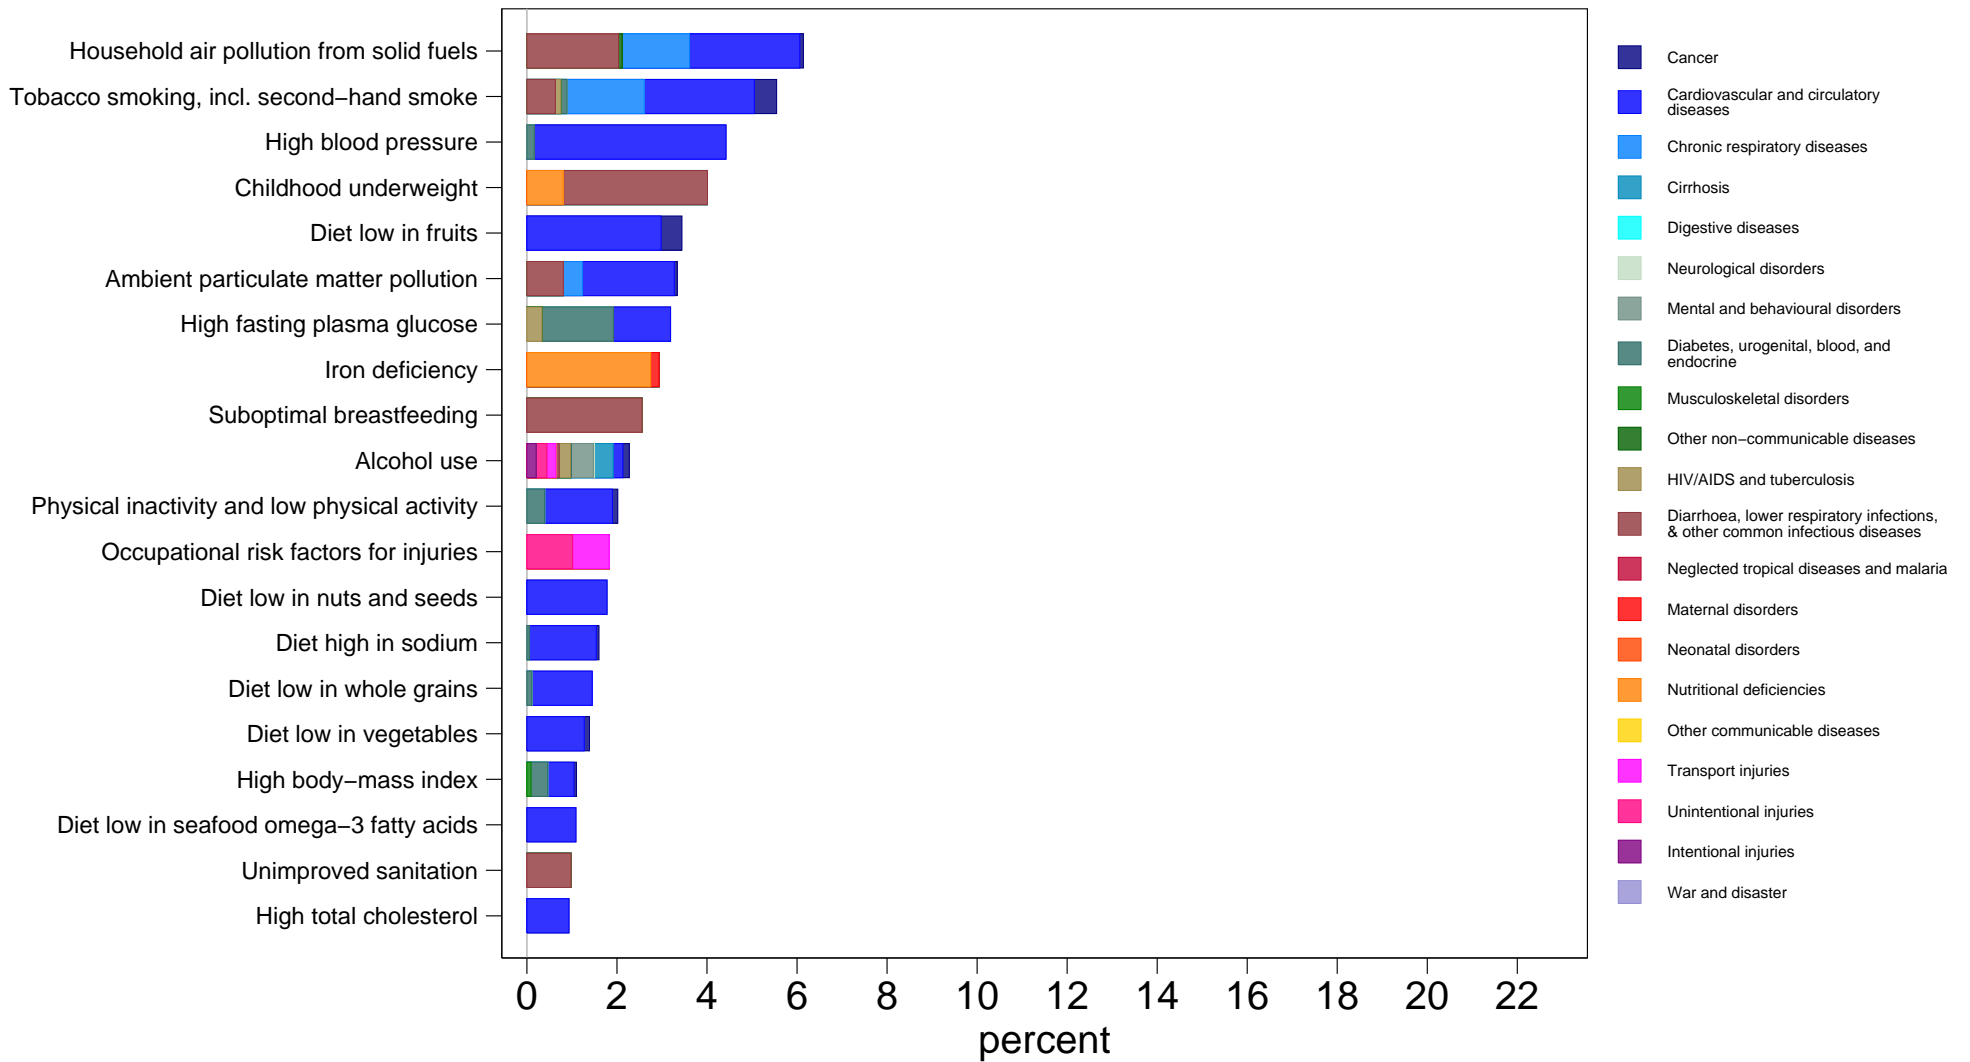

# Web Figure 1: Percent of Southeast Asia DALYs, 1990

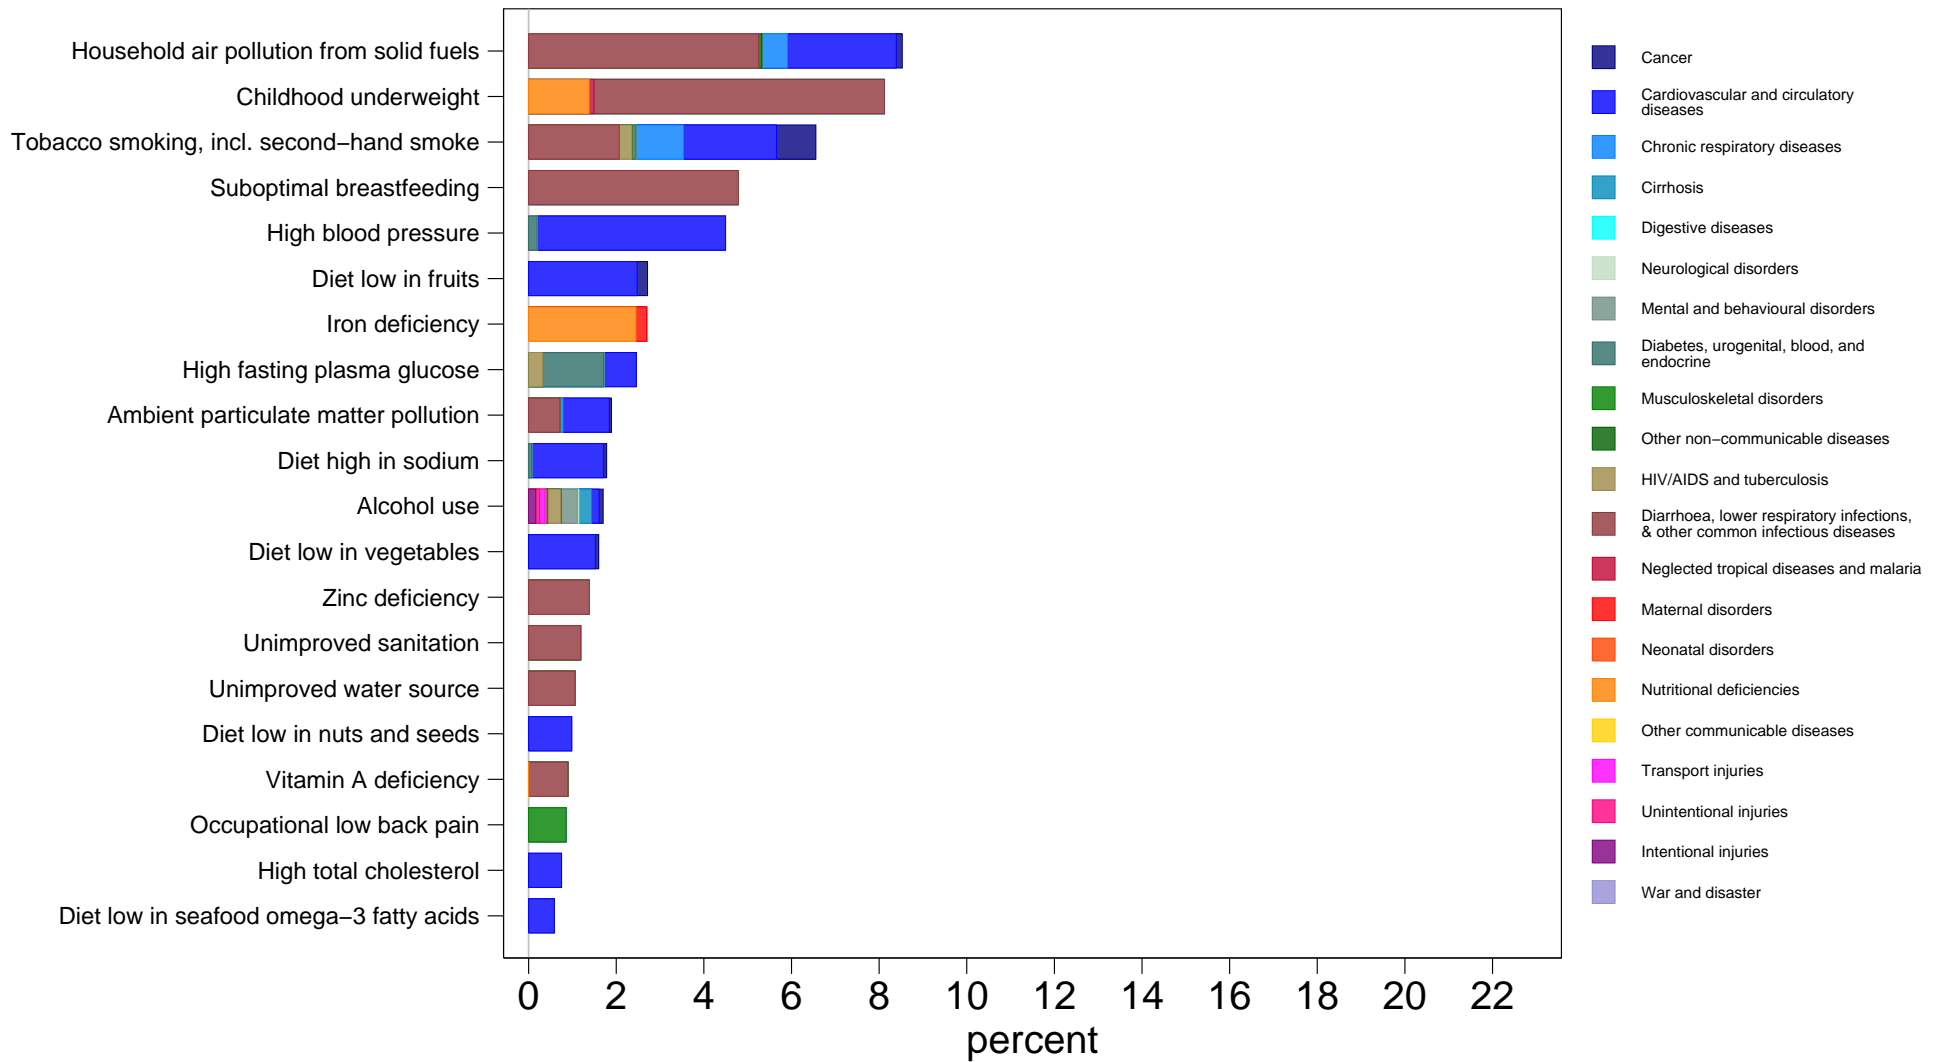

# Web Figure 1: Percent of Southeast Asia DALYs, 2010

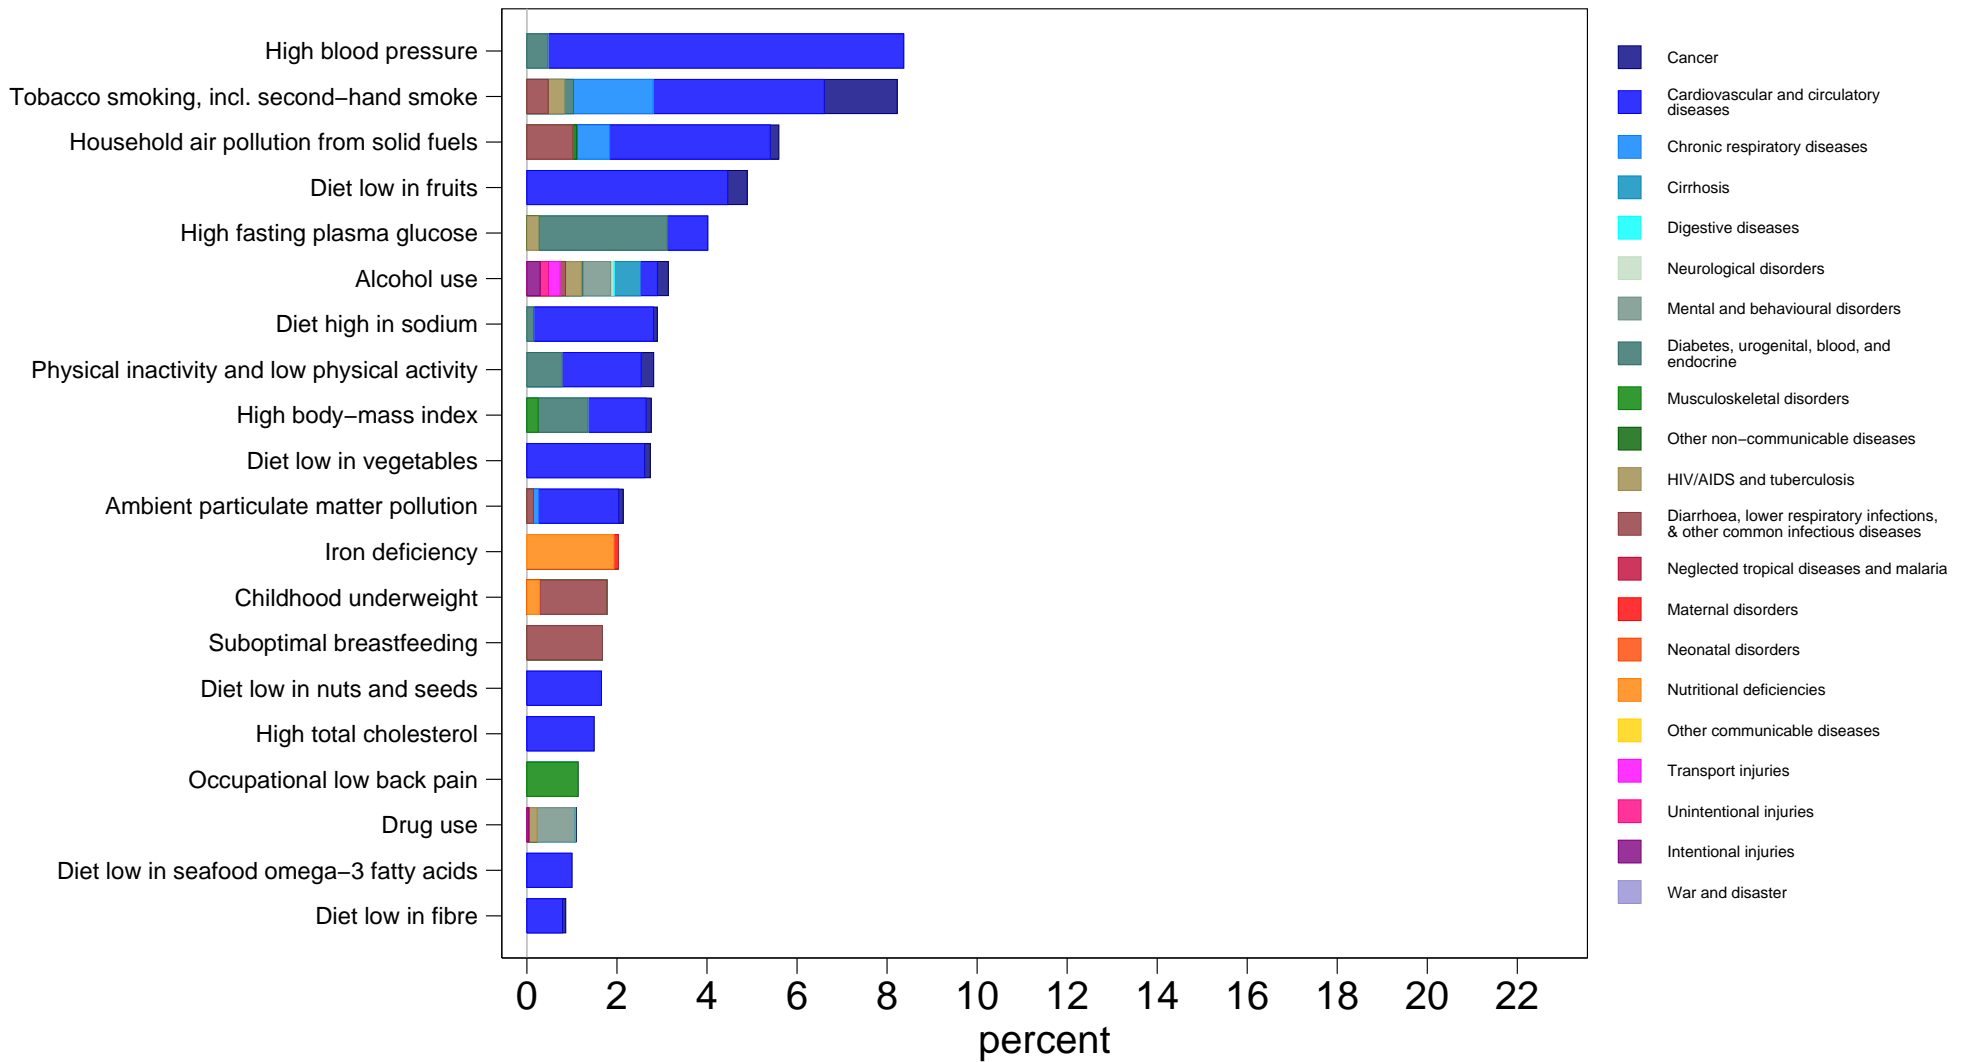

# Web Figure 1: Percent of Australasia DALYs, 1990

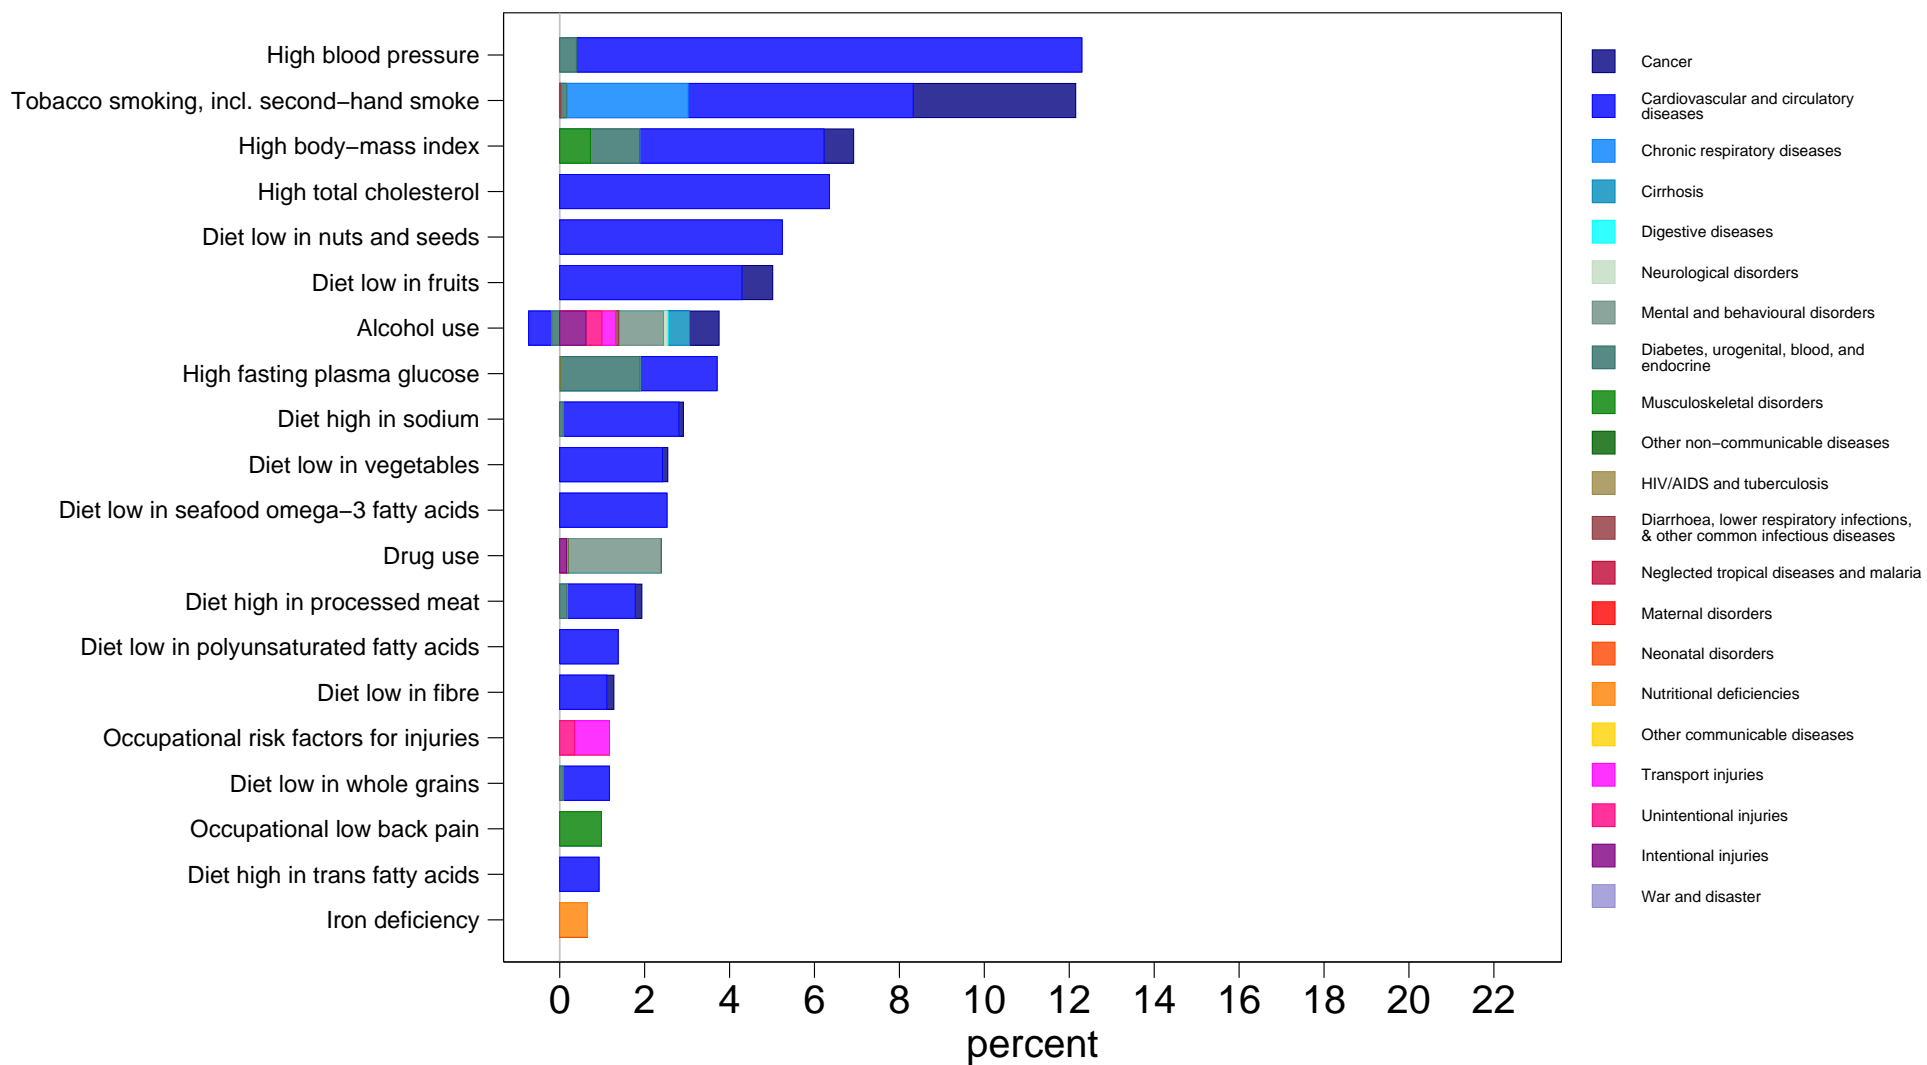

# Web Figure 1: Percent of Australasia DALYs, 2010

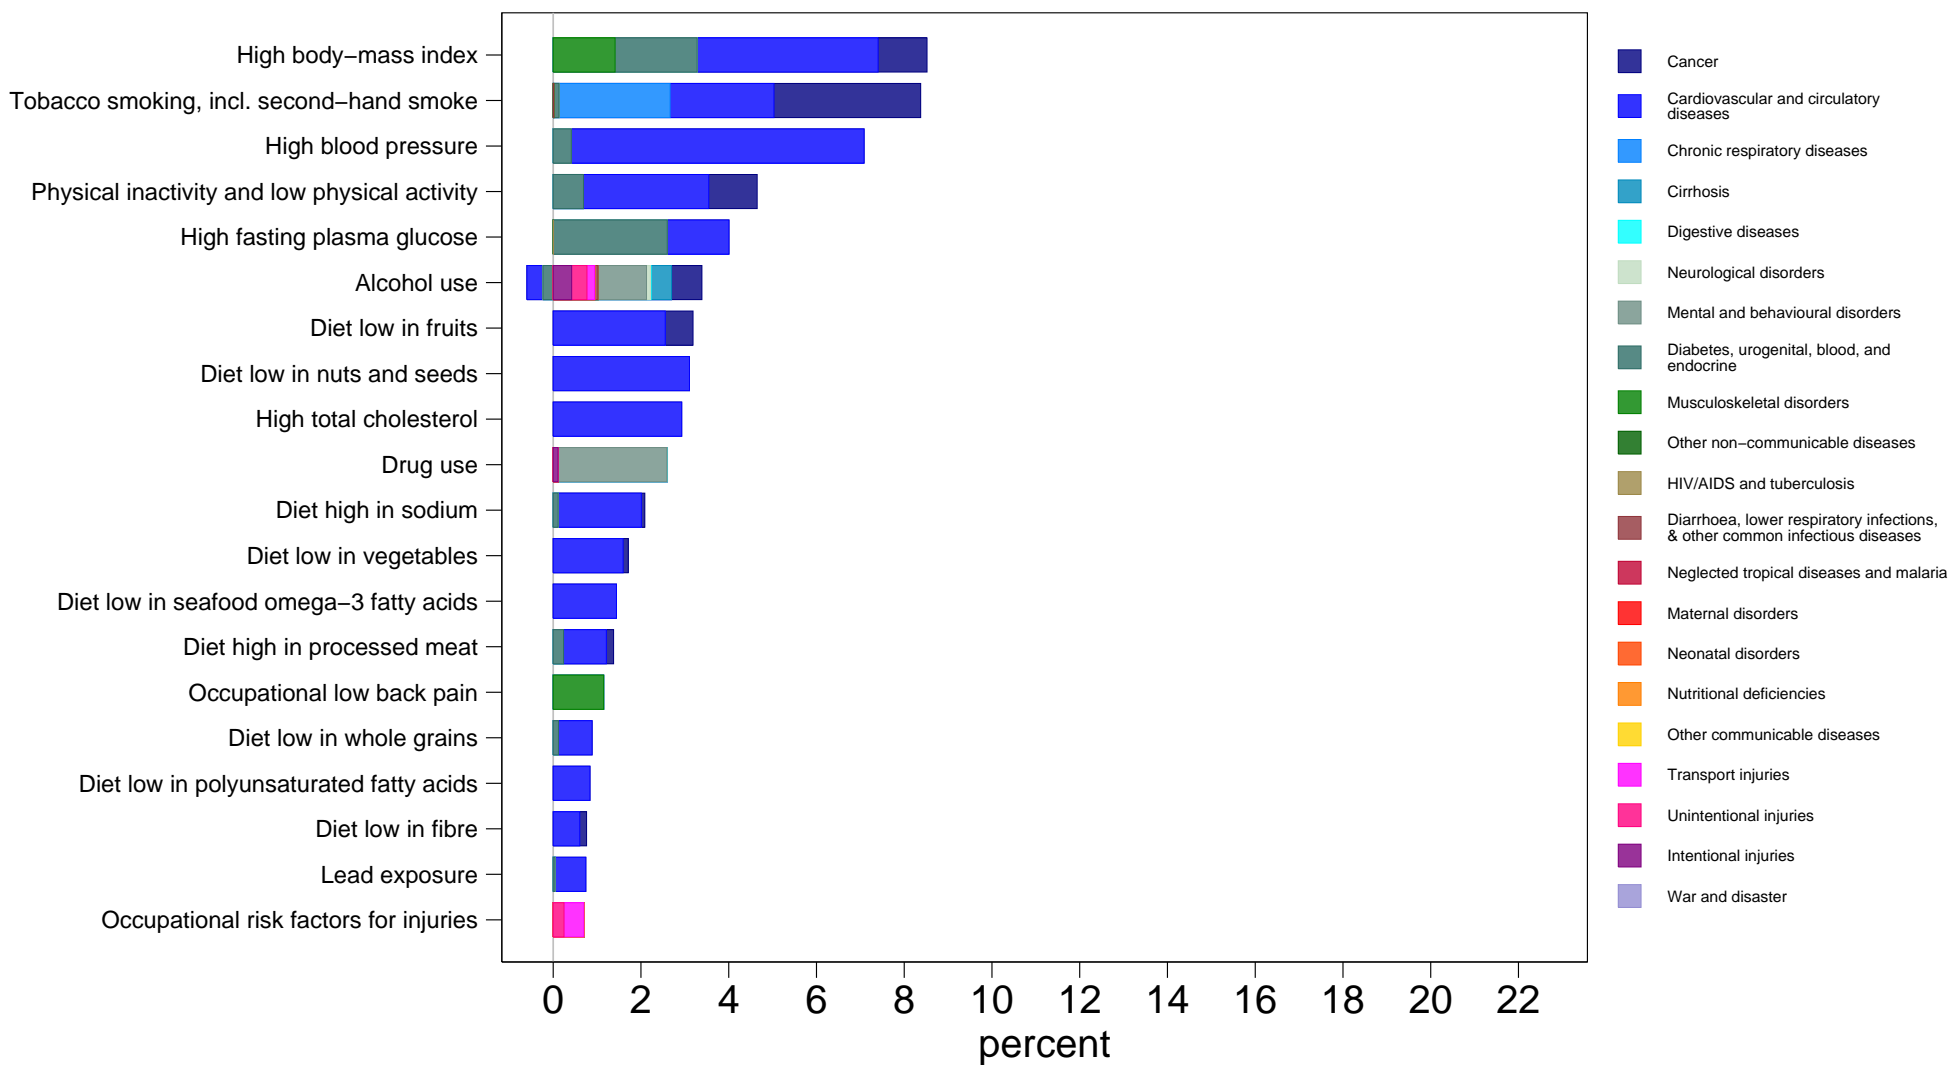

# Web Figure 1: Percent of Caribbean DALYs, 1990

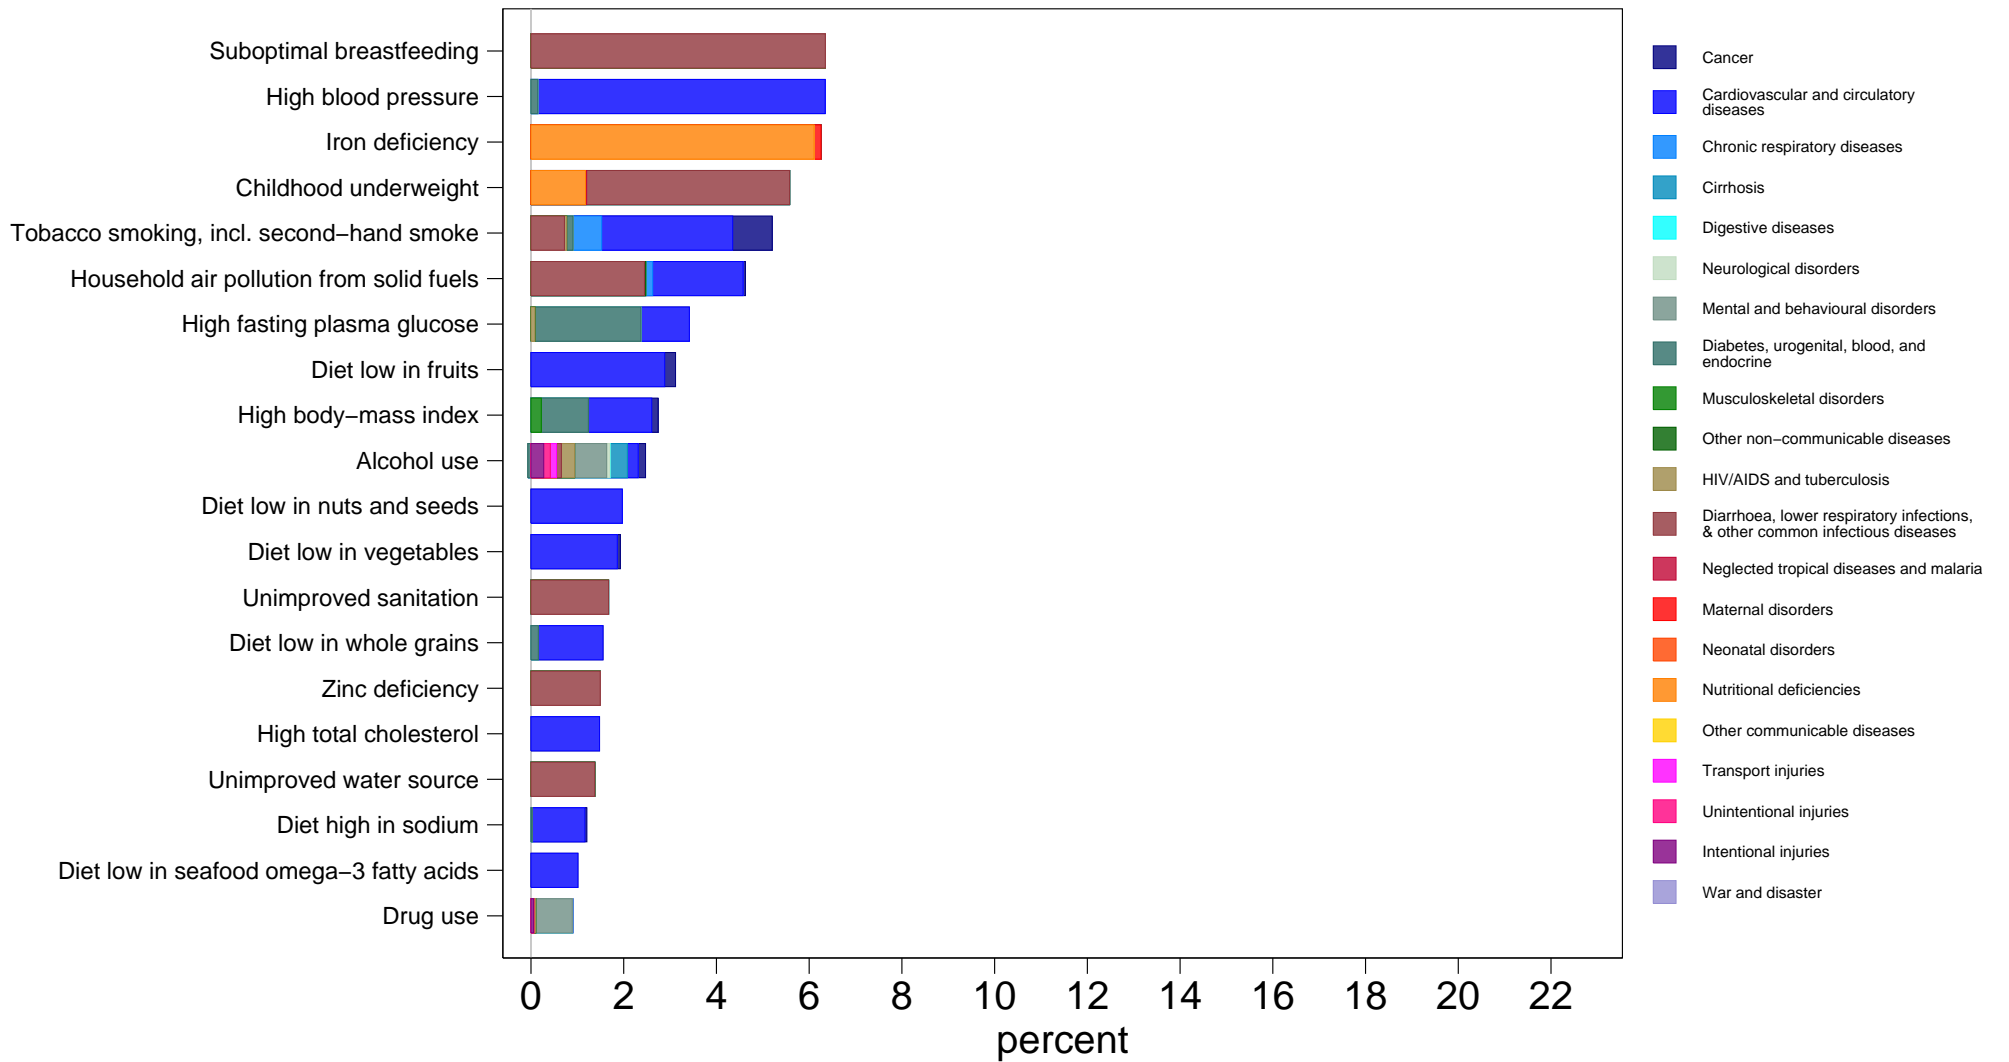

# Web Figure 1: Percent of Caribbean DALYs, 2010

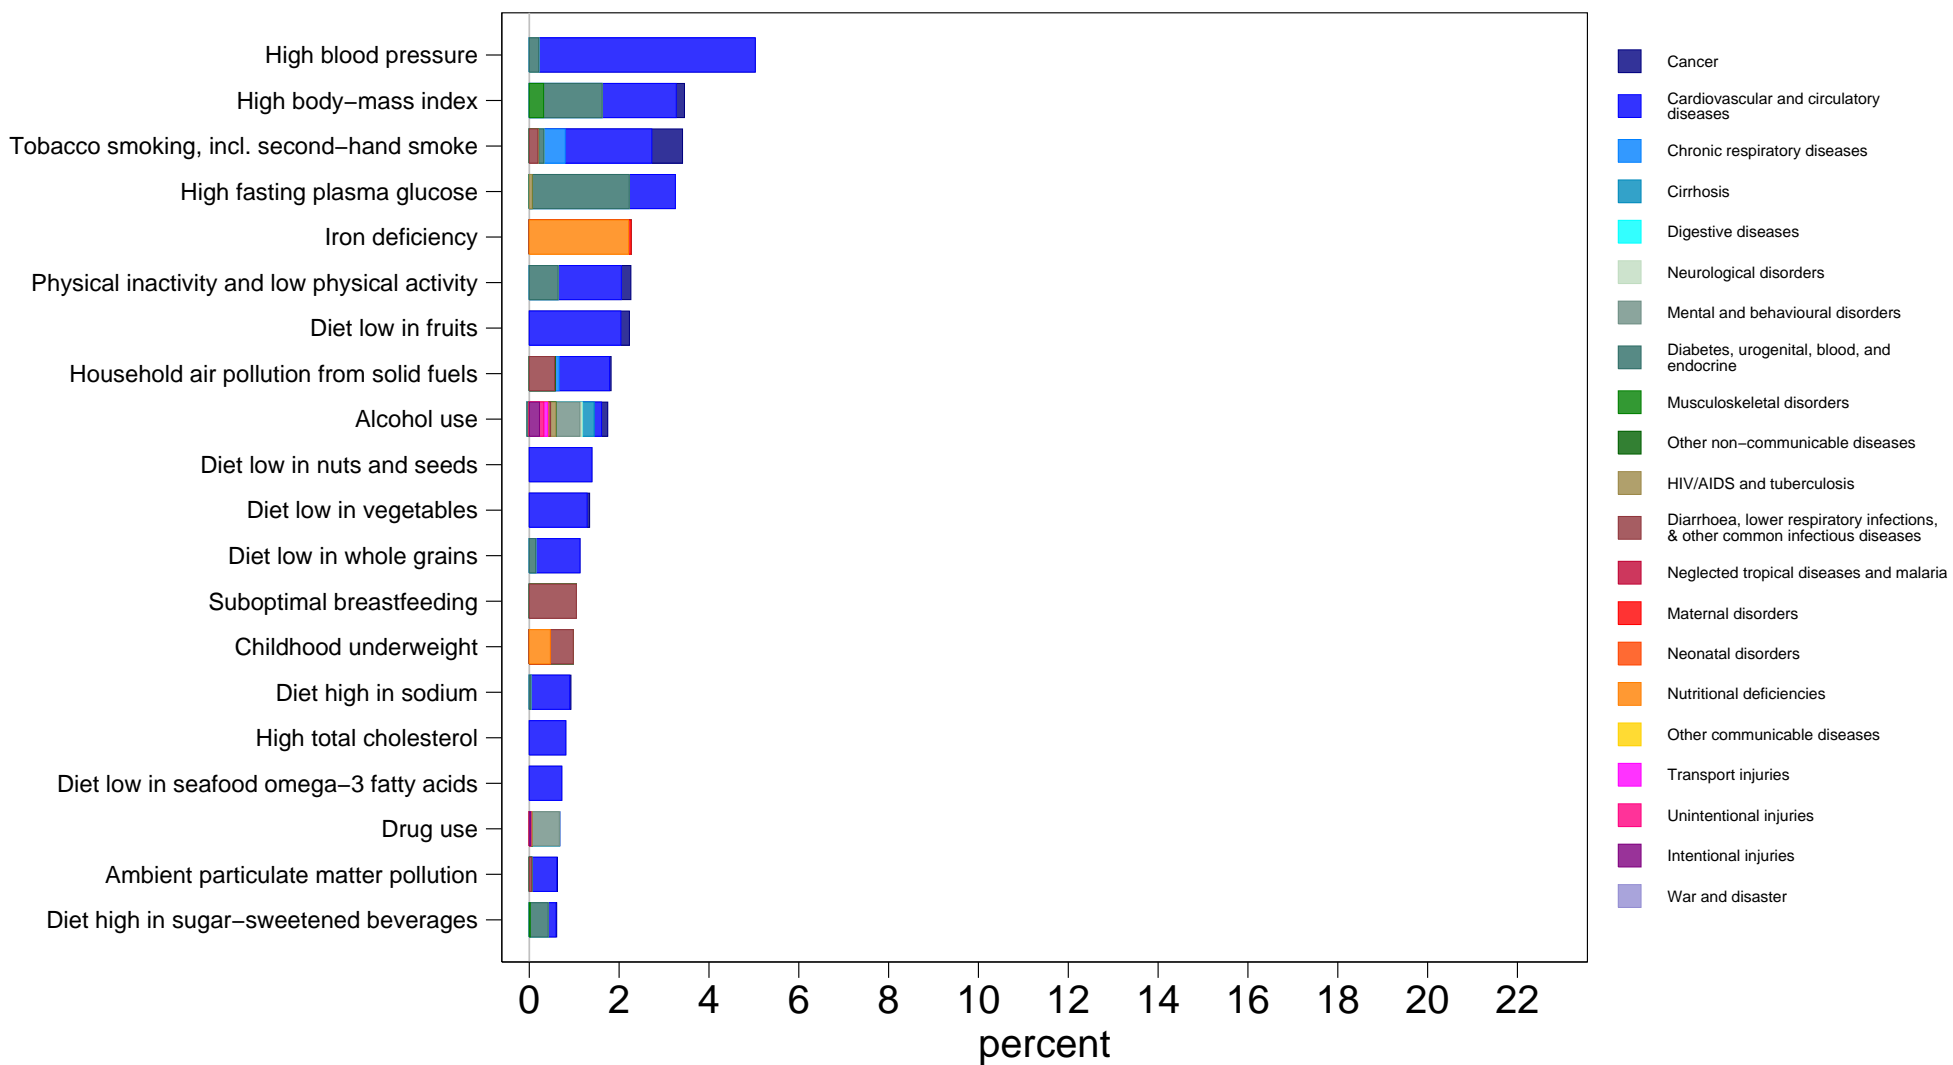

# Web Figure 1: Percent of Central Europe DALYs, 1990

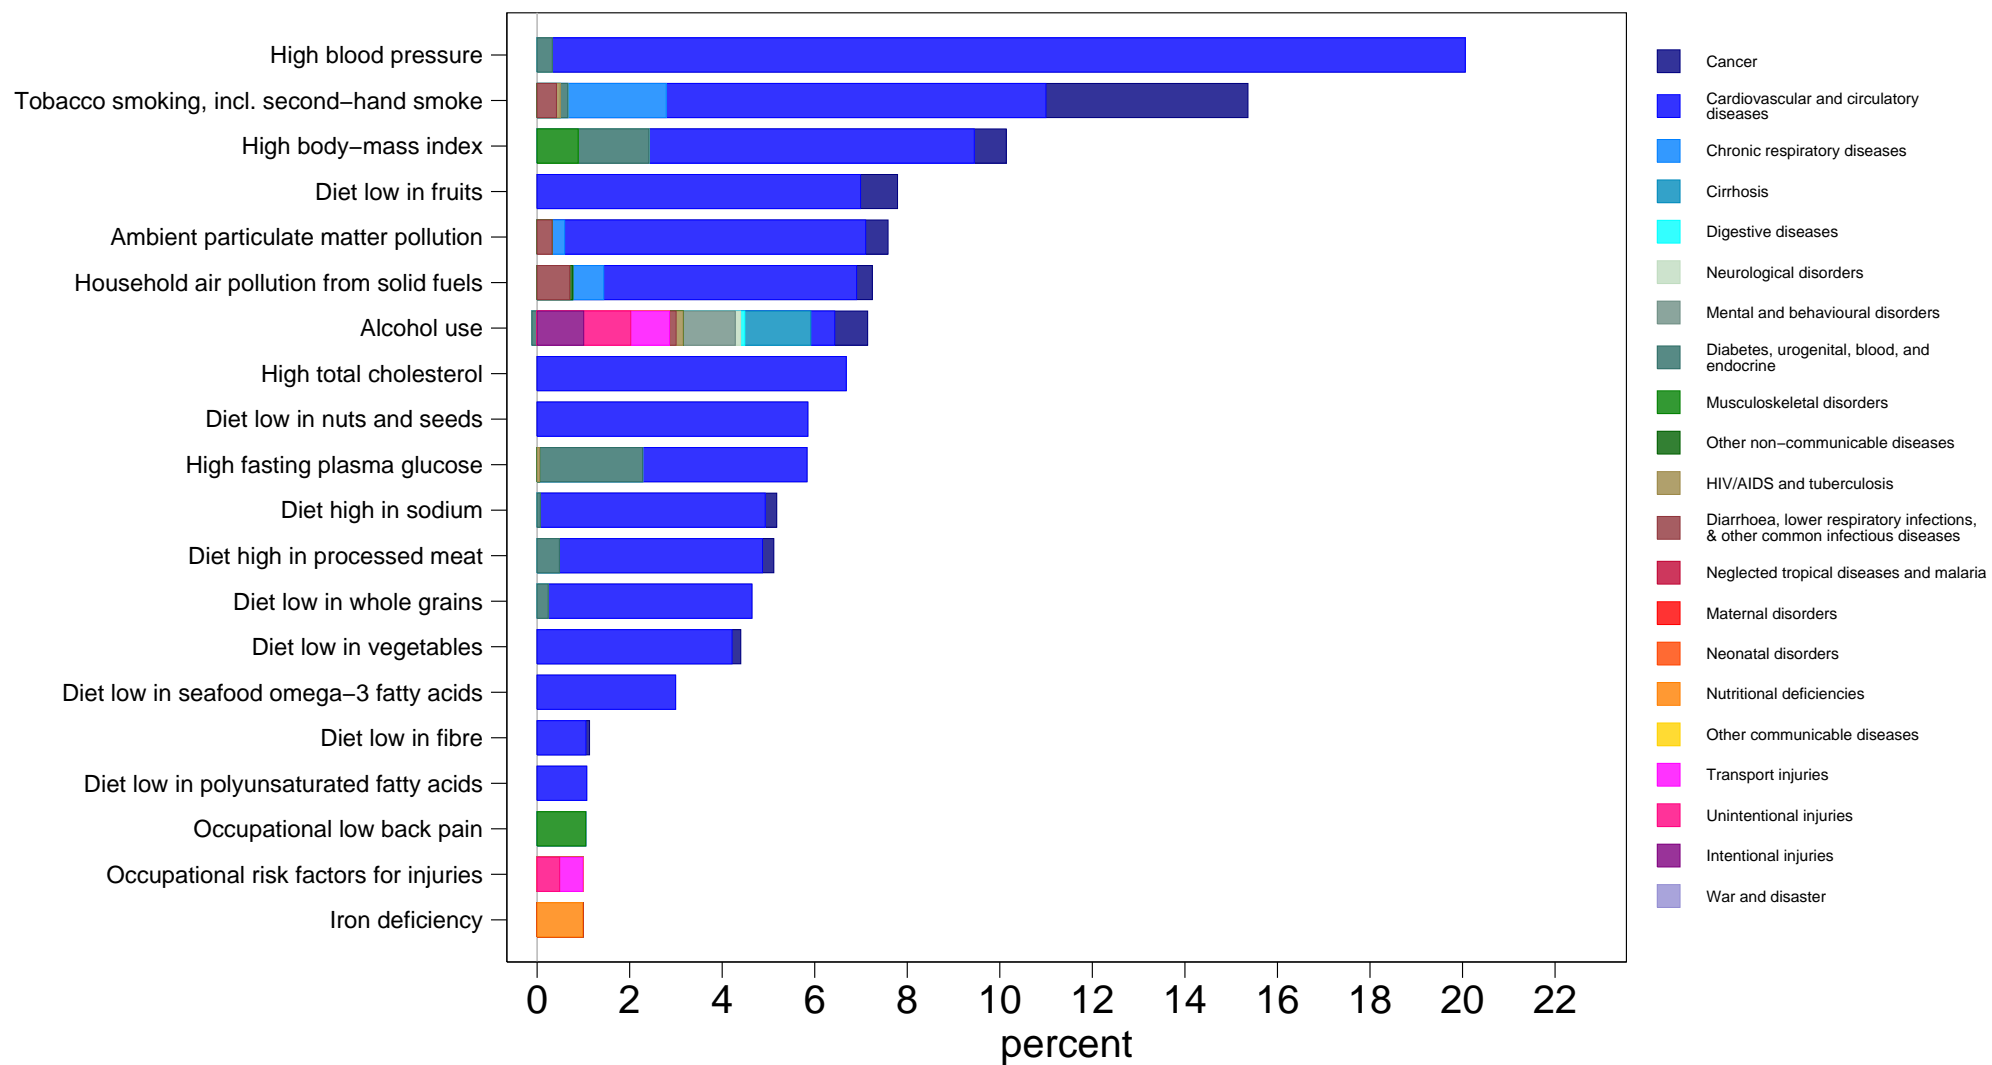



# Web Figure 1: Percent of Central Europe DALYs, 2010

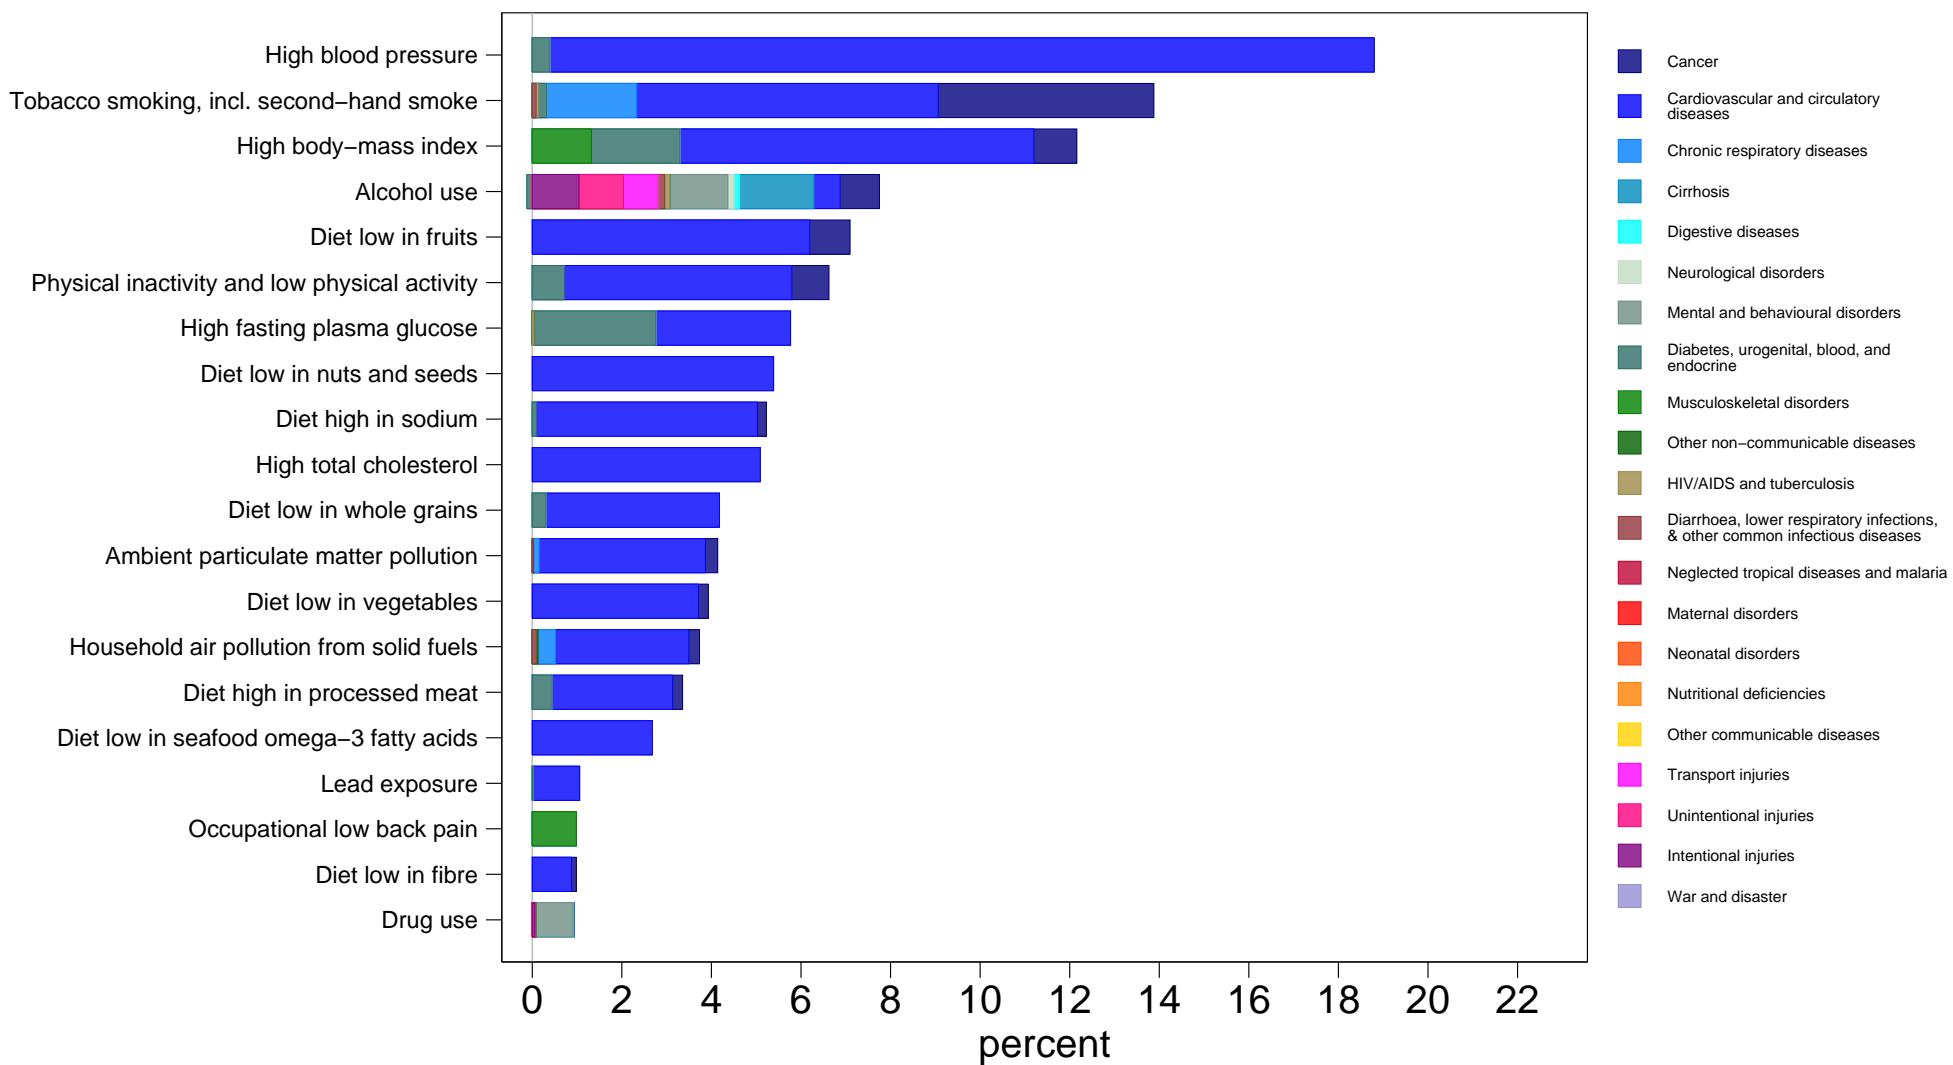

# Web Figure 1: Percent of Eastern Europe DALYs, 1990

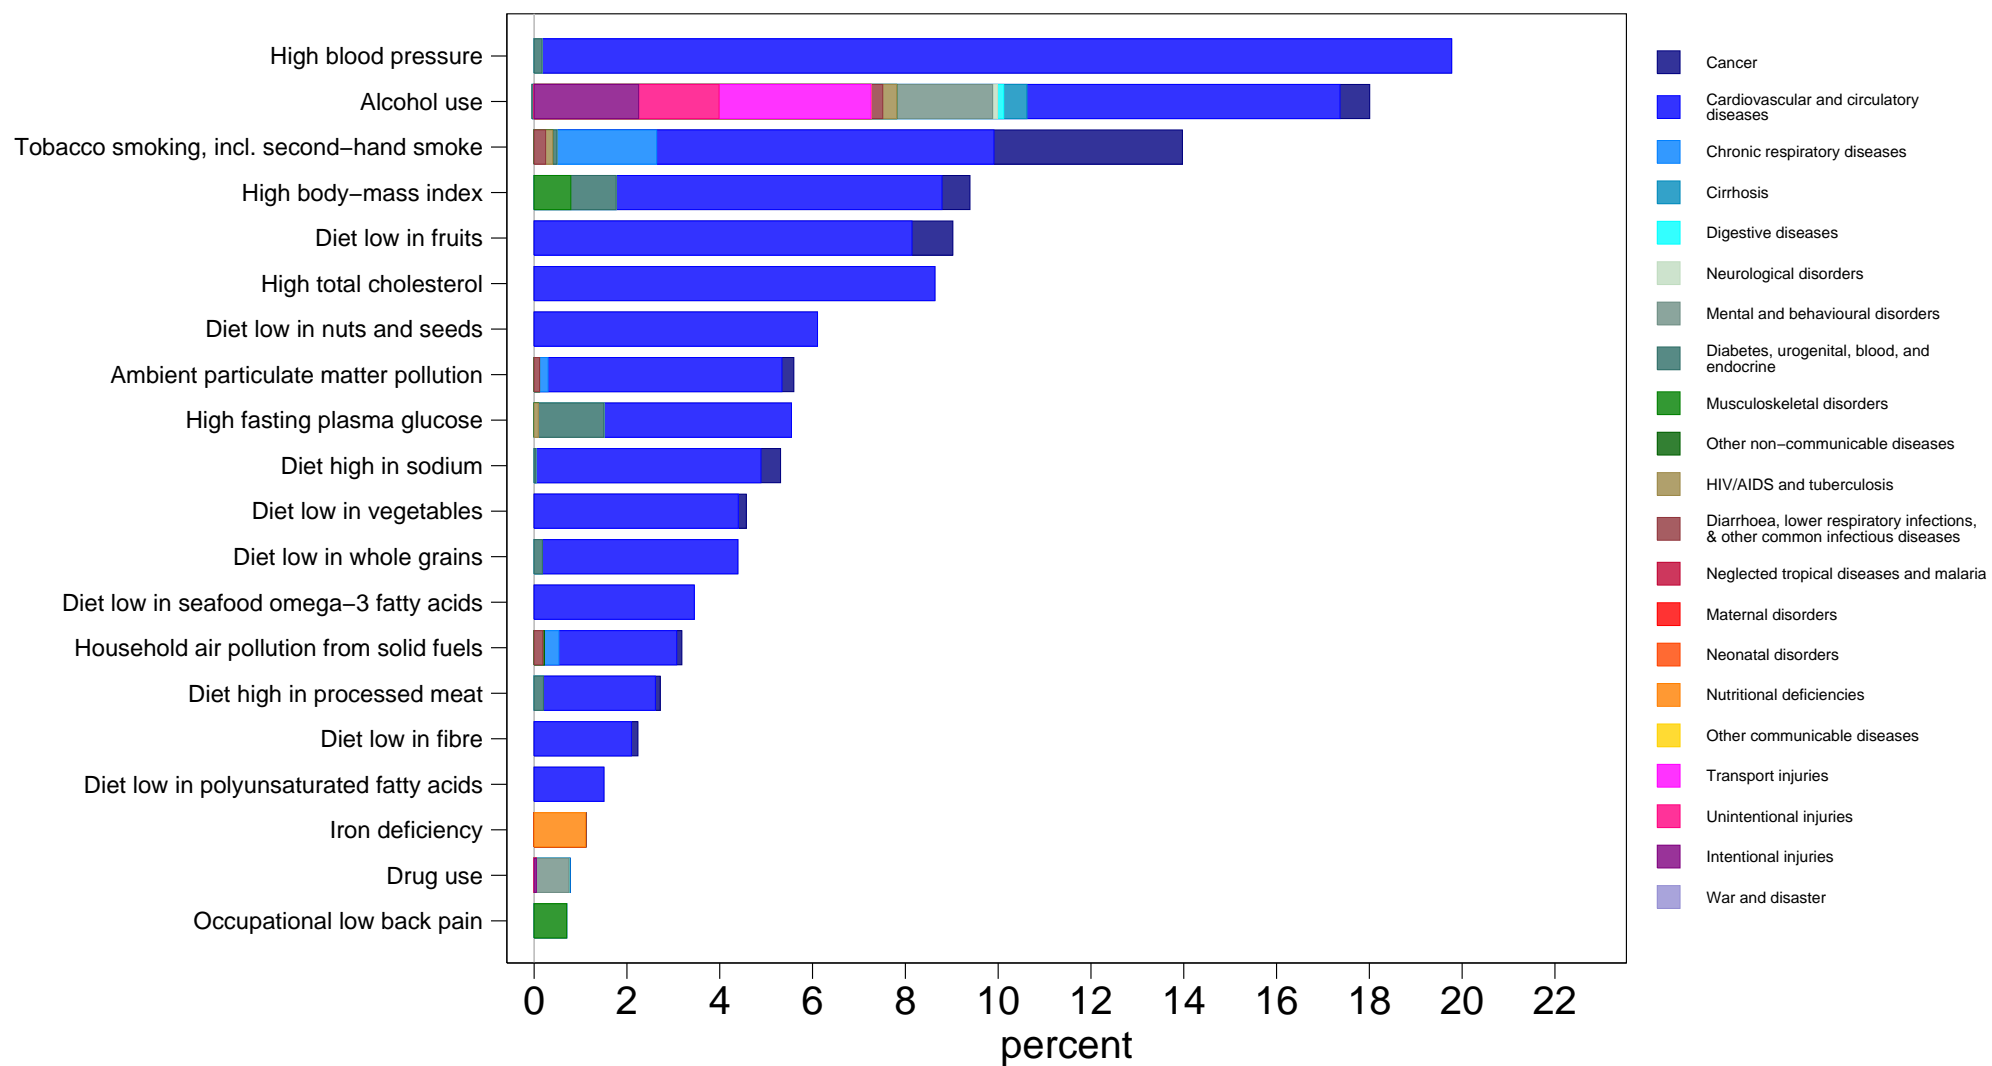

# Web Figure 1: Percent of Eastern Europe DALYs, 2010

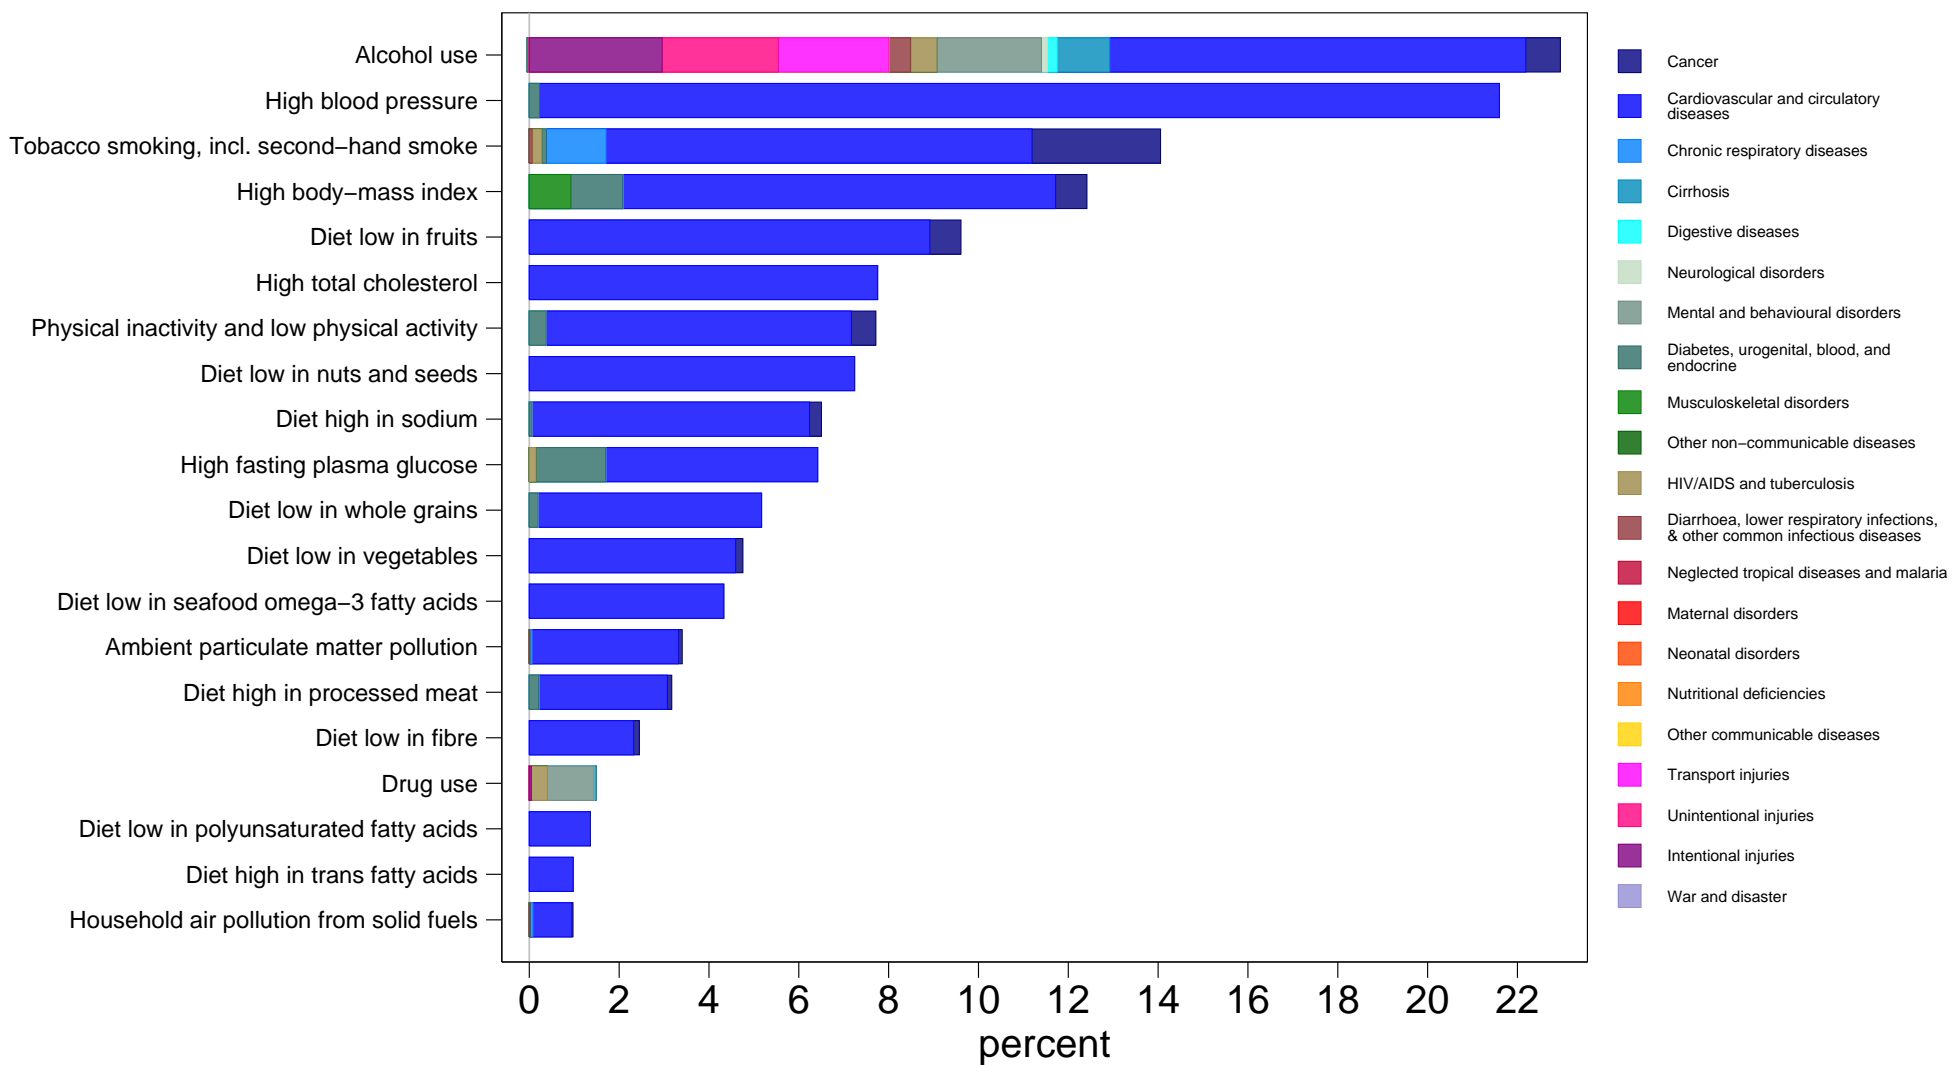

# Web Figure 1: Percent of Western Europe DALYs, 1990

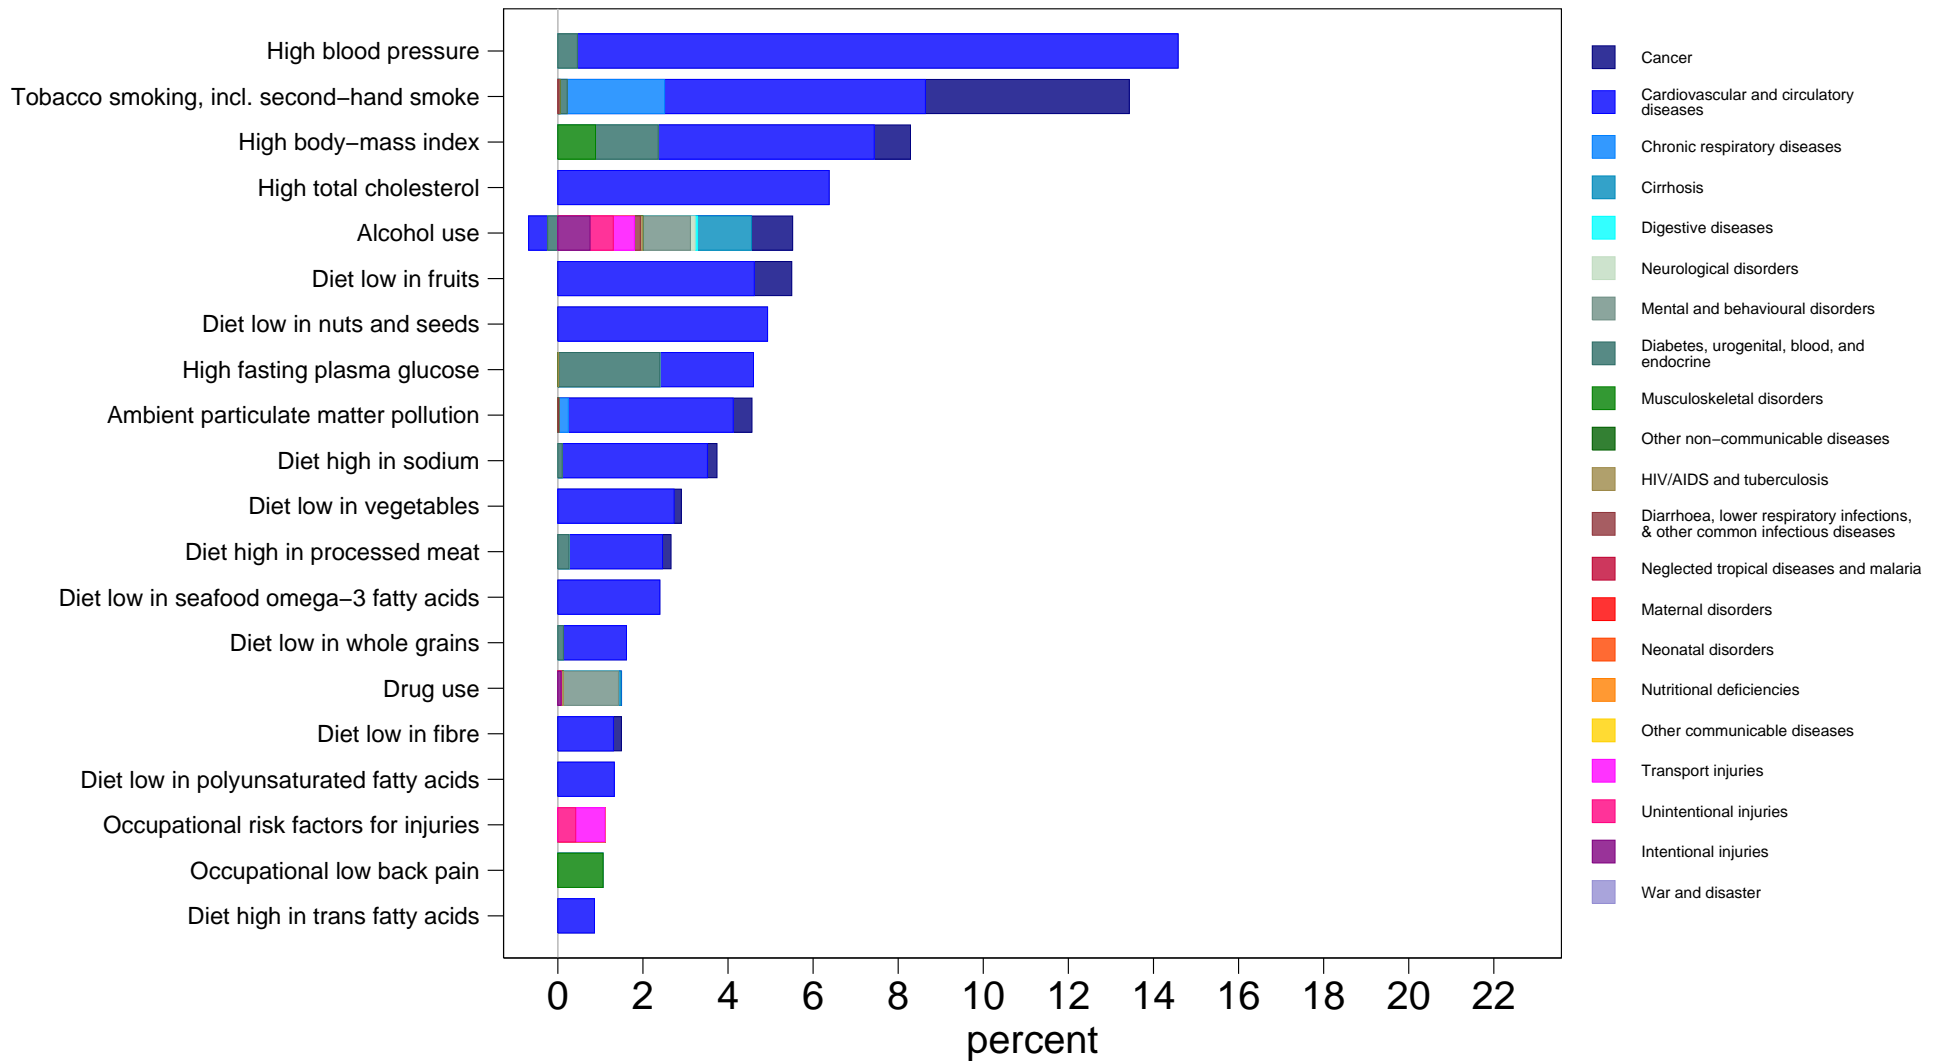

# Web Figure 1: Percent of Western Europe DALYs, 2010

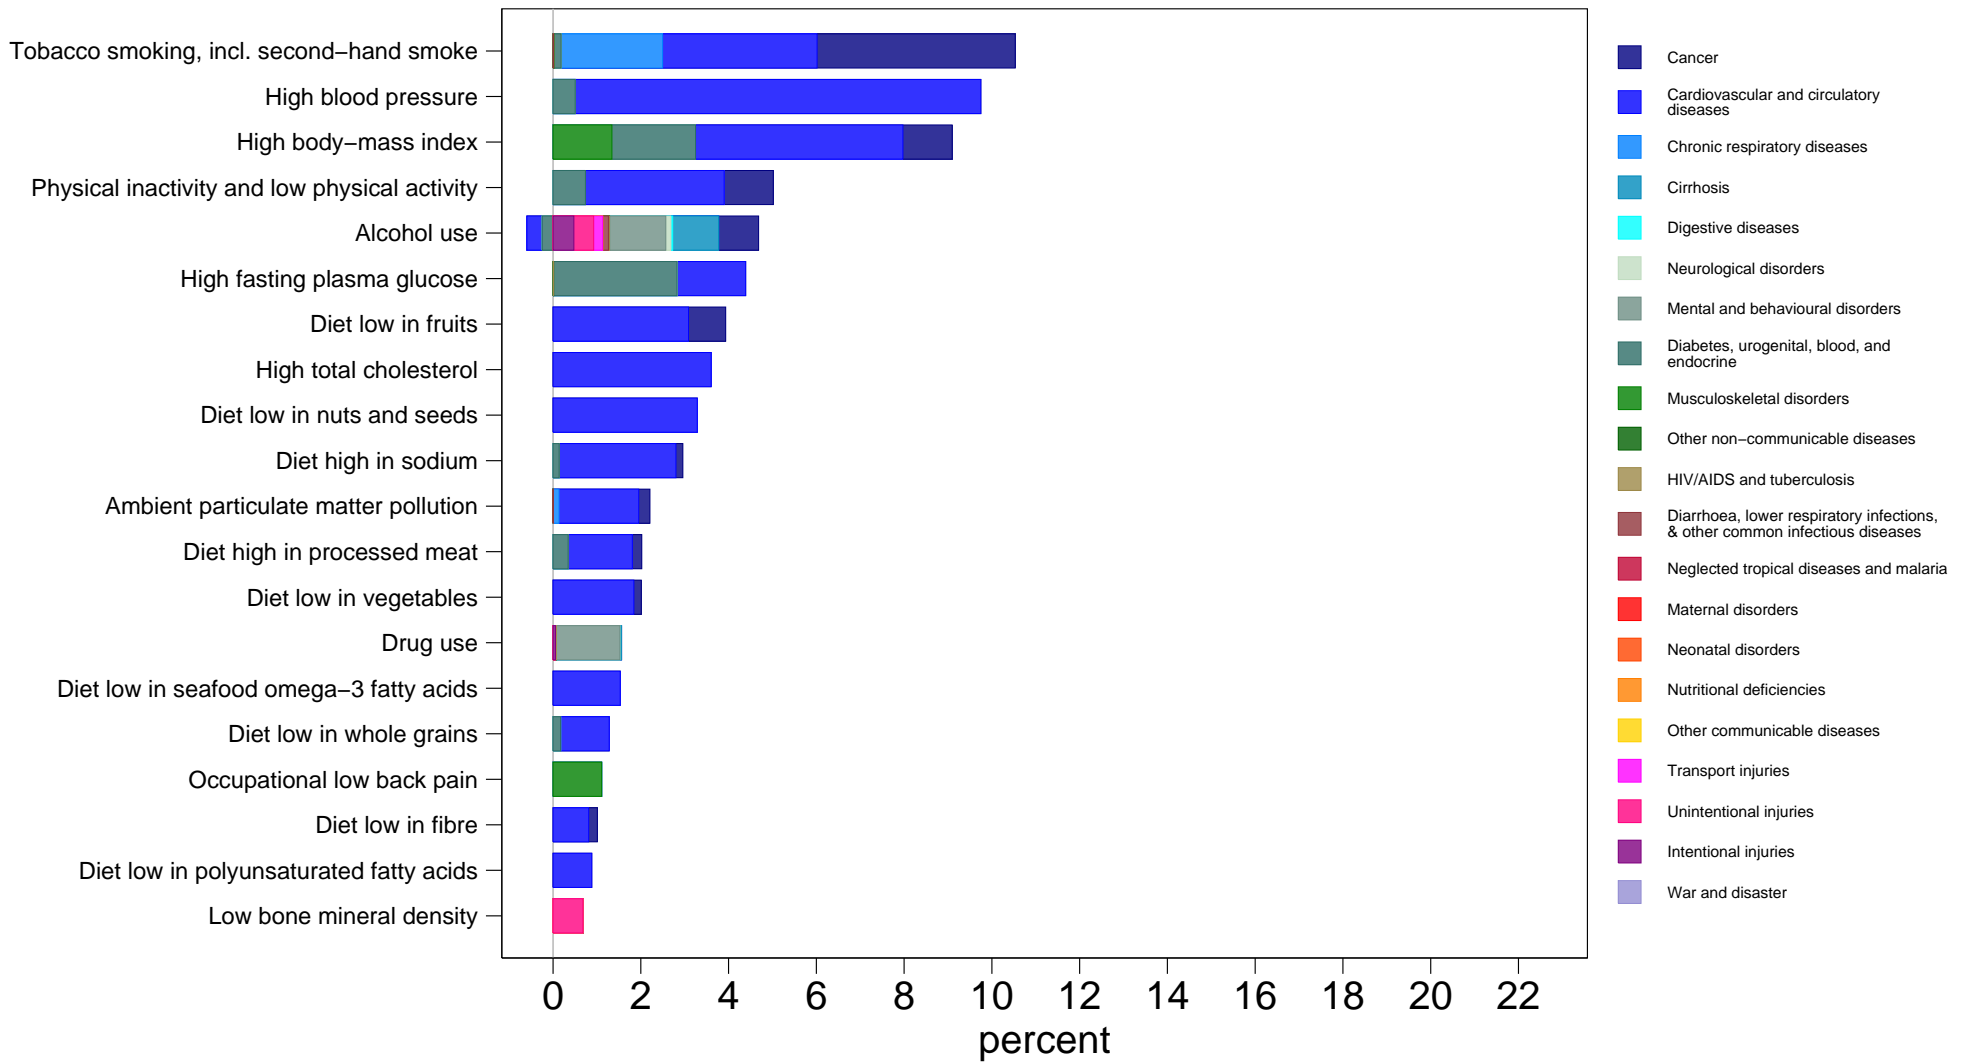

# Web Figure 1: Percent of Andean Latin America DALYs, 1990

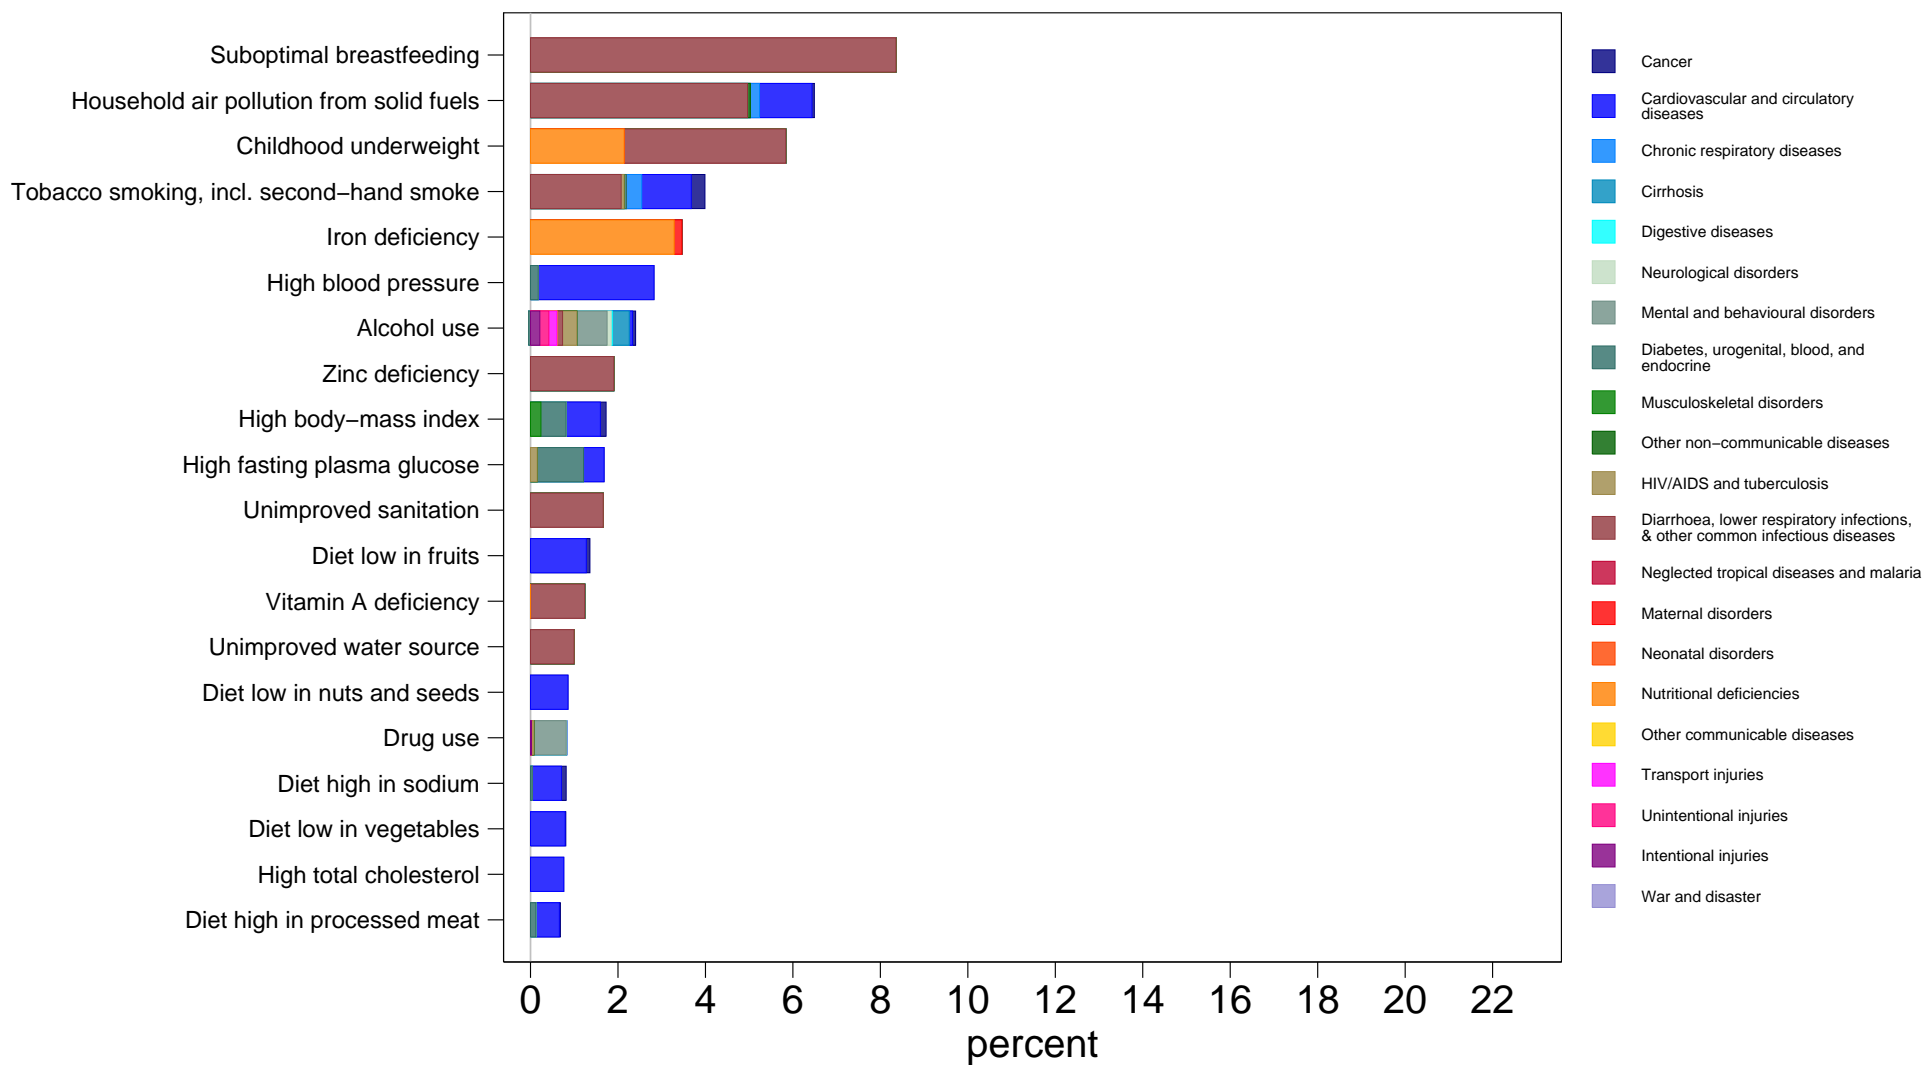

# Web Figure 1: Percent of Andean Latin America DALYs, 2010

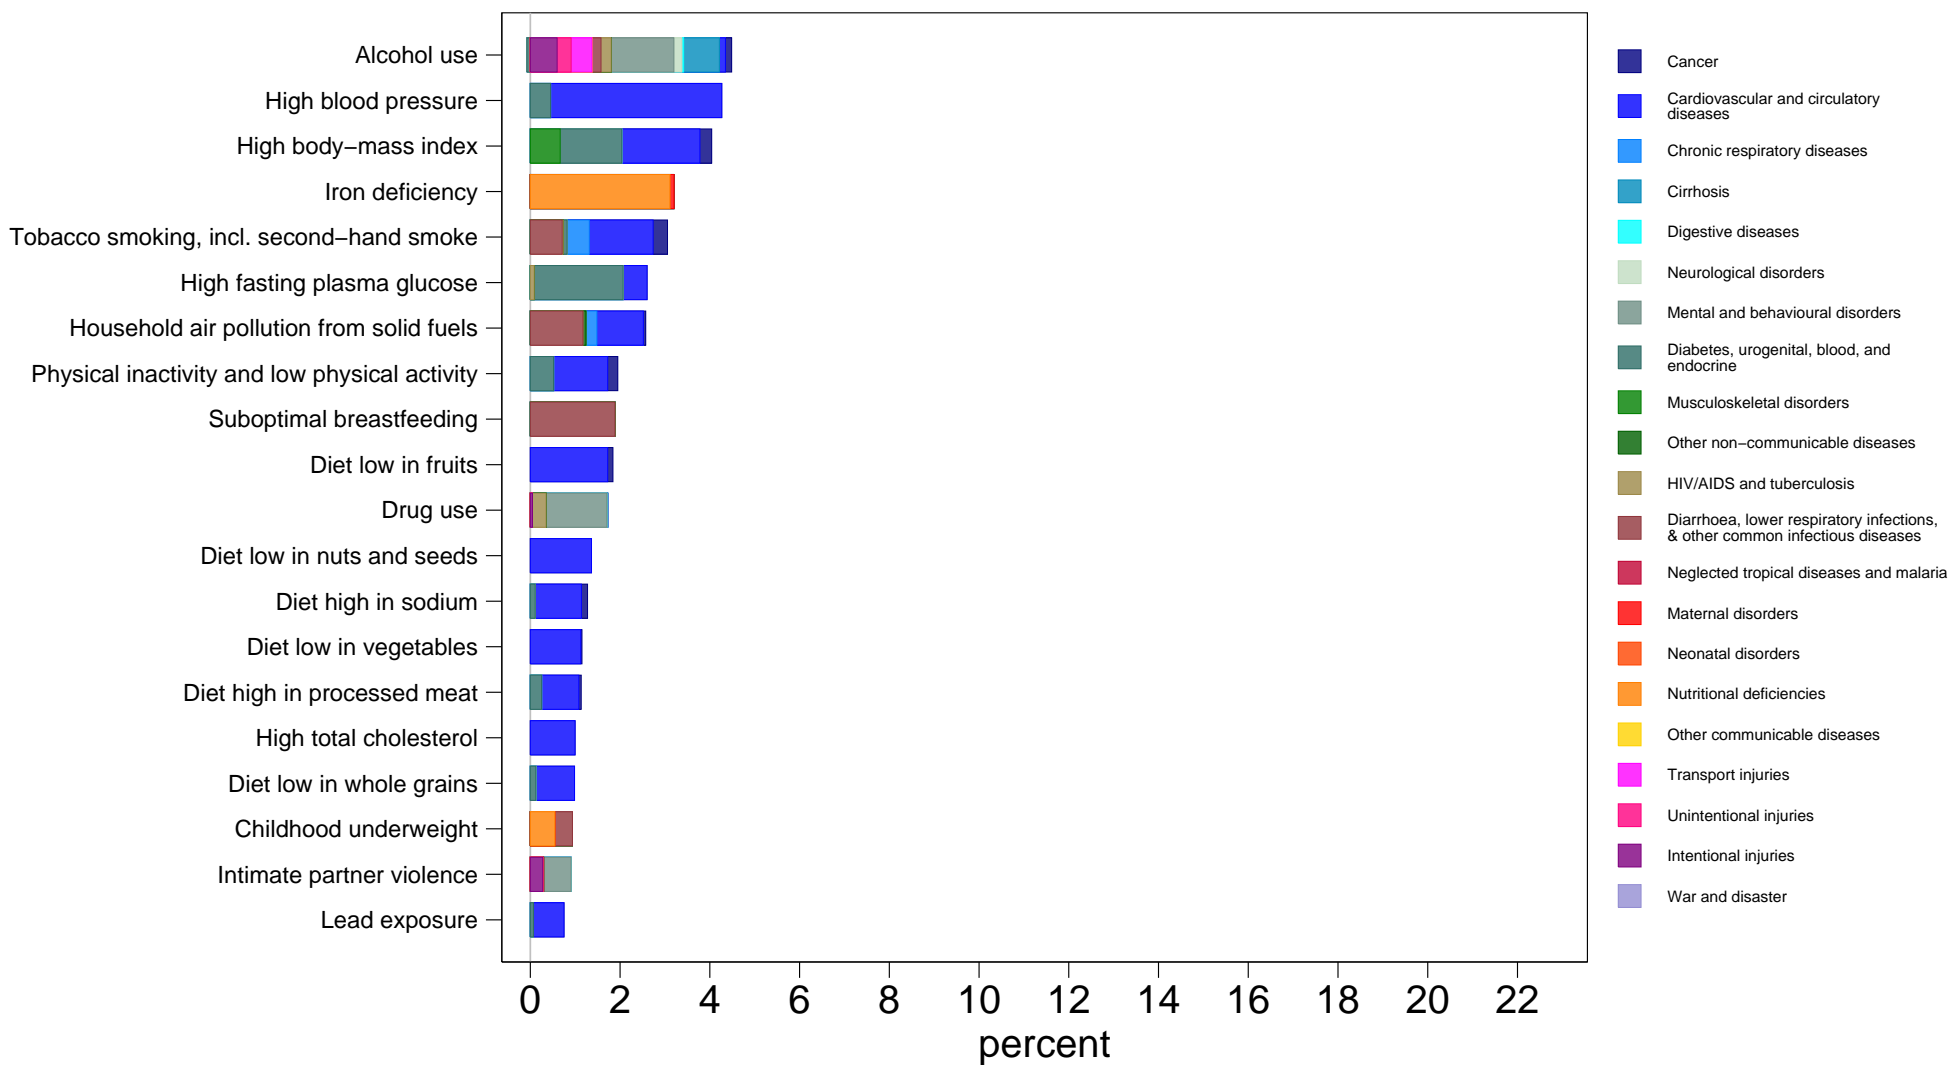

# Web Figure 1: Percent of Central Latin America DALYs, 1990

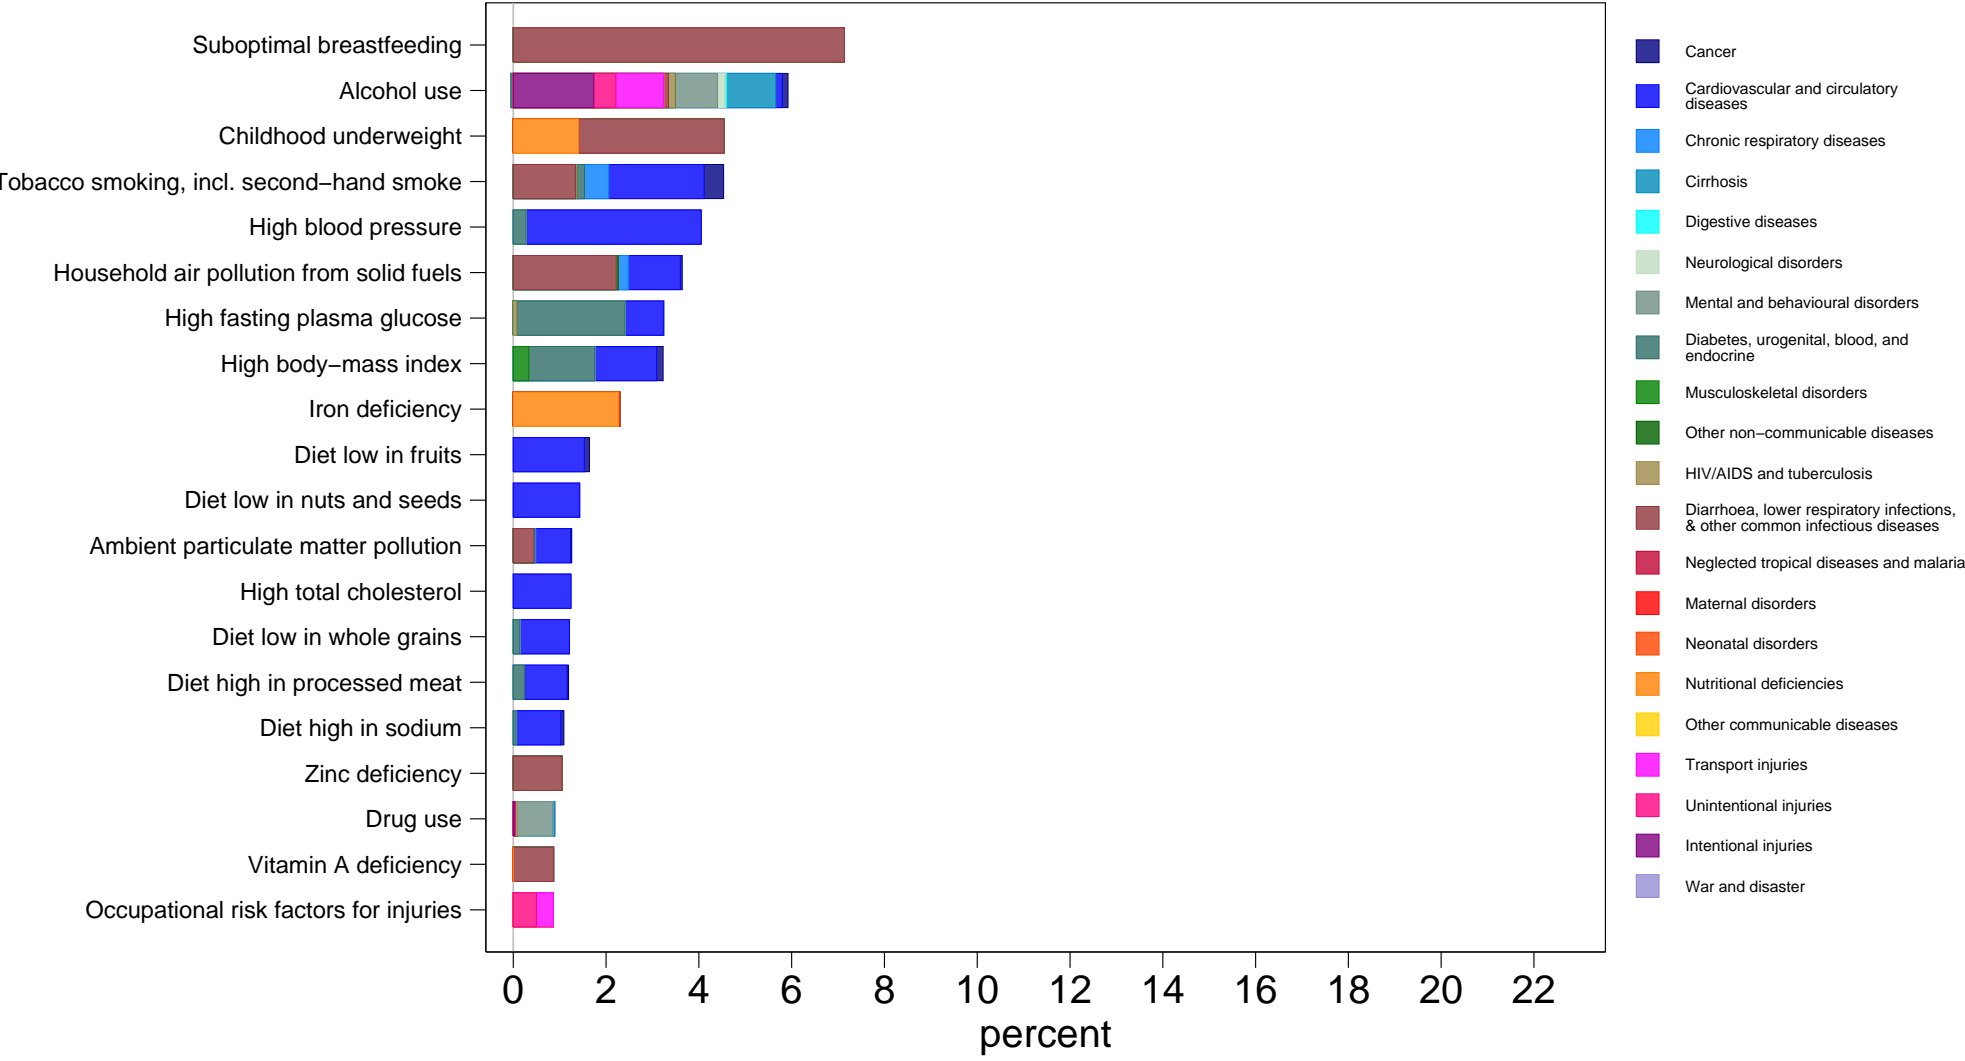



# Web Figure 1: Percent of Central Latin America DALYs, 2010

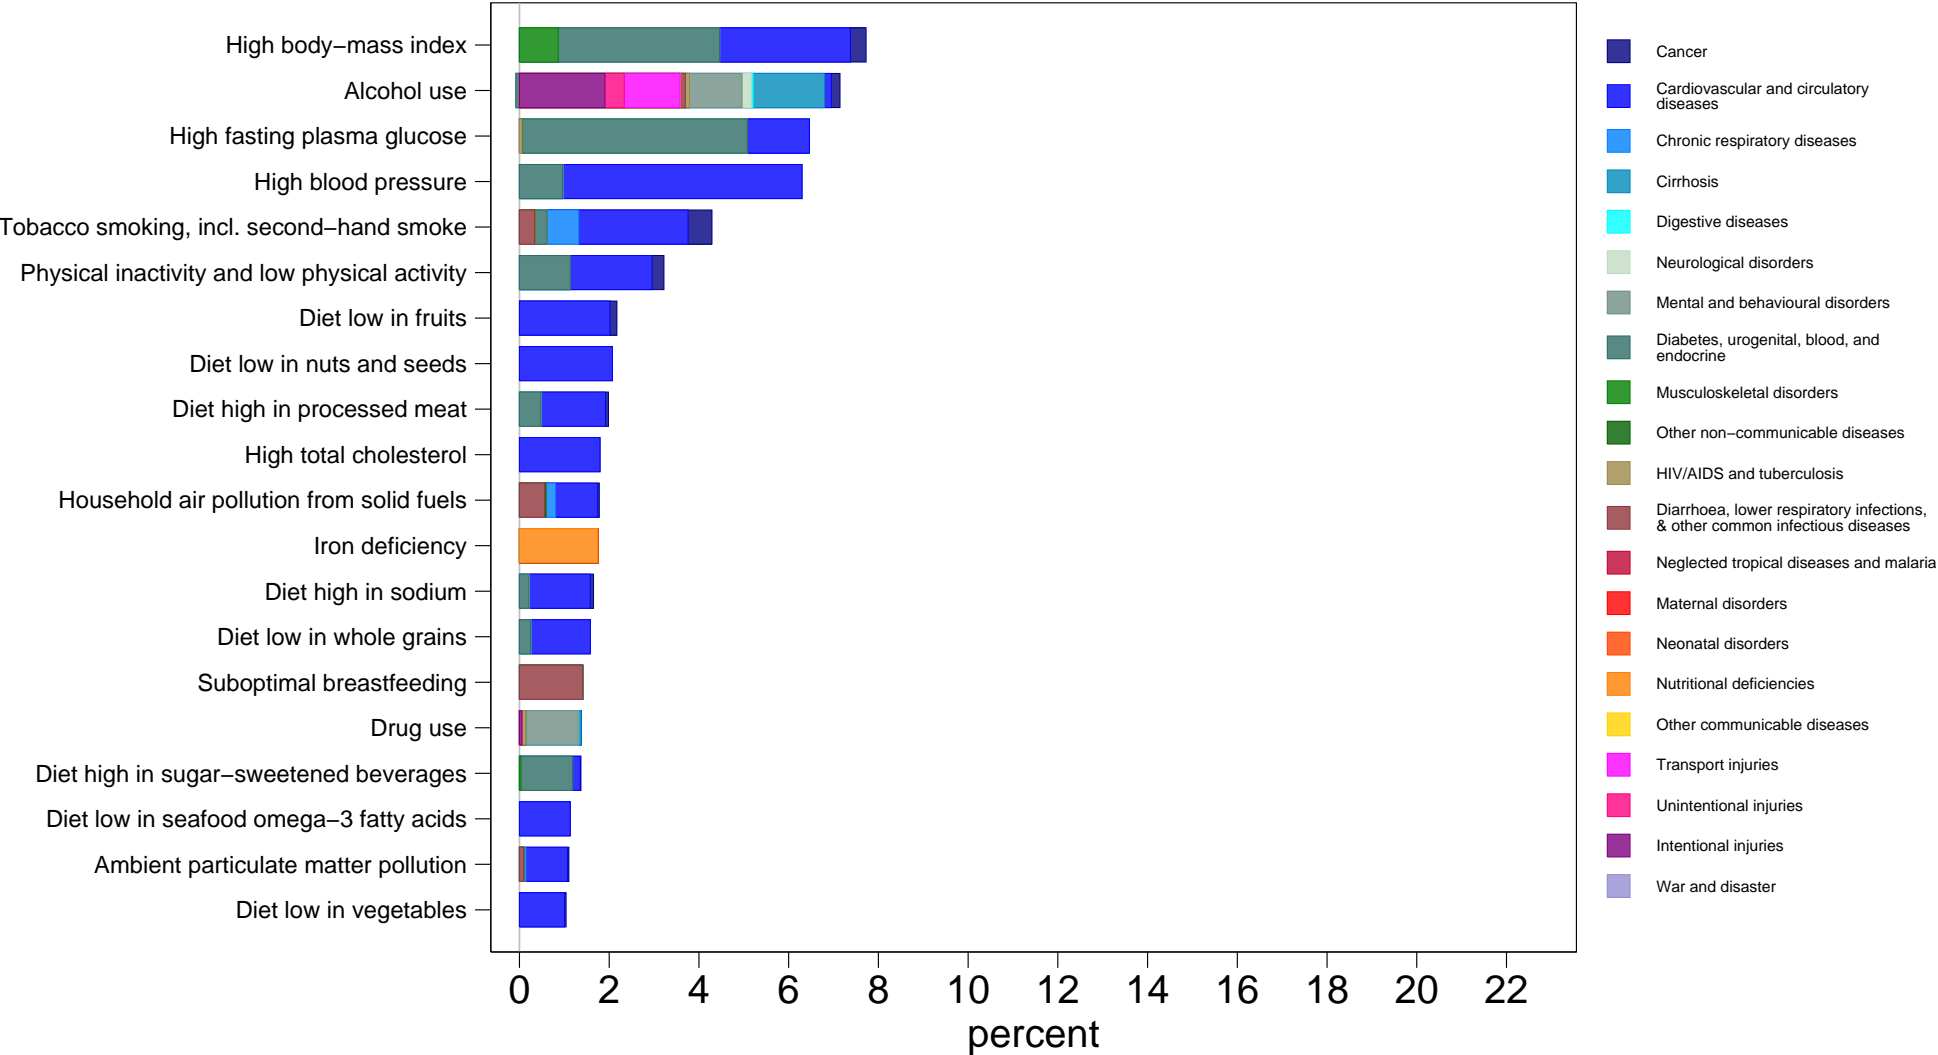

# Web Figure 1: Percent of Southern Latin America DALYs, 1990

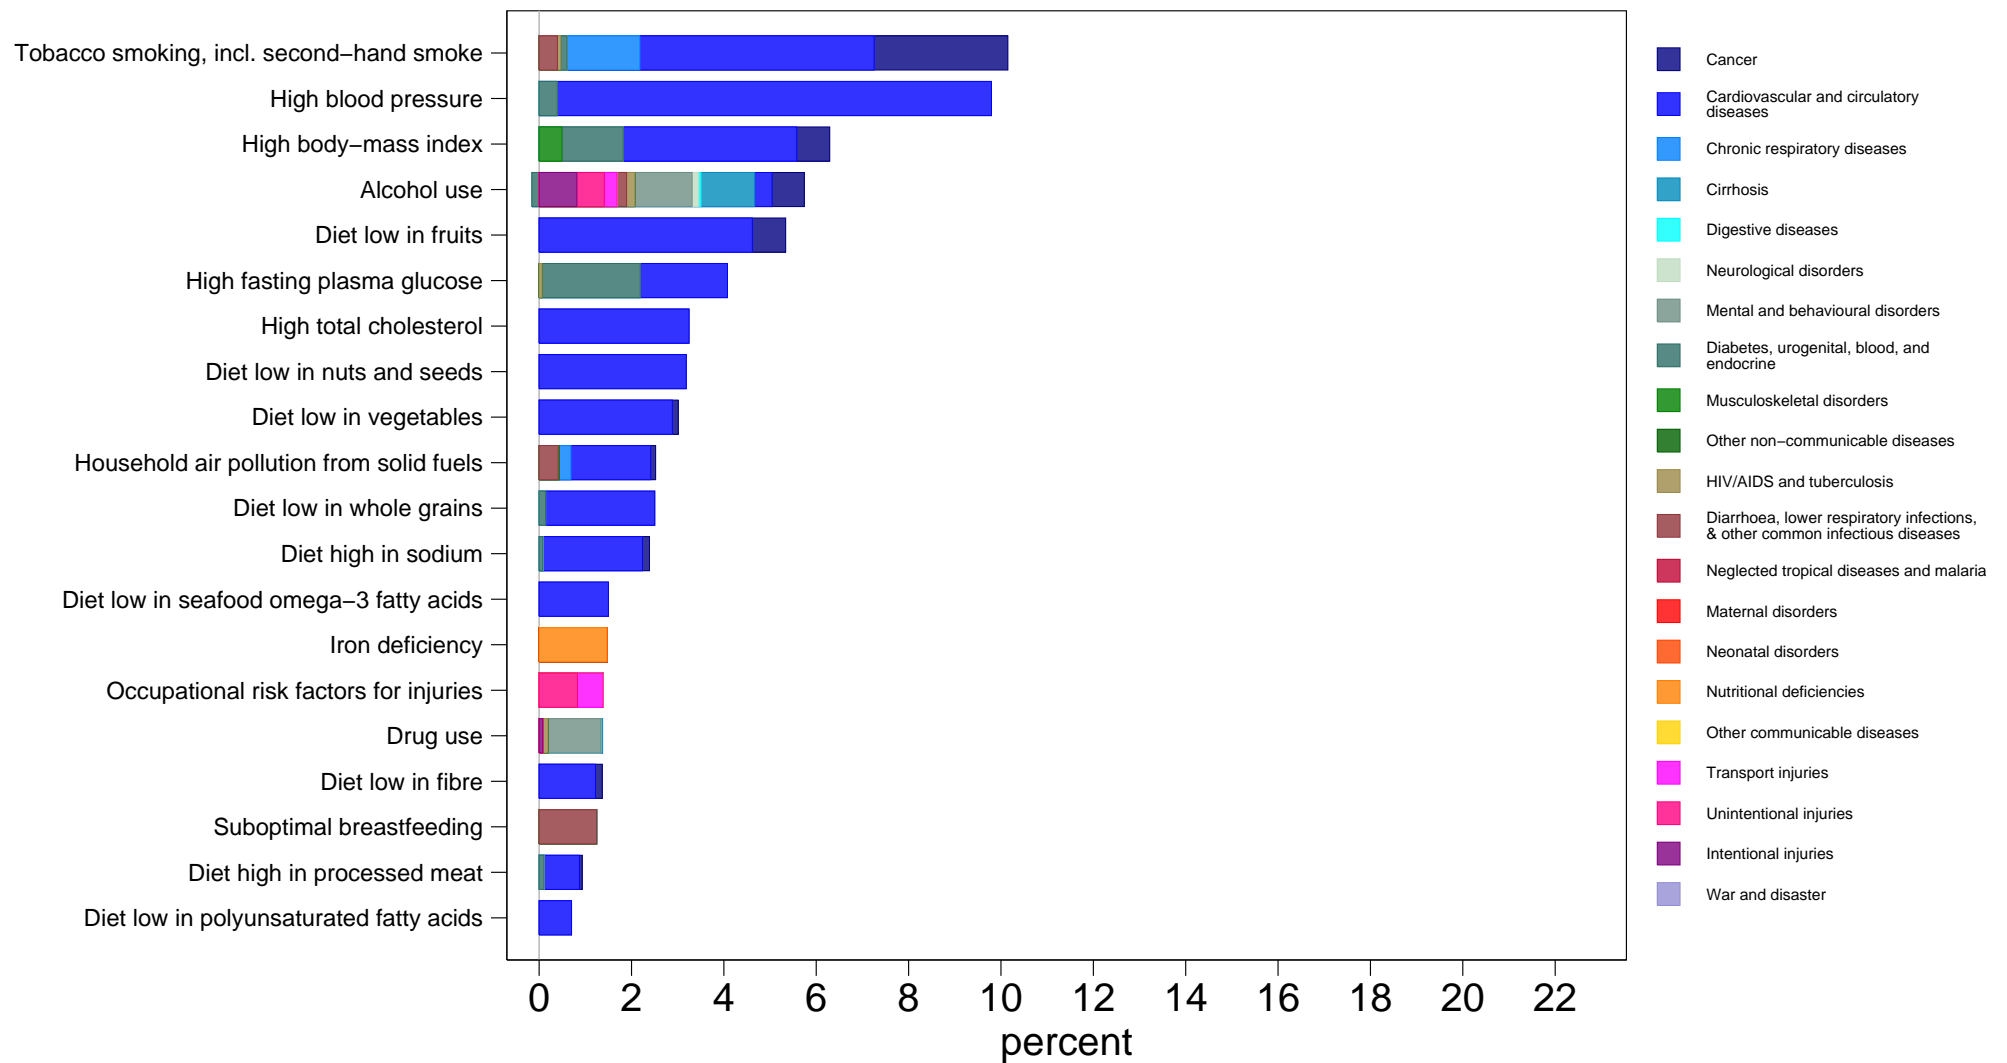

# Web Figure 1: Percent of Southern Latin America DALYs, 2010

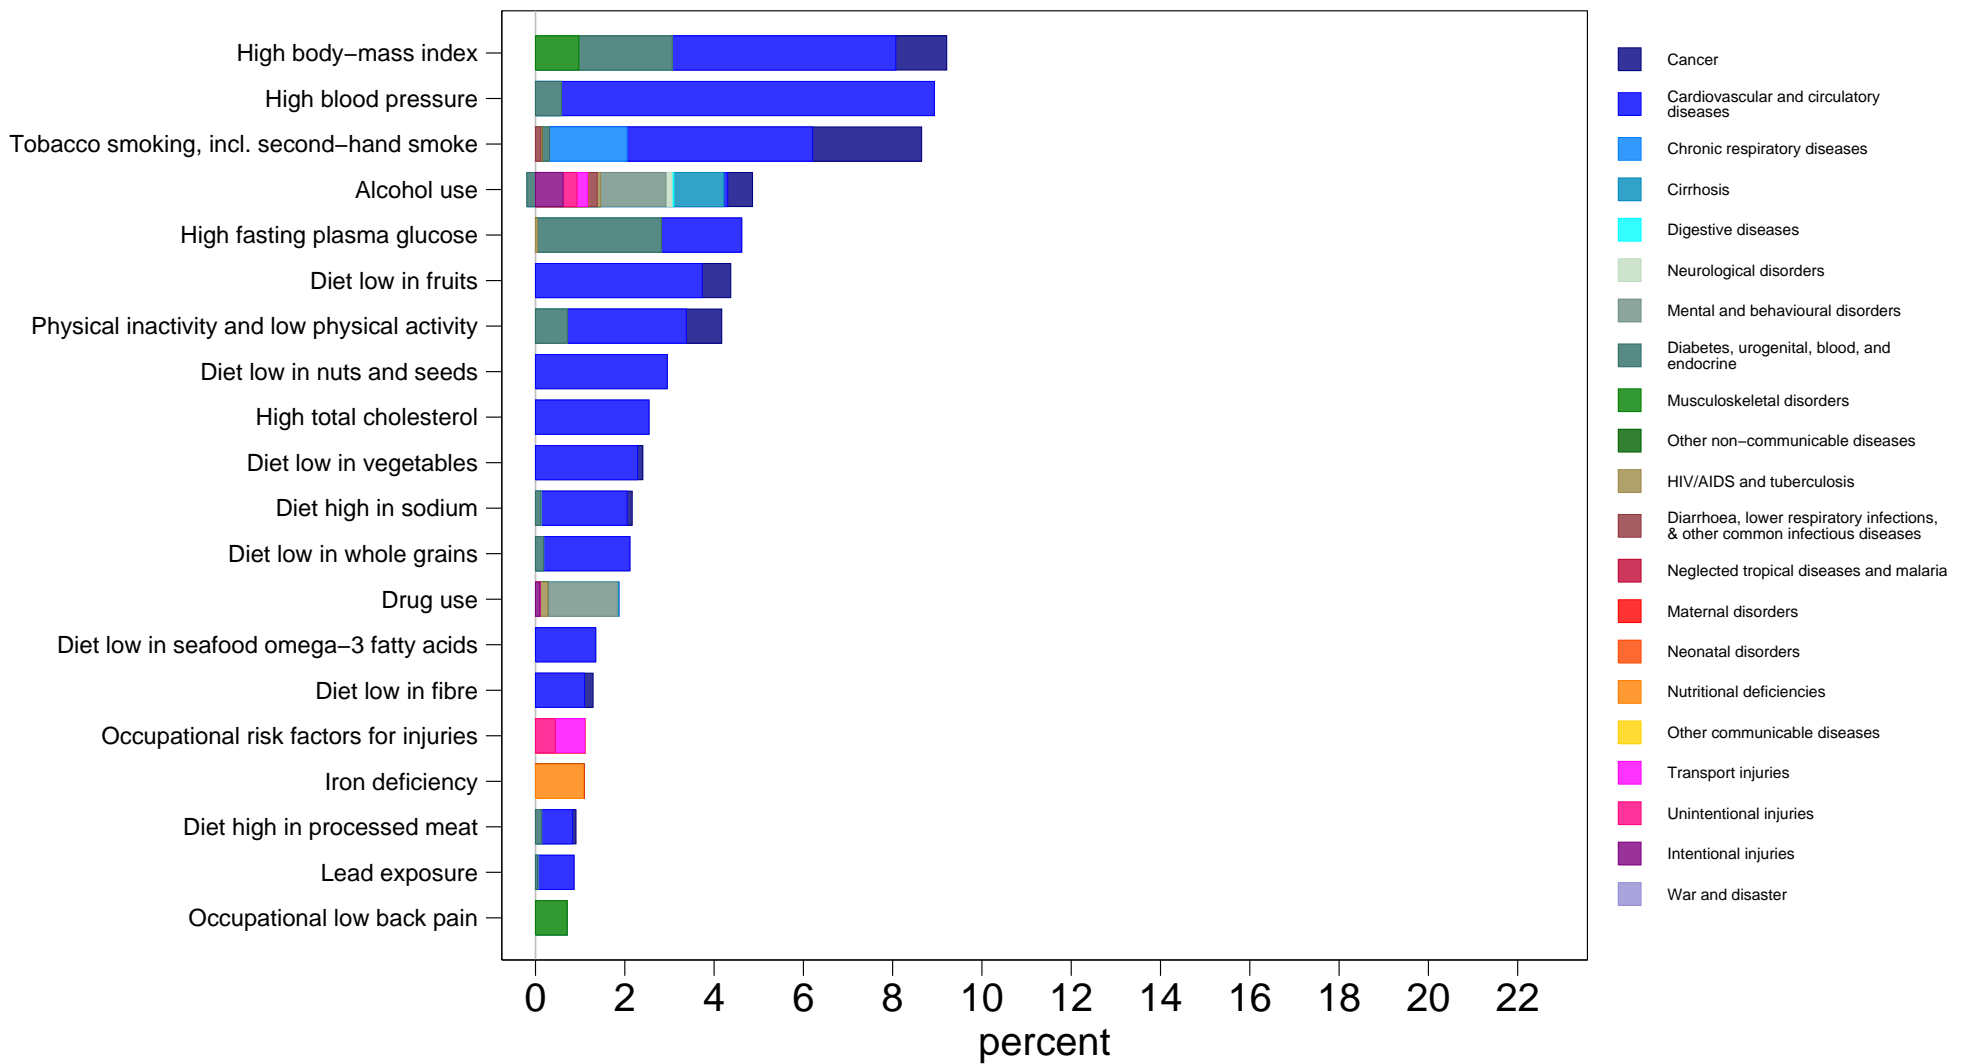

# Web Figure 1: Percent of Tropical Latin America DALYs, 1990

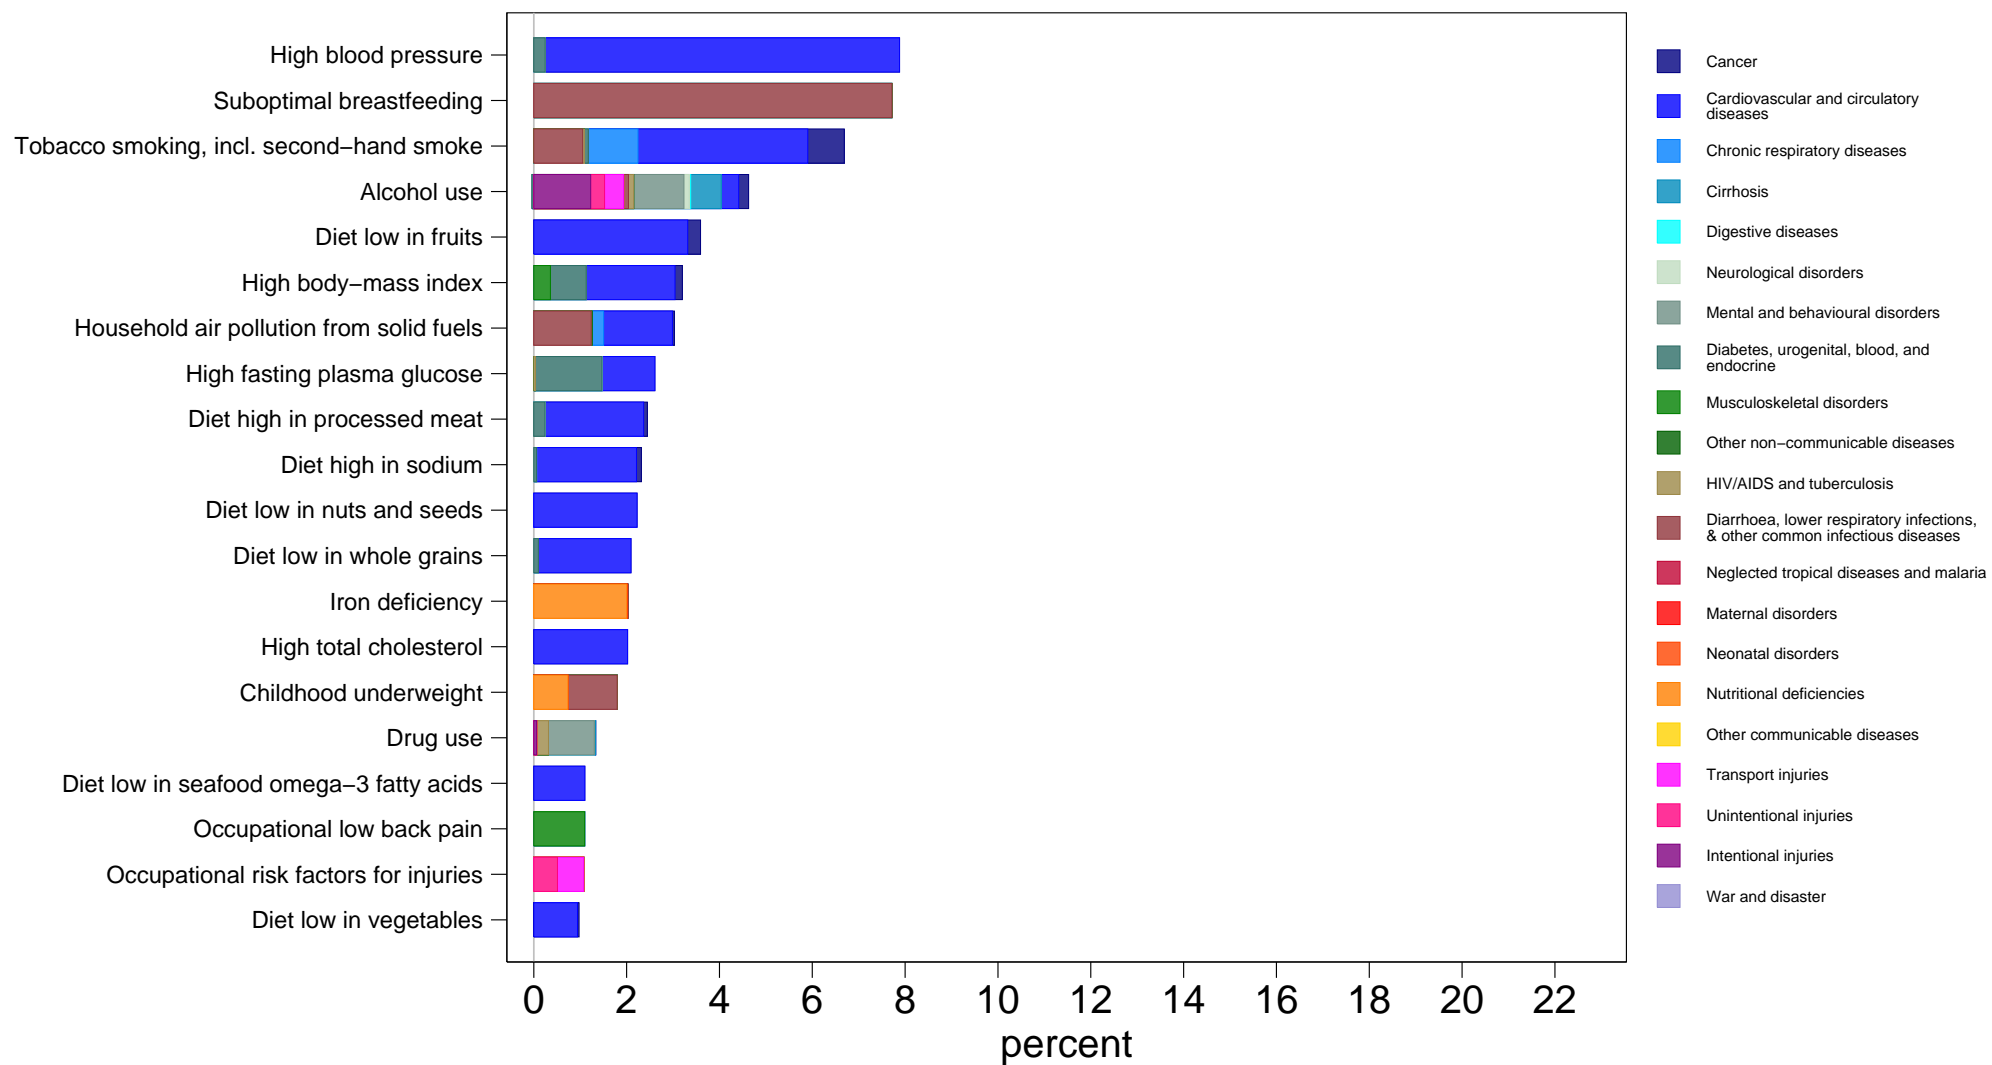

# Web Figure 1: Percent of Tropical Latin America DALYs, 2010

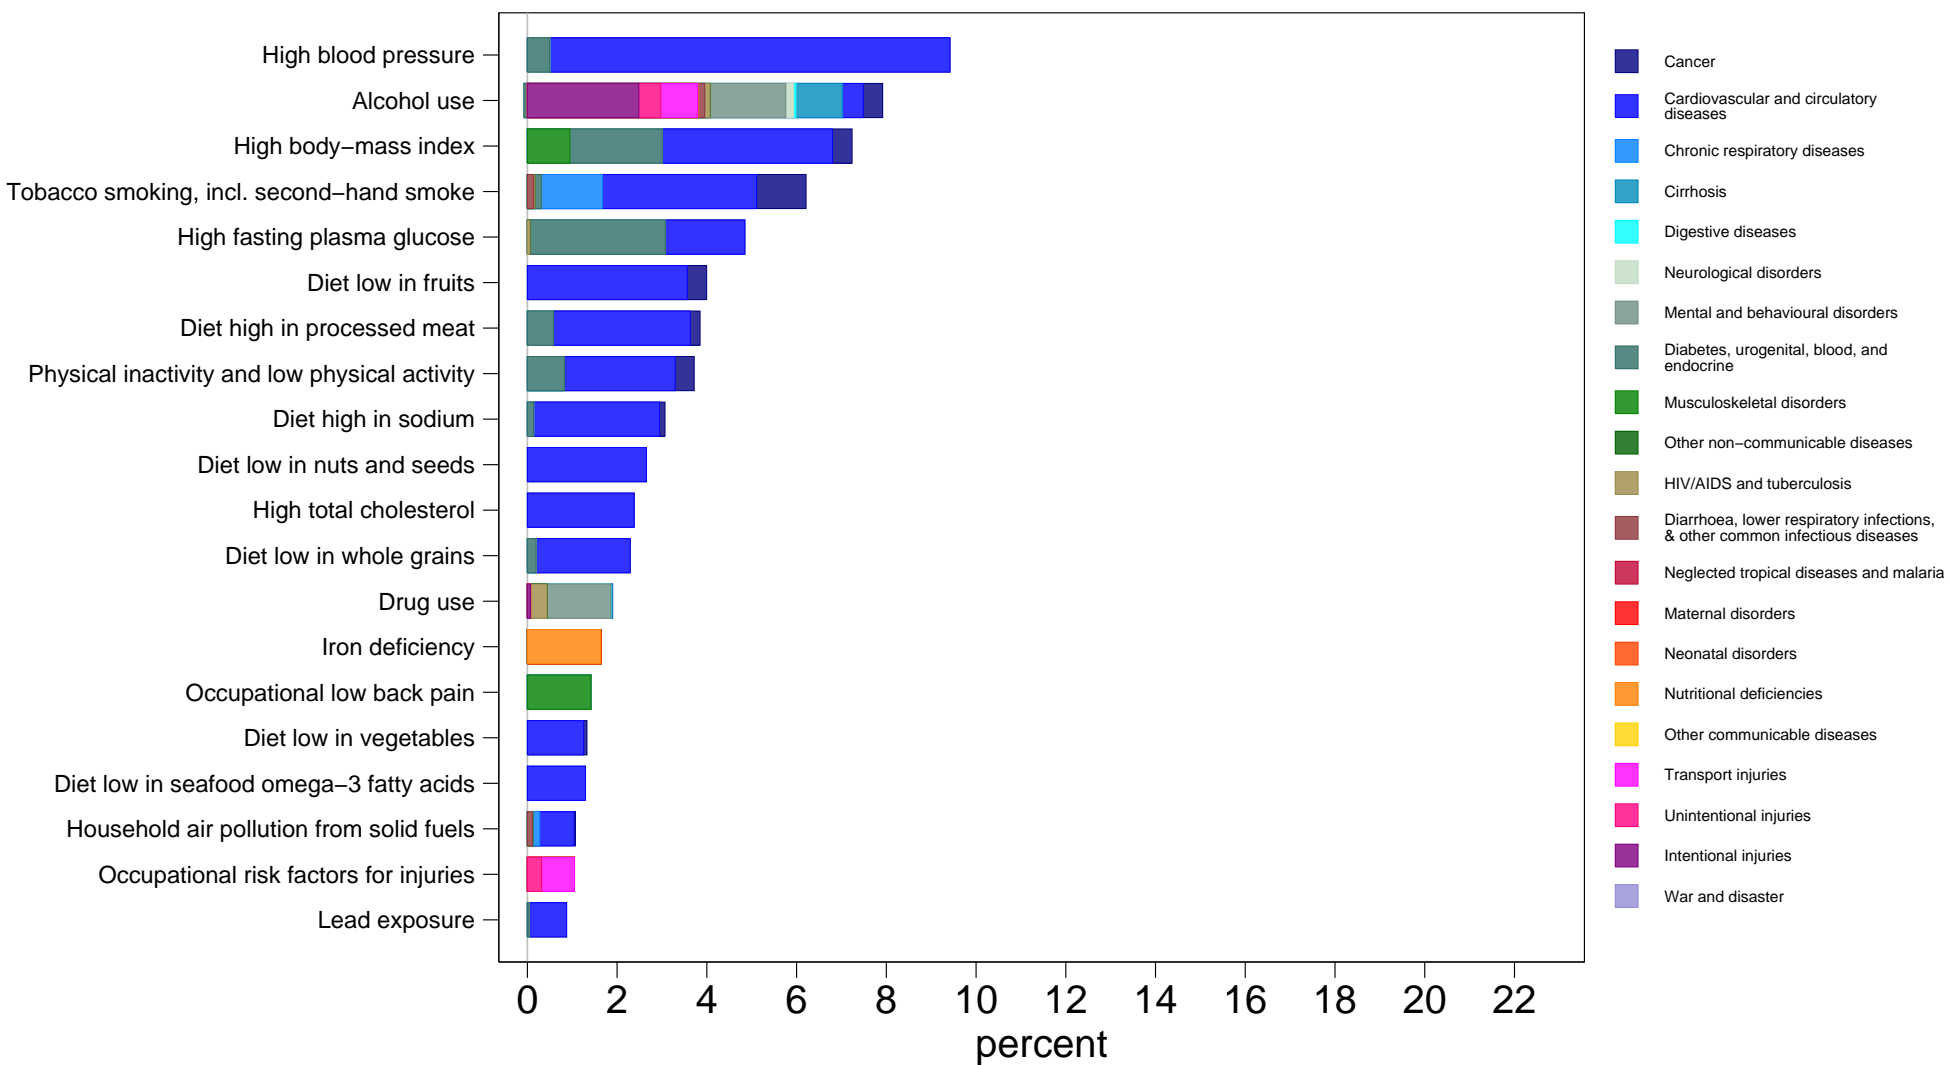

# Web Figure 1: Percent of North Africa and Middle East DALYs, 1990

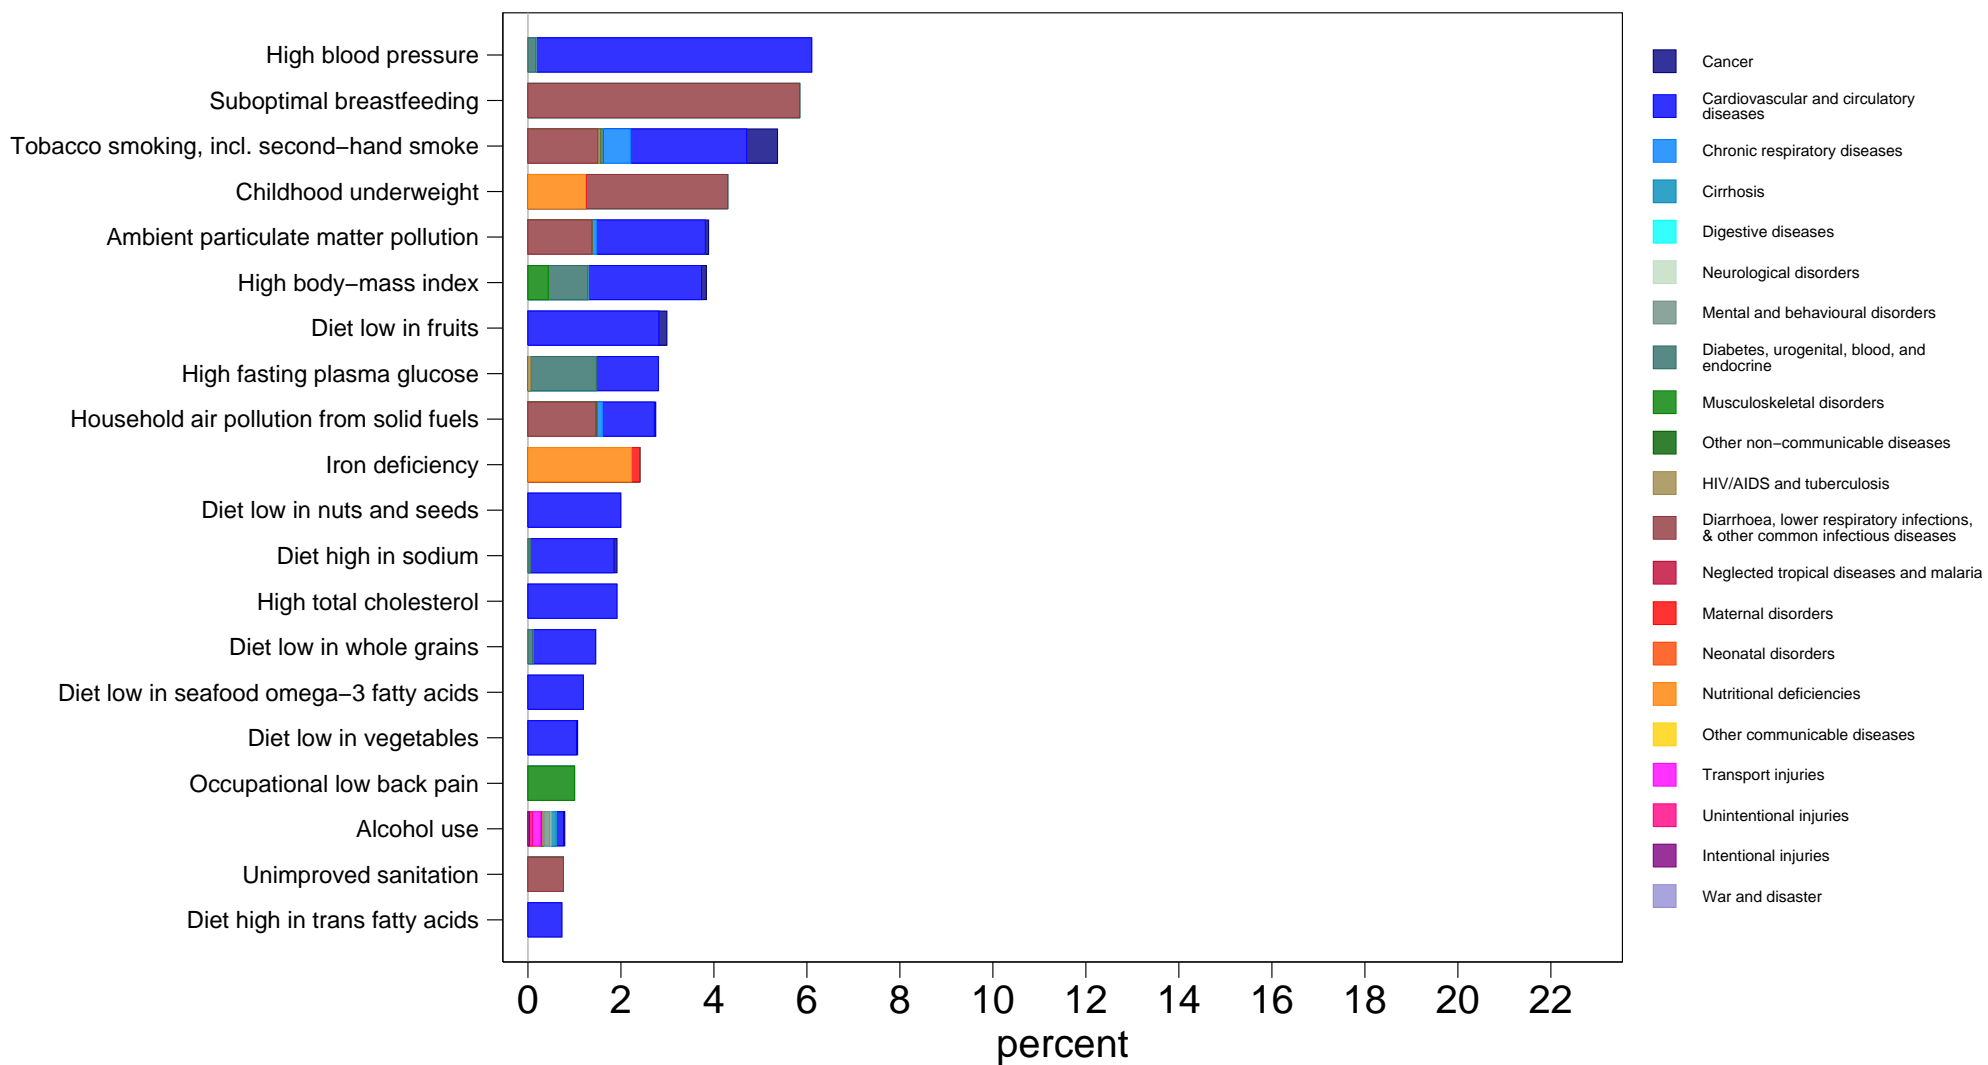

# Web Figure 1: Percent of North Africa and Middle East DALYs, 2010

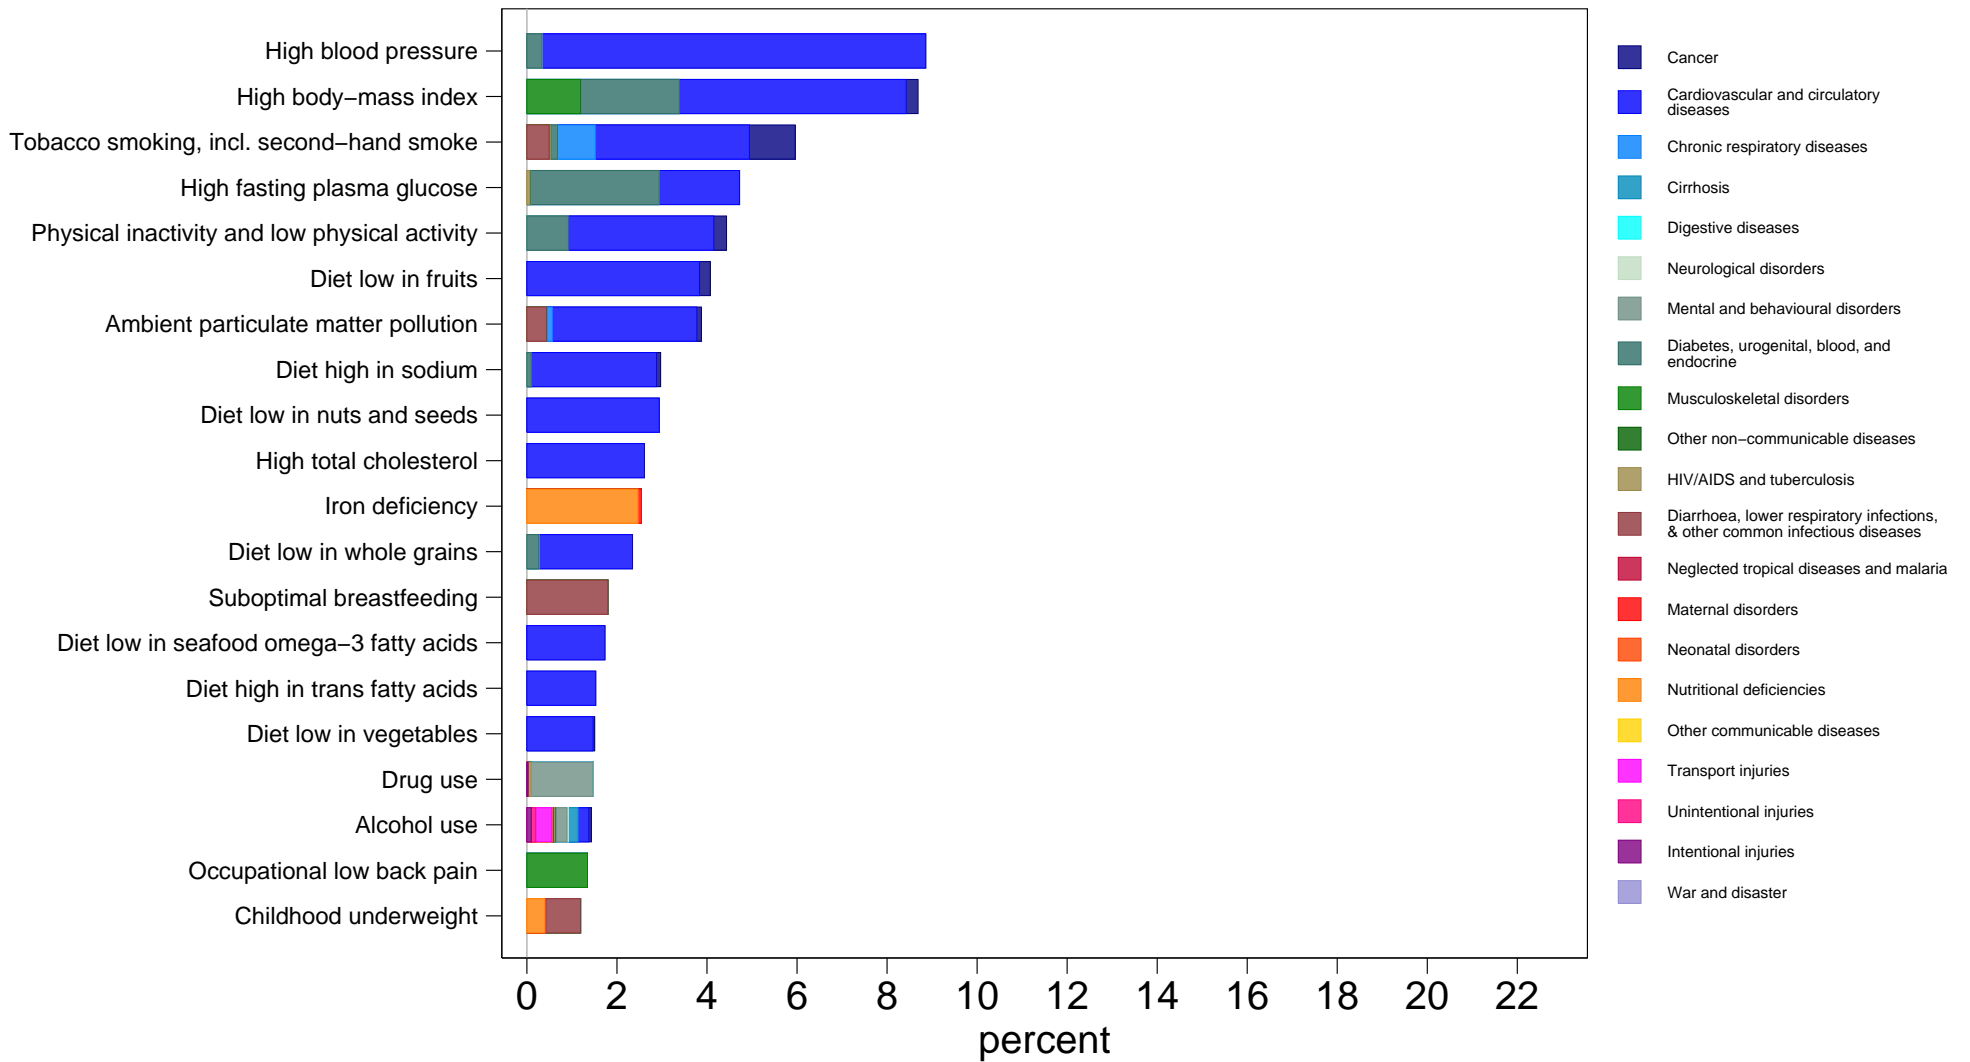

# Web Figure 1: Percent of High-income North America DALYs, 1990

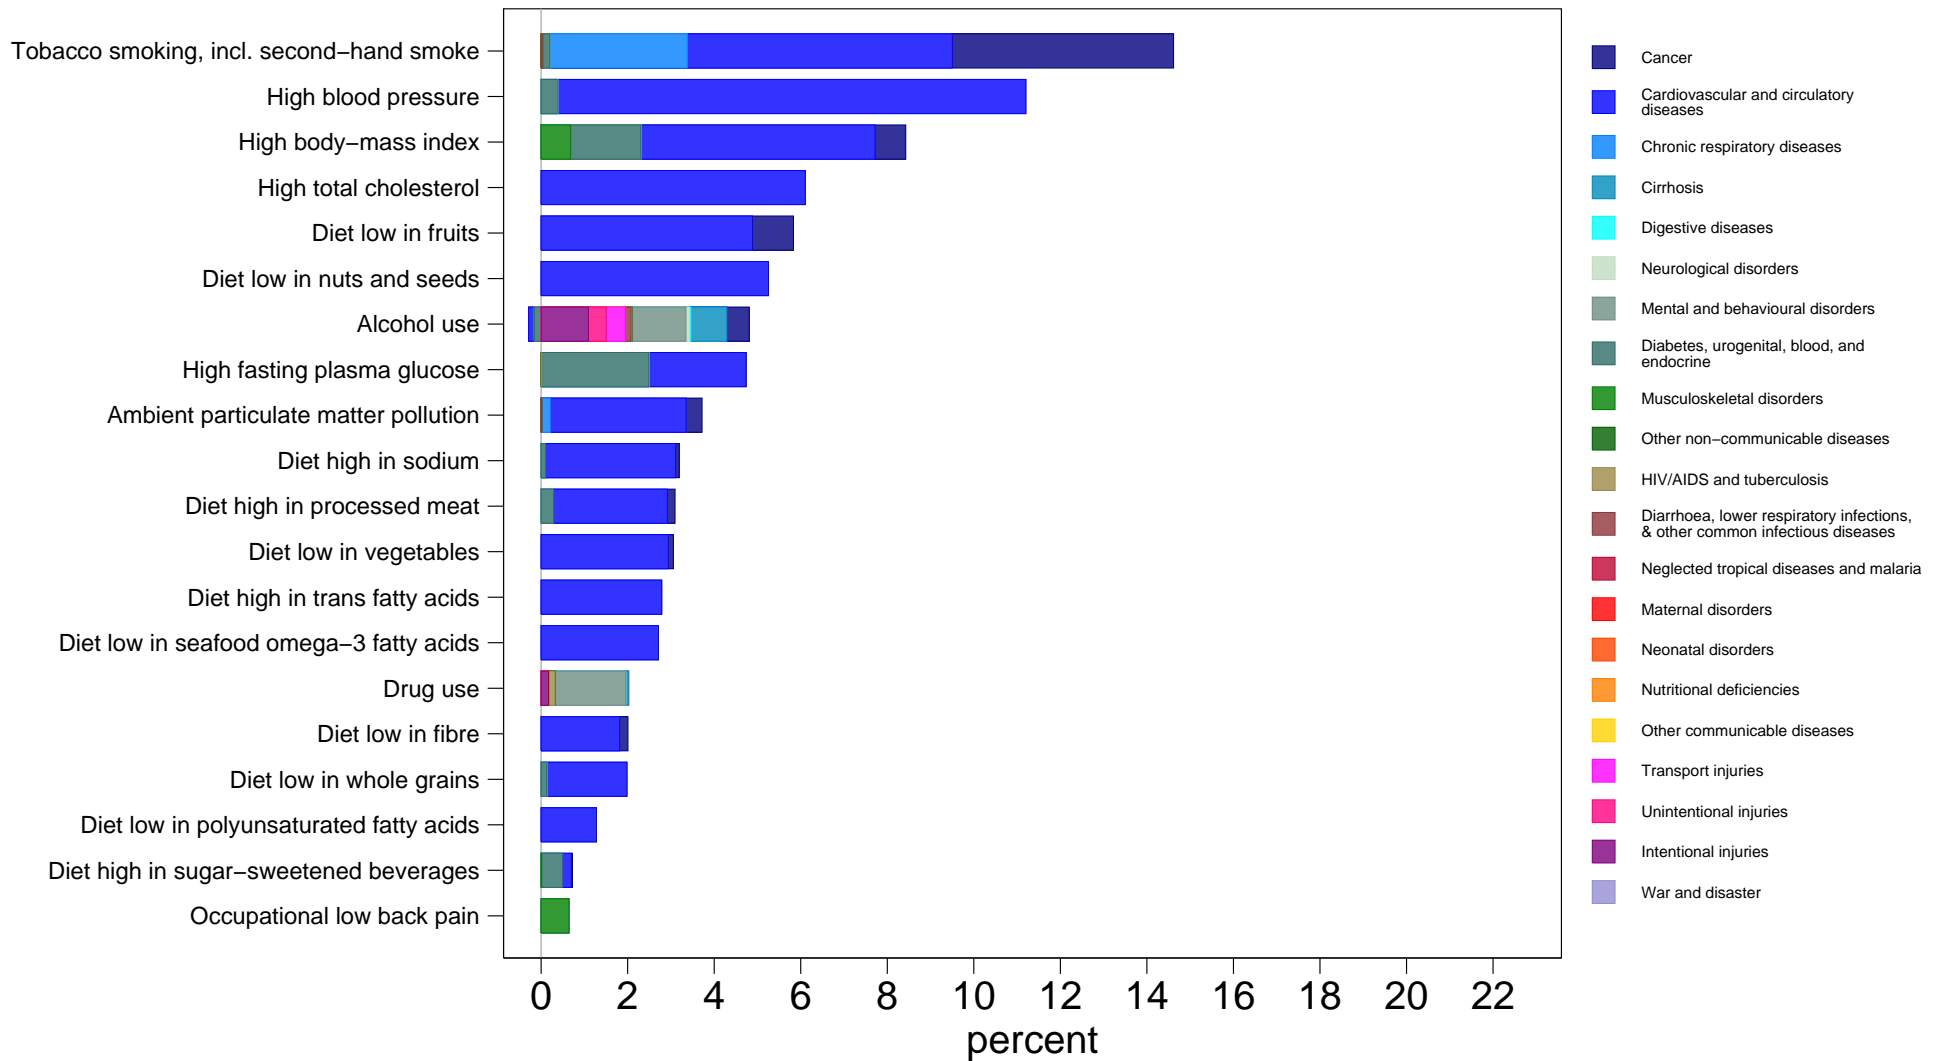



# Web Figure 1: Percent of High-income North America DALYs, 2010

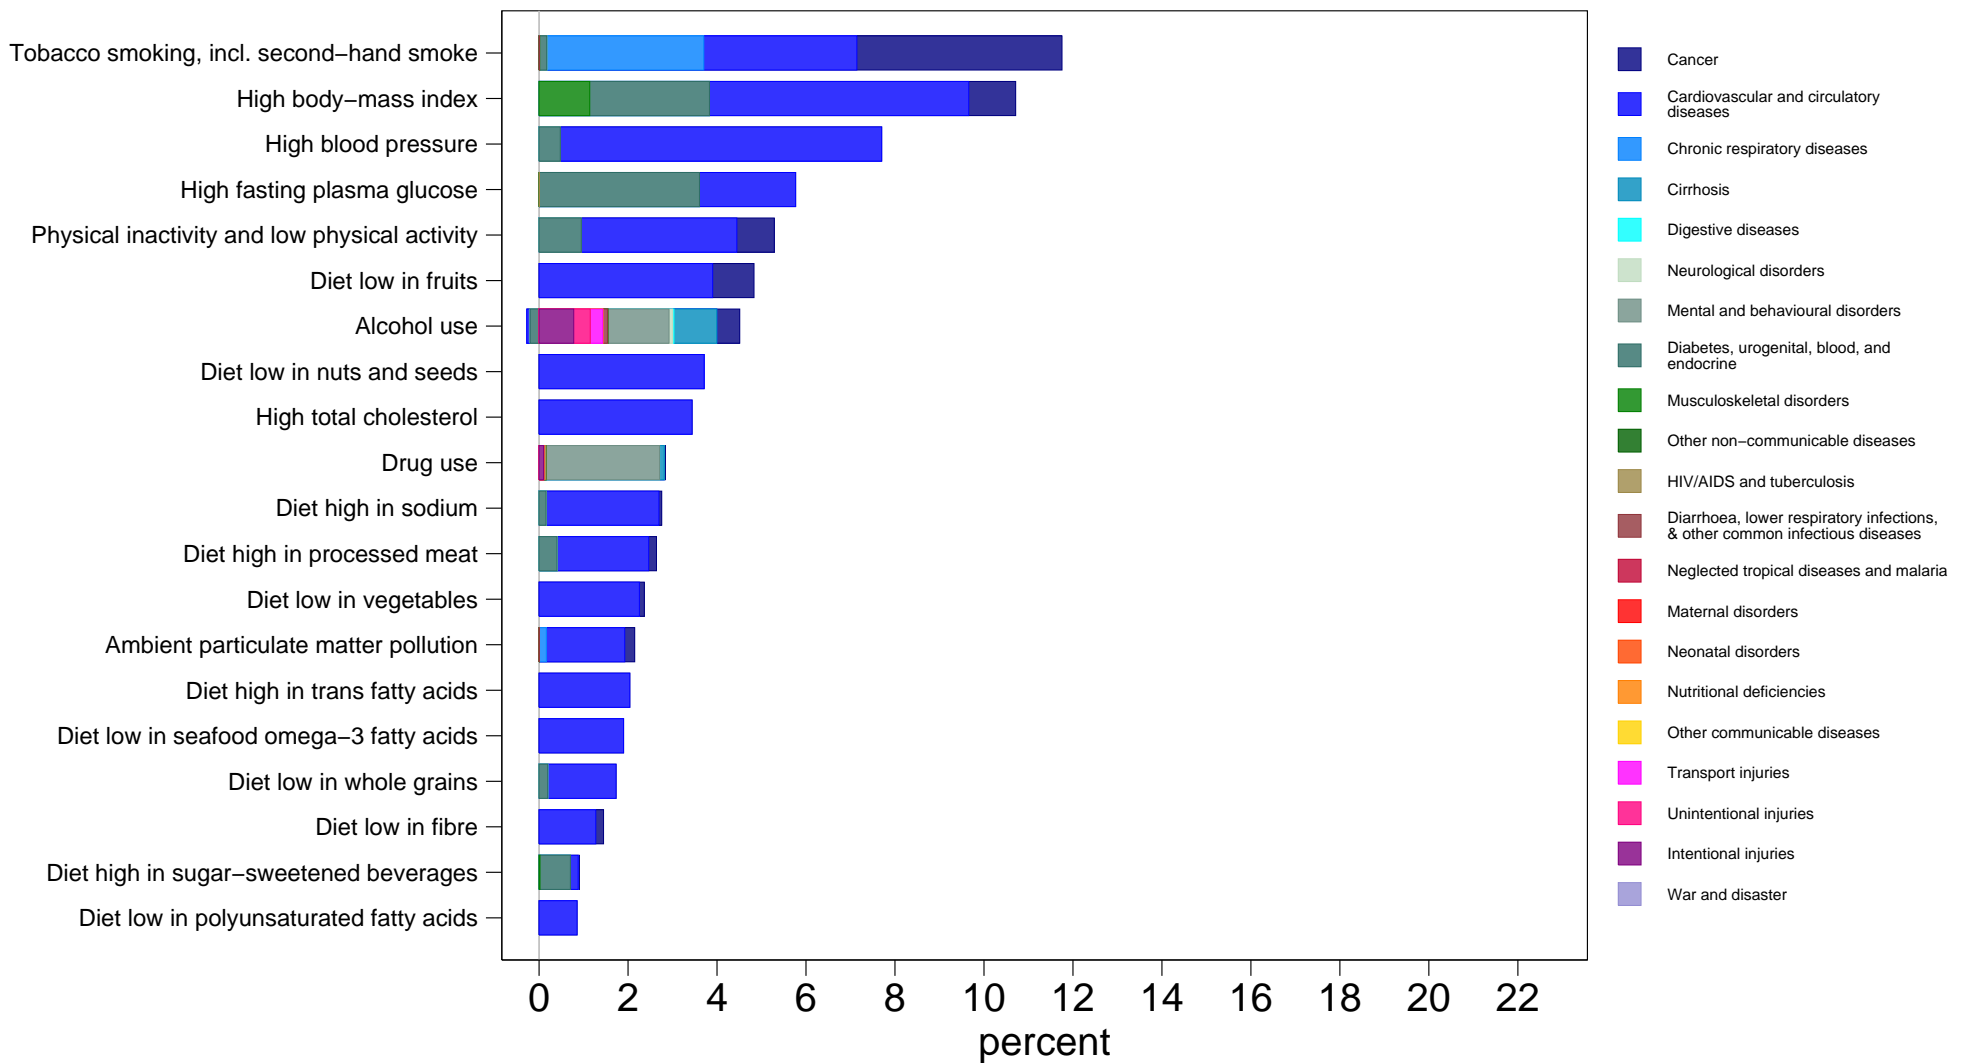

# Web Figure 1: Percent of Oceania DALYs, 1990

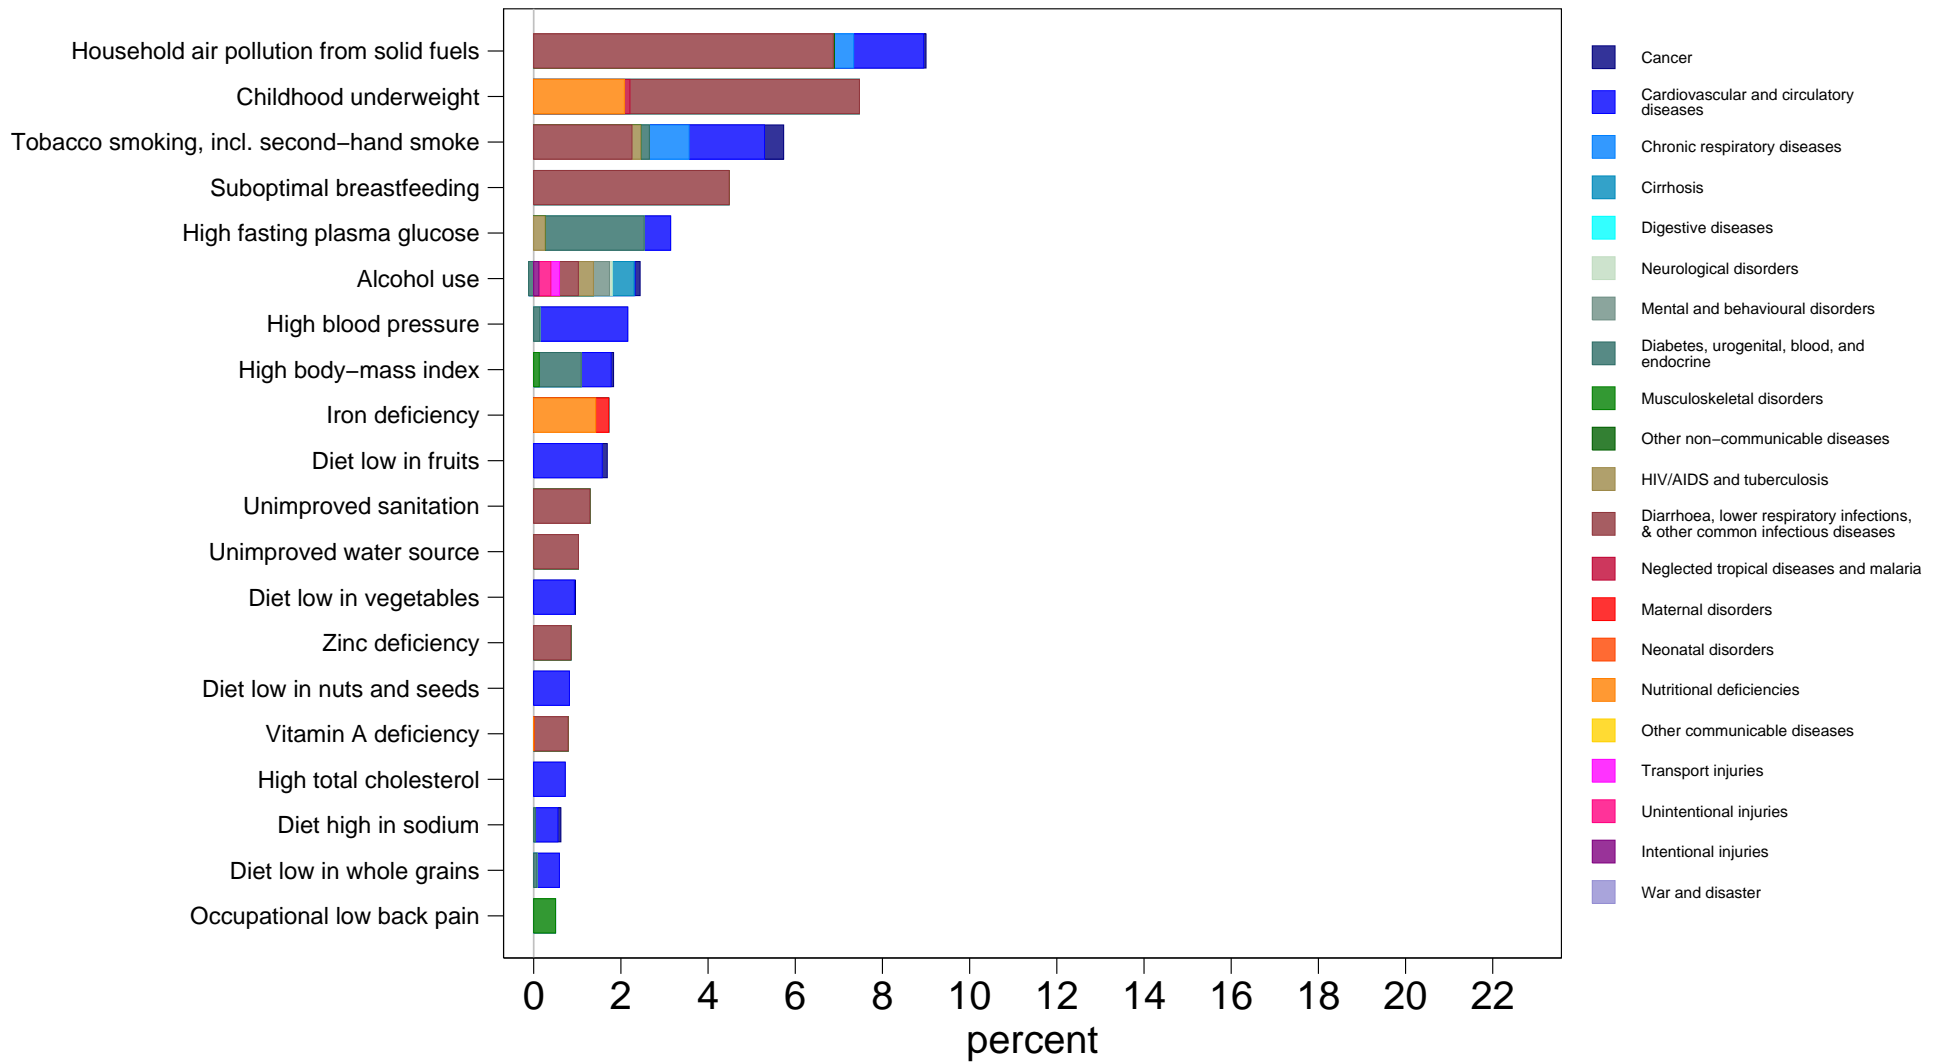

# Web Figure 1: Percent of Oceania DALYs, 2010

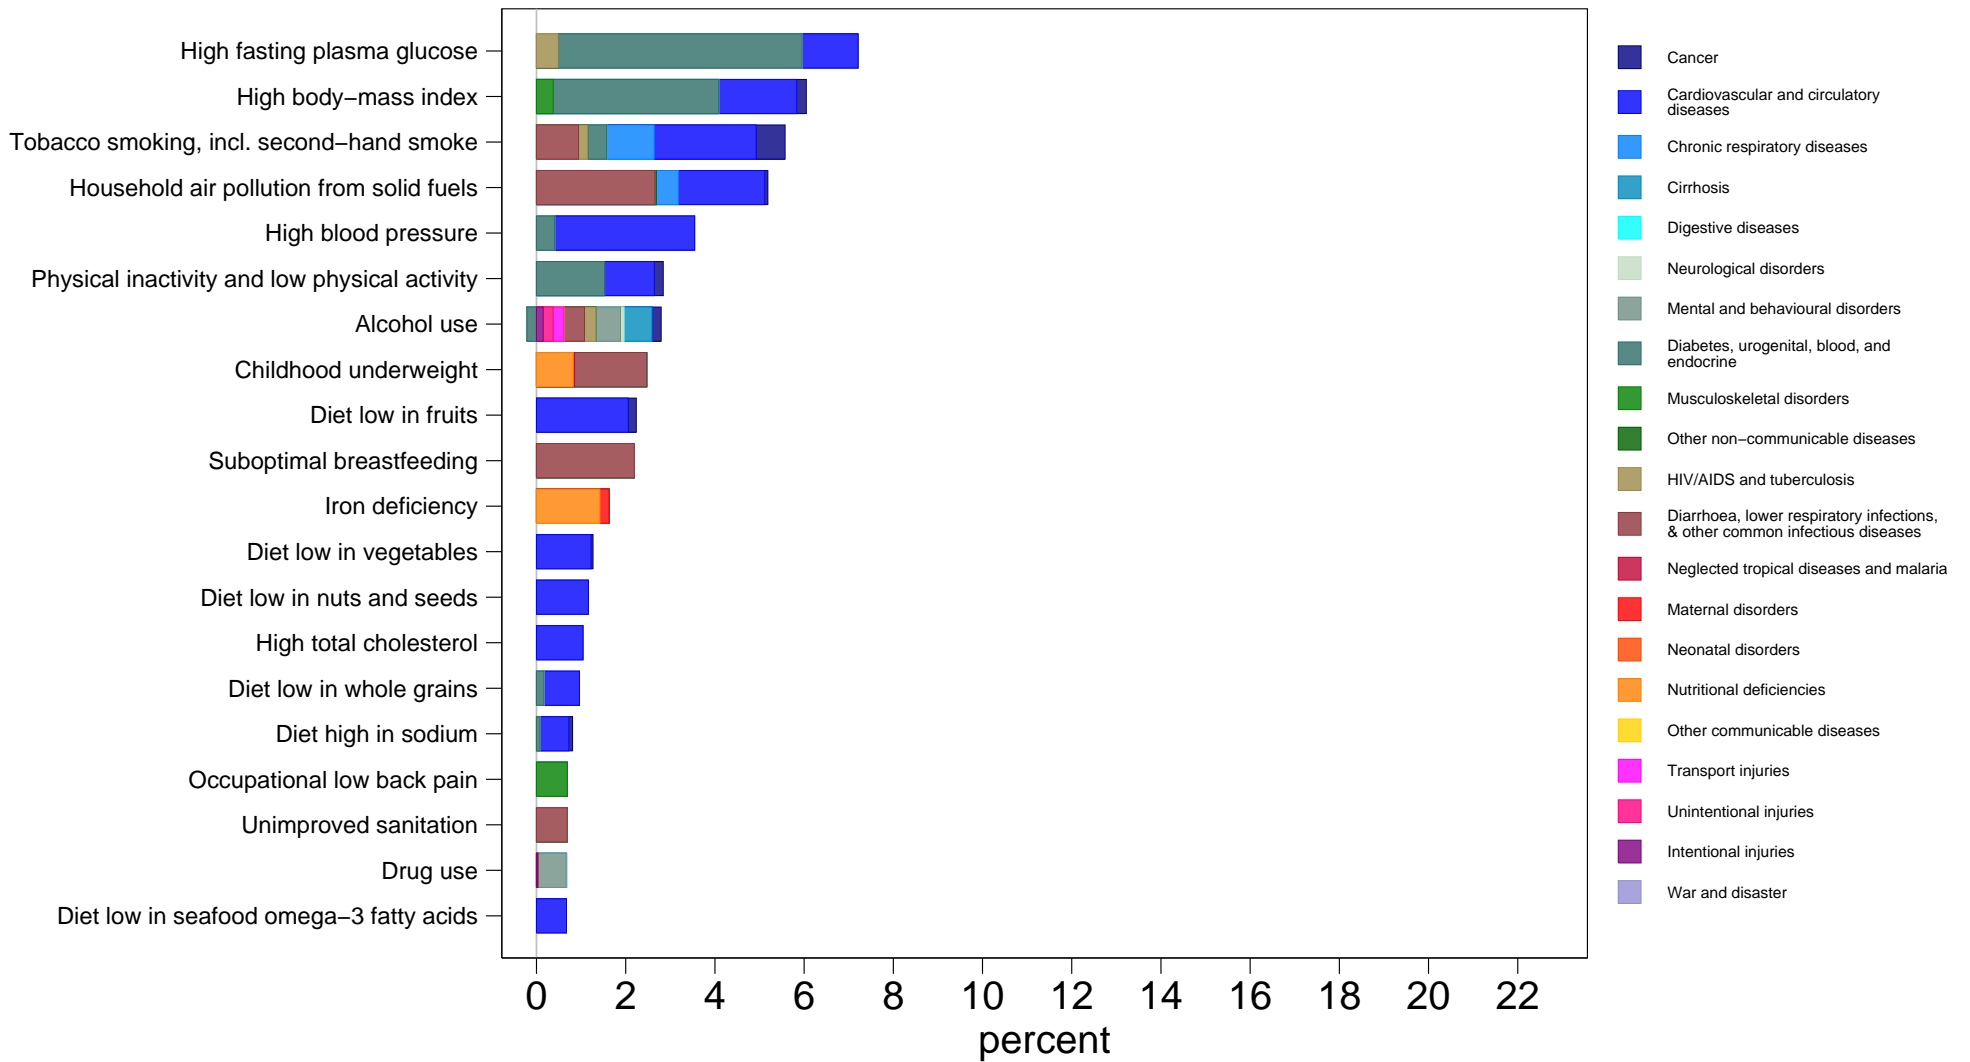

# Web Figure 1: Percent of Central sub-Saharan Africa DALYs, 1990

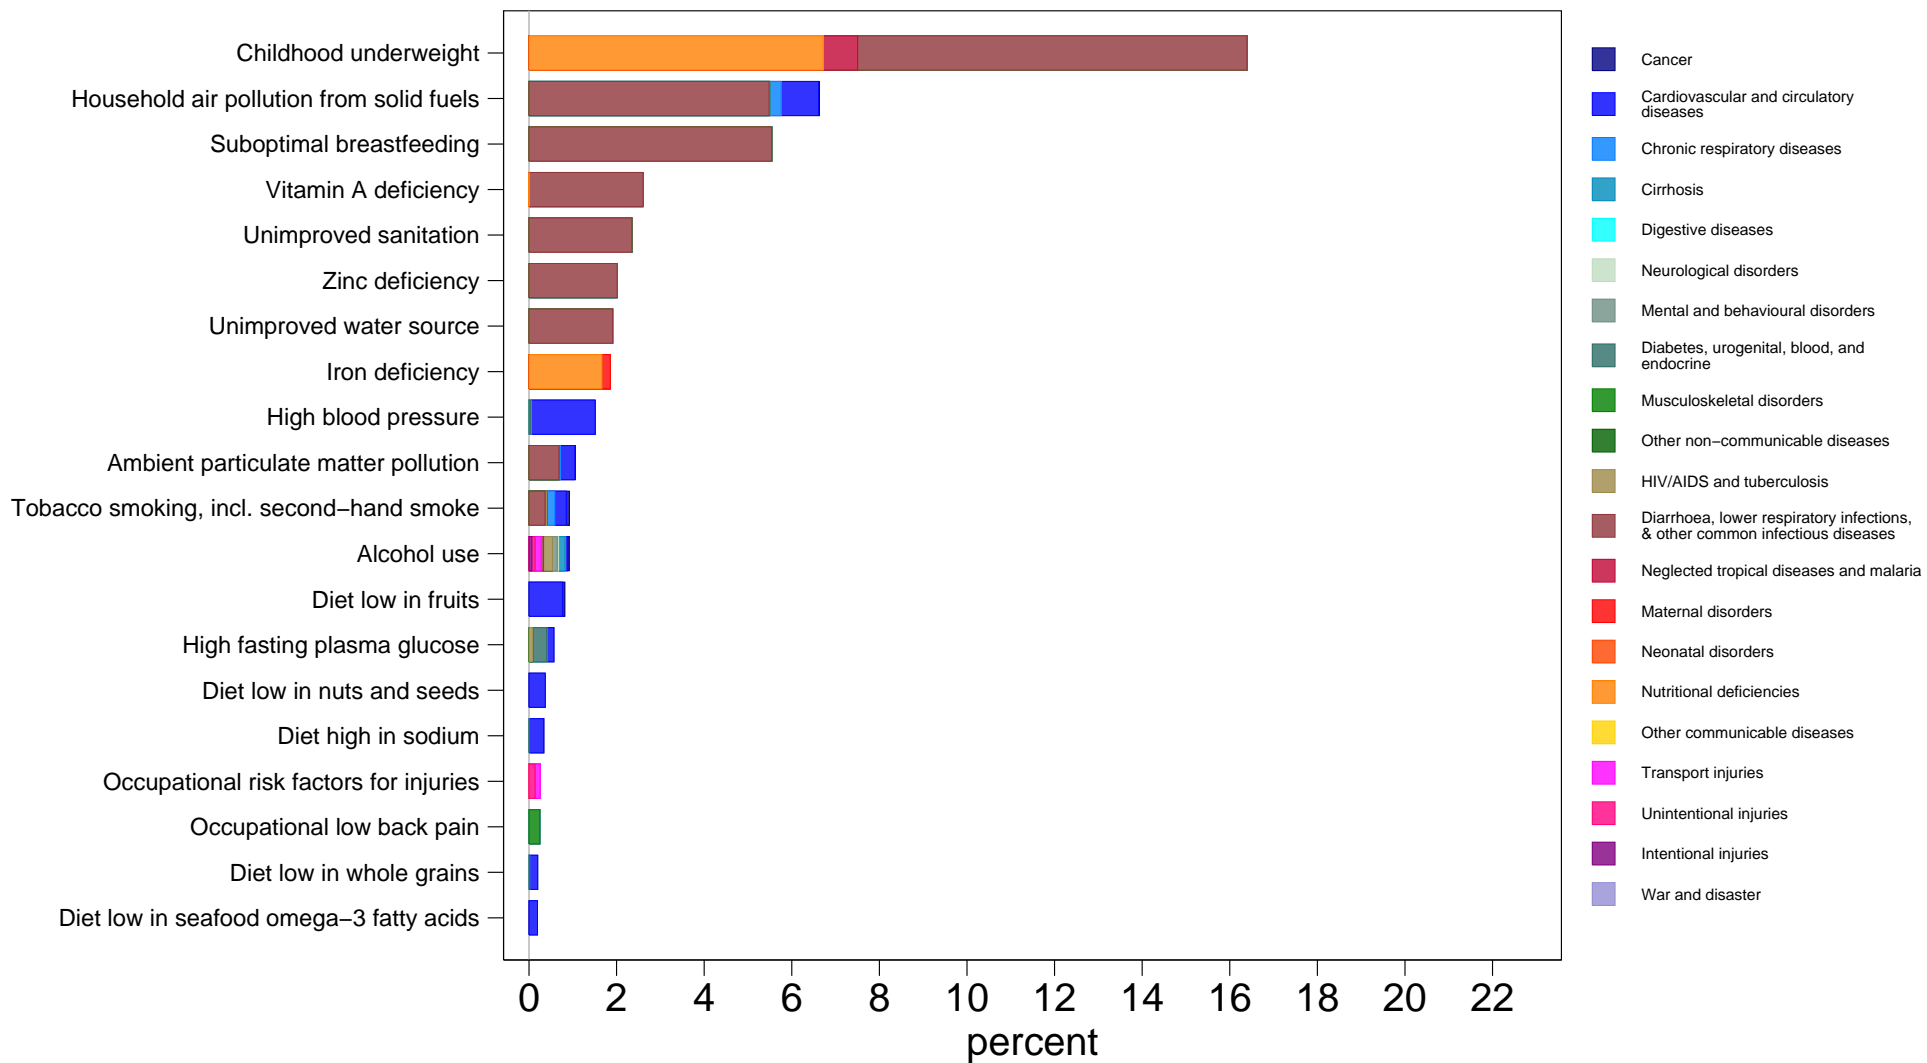

# Web Figure 1: Percent of Central sub-Saharan Africa DALYs, 2010

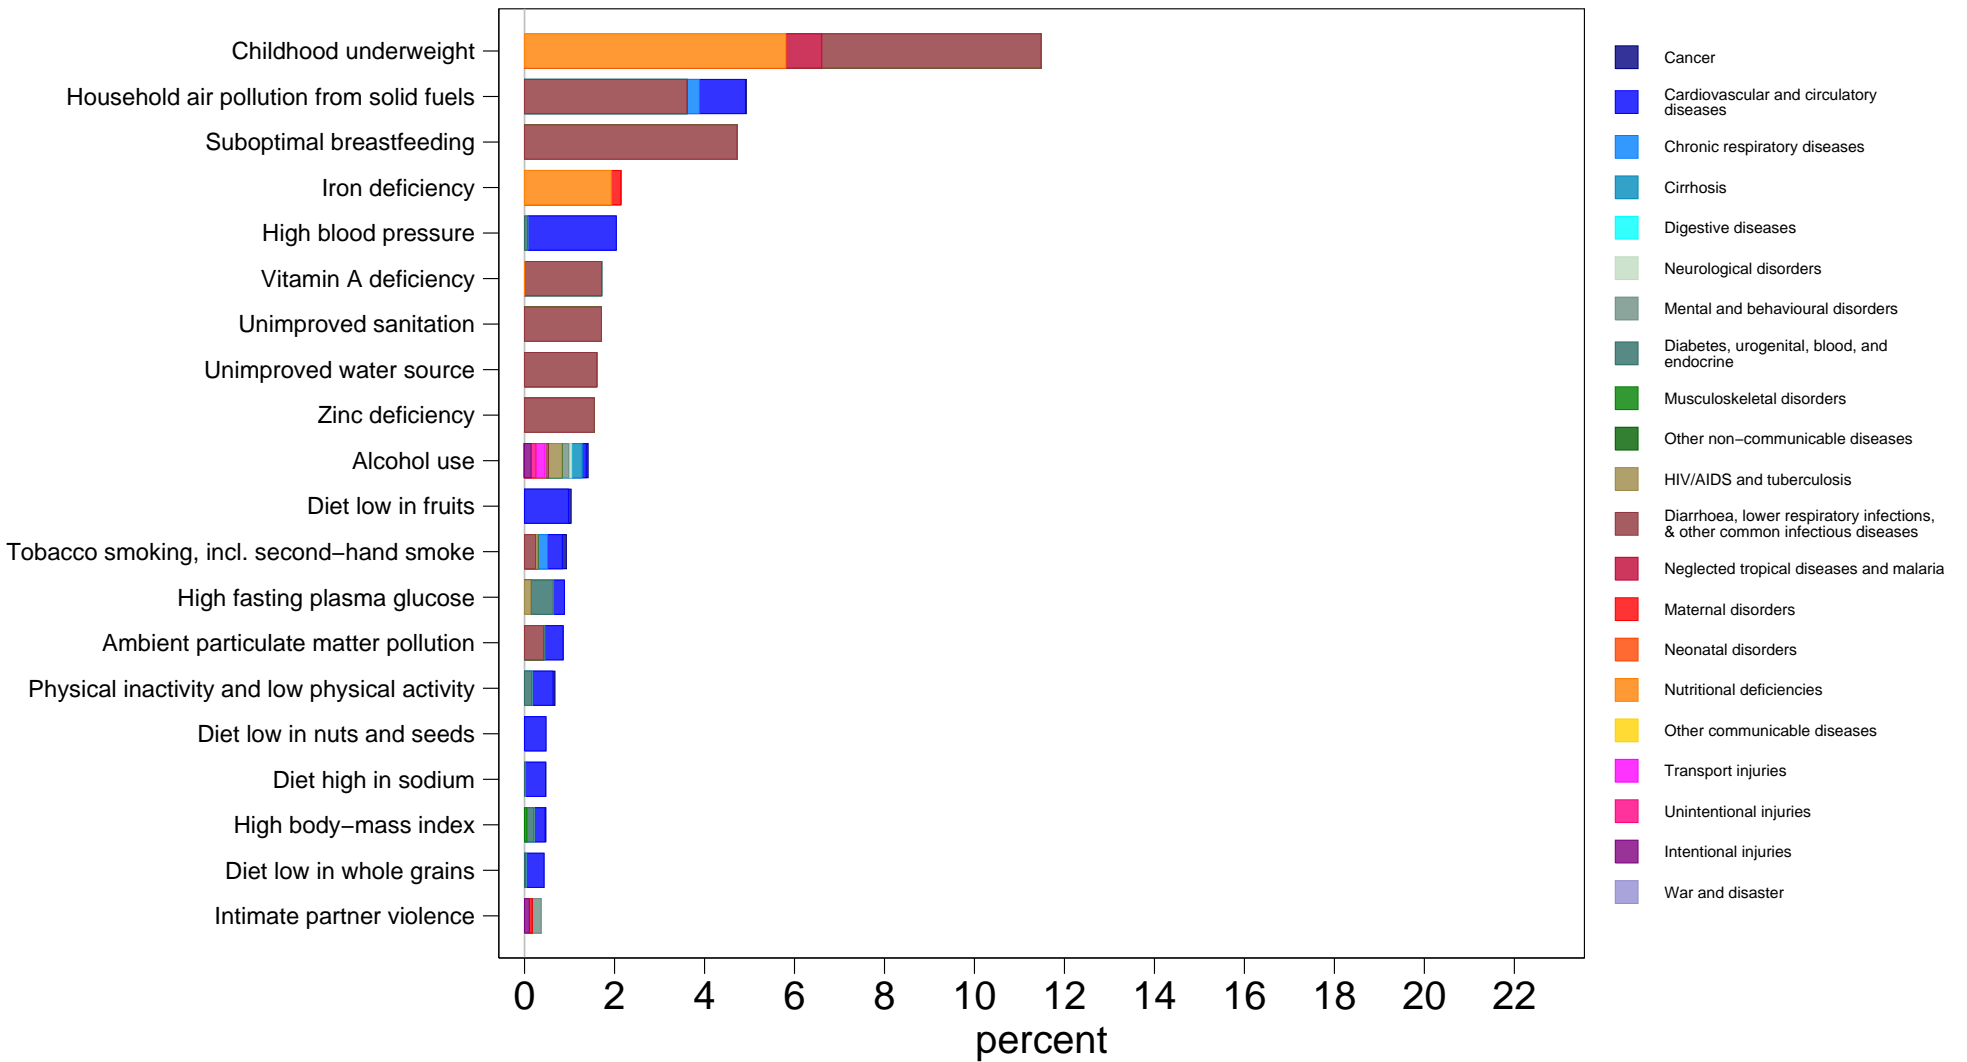

# Web Figure 1: Percent of Eastern sub-Saharan Africa DALYs, 1990

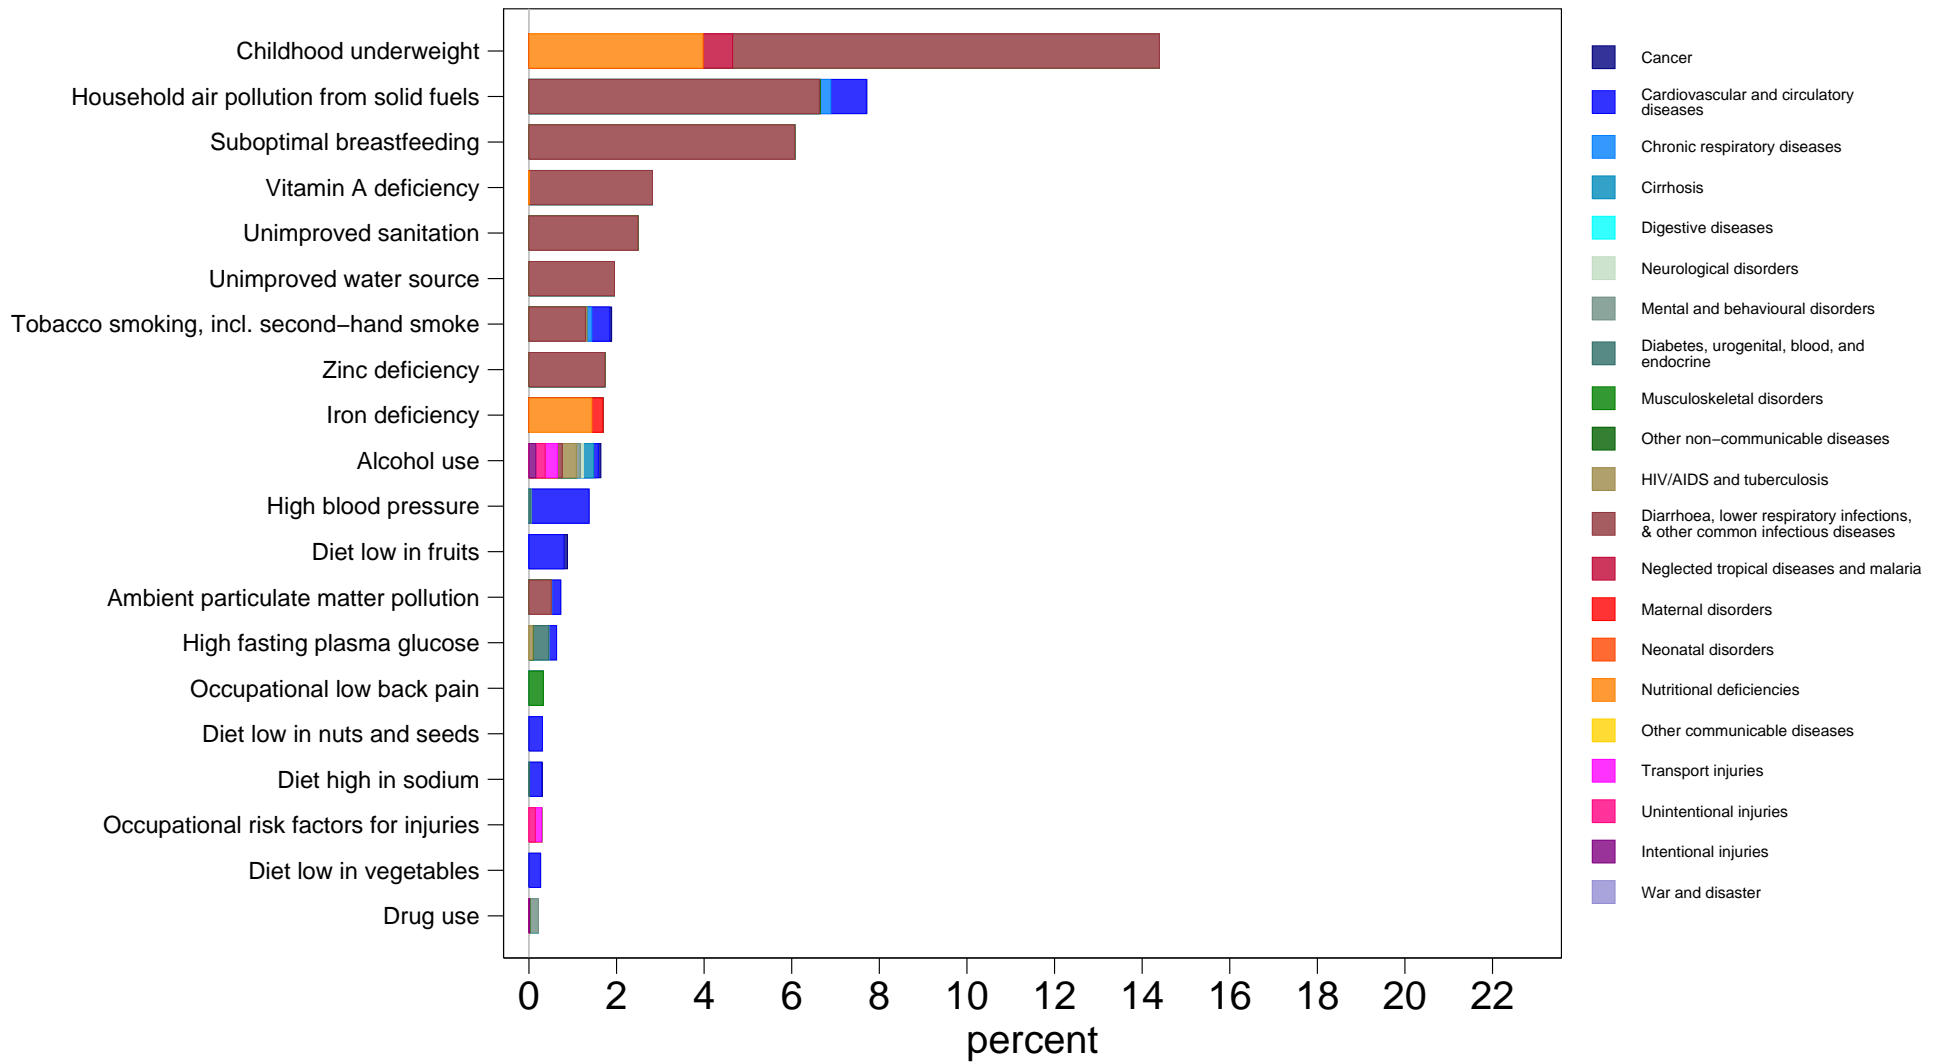

# Web Figure 1: Percent of Eastern sub-Saharan Africa DALYs, 2010

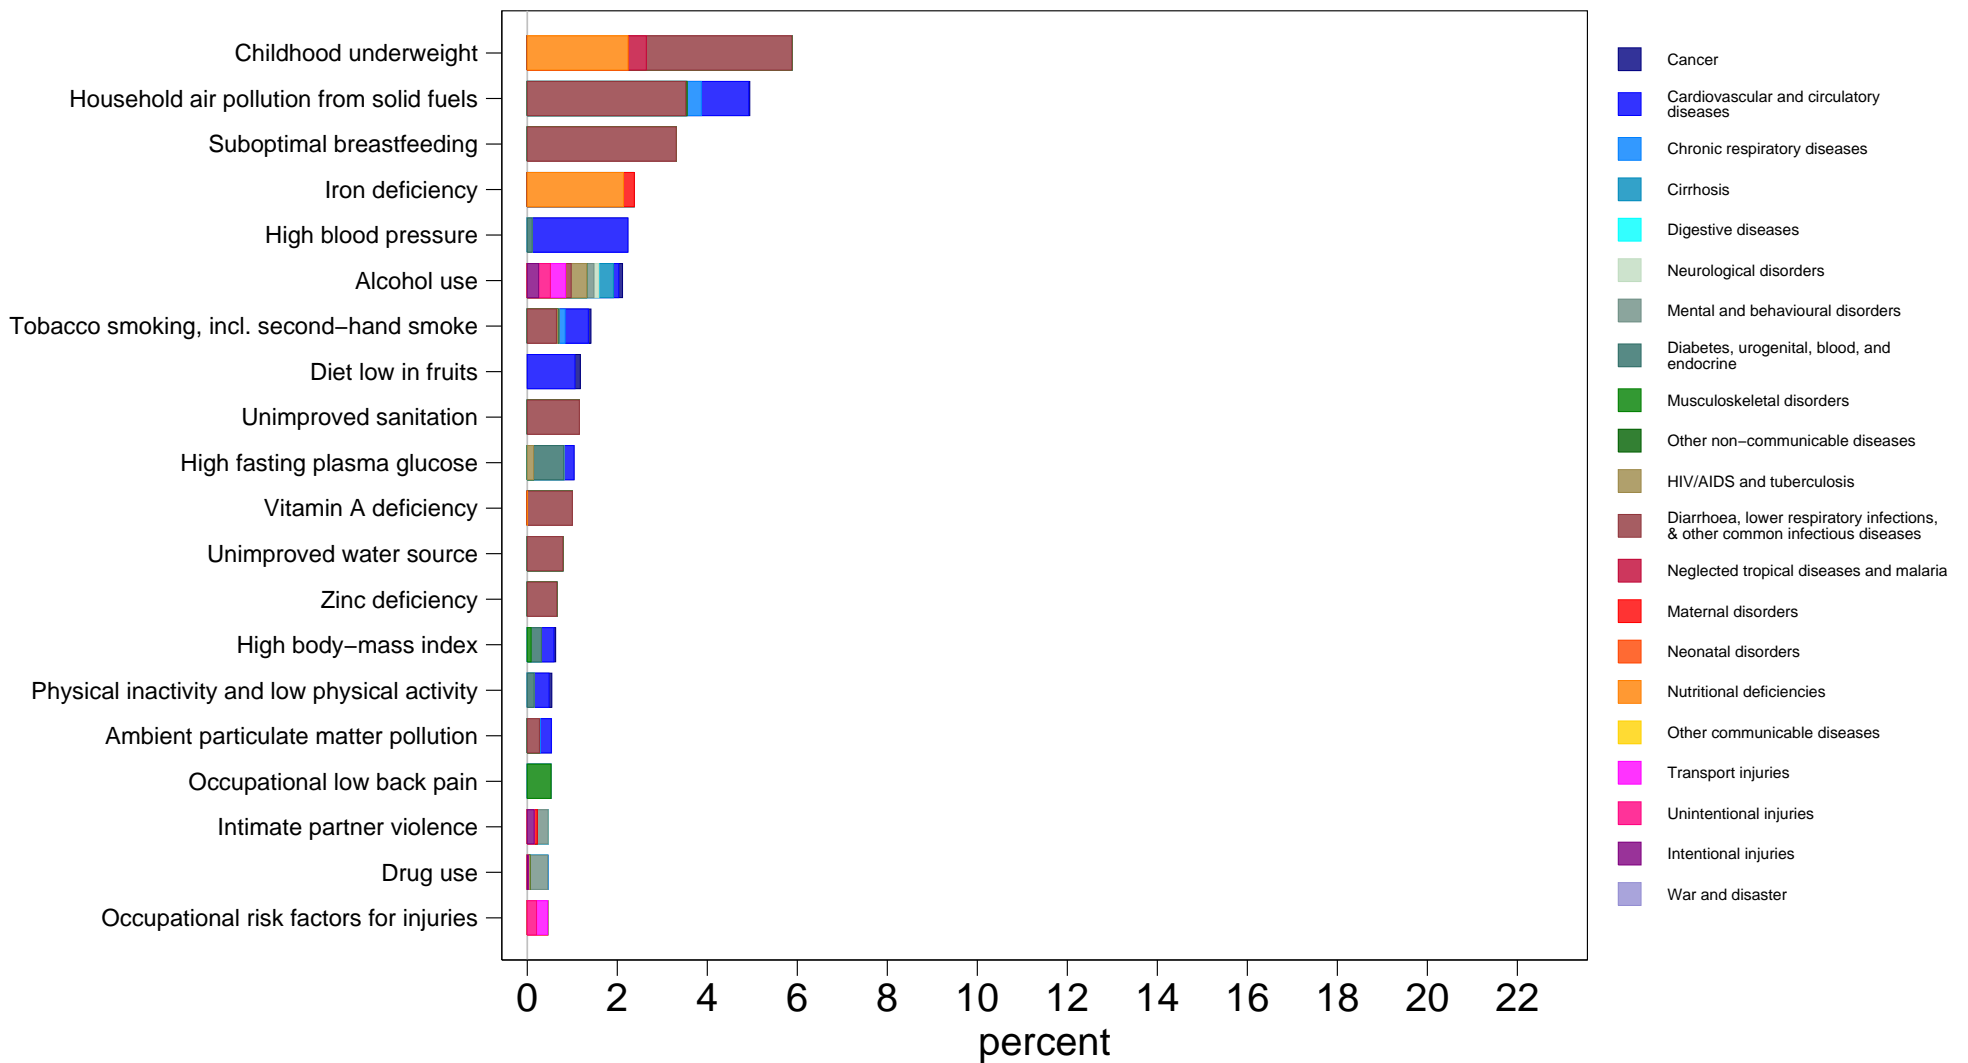

# Web Figure 1: Percent of Southern sub-Saharan Africa DALYs, 1990

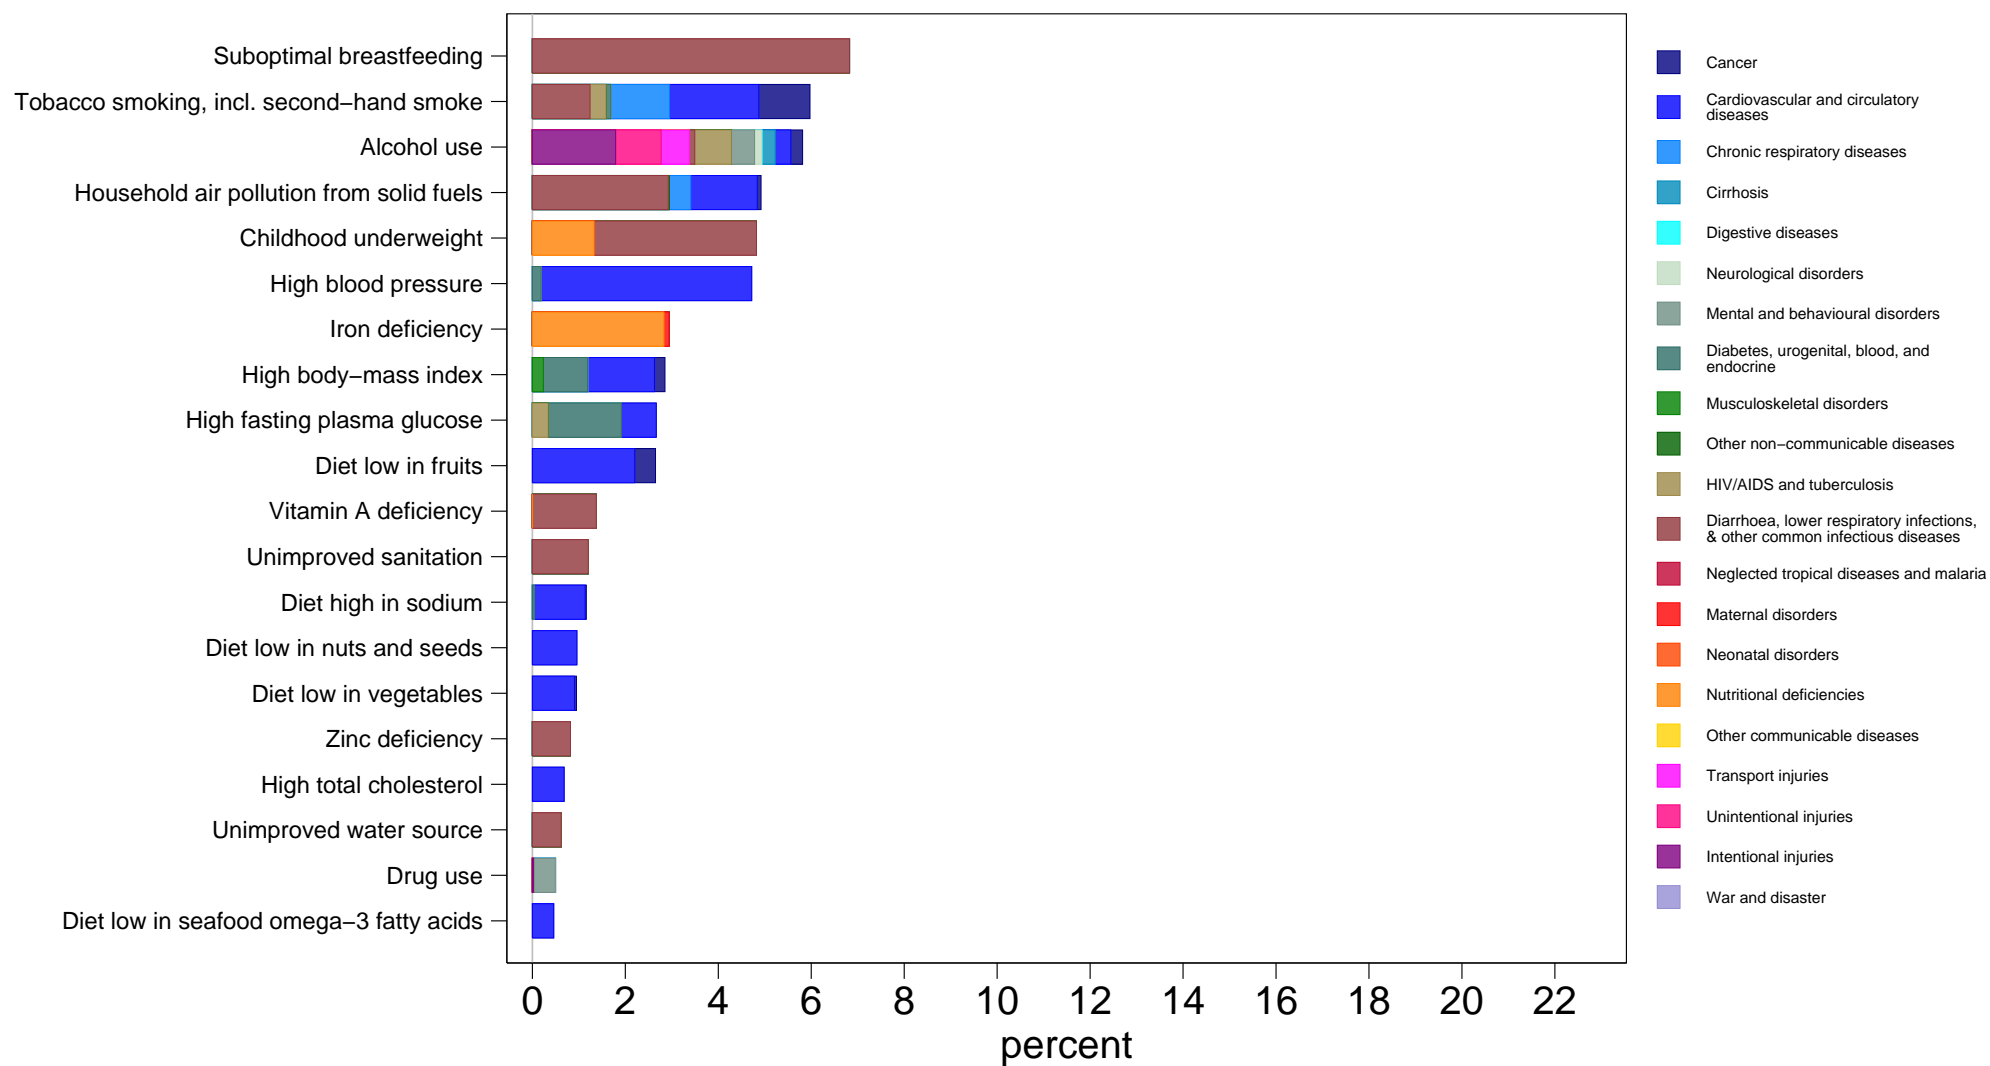



# Web Figure 1: Percent of Southern sub-Saharan Africa DALYs, 2010

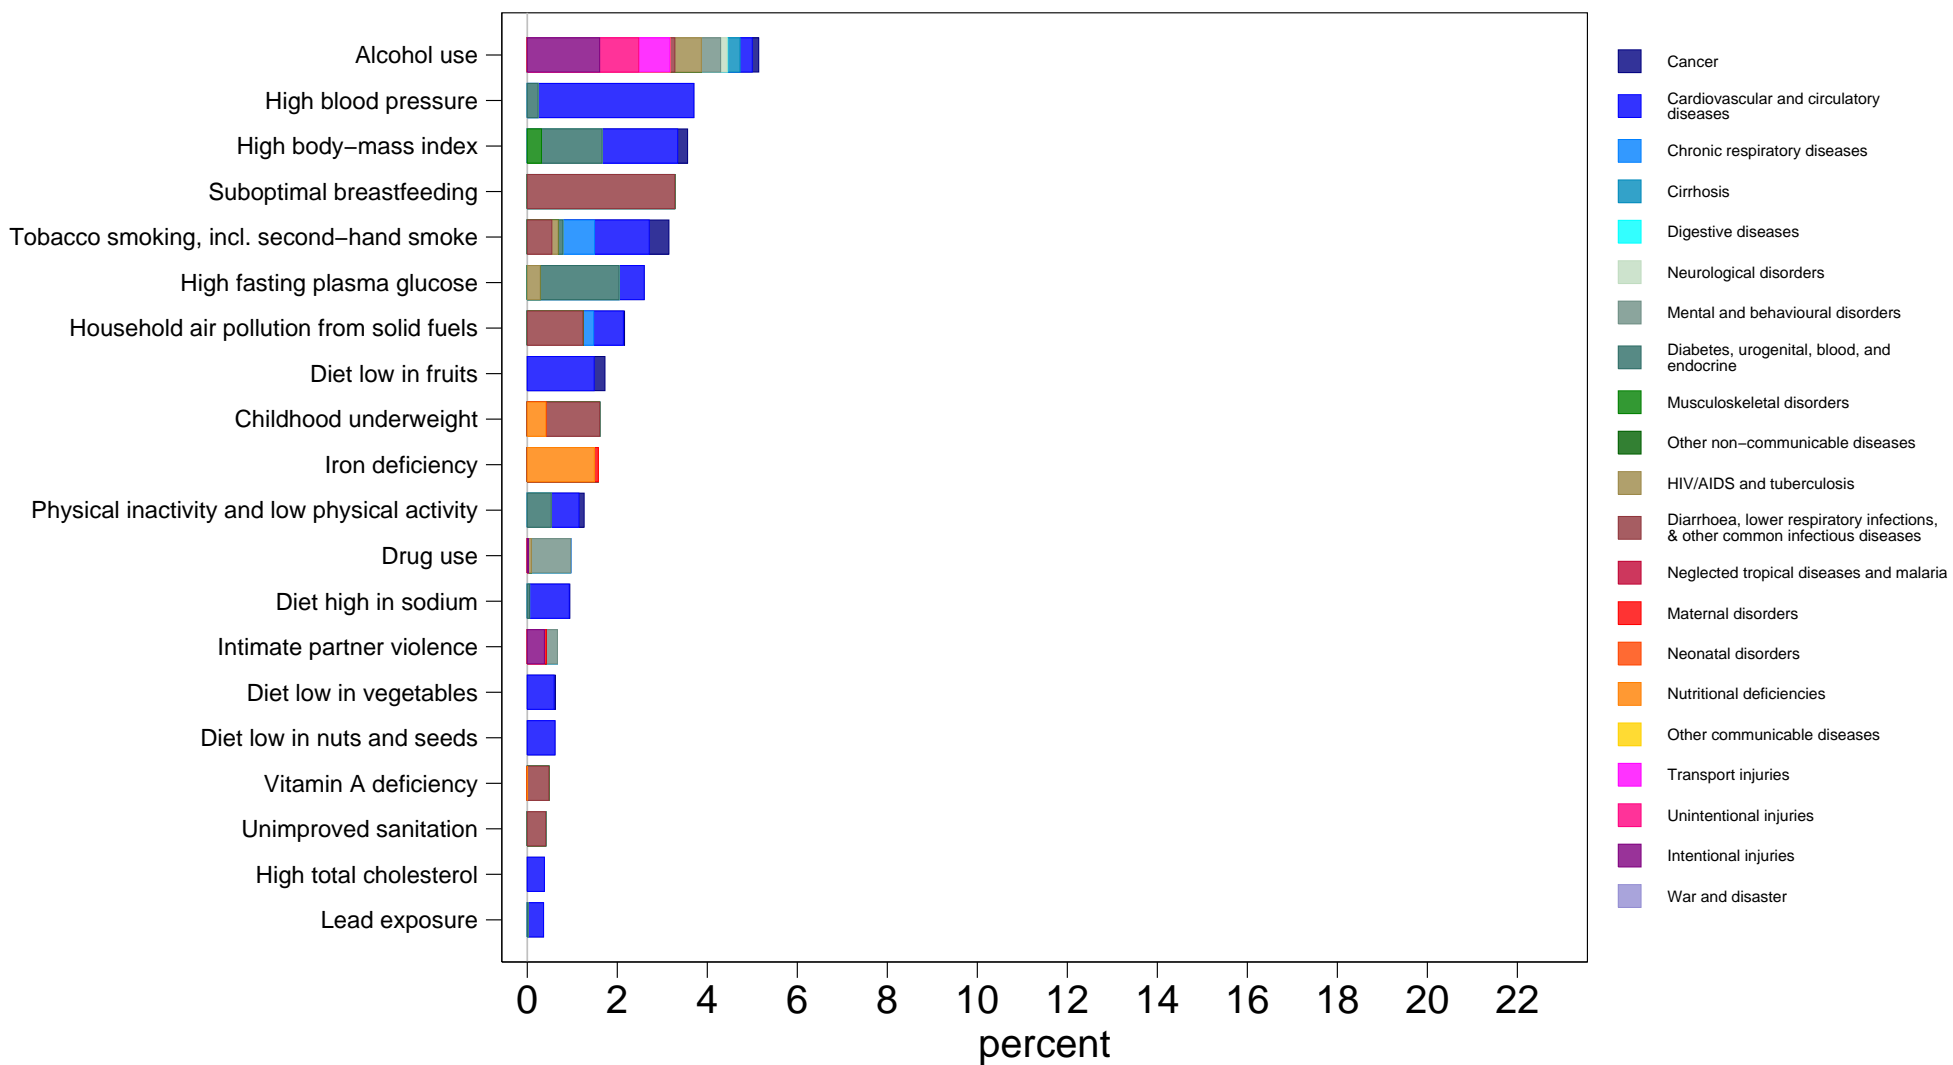

# Web Figure 1: Percent of Western sub-Saharan Africa DALYs, 1990

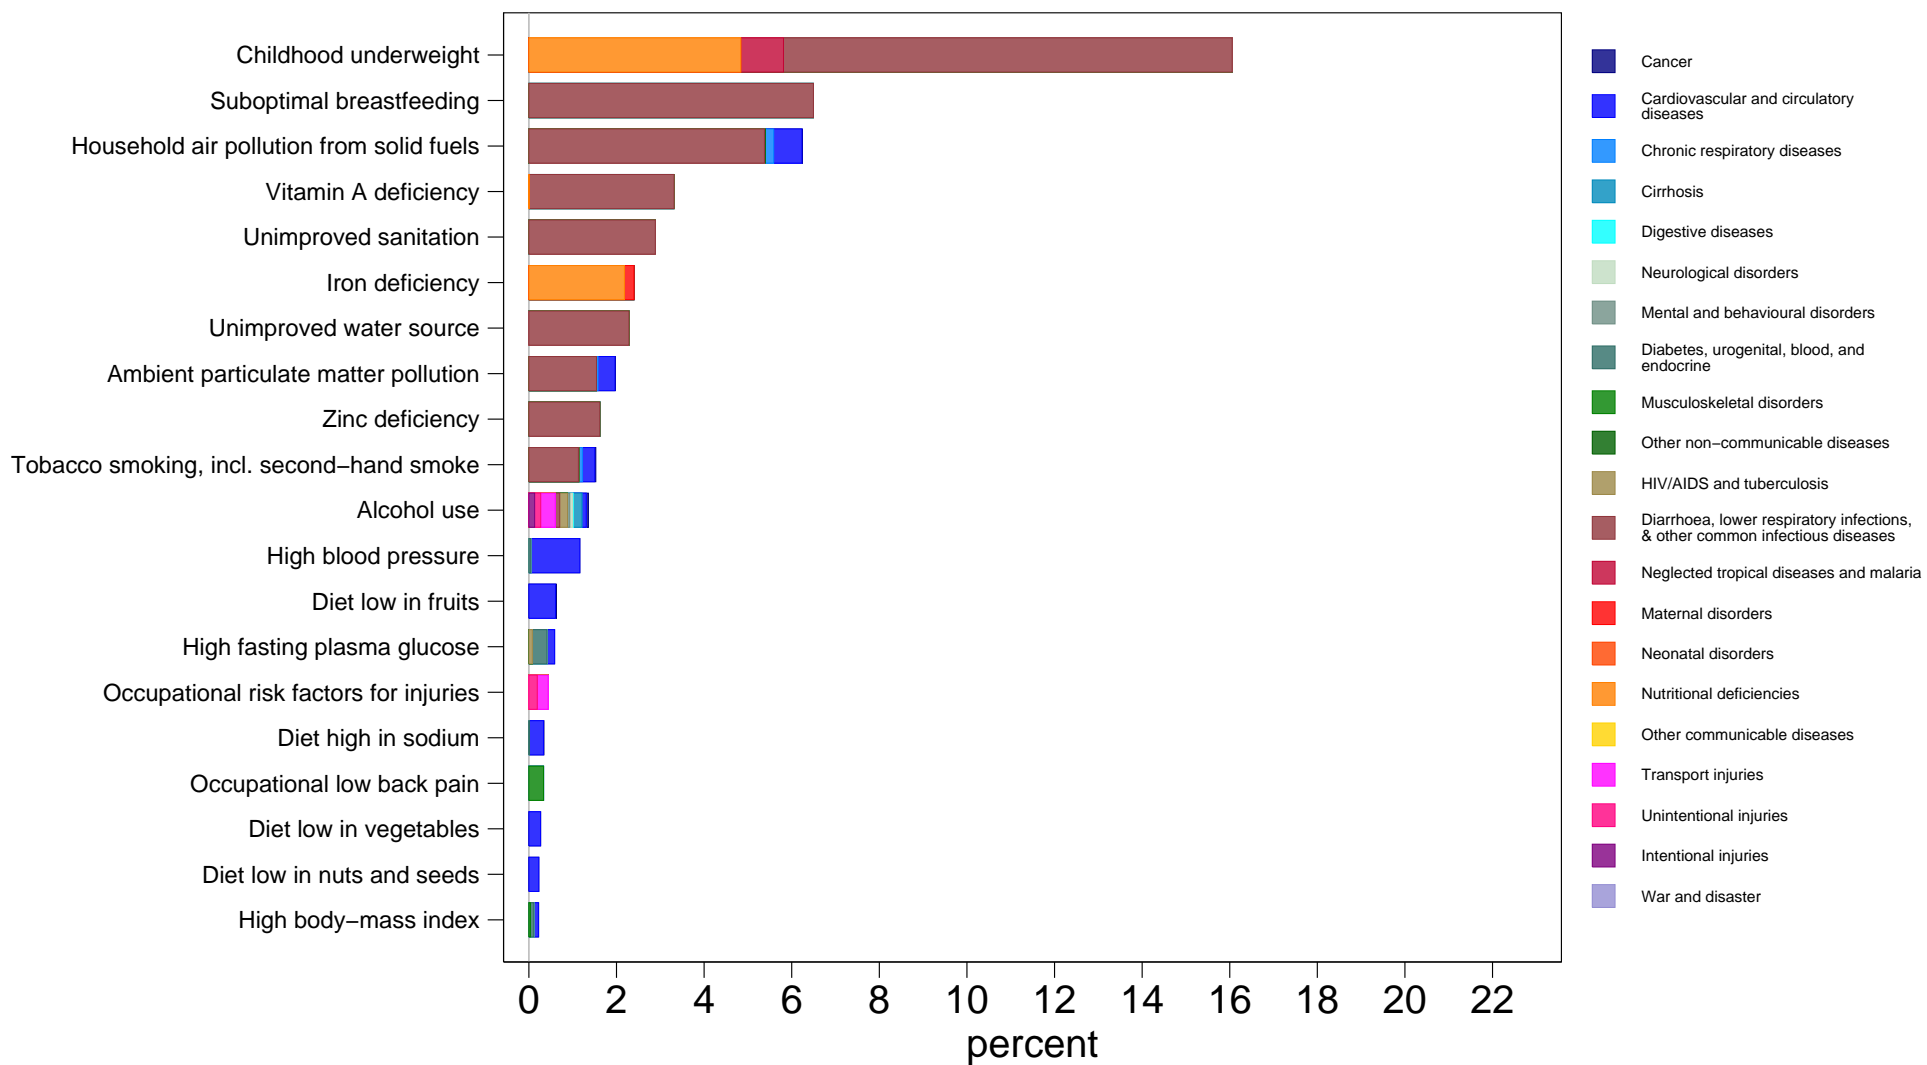

# Web Figure 1: Percent of Western sub-Saharan Africa DALYs, 2010

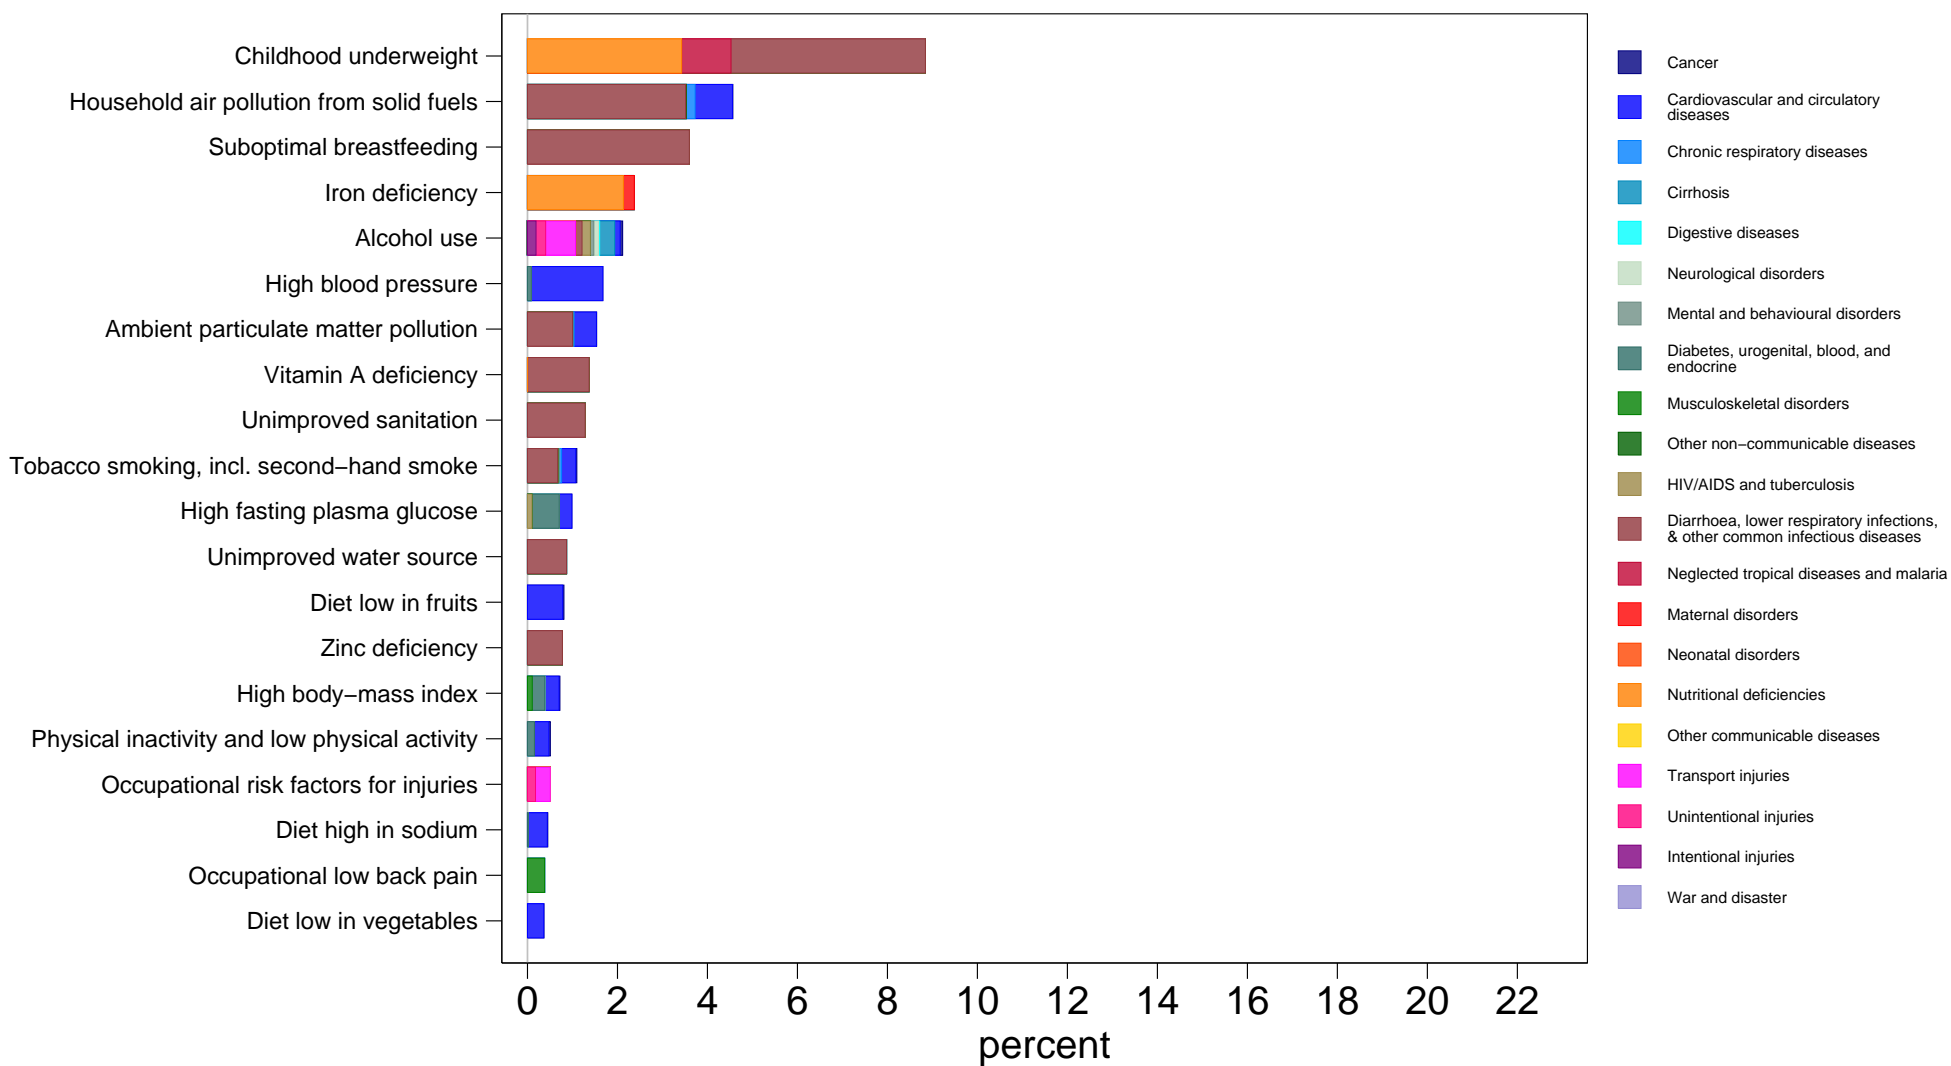

Web figure 2: Risk factors ranked by attributable burden of disease

|                                                   | 1990   |                          |                |             |                           |                |                        |                |           |                        |                       |                |              |                      |                              |           |            |         |                             |                            |                            |                            |
|---------------------------------------------------|--------|--------------------------|----------------|-------------|---------------------------|----------------|------------------------|----------------|-----------|------------------------|-----------------------|----------------|--------------|----------------------|------------------------------|-----------|------------|---------|-----------------------------|----------------------------|----------------------------|----------------------------|
|                                                   | Global | High-income Asia Pacific | Western Europe | Australasia | High-income North America | Central Europe | Southern Latin America | Eastern Europe | East Asia | Tropical Latin America | Central Latin America | Southeast Asia | Central Asia | Andean Latin America | North Africa and Middle East | Caribbean | South Asia | Oceania | Southern sub-Saharan Africa | Eastern sub-Saharan Africa | Central sub-Saharan Africa | Western sub-Saharan Africa |
| Childhood underweight                             | 1      | 36                       | 34             | 33          | 35                        | 28             | 23                     | 32             | 11        | 15                     | 3                     | 2              | 9            | 3                    | 4                            | 4         | 1          | 2       | 5                           | 1                          | 1                          | 1                          |
| Household air pollution from solid fuels          | 2      | 18                       |                |             |                           | 6              | 10                     | 14             | 1         | 7                      | 6                     | 1              | 1            | 2                    | 9                            | 6         | 2          | 1       | 4                           | 2                          | 2                          | 3                          |
| Tobacco smoking, including second-hand smoke      | 3      | 2                        | 2              | 2           | 1                         | 2              | 1                      | 3              | 2         | 3                      | 4                     | 3              | 2            | 4                    | 3                            | 5         | 4          | 3       | 2                           | 7                          | 11                         | 10                         |
| High blood pressure                               | 4      | 1                        | 1              | 1           | 2                         | 1              | 2                      | 1              | 3         | 1                      | 5                     | 5              | 3            | 6                    | 1                            | 2         | 7          | 7       | 6                           | 11                         | 9                          | 12                         |
| Suboptimal breastfeeding                          | 5      |                          |                |             |                           |                | 18                     |                | 8         | 2                      | 1                     | 4              | 4            | 1                    | 2                            | 1         | 3          | 4       | 1                           | 3                          | 3                          | 2                          |
| Ambient particulate matter pollution              | 6      | 6                        | 9              | 21          | 9                         | 5              | 21                     | 8              | 4         | 29                     | 12                    | 9              | 5            | 22                   | 5                            | 21        | 6          | 30      | 23                          | 13                         | 10                         | 8                          |
| Diet low in fruits                                | 7      | 3                        | 5              | 6           | 5                         | 4              | 5                      | 5              | 5         | 5                      | 10                    | 6              | 6            | 12                   | 7                            | 8         | 9          | 10      | 10                          | 12                         | 13                         | 13                         |
| Alcohol use                                       | 8      | 7                        | 7              | 8           | 8                         | 7              | 4                      | 2              | 6         | 4                      | 2                     | 11             | 16           | 7                    | 18                           | 10        | 11         | 6       | 3                           | 10                         | 12                         | 11                         |
| High fasting plasma glucose                       | 9      | 5                        | 8              | 7           | 7                         | 10             | 6                      | 9              | 9         | 8                      | 7                     | 8              | 12           | 10                   | 8                            | 7         | 12         | 5       | 9                           | 14                         | 14                         | 14                         |
| Iron deficiency                                   | 10     | 19                       | 28             | 20          | 32                        | 20             | 14                     | 18             | 16        | 13                     | 9                     | 7              | 15           | 5                    | 10                           | 3         | 5          | 9       | 7                           | 9                          | 8                          | 6                          |
| High body-mass index                              | 11     | 9                        | 3              | 3           | 3                         | 3              | 3                      | 4              | 12        | 6                      | 8                     | 23             | 7            | 9                    | 6                            | 9         | 26         | 8       | 8                           | 22                         | 23                         | 20                         |
| Diet high in sodium                               | 12     | 4                        | 10             | 9           | 10                        | 11             | 12                     | 10             | 7         | 10                     | 16                    | 10             | 8            | 17                   | 12                           | 18        | 16         | 18      | 13                          | 17                         | 16                         | 16                         |
| Diet low in nuts and seeds                        | 13     | 10                       | 6              | 5           | 6                         | 9              | 8                      | 7              | 14        | 11                     | 11                    | 16             | 10           | 15                   | 11                           | 11        | 15         | 15      | 14                          | 16                         | 15                         | 19                         |
| High total cholesterol                            | 14     | 11                       | 4              | 4           | 4                         | 8              | 7                      | 6              | 21        | 14                     | 13                    | 19             | 11           | 19                   | 13                           | 16        | 19         | 17      | 17                          | 24                         | 22                         | 24                         |
| Unimproved sanitation                             | 15     | 33                       | 35             | 35          | 37                        | 38             | 36                     | 36             | 24        | 21                     | 21                    | 14             | 25           | 11                   | 19                           | 13        | 8          | 11      | 12                          | 5                          | 5                          | 5                          |
| Diet low in vegetables                            | 16     | 13                       | 11             | 10          | 12                        | 14             | 9                      | 11             | 15        | 20                     | 24                    | 12             | 13           | 18                   | 16                           | 12        | 18         | 13      | 15                          | 19                         | 21                         | 18                         |
| Vitamin A deficiency                              | 17     | 37                       | 36             | 34          | 36                        | 37             | 38                     | 37             | 32        | 27                     | 19                    | 17             | 26           | 13                   | 27                           | 22        | 10         | 16      | 11                          | 4                          | 4                          | 4                          |
| Diet low in whole grains                          | 18     | 8                        | 14             | 17          | 17                        | 13             | 11                     | 12             | 10        | 12                     | 14                    | 26             | 14           | 21                   | 14                           | 14        | 20         | 19      | 29                          | 21                         | 19                         | 22                         |
| Zinc deficiency                                   | 19     | 34                       | 33             | 32          | 33                        | 35             | 37                     | 35             | 23        | 28                     | 17                    | 13             | 18           | 8                    | 26                           | 15        | 13         | 14      | 16                          | 8                          | 6                          | 9                          |
| Diet low in seafood omega-3 fatty acids           | 20     | 16                       | 13             | 11          | 14                        | 15             | 13                     | 13             | 22        | 17                     | 22                    | 20             | 17           | 24                   | 15                           | 19        | 21         | 21      | 20                          | 23                         | 20                         | 23                         |
| Occupational risk factors for injuries            | 21     | 15                       | 18             | 16          | 21                        | 19             | 15                     | 22             | 17        | 19                     | 20                    | 21             | 22           | 23                   | 21                           | 29        | 14         | 24      | 21                          | 18                         | 17                         | 15                         |
| Unimproved water source                           | 22     | 38                       | 37             | 36          | 34                        | 36             | 34                     | 38             | 30        | 25                     | 27                    | 15             | 28           | 14                   | 25                           | 17        | 17         | 12      | 18                          | 6                          | 7                          | 7                          |
| Occupational low back pain                        | 23     | 14                       | 19             | 18          | 20                        | 18             | 22                     | 20             | 13        | 18                     | 26                    | 18             | 24           | 25                   | 17                           | 27        | 22         | 20      | 22                          | 15                         | 18                         | 17                         |
| Diet high in processed meat                       | 24     | 21                       | 12             | 13          | 11                        | 12             | 19                     | 15             | 35        | 9                      | 15                    | 27             | 20           | 20                   | 28                           | 26        | 25         | 27      | 26                          | 29                         | 26                         | 26                         |
| Drug use                                          | 25     | 12                       | 15             | 12          | 15                        | 22             | 16                     | 19             | 20        | 16                     | 18                    | 22             | 23           | 16                   | 22                           | 20        | 24         | 23      | 19                          | 20                         | 24                         | 21                         |
| Diet low in fibre                                 | 26     | 17                       | 16             | 15          | 16                        | 16             | 17                     | 16             | 19        | 24                     | 29                    | 24             | 19           | 28                   | 23                           | 24        | 28         | 22      | 30                          | 32                         | 32                         | 33                         |
| Diet low in polyunsaturated fatty acids           | 27     | 20                       | 17             | 14          | 18                        | 17             | 20                     | 17             | 28        | 23                     | 28                    | 25             | 21           | 29                   | 24                           | 25        | 30         | 25      | 25                          | 28                         | 27                         | 27                         |
| Occupational particulate matter, gases, and fumes | 28     | 30                       | 29             | 29          | 24                        | 26             | 31                     | 24             | 18        | 31                     | 32                    | 28             | 30           | 32                   | 31                           | 32        | 23         | 29      | 28                          | 25                         | 25                         | 25                         |
| Diet high in trans fatty acids                    | 29     | 24                       | 20             | 19          | 13                        | 21             | 25                     | 21             | 36        | 22                     | 25                    | 34             | 29           | 27                   | 20                           | 36        | 31         | 33      | 31                          | 34                         | 33                         | 34                         |
| Diet high in sugar-sweetened beverages            | 30     | 22                       | 27             | 28          | 19                        | 30             | 26                     | 25             | 25        | 30                     | 23                    | 29             | 34           | 30                   | 30                           | 23        | 29         | 28      | 24                          | 30                         | 29                         | 28                         |
| Lead exposure                                     | 31     | 27                       | 22             | 22          | 25                        | 23             | 24                     | 23             | 27        | 26                     | 30                    | 30             | 27           | 26                   | 29                           | 28        | 27         | 31      | 27                          | 26                         | 28                         | 30                         |
| Low bone mineral density                          | 32     | 23                       | 21             | 23          | 28                        | 24             | 28                     | 29             | 29        | 35                     | 33                    | 33             | 33           | 33                   | 33                           | 31        | 35         | 32      | 36                          | 33                         | 35                         | 32                         |
| Occupational noise                                | 33     | 31                       | 32             | 31          | 30                        | 33             | 32                     | 30             | 31        | 32                     | 31                    | 31             | 31           | 31                   | 34                           | 33        | 34         | 34      | 32                          | 27                         | 30                         | 29                         |
| Ambient ozone pollution                           | 34     | 35                       | 30             | 37          | 27                        | 31             | 39                     | 31             | 26        | 39                     | 38                    | 38             | 35           | 39                   | 37                           | 39        | 32         | 39      | 39                          | 35                         | 34                         | 35                         |
| Occupational astmagens                            | 35     | 29                       | 31             | 30          | 31                        | 34             | 35                     | 34             | 39        | 33                     | 34                    | 32             | 37           | 34                   | 32                           | 30        | 33         | 26      | 33                          | 31                         | 31                         | 31                         |
| Diet low in calcium                               | 36     | 25                       | 25             | 24          | 23                        | 25             | 30                     | 27             | 33        | 37                     | 37                    | 36             | 36           | 37                   | 38                           | 35        | 36         | 35      | 36                          | 36                         | 36                         | 36                         |
| Occupational carcinogens                          | 37     | 32                       | 23             | 26          | 22                        | 32             | 29                     | 33             | 34        | 36                     | 35                    | 35             | 32           | 35                   | 36                           | 34        | 38         | 37      | 34                          | 39                         | 39                         | 39                         |
| Diet low in milk                                  | 38     | 26                       | 24             | 27          | 26                        | 27             | 33                     | 28             | 37        | 38                     | 39                    | 37             | 38           | 38                   | 39                           | 37        | 37         | 38      | 38                          | 37                         | 38                         | 37                         |
| Diet high in red meat                             | 39     | 28                       | 26             | 25          | 29                        | 29             | 27                     | 26             | 38        | 34                     | 36                    | 39             | 39           | 36                   | 35                           | 38        | 39         | 35      | 37                          | 38                         | 37                         | 38                         |
| Residential radon                                 |        |                          |                |             |                           |                |                        |                |           |                        |                       |                |              |                      |                              |           |            |         |                             |                            |                            |                            |
| Childhood sexual abuse                            |        |                          |                |             |                           |                |                        |                |           |                        |                       |                |              |                      |                              |           |            |         |                             |                            |                            |                            |
| Physical inactivity and low physical activity     |        |                          |                |             |                           |                |                        |                |           |                        |                       |                |              |                      |                              |           |            |         |                             |                            |                            |                            |
| Intimate partner violence                         |        |                          |                |             |                           |                |                        |                |           |                        |                       |                |              |                      |                              |           |            |         |                             |                            |                            |                            |

Regions are ordered by mean life expectancy.

No data=attributable disability-adjusted life years were not quantified.

Rankings are color-coded as follows:

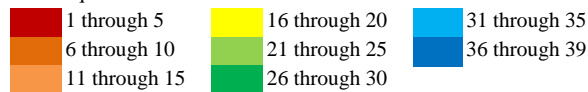

**Web table 1: Global deaths attributable to risk factors by age and sex in 2010**

| Risk                                         | Both Sexes,<br>All Ages            | Both Sexes,<br>0-6 Days   | Both Sexes,<br>7-27 Days   | Both Sexes,<br>28-364 Days   | Both Sexes,<br>1-4 Years     | Both Sexes,<br>5-9 Years | Both Sexes,<br>10-14 Years |
|----------------------------------------------|------------------------------------|---------------------------|----------------------------|------------------------------|------------------------------|--------------------------|----------------------------|
| Unimproved water and sanitation              | 337,476<br>(13,150–648,205)        | 5,742<br>(266–11,546)     | 11,562<br>(513–22,408)     | 78,490<br>(3,404–148,556)    | 59,896<br>(2,621–114,551)    | 13,751<br>(528–26,645)   | 7,345<br>(289–15,357)      |
| Unimproved water source                      | 116,126<br>(7,518–233,136)         | 2,268<br>(160–4,744)      | 4,352<br>(289–8,924)       | 30,575<br>(2,045–60,286)     | 23,467<br>(1,564–47,572)     | 4,701<br>(295–9,643)     | 2,366<br>(143–5,190)       |
| Unimproved sanitation                        | 244,106<br>(6,027–478,186)         | 3,923<br>(99–8,288)       | 8,083<br>(214–16,246)      | 53,883<br>(1,398–105,643)    | 41,170<br>(1,083–81,737)     | 9,954<br>(238–19,957)    | 5,425<br>(135–11,562)      |
| Air pollution                                |                                    |                           |                            |                              |                              |                          |                            |
| Ambient particulate matter pollution         | 3,223,540<br>(2,828,854–3,619,148) | 16,526<br>(10,489–24,056) | 13,853<br>(8,838–19,546)   | 59,549<br>(40,421–80,135)    | 37,257<br>(24,939–51,925)    | 0<br>(0–0)               | 0<br>(0–0)                 |
| Household air pollution from solid fuels     | 3,478,773<br>(2,638,548–4,386,590) | 56,112<br>(36,948–76,903) | 44,843<br>(30,211–59,407)  | 208,416<br>(144,472–266,698) | 128,974<br>(91,322–173,421)  | 0<br>(0–0)               | 0<br>(0–0)                 |
| Ambient ozone pollution                      | 152,434<br>(52,272–267,431)        | 0<br>(0–0)                | 0<br>(0–0)                 | 0<br>(0–0)                   | 0<br>(0–0)                   | 0<br>(0–0)               | 0<br>(0–0)                 |
| Other environmental risks                    | 773,030<br>(640,893–929,935)       | 0<br>(0–0)                | 0<br>(0–0)                 | 0<br>(0–0)                   | 0<br>(0–0)                   | 0<br>(0–0)               | 0<br>(0–0)                 |
| Residential radon                            | 98,992<br>(13,133–215,237)         | 0<br>(0–0)                | 0<br>(0–0)                 | 0<br>(0–0)                   | 0<br>(0–0)                   | 0<br>(0–0)               | 0<br>(0–0)                 |
| Lead exposure                                | 674,038<br>(575,858–779,314)       | 0<br>(0–0)                | 0<br>(0–0)                 | 0<br>(0–0)                   | 0<br>(0–0)                   | 0<br>(0–0)               | 0<br>(0–0)                 |
| Child and maternal undernutrition            | 1,438,305<br>(1,175,257–1,713,103) | 0<br>(0–0)                | 90,836<br>(54,038–123,893) | 721,637<br>(570,882–882,976) | 518,754<br>(414,384–639,905) | 1,408<br>(1,067–1,857)   | 1,252<br>(945–1,631)       |
| Suboptimal breastfeeding                     | 544,817<br>(338,453–775,077)       | 0<br>(0–0)                | 90,836<br>(54,038–123,893) | 417,748<br>(249,596–613,606) | 36,233<br>(3,467–80,680)     | 0<br>(0–0)               | 0<br>(0–0)                 |
| Non-exclusive breastfeeding                  | 475,888<br>(272,493–684,422)       | 0<br>(0–0)                | 90,836<br>(54,038–123,893) | 385,051<br>(214,204–563,219) | 0<br>(0–0)                   | 0<br>(0–0)               | 0<br>(0–0)                 |
| Discontinued breastfeeding                   | 68,929<br>(6,445–153,290)          | 0<br>(0–0)                | 0<br>(0–0)                 | 32,696<br>(2,977–75,138)     | 36,233<br>(3,467–80,680)     | 0<br>(0–0)               | 0<br>(0–0)                 |
| Childhood underweight                        | 860,117<br>(715,742–1,033,573)     | 0<br>(0–0)                | 0<br>(0–0)                 | 456,852<br>(373,978–544,720) | 403,265<br>(324,901–495,038) | 0<br>(0–0)               | 0<br>(0–0)                 |
| Iron deficiency                              | 119,608<br>(93,261–139,985)        | 0<br>(0–0)                | 0<br>(0–0)                 | 4,732<br>(3,473–6,131)       | 7,799<br>(5,825–10,574)      | 1,408<br>(1,067–1,857)   | 1,252<br>(945–1,631)       |
| Vitamin A deficiency                         | 119,762<br>(61,723–191,846)        | 0<br>(0–0)                | 0<br>(0–0)                 | 29,946<br>(13,850–50,920)    | 89,817<br>(46,880–142,677)   | 0<br>(0–0)               | 0<br>(0–0)                 |
| Zinc deficiency                              | 97,330<br>(17,575–190,527)         | 0<br>(0–0)                | 0<br>(0–0)                 | 0<br>(0–0)                   | 97,330<br>(17,575–190,527)   | 0<br>(0–0)               | 0<br>(0–0)                 |
| Tobacco smoking, including second-hand smoke | 6,297,287<br>(5,395,769–7,006,942) | 15,394<br>(9,856–22,066)  | 12,964<br>(8,668–17,719)   | 61,568<br>(41,829–82,500)    | 34,722<br>(23,397–46,997)    | 0<br>(0–0)               | 0<br>(0–0)                 |
| Tobacco smoking                              | 5,695,349<br>(4,755,779–6,421,611) | 0<br>(0–0)                | 0<br>(0–0)                 | 0<br>(0–0)                   | 0<br>(0–0)                   | 0<br>(0–0)               | 0<br>(0–0)                 |
| Second-hand smoke                            | 601,938<br>(447,705–745,328)       | 15,394<br>(9,856–22,066)  | 12,964<br>(8,668–17,719)   | 61,568<br>(41,829–82,500)    | 34,722<br>(23,397–46,997)    | 0<br>(0–0)               | 0<br>(0–0)                 |
| Alcohol and drug use                         | 2,882,343<br>(2,601,098–3,161,618) | 542<br>(389–854)          | 466<br>(303–751)           | 2,751<br>(1,877–4,547)       | 7,340<br>(4,952–10,841)      | 2,520<br>(1,975–3,354)   | 2,287<br>(1,853–2,947)     |
| Alcohol use                                  | 2,735,511<br>(2,464,575–3,006,459) | 222<br>(142–366)          | 114<br>(66–213)            | 1,017<br>(705–1,529)         | 4,873<br>(3,071–7,823)       | 1,947<br>(1,486–2,680)   | 1,734<br>(1,382–2,207)     |

**Web table 1: Global deaths attributable to risk factors by age and sex in 2010**

| Risk                                          | Both Sexes,<br>All Ages               | Both Sexes,<br>0-6 Days | Both Sexes,<br>7-27 Days | Both Sexes,<br>28-364 Days | Both Sexes,<br>1-4 Years | Both Sexes,<br>5-9 Years | Both Sexes,<br>10-14 Years |
|-----------------------------------------------|---------------------------------------|-------------------------|--------------------------|----------------------------|--------------------------|--------------------------|----------------------------|
| Drug use                                      | 157,805<br>(124,639–209,873)          | 320<br>(187–593)        | 352<br>(197–631)         | 1,734<br>(962–3,560)       | 2,467<br>(1,271–4,303)   | 573<br>(340–1,071)       | 553<br>(361–1,020)         |
| Physiological risk factors                    |                                       |                         |                          |                            |                          |                          |                            |
| High fasting plasma glucose                   | 3,356,271<br>(2,917,520–3,782,483)    | 0<br>(0–0)              | 0<br>(0–0)               | 0<br>(0–0)                 | 0<br>(0–0)               | 0<br>(0–0)               | 0<br>(0–0)                 |
| High total cholesterol                        | 2,018,811<br>(1,572,853–2,479,097)    | 0<br>(0–0)              | 0<br>(0–0)               | 0<br>(0–0)                 | 0<br>(0–0)               | 0<br>(0–0)               | 0<br>(0–0)                 |
| High blood pressure                           | 9,395,860<br>(8,579,630–10,147,805)   | 0<br>(0–0)              | 0<br>(0–0)               | 0<br>(0–0)                 | 0<br>(0–0)               | 0<br>(0–0)               | 0<br>(0–0)                 |
| High body-mass index                          | 3,371,232<br>(2,817,774–3,951,127)    | 0<br>(0–0)              | 0<br>(0–0)               | 0<br>(0–0)                 | 0<br>(0–0)               | 0<br>(0–0)               | 0<br>(0–0)                 |
| Low bone mineral density                      | 187,586<br>(140,636–219,906)          | 0<br>(0–0)              | 0<br>(0–0)               | 0<br>(0–0)                 | 0<br>(0–0)               | 0<br>(0–0)               | 0<br>(0–0)                 |
| Dietary risk factors and physical inactivity  | 12,288,450<br>(11,487,702–13,115,164) | 0<br>(0–0)              | 0<br>(0–0)               | 0<br>(0–0)                 | 0<br>(0–0)               | 0<br>(0–0)               | 0<br>(0–0)                 |
| Diet low in fruits                            | 4,902,242<br>(3,818,356–5,881,561)    | 0<br>(0–0)              | 0<br>(0–0)               | 0<br>(0–0)                 | 0<br>(0–0)               | 0<br>(0–0)               | 0<br>(0–0)                 |
| Diet low in vegetables                        | 1,797,254<br>(1,205,059–2,394,366)    | 0<br>(0–0)              | 0<br>(0–0)               | 0<br>(0–0)                 | 0<br>(0–0)               | 0<br>(0–0)               | 0<br>(0–0)                 |
| Diet low in whole grains                      | 1,725,812<br>(1,342,896–2,067,224)    | 0<br>(0–0)              | 0<br>(0–0)               | 0<br>(0–0)                 | 0<br>(0–0)               | 0<br>(0–0)               | 0<br>(0–0)                 |
| Diet low in nuts and seeds                    | 2,471,823<br>(1,559,603–3,226,994)    | 0<br>(0–0)              | 0<br>(0–0)               | 0<br>(0–0)                 | 0<br>(0–0)               | 0<br>(0–0)               | 0<br>(0–0)                 |
| Diet low in milk                              | 100,951<br>(29,728–171,340)           | 0<br>(0–0)              | 0<br>(0–0)               | 0<br>(0–0)                 | 0<br>(0–0)               | 0<br>(0–0)               | 0<br>(0–0)                 |
| Diet high in red meat                         | 38,092<br>(10,749–65,727)             | 0<br>(0–0)              | 0<br>(0–0)               | 0<br>(0–0)                 | 0<br>(0–0)               | 0<br>(0–0)               | 0<br>(0–0)                 |
| Diet high in processed meat                   | 840,857<br>(188,952–1,460,279)        | 0<br>(0–0)              | 0<br>(0–0)               | 0<br>(0–0)                 | 0<br>(0–0)               | 0<br>(0–0)               | 0<br>(0–0)                 |
| Diet high in sugar-sweetened beverages        | 210,780<br>(136,271–299,863)          | 0<br>(0–0)              | 0<br>(0–0)               | 0<br>(0–0)                 | 0<br>(0–0)               | 0<br>(0–0)               | 0<br>(0–0)                 |
| Diet low in fibre                             | 742,888<br>(334,379–1,166,933)        | 0<br>(0–0)              | 0<br>(0–0)               | 0<br>(0–0)                 | 0<br>(0–0)               | 0<br>(0–0)               | 0<br>(0–0)                 |
| Diet low in calcium                           | 125,594<br>(88,323–164,800)           | 0<br>(0–0)              | 0<br>(0–0)               | 0<br>(0–0)                 | 0<br>(0–0)               | 0<br>(0–0)               | 0<br>(0–0)                 |
| Diet low in seafood omega-3 fatty acids       | 1,389,896<br>(1,010,300–1,781,401)    | 0<br>(0–0)              | 0<br>(0–0)               | 0<br>(0–0)                 | 0<br>(0–0)               | 0<br>(0–0)               | 0<br>(0–0)                 |
| Diet low in polyunsaturated fatty acids       | 533,603<br>(245,096–820,854)          | 0<br>(0–0)              | 0<br>(0–0)               | 0<br>(0–0)                 | 0<br>(0–0)               | 0<br>(0–0)               | 0<br>(0–0)                 |
| Diet high in trans fatty acids                | 515,260<br>(371,081–649,451)          | 0<br>(0–0)              | 0<br>(0–0)               | 0<br>(0–0)                 | 0<br>(0–0)               | 0<br>(0–0)               | 0<br>(0–0)                 |
| Diet high in sodium                           | 3,104,308<br>(2,016,734–4,105,019)    | 0<br>(0–0)              | 0<br>(0–0)               | 0<br>(0–0)                 | 0<br>(0–0)               | 0<br>(0–0)               | 0<br>(0–0)                 |
| Physical inactivity and low physical activity | 3,183,940<br>(2,657,204–3,718,963)    | 0<br>(0–0)              | 0<br>(0–0)               | 0<br>(0–0)                 | 0<br>(0–0)               | 0<br>(0–0)               | 0<br>(0–0)                 |

**Web table 1: Global deaths attributable to risk factors by age and sex in 2010**

| Risk                                                      | Both Sexes,<br>All Ages        | Both Sexes,<br>0-6 Days | Both Sexes,<br>7-27 Days | Both Sexes,<br>28-364 Days | Both Sexes,<br>1-4 Years | Both Sexes,<br>5-9 Years | Both Sexes,<br>10-14 Years |
|-----------------------------------------------------------|--------------------------------|-------------------------|--------------------------|----------------------------|--------------------------|--------------------------|----------------------------|
| Occupational risk factors                                 | 852,107<br>(659,652–1,062,443) | 0<br>(0–0)              | 0<br>(0–0)               | 0<br>(0–0)                 | 0<br>(0–0)               | 0<br>(0–0)               | 0<br>(0–0)                 |
| Occupational carcinogens                                  | 118,097<br>(77,249–160,431)    | 0<br>(0–0)              | 0<br>(0–0)               | 0<br>(0–0)                 | 0<br>(0–0)               | 0<br>(0–0)               | 0<br>(0–0)                 |
| Occupational exposure to asbestos                         | 33,610<br>(20,317–43,647)      | 0<br>(0–0)              | 0<br>(0–0)               | 0<br>(0–0)                 | 0<br>(0–0)               | 0<br>(0–0)               | 0<br>(0–0)                 |
| Occupational exposure to arsenic                          | 2,662<br>(1,011–4,860)         | 0<br>(0–0)              | 0<br>(0–0)               | 0<br>(0–0)                 | 0<br>(0–0)               | 0<br>(0–0)               | 0<br>(0–0)                 |
| Occupational exposure to benzene                          | 2,731<br>(1,111–4,811)         | 0<br>(0–0)              | 0<br>(0–0)               | 0<br>(0–0)                 | 0<br>(0–0)               | 0<br>(0–0)               | 0<br>(0–0)                 |
| Occupational exposure to beryllium                        | 163<br>(65–276)                | 0<br>(0–0)              | 0<br>(0–0)               | 0<br>(0–0)                 | 0<br>(0–0)               | 0<br>(0–0)               | 0<br>(0–0)                 |
| Occupational exposure to cadmium                          | 555<br>(249–901)               | 0<br>(0–0)              | 0<br>(0–0)               | 0<br>(0–0)                 | 0<br>(0–0)               | 0<br>(0–0)               | 0<br>(0–0)                 |
| Occupational exposure to chromium                         | 1,931<br>(1,140–2,799)         | 0<br>(0–0)              | 0<br>(0–0)               | 0<br>(0–0)                 | 0<br>(0–0)               | 0<br>(0–0)               | 0<br>(0–0)                 |
| Occupational exposure to diesel engine exhaust            | 22,187<br>(12,180–33,213)      | 0<br>(0–0)              | 0<br>(0–0)               | 0<br>(0–0)                 | 0<br>(0–0)               | 0<br>(0–0)               | 0<br>(0–0)                 |
| Occupational exposure to second-hand smoke                | 24,235<br>(16,094–31,803)      | 0<br>(0–0)              | 0<br>(0–0)               | 0<br>(0–0)                 | 0<br>(0–0)               | 0<br>(0–0)               | 0<br>(0–0)                 |
| Occupational exposure to formaldehyde                     | 731<br>(301–1,361)             | 0<br>(0–0)              | 0<br>(0–0)               | 0<br>(0–0)                 | 0<br>(0–0)               | 0<br>(0–0)               | 0<br>(0–0)                 |
| Occupational exposure to nickel                           | 9,145<br>(2,449–18,834)        | 0<br>(0–0)              | 0<br>(0–0)               | 0<br>(0–0)                 | 0<br>(0–0)               | 0<br>(0–0)               | 0<br>(0–0)                 |
| Occupational exposure to polycyclic aromatic hydrocarbons | 4,086<br>(1,909–6,567)         | 0<br>(0–0)              | 0<br>(0–0)               | 0<br>(0–0)                 | 0<br>(0–0)               | 0<br>(0–0)               | 0<br>(0–0)                 |
| Occupational exposure to silica                           | 16,277<br>(9,875–22,272)       | 0<br>(0–0)              | 0<br>(0–0)               | 0<br>(0–0)                 | 0<br>(0–0)               | 0<br>(0–0)               | 0<br>(0–0)                 |
| Occupational exposure to sulfuric acid                    | 2,845<br>(833–6,109)           | 0<br>(0–0)              | 0<br>(0–0)               | 0<br>(0–0)                 | 0<br>(0–0)               | 0<br>(0–0)               | 0<br>(0–0)                 |
| Occupational asthmagens                                   | 33,716<br>(22,844–58,659)      | 0<br>(0–0)              | 0<br>(0–0)               | 0<br>(0–0)                 | 0<br>(0–0)               | 0<br>(0–0)               | 0<br>(0–0)                 |
| Occupational particulate matter, gases, and fumes         | 218,864<br>(100,403–344,633)   | 0<br>(0–0)              | 0<br>(0–0)               | 0<br>(0–0)                 | 0<br>(0–0)               | 0<br>(0–0)               | 0<br>(0–0)                 |
| Occupational noise                                        | 0<br>(0–0)                     | 0<br>(0–0)              | 0<br>(0–0)               | 0<br>(0–0)                 | 0<br>(0–0)               | 0<br>(0–0)               | 0<br>(0–0)                 |
| Occupational risk factors for injuries                    | 481,429<br>(363,778–639,590)   | 0<br>(0–0)              | 0<br>(0–0)               | 0<br>(0–0)                 | 0<br>(0–0)               | 0<br>(0–0)               | 0<br>(0–0)                 |
| Occupational low back pain                                | 0<br>(0–0)                     | 0<br>(0–0)              | 0<br>(0–0)               | 0<br>(0–0)                 | 0<br>(0–0)               | 0<br>(0–0)               | 0<br>(0–0)                 |
| Sexual abuse and violence                                 | 238,359<br>(143,200–325,690)   | 0<br>(0–0)              | 0<br>(0–0)               | 0<br>(0–0)                 | 0<br>(0–0)               | 19<br>(9–35)             | 717<br>(314–1,407)         |
| Childhood sexual abuse                                    | 64,438<br>(37,339–94,174)      | 0<br>(0–0)              | 0<br>(0–0)               | 0<br>(0–0)                 | 0<br>(0–0)               | 19<br>(9–35)             | 717<br>(314–1,407)         |
| Intimate partner violence                                 | 186,365<br>(92,028–280,059)    | 0<br>(0–0)              | 0<br>(0–0)               | 0<br>(0–0)                 | 0<br>(0–0)               | 0<br>(0–0)               | 0<br>(0–0)                 |

| Web table 1: Global deaths attributable to risk factors by age and sex in 2010 |                            |                            |                             |                             |                              |                              |                              |
|--------------------------------------------------------------------------------|----------------------------|----------------------------|-----------------------------|-----------------------------|------------------------------|------------------------------|------------------------------|
| Risk                                                                           | Both Sexes,<br>15-19 Years | Both Sexes,<br>20-24 Years | Both Sexes,<br>25-29 Years  | Both Sexes,<br>30-34 Years  | Both Sexes,<br>35-39 Years   | Both Sexes,<br>40-44 Years   | Both Sexes,<br>45-49 Years   |
| Unimproved water and sanitation                                                | 7,927<br>(287-16,589)      | 9,312<br>(343-18,640)      | 9,875<br>(386-19,842)       | 8,925<br>(345-17,258)       | 8,330<br>(290-16,469)        | 7,341<br>(265-14,658)        | 7,863<br>(261-15,887)        |
| Unimproved water source                                                        | 2,645<br>(160-5,741)       | 3,188<br>(189-6,761)       | 3,458<br>(221-7,336)        | 3,098<br>(206-6,489)        | 2,788<br>(176-5,768)         | 2,391<br>(148-5,055)         | 2,437<br>(156-5,141)         |
| Unimproved sanitation                                                          | 5,783<br>(129-12,280)      | 6,733<br>(144-13,914)      | 7,082<br>(165-14,724)       | 6,422<br>(152-13,019)       | 6,077<br>(127-12,447)        | 5,410<br>(118-11,161)        | 5,901<br>(116-12,237)        |
| Air pollution                                                                  |                            |                            |                             |                             |                              |                              |                              |
| Ambient particulate matter pollution                                           | 0<br>(0-0)                 | 0<br>(0-0)                 | 19,383<br>(13,539-25,181)   | 28,261<br>(20,627-36,185)   | 46,942<br>(34,622-58,828)    | 83,986<br>(61,621-105,440)   | 119,288<br>(87,902-150,065)  |
| Household air pollution from solid fuels                                       | 0<br>(0-0)                 | 0<br>(0-0)                 | 22,293<br>(15,813-30,263)   | 31,629<br>(22,799-42,938)   | 50,274<br>(35,553-66,934)    | 86,704<br>(60,670-116,008)   | 119,410<br>(81,956-160,836)  |
| Ambient ozone pollution                                                        | 0<br>(0-0)                 | 0<br>(0-0)                 | 375<br>(116-765)            | 446<br>(133-905)            | 748<br>(235-1,401)           | 1,216<br>(386-2,262)         | 2,201<br>(708-4,176)         |
| Other environmental risks                                                      | 0<br>(0-0)                 | 0<br>(0-0)                 | 5,104<br>(3,304-7,453)      | 7,743<br>(5,241-10,924)     | 10,495<br>(8,296-14,745)     | 17,600<br>(13,746-24,585)    | 26,858<br>(21,596-33,065)    |
| Residential radon                                                              | 0<br>(0-0)                 | 0<br>(0-0)                 | 179<br>(19-460)             | 361<br>(42-894)             | 815<br>(97-2,018)            | 1,979<br>(252-4,700)         | 3,884<br>(506-8,889)         |
| Lead exposure                                                                  | 0<br>(0-0)                 | 0<br>(0-0)                 | 4,925<br>(3,169-7,265)      | 7,382<br>(4,951-10,481)     | 9,680<br>(7,589-13,871)      | 15,621<br>(12,287-22,423)    | 22,974<br>(18,703-27,494)    |
| Child and maternal undernutrition                                              | 6,986<br>(4,831-9,348)     | 14,132<br>(9,115-18,457)   | 13,684<br>(8,451-17,980)    | 11,995<br>(7,443-15,896)    | 10,630<br>(6,237-14,915)     | 6,881<br>(4,454-9,230)       | 4,507<br>(3,088-5,903)       |
| Suboptimal breastfeeding                                                       | 0<br>(0-0)                 | 0<br>(0-0)                 | 0<br>(0-0)                  | 0<br>(0-0)                  | 0<br>(0-0)                   | 0<br>(0-0)                   | 0<br>(0-0)                   |
| Non-exclusive breastfeeding                                                    | 0<br>(0-0)                 | 0<br>(0-0)                 | 0<br>(0-0)                  | 0<br>(0-0)                  | 0<br>(0-0)                   | 0<br>(0-0)                   | 0<br>(0-0)                   |
| Discontinued breastfeeding                                                     | 0<br>(0-0)                 | 0<br>(0-0)                 | 0<br>(0-0)                  | 0<br>(0-0)                  | 0<br>(0-0)                   | 0<br>(0-0)                   | 0<br>(0-0)                   |
| Childhood underweight                                                          | 0<br>(0-0)                 | 0<br>(0-0)                 | 0<br>(0-0)                  | 0<br>(0-0)                  | 0<br>(0-0)                   | 0<br>(0-0)                   | 0<br>(0-0)                   |
| Iron deficiency                                                                | 6,986<br>(4,831-9,348)     | 14,132<br>(9,115-18,457)   | 13,684<br>(8,451-17,980)    | 11,995<br>(7,443-15,896)    | 10,630<br>(6,237-14,915)     | 6,881<br>(4,454-9,230)       | 4,507<br>(3,088-5,903)       |
| Vitamin A deficiency                                                           | 0<br>(0-0)                 | 0<br>(0-0)                 | 0<br>(0-0)                  | 0<br>(0-0)                  | 0<br>(0-0)                   | 0<br>(0-0)                   | 0<br>(0-0)                   |
| Zinc deficiency                                                                | 0<br>(0-0)                 | 0<br>(0-0)                 | 0<br>(0-0)                  | 0<br>(0-0)                  | 0<br>(0-0)                   | 0<br>(0-0)                   | 0<br>(0-0)                   |
| Tobacco smoking, including second-hand smoke                                   | 0<br>(0-0)                 | 0<br>(0-0)                 | 2,781<br>(1,860-3,717)      | 45,557<br>(37,167-57,566)   | 82,782<br>(62,570-104,142)   | 167,605<br>(135,201-202,849) | 266,672<br>(231,366-304,378) |
| Tobacco smoking                                                                | 0<br>(0-0)                 | 0<br>(0-0)                 | 0<br>(0-0)                  | 41,700<br>(33,543-53,877)   | 77,635<br>(57,110-98,732)    | 159,037<br>(126,938-194,322) | 252,839<br>(217,743-292,135) |
| Second-hand smoke                                                              | 0<br>(0-0)                 | 0<br>(0-0)                 | 2,781<br>(1,860-3,717)      | 3,857<br>(2,650-5,069)      | 5,147<br>(3,488-6,734)       | 8,568<br>(5,741-11,414)      | 13,834<br>(9,279-18,293)     |
| Alcohol and drug use                                                           | 47,576<br>(39,843-56,170)  | 89,470<br>(75,217-104,352) | 105,131<br>(89,973-121,372) | 106,200<br>(92,178-120,507) | 153,451<br>(133,884-175,849) | 178,612<br>(158,881-202,666) | 219,203<br>(195,232-243,514) |
| Alcohol use                                                                    | 43,252<br>(35,488-51,791)  | 77,407<br>(64,487-91,668)  | 87,921<br>(73,852-103,453)  | 88,818<br>(76,090-102,309)  | 135,626<br>(116,887-156,261) | 161,132<br>(142,629-184,403) | 203,282<br>(179,796-227,983) |



**Web table 1: Global deaths attributable to risk factors by age and sex in 2010**

| Risk                                          | Both Sexes,<br>15-19 Years | Both Sexes,<br>20-24 Years | Both Sexes,<br>25-29 Years | Both Sexes,<br>30-34 Years | Both Sexes,<br>35-39 Years   | Both Sexes,<br>40-44 Years   | Both Sexes,<br>45-49 Years   |
|-----------------------------------------------|----------------------------|----------------------------|----------------------------|----------------------------|------------------------------|------------------------------|------------------------------|
| Drug use                                      | 4,514<br>(2,996–6,858)     | 12,688<br>(8,477–19,023)   | 18,015<br>(12,883–25,715)  | 17,947<br>(13,703–24,111)  | 18,558<br>(14,039–24,687)    | 18,465<br>(13,637–25,171)    | 17,219<br>(12,729–23,413)    |
| Physiological risk factors                    |                            |                            |                            |                            |                              |                              |                              |
| High fasting plasma glucose                   | 0<br>(0–0)                 | 0<br>(0–0)                 | 16,376<br>(13,393–19,453)  | 21,148<br>(17,209–25,587)  | 43,429<br>(35,413–52,077)    | 66,152<br>(54,203–78,473)    | 131,855<br>(111,312–153,375) |
| High total cholesterol                        | 0<br>(0–0)                 | 0<br>(0–0)                 | 6,572<br>(4,394–8,963)     | 9,962<br>(6,553–13,920)    | 24,515<br>(17,800–31,983)    | 42,725<br>(31,400–55,359)    | 76,279<br>(57,998–95,565)    |
| High blood pressure                           | 0<br>(0–0)                 | 0<br>(0–0)                 | 31,718<br>(24,757–38,787)  | 42,412<br>(33,437–51,292)  | 85,457<br>(71,052–99,442)    | 138,576<br>(115,600–161,057) | 269,840<br>(238,063–301,765) |
| High body-mass index                          | 0<br>(0–0)                 | 0<br>(0–0)                 | 19,916<br>(15,486–24,861)  | 26,581<br>(20,553–33,369)  | 52,528<br>(42,411–63,304)    | 84,536<br>(68,301–101,372)   | 142,047<br>(118,257–167,130) |
| Low bone mineral density                      | 0<br>(0–0)                 | 0<br>(0–0)                 | 0<br>(0–0)                 | 0<br>(0–0)                 | 0<br>(0–0)                   | 0<br>(0–0)                   | 0<br>(0–0)                   |
| Dietary risk factors and physical inactivity  | 0<br>(0–0)                 | 0<br>(0–0)                 | 55,529<br>(49,093–62,597)  | 84,329<br>(75,257–93,960)  | 142,660<br>(127,336–156,827) | 257,650<br>(231,898–281,780) | 408,925<br>(370,942–445,266) |
| Diet low in fruits                            | 0<br>(0–0)                 | 0<br>(0–0)                 | 29,556<br>(22,733–36,007)  | 43,549<br>(33,426–53,056)  | 72,886<br>(56,575–88,493)    | 132,153<br>(102,782–158,869) | 205,974<br>(158,169–245,090) |
| Diet low in vegetables                        | 0<br>(0–0)                 | 0<br>(0–0)                 | 14,731<br>(9,377–19,724)   | 20,712<br>(13,467–27,691)  | 32,118<br>(20,106–43,252)    | 53,791<br>(34,064–71,797)    | 80,658<br>(51,595–107,242)   |
| Diet low in whole grains                      | 0<br>(0–0)                 | 0<br>(0–0)                 | 13,004<br>(9,944–16,207)   | 18,729<br>(14,177–23,363)  | 29,575<br>(22,577–36,641)    | 51,176<br>(39,003–62,409)    | 75,062<br>(57,926–91,881)    |
| Diet low in nuts and seeds                    | 0<br>(0–0)                 | 0<br>(0–0)                 | 15,304<br>(10,067–19,719)  | 23,376<br>(15,406–30,657)  | 37,278<br>(24,867–48,870)    | 65,322<br>(43,503–84,936)    | 96,674<br>(63,319–125,988)   |
| Diet low in milk                              | 0<br>(0–0)                 | 0<br>(0–0)                 | 608<br>(175–1,051)         | 918<br>(263–1,564)         | 1,522<br>(407–2,611)         | 2,463<br>(691–4,208)         | 3,999<br>(1,160–6,973)       |
| Diet high in red meat                         | 0<br>(0–0)                 | 0<br>(0–0)                 | 153<br>(42–266)            | 253<br>(72–452)            | 462<br>(128–853)             | 788<br>(219–1,399)           | 1,346<br>(368–2,395)         |
| Diet high in processed meat                   | 0<br>(0–0)                 | 0<br>(0–0)                 | 5,785<br>(1,293–10,388)    | 8,788<br>(1,911–15,937)    | 13,433<br>(2,863–24,166)     | 23,635<br>(4,991–43,764)     | 36,276<br>(8,262–63,401)     |
| Diet high in sugar-sweetened beverages        | 0<br>(0–0)                 | 0<br>(0–0)                 | 2,833<br>(1,681–4,191)     | 3,725<br>(2,165–5,118)     | 4,663<br>(1,835–7,876)       | 7,031<br>(2,463–12,145)      | 9,159<br>(3,264–15,089)      |
| Diet low in fibre                             | 0<br>(0–0)                 | 0<br>(0–0)                 | 6,217<br>(2,769–9,778)     | 9,159<br>(4,075–14,334)    | 14,693<br>(6,311–22,524)     | 24,543<br>(10,944–38,488)    | 35,718<br>(15,907–56,352)    |
| Diet low in calcium                           | 0<br>(0–0)                 | 0<br>(0–0)                 | 767<br>(559–1,032)         | 1,137<br>(810–1,505)       | 1,866<br>(1,345–2,508)       | 2,954<br>(2,154–3,983)       | 4,694<br>(3,455–6,223)       |
| Diet low in seafood omega-3 fatty acids       | 0<br>(0–0)                 | 0<br>(0–0)                 | 10,264<br>(7,269–13,173)   | 15,564<br>(10,897–20,365)  | 24,478<br>(17,108–31,695)    | 42,421<br>(31,370–55,094)    | 61,767<br>(44,216–79,980)    |
| Diet low in polyunsaturated fatty acids       | 0<br>(0–0)                 | 0<br>(0–0)                 | 4,314<br>(2,085–6,637)     | 6,367<br>(3,025–9,704)     | 9,808<br>(4,589–14,853)      | 16,489<br>(7,740–25,406)     | 23,846<br>(11,064–36,070)    |
| Diet high in trans fatty acids                | 0<br>(0–0)                 | 0<br>(0–0)                 | 4,649<br>(3,317–6,064)     | 6,892<br>(4,890–8,947)     | 10,395<br>(7,378–13,277)     | 17,502<br>(12,473–22,588)    | 25,250<br>(17,861–32,222)    |
| Diet high in sodium                           | 0<br>(0–0)                 | 0<br>(0–0)                 | 10,709<br>(5,512–15,656)   | 17,736<br>(11,101–24,204)  | 31,747<br>(20,022–43,823)    | 61,519<br>(40,089–82,711)    | 98,320<br>(65,211–130,036)   |
| Physical inactivity and low physical activity | 0<br>(0–0)                 | 0<br>(0–0)                 | 17,717<br>(14,545–21,127)  | 26,592<br>(22,165–32,284)  | 42,902<br>(35,223–50,963)    | 72,728<br>(60,057–86,619)    | 111,101<br>(91,925–128,952)  |
| Occupational risk factors                     | 32,664<br>(24,539–45,485)  | 62,435<br>(46,472–85,655)  | 70,651<br>(52,333–95,734)  | 65,957<br>(48,624–88,741)  | 64,027<br>(47,245–85,499)    | 62,283<br>(46,692–84,074)    | 62,417<br>(47,607–82,202)    |

**Web table 1: Global deaths attributable to risk factors by age and sex in 2010**

| Risk                                                      | Both Sexes,<br>15-19 Years | Both Sexes,<br>20-24 Years | Both Sexes,<br>25-29 Years | Both Sexes,<br>30-34 Years | Both Sexes,<br>35-39 Years | Both Sexes,<br>40-44 Years | Both Sexes,<br>45-49 Years |
|-----------------------------------------------------------|----------------------------|----------------------------|----------------------------|----------------------------|----------------------------|----------------------------|----------------------------|
| Occupational carcinogens                                  | 243<br>(152-351)           | 409<br>(241-626)           | 535<br>(324-799)           | 681<br>(438-985)           | 1,128<br>(730-1,622)       | 2,364<br>(1,562-3,384)     | 4,896<br>(3,181-6,860)     |
| Occupational exposure to asbestos                         | 102<br>(55-142)            | 117<br>(60-164)            | 127<br>(62-187)            | 158<br>(85-218)            | 245<br>(142-332)           | 480<br>(282-644)           | 1,004<br>(586-1,346)       |
| Occupational exposure to arsenic                          | 0<br>(0-0)                 | 0<br>(0-0)                 | 4<br>(1-8)                 | 9<br>(3-16)                | 24<br>(9-46)               | 56<br>(21-105)             | 124<br>(47-228)            |
| Occupational exposure to benzene                          | 118<br>(50-215)            | 242<br>(101-440)           | 230<br>(96-413)            | 216<br>(89-388)            | 119<br>(50-213)            | 136<br>(56-249)            | 75<br>(32-134)             |
| Occupational exposure to beryllium                        | 0<br>(0-0)                 | 0<br>(0-0)                 | 0<br>(0-0)                 | 1<br>(0-1)                 | 1<br>(1-3)                 | 3<br>(1-6)                 | 8<br>(3-13)                |
| Occupational exposure to cadmium                          | 0<br>(0-0)                 | 0<br>(0-0)                 | 1<br>(0-1)                 | 2<br>(1-3)                 | 5<br>(2-8)                 | 11<br>(5-19)               | 25<br>(11-42)              |
| Occupational exposure to chromium                         | 0<br>(0-0)                 | 0<br>(0-0)                 | 3<br>(2-5)                 | 6<br>(3-10)                | 17<br>(10-26)              | 40<br>(23-60)              | 89<br>(53-132)             |
| Occupational exposure to diesel engine exhaust            | 0<br>(0-0)                 | 0<br>(0-0)                 | 35<br>(17-56)              | 67<br>(36-107)             | 194<br>(104-305)           | 445<br>(252-689)           | 1,011<br>(567-1,538)       |
| Occupational exposure to second-hand smoke                | 0<br>(0-0)                 | 0<br>(0-0)                 | 40<br>(24-59)              | 80<br>(49-116)             | 225<br>(147-314)           | 514<br>(360-702)           | 1,144<br>(775-1,523)       |
| Occupational exposure to formaldehyde                     | 24<br>(10-40)              | 52<br>(22-93)              | 53<br>(23-93)              | 56<br>(23-102)             | 37<br>(15-73)              | 53<br>(19-110)             | 33<br>(11-70)              |
| Occupational exposure to nickel                           | 0<br>(0-0)                 | 0<br>(0-0)                 | 14<br>(3-29)               | 29<br>(8-63)               | 82<br>(21-176)             | 191<br>(52-408)            | 423<br>(110-872)           |
| Occupational exposure to polycyclic aromatic hydrocarbons | 0<br>(0-0)                 | 0<br>(0-0)                 | 6<br>(3-11)                | 13<br>(6-22)               | 36<br>(16-60)              | 83<br>(39-139)             | 187<br>(87-304)            |
| Occupational exposure to silica                           | 0<br>(0-0)                 | 0<br>(0-0)                 | 24<br>(13-37)              | 47<br>(28-71)              | 137<br>(84-202)            | 318<br>(209-455)           | 724<br>(454-1,007)         |
| Occupational exposure to sulfuric acid                    | 0<br>(0-0)                 | 0<br>(0-0)                 | 3<br>(1-7)                 | 7<br>(2-15)                | 25<br>(7-57)               | 79<br>(22-175)             | 182<br>(53-414)            |
| Occupational asthmagens                                   | 358<br>(203-681)           | 740<br>(455-1,354)         | 1,066<br>(689-1,841)       | 1,105<br>(708-1,964)       | 1,488<br>(959-2,785)       | 1,840<br>(1,188-3,252)     | 2,659<br>(1,718-4,868)     |
| Occupational particulate matter, gases, and fumes         | 0<br>(0-0)                 | 0<br>(0-0)                 | 1,382<br>(611-2,345)       | 1,733<br>(786-2,913)       | 2,924<br>(1,346-4,816)     | 4,914<br>(2,251-7,771)     | 8,653<br>(4,028-13,724)    |
| Occupational noise                                        | 0<br>(0-0)                 |
| Occupational risk factors for injuries                    | 32,063<br>(23,863-44,890)  | 61,286<br>(45,285-84,491)  | 67,668<br>(49,469-92,934)  | 62,438<br>(45,594-85,576)  | 58,487<br>(42,023-79,902)  | 53,165<br>(38,056-74,337)  | 46,208<br>(32,800-65,420)  |
| Occupational low back pain                                | 0<br>(0-0)                 |
| Sexual abuse and violence                                 | 22,733<br>(12,019-38,782)  | 28,956<br>(17,714-43,276)  | 24,610<br>(14,985-36,062)  | 20,391<br>(13,235-29,618)  | 20,210<br>(12,545-29,477)  | 19,242<br>(11,546-28,530)  | 17,203<br>(10,285-25,415)  |
| Childhood sexual abuse                                    | 6,208<br>(3,117-10,541)    | 7,162<br>(3,552-12,066)    | 5,923<br>(2,981-10,085)    | 5,068<br>(2,706-8,223)     | 5,202<br>(2,908-8,361)     | 5,495<br>(3,114-8,356)     | 5,539<br>(3,237-8,384)     |
| Intimate partner violence                                 | 18,330<br>(7,592-34,410)   | 23,487<br>(12,704-37,565)  | 19,975<br>(10,948-30,924)  | 16,304<br>(9,629-25,166)   | 15,987<br>(8,588-25,315)   | 14,732<br>(7,145-24,077)   | 12,498<br>(5,857-20,668)   |

**Web table 1: Global deaths attributable to risk factors by age and sex in 2010**

| Risk                                         | Both Sexes,<br>50-54 Years   | Both Sexes,<br>55-59 Years   | Both Sexes,<br>60-64 Years   | Both Sexes,<br>65-69 Years   | Both Sexes,<br>70-74 Years     | Both Sexes,<br>75-79 Years   | Both Sexes,<br>80+ Years           |
|----------------------------------------------|------------------------------|------------------------------|------------------------------|------------------------------|--------------------------------|------------------------------|------------------------------------|
| Unimproved water and sanitation              | 8,151<br>(326–16,408)        | 9,759<br>(376–19,460)        | 12,962<br>(483–26,972)       | 14,139<br>(502–29,129)       | 17,147<br>(685–35,493)         | 14,904<br>(502–31,039)       | 24,054<br>(958–51,100)             |
| Unimproved water source                      | 2,536<br>(172–5,284)         | 2,862<br>(186–6,023)         | 3,729<br>(239–8,007)         | 4,087<br>(256–8,653)         | 4,669<br>(300–10,202)          | 4,107<br>(262–9,056)         | 6,402<br>(416–14,213)              |
| Unimproved sanitation                        | 6,109<br>(150–12,868)        | 7,461<br>(191–15,524)        | 9,982<br>(249–21,194)        | 10,865<br>(260–23,127)       | 13,403<br>(364–28,953)         | 11,598<br>(252–24,967)       | 18,841<br>(526–40,114)             |
| Air pollution                                |                              |                              |                              |                              |                                |                              |                                    |
| Ambient particulate matter pollution         | 184,594<br>(137,748–229,414) | 264,159<br>(197,916–329,587) | 312,142<br>(235,061–380,641) | 350,365<br>(256,084–437,319) | 437,544<br>(310,562–549,395)   | 441,676<br>(319,299–545,498) | 808,013<br>(593,718–1,006,500)     |
| Household air pollution from solid fuels     | 185,729<br>(130,714–250,233) | 265,260<br>(179,824–363,709) | 322,961<br>(223,865–423,616) | 382,801<br>(258,960–520,298) | 459,038<br>(308,038–625,421)   | 440,973<br>(298,421–598,274) | 673,357<br>(451,313–939,330)       |
| Ambient ozone pollution                      | 4,316<br>(1,466–7,814)       | 8,062<br>(2,744–14,031)      | 12,747<br>(4,344–22,552)     | 18,635<br>(6,146–32,946)     | 25,305<br>(8,886–44,211)       | 27,205<br>(8,986–48,144)     | 51,177<br>(17,494–90,709)          |
| Other environmental risks                    | 44,042<br>(34,940–55,390)    | 63,955<br>(49,978–81,112)    | 78,391<br>(61,072–98,724)    | 91,681<br>(74,033–113,972)   | 112,467<br>(91,407–138,330)    | 113,536<br>(94,482–136,448)  | 201,157<br>(170,661–234,060)       |
| Residential radon                            | 7,079<br>(921–15,575)        | 11,324<br>(1,463–25,961)     | 13,548<br>(1,724–30,220)     | 14,401<br>(1,845–31,358)     | 15,897<br>(2,099–34,473)       | 13,896<br>(1,932–30,443)     | 15,630<br>(2,235–32,630)           |
| Lead exposure                                | 36,964<br>(30,600–44,851)    | 52,632<br>(43,971–62,442)    | 64,844<br>(53,983–76,354)    | 77,280<br>(64,747–90,674)    | 96,570<br>(81,172–112,338)     | 99,640<br>(84,717–115,369)   | 185,527<br>(158,672–213,510)       |
| Child and maternal undernutrition            | 2,008<br>(1,456–2,513)       | 2,480<br>(1,811–3,087)       | 3,075<br>(2,132–3,874)       | 3,779<br>(2,684–4,711)       | 4,466<br>(3,166–5,655)         | 4,839<br>(3,477–5,993)       | 14,956<br>(9,848–17,596)           |
| Suboptimal breastfeeding                     | 0<br>(0–0)                   | 0<br>(0–0)                   | 0<br>(0–0)                   | 0<br>(0–0)                   | 0<br>(0–0)                     | 0<br>(0–0)                   | 0<br>(0–0)                         |
| Non-exclusive breastfeeding                  | 0<br>(0–0)                   | 0<br>(0–0)                   | 0<br>(0–0)                   | 0<br>(0–0)                   | 0<br>(0–0)                     | 0<br>(0–0)                   | 0<br>(0–0)                         |
| Discontinued breastfeeding                   | 0<br>(0–0)                   | 0<br>(0–0)                   | 0<br>(0–0)                   | 0<br>(0–0)                   | 0<br>(0–0)                     | 0<br>(0–0)                   | 0<br>(0–0)                         |
| Childhood underweight                        | 0<br>(0–0)                   | 0<br>(0–0)                   | 0<br>(0–0)                   | 0<br>(0–0)                   | 0<br>(0–0)                     | 0<br>(0–0)                   | 0<br>(0–0)                         |
| Iron deficiency                              | 2,008<br>(1,456–2,513)       | 2,480<br>(1,811–3,087)       | 3,075<br>(2,132–3,874)       | 3,779<br>(2,684–4,711)       | 4,466<br>(3,166–5,655)         | 4,839<br>(3,477–5,993)       | 14,956<br>(9,848–17,596)           |
| Vitamin A deficiency                         | 0<br>(0–0)                   | 0<br>(0–0)                   | 0<br>(0–0)                   | 0<br>(0–0)                   | 0<br>(0–0)                     | 0<br>(0–0)                   | 0<br>(0–0)                         |
| Zinc deficiency                              | 0<br>(0–0)                   | 0<br>(0–0)                   | 0<br>(0–0)                   | 0<br>(0–0)                   | 0<br>(0–0)                     | 0<br>(0–0)                   | 0<br>(0–0)                         |
| Tobacco smoking, including second-hand smoke | 422,111<br>(367,296–477,852) | 610,183<br>(523,167–684,715) | 721,026<br>(612,303–809,754) | 782,657<br>(652,139–877,934) | 906,104<br>(739,469–1,024,868) | 836,555<br>(673,595–951,091) | 1,328,606<br>(1,077,222–1,528,946) |
| Tobacco smoking                              | 400,125<br>(345,548–456,401) | 577,913<br>(490,199–656,288) | 680,179<br>(571,860–773,143) | 733,152<br>(606,215–831,566) | 835,859<br>(668,503–960,159)   | 761,951<br>(595,947–880,095) | 1,174,959<br>(919,813–1,384,525)   |
| Second-hand smoke                            | 21,986<br>(14,932–28,718)    | 32,270<br>(22,169–41,920)    | 40,846<br>(27,856–53,015)    | 49,505<br>(33,487–64,034)    | 70,245<br>(47,149–91,083)      | 74,604<br>(49,672–98,144)    | 153,647<br>(102,682–200,924)       |
| Alcohol and drug use                         | 259,637<br>(232,928–288,933) | 289,998<br>(261,407–319,189) | 278,664<br>(251,759–308,347) | 192,815<br>(169,747–217,361) | 246,062<br>(211,826–280,749)   | 234,406<br>(196,742–270,417) | 465,213<br>(368,775–553,542)       |
| Alcohol use                                  | 247,349<br>(221,144–276,088) | 280,924<br>(252,576–309,985) | 271,855<br>(245,586–300,807) | 190,618<br>(167,794–214,854) | 243,705<br>(209,694–276,221)   | 232,408<br>(194,609–268,620) | 461,306<br>(364,931–549,076)       |

**Web table 1: Global deaths attributable to risk factors by age and sex in 2010**

| <b>Risk</b>                                   | <b>Both Sexes,<br/>50-54 Years</b> | <b>Both Sexes,<br/>55-59 Years</b> | <b>Both Sexes,<br/>60-64 Years</b> | <b>Both Sexes,<br/>65-69 Years</b> | <b>Both Sexes,<br/>70-74 Years</b> | <b>Both Sexes,<br/>75-79 Years</b> | <b>Both Sexes,<br/>80+ Years</b>   |
|-----------------------------------------------|------------------------------------|------------------------------------|------------------------------------|------------------------------------|------------------------------------|------------------------------------|------------------------------------|
| Drug use                                      | 13,990<br>(10,465–18,702)          | 11,079<br>(8,422–14,411)           | 8,852<br>(6,899–11,843)            | 2,207<br>(1,423–3,877)             | 2,362<br>(1,597–5,088)             | 2,000<br>(1,373–4,143)             | 3,909<br>(2,477–8,336)             |
| Physiological risk factors                    |                                    |                                    |                                    |                                    |                                    |                                    |                                    |
| High fasting plasma glucose                   | 192,326<br>(162,712–223,215)       | 301,908<br>(257,999–343,811)       | 354,094<br>(305,203–400,759)       | 409,284<br>(352,906–460,699)       | 497,620<br>(433,028–563,987)       | 479,994<br>(415,869–542,922)       | 842,087<br>(725,560–961,107)       |
| High total cholesterol                        | 116,153<br>(88,661–145,847)        | 163,447<br>(125,168–201,847)       | 192,656<br>(148,160–237,907)       | 212,332<br>(162,213–261,149)       | 287,394<br>(213,781–358,893)       | 280,762<br>(199,826–363,786)       | 606,014<br>(465,240–762,497)       |
| High blood pressure                           | 399,896<br>(351,044–450,086)       | 654,736<br>(590,299–716,664)       | 775,057<br>(702,642–847,847)       | 1,001,731<br>(915,284–1,089,574)   | 1,326,834<br>(1,213,244–1,441,000) | 1,479,518<br>(1,357,572–1,602,369) | 3,190,084<br>(2,903,071–3,473,227) |
| High body-mass index                          | 212,132<br>(175,681–249,202)       | 284,645<br>(238,583–332,873)       | 342,743<br>(288,037–400,484)       | 352,399<br>(293,444–415,819)       | 462,281<br>(386,109–543,426)       | 447,723<br>(369,966–528,592)       | 943,703<br>(776,426–1,117,365)     |
| Low bone mineral density                      | 10,798<br>(7,376–14,427)           | 11,833<br>(7,989–15,250)           | 15,570<br>(10,556–20,325)          | 16,721<br>(11,264–21,858)          | 22,365<br>(14,771–29,664)          | 27,860<br>(19,146–35,337)          | 82,439<br>(61,339–99,596)          |
| Dietary risk factors and physical inactivity  | 644,507<br>(585,811–697,969)       | 921,116<br>(843,663–993,658)       | 1,106,313<br>(1,016,853–1,198,794) | 1,297,604<br>(1,195,070–1,404,483) | 1,701,119<br>(1,558,272–1,837,743) | 1,810,127<br>(1,658,017–1,936,517) | 3,858,570<br>(3,539,652–4,173,525) |
| Diet low in fruits                            | 320,139<br>(251,370–383,004)       | 447,203<br>(349,331–535,000)       | 503,150<br>(390,512–601,267)       | 567,807<br>(441,865–684,963)       | 694,866<br>(523,995–852,428)       | 694,529<br>(523,865–848,254)       | 1,190,431<br>(898,921–1,475,735)   |
| Diet low in vegetables                        | 119,259<br>(77,459–160,291)        | 154,768<br>(101,928–209,953)       | 171,837<br>(113,435–232,266)       | 190,875<br>(126,872–258,865)       | 245,311<br>(162,020–330,106)       | 245,167<br>(163,135–328,632)       | 468,027<br>(310,777–634,554)       |
| Diet low in whole grains                      | 111,113<br>(86,150–134,779)        | 149,480<br>(114,624–181,418)       | 168,657<br>(131,997–201,982)       | 184,513<br>(143,699–223,842)       | 237,570<br>(185,147–286,878)       | 239,546<br>(185,978–288,836)       | 447,387<br>(344,595–539,455)       |
| Diet low in nuts and seeds                    | 147,897<br>(97,152–194,197)        | 198,874<br>(126,498–258,779)       | 227,161<br>(144,126–296,077)       | 322,245<br>(160,295–329,883)       | 326,609<br>(203,019–432,509)       | 333,926<br>(207,817–444,484)       | 747,159<br>(444,925–1,013,572)     |
| Diet low in milk                              | 6,196<br>(1,809–10,510)            | 9,064<br>(2,657–15,593)            | 10,726<br>(3,075–18,156)           | 11,840<br>(3,596–19,917)           | 14,541<br>(4,242–24,359)           | 14,428<br>(4,211–24,711)           | 24,644<br>(7,154–41,748)           |
| Diet high in red meat                         | 2,123<br>(609–3,759)               | 3,213<br>(900–5,577)               | 3,901<br>(1,135–6,840)             | 4,366<br>(1,258–7,523)             | 5,620<br>(1,571–9,771)             | 5,680<br>(1,612–9,824)             | 10,186<br>(2,769–17,486)           |
| Diet high in processed meat                   | 55,072<br>(12,134–96,483)          | 70,821<br>(15,903–123,590)         | 79,582<br>(17,881–139,150)         | 83,696<br>(18,480–144,781)         | 106,904<br>(24,368–187,917)        | 106,784<br>(24,369–186,277)        | 250,082<br>(55,778–439,244)        |
| Diet high in sugar-sweetened beverages        | 13,067<br>(4,343–21,137)           | 18,937<br>(5,865–27,568)           | 20,455<br>(6,561–28,996)           | 24,745<br>(17,217–34,142)          | 26,202<br>(18,015–38,916)          | 25,282<br>(17,260–52,334)          | 54,680<br>(27,449–99,390)          |
| Diet low in fibre                             | 50,669<br>(22,454–79,898)          | 64,896<br>(28,876–100,511)         | 69,288<br>(31,496–109,076)         | 72,368<br>(32,224–114,233)         | 93,640<br>(41,841–147,686)         | 96,524<br>(43,505–150,993)         | 205,173<br>(90,134–326,024)        |
| Diet low in calcium                           | 7,278<br>(5,363–9,476)             | 10,802<br>(7,857–13,970)           | 12,879<br>(9,431–16,736)           | 14,518<br>(10,476–18,715)          | 18,098<br>(12,755–23,815)          | 18,487<br>(12,737–24,562)          | 32,114<br>(20,693–44,759)          |
| Diet low in seafood omega-3 fatty acids       | 92,600<br>(66,424–119,004)         | 121,446<br>(88,439–154,611)        | 134,722<br>(95,314–172,333)        | 145,575<br>(107,069–186,547)       | 183,517<br>(132,993–234,887)       | 180,729<br>(130,488–234,087)       | 376,813<br>(269,997–487,697)       |
| Diet low in polyunsaturated fatty acids       | 35,428<br>(16,406–54,366)          | 45,805<br>(21,626–69,737)          | 51,033<br>(23,629–78,275)          | 55,294<br>(25,382–85,803)          | 68,664<br>(31,331–106,753)         | 68,287<br>(31,905–104,462)         | 148,269<br>(69,596–227,690)        |
| Diet high in trans fatty acids                | 36,544<br>(25,998–46,689)          | 45,358<br>(32,389–57,299)          | 51,152<br>(36,748–65,110)          | 53,600<br>(38,825–68,146)          | 63,550<br>(45,742–81,677)          | 62,692<br>(44,977–79,902)          | 137,675<br>(98,838–177,505)        |
| Diet high in sodium                           | 160,935<br>(107,007–211,930)       | 239,505<br>(159,131–314,577)       | 298,843<br>(197,810–390,975)       | 360,688<br>(236,085–478,983)       | 458,805<br>(297,515–610,502)       | 466,938<br>(299,801–623,500)       | 898,562<br>(561,441–1,211,761)     |
| Physical inactivity and low physical activity | 166,062<br>(139,081–193,360)       | 233,944<br>(197,366–271,883)       | 285,323<br>(239,706–332,262)       | 330,531<br>(278,971–384,073)       | 437,261<br>(358,342–514,588)       | 461,360<br>(377,739–551,728)       | 998,419<br>(803,033–1,186,189)     |

**Web table 1: Global deaths attributable to risk factors by age and sex in 2010**

| <b>Risk</b>                                               | <b>Both Sexes,<br/>50-54 Years</b> | <b>Both Sexes,<br/>55-59 Years</b> | <b>Both Sexes,<br/>60-64 Years</b> | <b>Both Sexes,<br/>65-69 Years</b> | <b>Both Sexes,<br/>70-74 Years</b> | <b>Both Sexes,<br/>75-79 Years</b> | <b>Both Sexes,<br/>80+ Years</b> |
|-----------------------------------------------------------|------------------------------------|------------------------------------|------------------------------------|------------------------------------|------------------------------------|------------------------------------|----------------------------------|
| Occupational risk factors                                 | 66,782<br>(50,522–87,875)          | 78,325<br>(57,429–101,849)         | 76,567<br>(52,399–103,659)         | 59,149<br>(37,215–83,170)          | 70,283<br>(43,374–101,420)         | 63,047<br>(36,177–93,649)          | 17,520<br>(11,736–23,165)        |
| Occupational carcinogens                                  | 8,434<br>(5,529–12,084)            | 16,119<br>(10,270–23,451)          | 19,111<br>(12,299–26,963)          | 16,351<br>(10,577–22,534)          | 18,150<br>(11,300–25,242)          | 12,156<br>(7,901–16,412)           | 17,520<br>(11,736–23,165)        |
| Occupational exposure to asbestos                         | 1,815<br>(1,034–2,497)             | 2,759<br>(1,562–3,676)             | 3,796<br>(2,254–4,937)             | 4,214<br>(2,525–5,470)             | 5,136<br>(3,052–6,729)             | 5,118<br>(3,057–6,857)             | 8,540<br>(5,375–11,197)          |
| Occupational exposure to arsenic                          | 210<br>(82–381)                    | 439<br>(166–814)                   | 500<br>(190–938)                   | 384<br>(143–696)                   | 416<br>(158–757)                   | 213<br>(82–394)                    | 284<br>(112–532)                 |
| Occupational exposure to benzene                          | 86<br>(35–154)                     | 142<br>(58–252)                    | 156<br>(65–274)                    | 239<br>(99–416)                    | 273<br>(114–483)                   | 359<br>(148–656)                   | 342<br>(137–607)                 |
| Occupational exposure to beryllium                        | 13<br>(5–22)                       | 27<br>(10–46)                      | 30<br>(12–53)                      | 23<br>(9–39)                       | 26<br>(10–43)                      | 13<br>(5–23)                       | 18<br>(7–31)                     |
| Occupational exposure to cadmium                          | 43<br>(20–72)                      | 91<br>(40–153)                     | 104<br>(47–174)                    | 80<br>(35–130)                     | 87<br>(39–142)                     | 45<br>(20–74)                      | 60<br>(27–100)                   |
| Occupational exposure to chromium                         | 151<br>(89–226)                    | 317<br>(190–476)                   | 361<br>(212–539)                   | 278<br>(160–401)                   | 303<br>(172–447)                   | 155<br>(86–231)                    | 211<br>(116–313)                 |
| Occupational exposure to diesel engine exhaust            | 1,755<br>(969–2,688)               | 3,650<br>(1,999–5,640)             | 4,205<br>(2,339–6,419)             | 3,263<br>(1,752–4,918)             | 3,480<br>(1,808–5,340)             | 1,797<br>(909–2,770)               | 2,286<br>(1,166–3,448)           |
| Occupational exposure to second-hand smoke                | 1,937<br>(1,330–2,630)             | 3,965<br>(2,647–5,404)             | 4,565<br>(3,054–6,210)             | 3,494<br>(2,247–4,640)             | 3,748<br>(2,398–5,047)             | 1,916<br>(1,193–2,576)             | 2,608<br>(1,573–3,518)           |
| Occupational exposure to formaldehyde                     | 35<br>(11–81)                      | 57<br>(19–123)                     | 53<br>(19–109)                     | 75<br>(28–159)                     | 69<br>(27–135)                     | 81<br>(33–151)                     | 54<br>(23–101)                   |
| Occupational exposure to nickel                           | 717<br>(189–1,456)                 | 1,497<br>(388–3,143)               | 1,703<br>(449–3,587)               | 1,316<br>(349–2,658)               | 1,437<br>(377–2,919)               | 740<br>(198–1,520)                 | 996<br>(275–2,104)               |
| Occupational exposure to polycyclic aromatic hydrocarbons | 320<br>(151–525)                   | 670<br>(309–1,122)                 | 767<br>(361–1,272)                 | 592<br>(267–957)                   | 642<br>(296–1,039)                 | 330<br>(149–542)                   | 441<br>(204–721)                 |
| Occupational exposure to silica                           | 1,264<br>(790–1,775)               | 2,664<br>(1,619–3,731)             | 3,068<br>(1,878–4,265)             | 2,403<br>(1,432–3,294)             | 2,580<br>(1,465–3,582)             | 1,345<br>(736–1,897)               | 1,703<br>(949–2,362)             |
| Occupational exposure to sulfuric acid                    | 317<br>(95–697)                    | 452<br>(137–994)                   | 504<br>(152–1,079)                 | 409<br>(115–890)                   | 407<br>(118–884)                   | 202<br>(54–437)                    | 258<br>(72–569)                  |
| Occupational asthmagens                                   | 3,429<br>(2,175–6,213)             | 4,420<br>(2,938–8,152)             | 4,545<br>(3,010–7,968)             | 3,734<br>(2,412–6,663)             | 4,289<br>(2,797–7,245)             | 4,043<br>(2,640–6,860)             | 0<br>(0–0)                       |
| Occupational particulate matter, gases, and fumes         | 16,308<br>(7,418–25,630)           | 27,579<br>(12,893–42,740)          | 35,929<br>(16,528–57,533)          | 31,724<br>(13,724–51,720)          | 42,535<br>(18,474–69,270)          | 45,183<br>(20,103–73,379)          | 0<br>(0–0)                       |
| Occupational noise                                        | 0<br>(0–0)                         | 0<br>(0–0)                         | 0<br>(0–0)                         | 0<br>(0–0)                         | 0<br>(0–0)                         | 0<br>(0–0)                         | 0<br>(0–0)                       |
| Occupational risk factors for injuries                    | 38,611<br>(27,657–56,561)          | 30,208<br>(21,348–43,821)          | 16,982<br>(12,144–24,063)          | 7,340<br>(5,214–10,759)            | 5,310<br>(3,801–7,576)             | 1,664<br>(1,213–2,405)             | 0<br>(0–0)                       |
| Occupational low back pain                                | 0<br>(0–0)                         | 0<br>(0–0)                         | 0<br>(0–0)                         | 0<br>(0–0)                         | 0<br>(0–0)                         | 0<br>(0–0)                         | 0<br>(0–0)                       |
| Sexual abuse and violence                                 | 16,691<br>(9,424–25,921)           | 14,856<br>(8,175–23,045)           | 12,739<br>(6,609–19,983)           | 10,636<br>(5,175–17,573)           | 10,329<br>(5,092–16,265)           | 8,007<br>(3,980–12,754)            | 11,021<br>(4,950–19,051)         |
| Childhood sexual abuse                                    | 5,644<br>(3,271–8,352)             | 4,859<br>(2,876–7,353)             | 3,878<br>(2,272–6,015)             | 2,894<br>(1,655–4,540)             | 2,409<br>(1,384–3,807)             | 1,685<br>(968–2,636)               | 1,734<br>(964–2,823)             |
| Intimate partner violence                                 | 11,896<br>(4,891–20,523)           | 10,741<br>(3,973–18,753)           | 9,510<br>(3,537–16,855)            | 8,269<br>(2,925–14,994)            | 8,395<br>(3,058–14,562)            | 6,628<br>(2,454–11,276)            | 9,613<br>(3,366–17,719)          |

**Web table 1: Global deaths attributable to risk factors by age and sex in 2010**

| Risk                                         | Males,<br>All Ages                 | Males,<br>0-6 Days        | Males,<br>7-27 Days       | Males,<br>28-364 Days        | Males,<br>1-4 Years          | Males,<br>5-9 Years    | Males,<br>10-14 Years  |
|----------------------------------------------|------------------------------------|---------------------------|---------------------------|------------------------------|------------------------------|------------------------|------------------------|
| Unimproved water and sanitation              | 171,097<br>(6,841–326,262)         | 3,256<br>(133–6,725)      | 6,162<br>(249–12,545)     | 41,197<br>(1,645–80,748)     | 31,452<br>(1,365–62,074)     | 7,407<br>(298–15,257)  | 3,772<br>(159–7,992)   |
| Unimproved water source                      | 59,463<br>(3,880–120,264)          | 1,304<br>(86–2,768)       | 2,331<br>(147–4,840)      | 16,231<br>(1,057–33,057)     | 12,614<br>(807–25,209)       | 2,561<br>(166–5,392)   | 1,223<br>(79–2,722)    |
| Unimproved sanitation                        | 123,255<br>(2,924–242,588)         | 2,208<br>(53–4,828)       | 4,299<br>(108–9,051)      | 28,121<br>(687–57,251)       | 21,386<br>(523–44,365)       | 5,338<br>(127–11,347)  | 2,778<br>(68–6,088)    |
| Air pollution                                |                                    |                           |                           |                              |                              |                        |                        |
| Ambient particulate matter pollution         | 1,850,428<br>(1,614,010–2,082,474) | 9,864<br>(5,776–15,458)   | 7,848<br>(4,833–11,830)   | 32,496<br>(21,487–45,961)    | 20,244<br>(12,743–30,639)    | 0<br>(0–0)             | 0<br>(0–0)             |
| Household air pollution from solid fuels     | 1,867,043<br>(1,359,090–2,452,588) | 33,516<br>(20,455–50,767) | 25,343<br>(16,582–36,042) | 114,984<br>(77,458–155,115)  | 72,093<br>(49,492–106,401)   | 0<br>(0–0)             | 0<br>(0–0)             |
| Ambient ozone pollution                      | 86,335<br>(30,551–153,776)         | 0<br>(0–0)                | 0<br>(0–0)                | 0<br>(0–0)                   | 0<br>(0–0)                   | 0<br>(0–0)             | 0<br>(0–0)             |
| Other environmental risks                    | 426,280<br>(341,744–541,465)       | 0<br>(0–0)                | 0<br>(0–0)                | 0<br>(0–0)                   | 0<br>(0–0)                   | 0<br>(0–0)             | 0<br>(0–0)             |
| Residential radon                            | 70,014<br>(9,140–154,460)          | 0<br>(0–0)                | 0<br>(0–0)                | 0<br>(0–0)                   | 0<br>(0–0)                   | 0<br>(0–0)             | 0<br>(0–0)             |
| Lead exposure                                | 356,266<br>(292,587–435,046)       | 0<br>(0–0)                | 0<br>(0–0)                | 0<br>(0–0)                   | 0<br>(0–0)                   | 0<br>(0–0)             | 0<br>(0–0)             |
| Child and maternal undernutrition            | 739,863<br>(570,560–909,248)       | 0<br>(0–0)                | 50,064<br>(29,003–71,177) | 385,843<br>(295,253–483,200) | 278,752<br>(211,907–359,030) | 747<br>(517–1,077)     | 590<br>(414–832)       |
| Suboptimal breastfeeding                     | 293,449<br>(175,623–429,772)       | 0<br>(0–0)                | 50,064<br>(29,003–71,177) | 224,974<br>(130,674–336,168) | 18,411<br>(1,702–42,066)     | 0<br>(0–0)             | 0<br>(0–0)             |
| Non-exclusive breastfeeding                  | 257,771<br>(143,116–382,459)       | 0<br>(0–0)                | 50,064<br>(29,003–71,177) | 207,707<br>(113,863–313,552) | 0<br>(0–0)                   | 0<br>(0–0)             | 0<br>(0–0)             |
| Discontinued breastfeeding                   | 35,678<br>(3,475–79,940)           | 0<br>(0–0)                | 0<br>(0–0)                | 17,267<br>(1,599–39,711)     | 18,411<br>(1,702–42,066)     | 0<br>(0–0)             | 0<br>(0–0)             |
| Childhood underweight                        | 458,639<br>(366,866–561,352)       | 0<br>(0–0)                | 0<br>(0–0)                | 242,188<br>(189,566–299,472) | 216,451<br>(167,965–276,346) | 0<br>(0–0)             | 0<br>(0–0)             |
| Iron deficiency                              | 32,287<br>(21,925–37,449)          | 0<br>(0–0)                | 0<br>(0–0)                | 2,631<br>(1,769–3,874)       | 4,453<br>(2,957–6,919)       | 747<br>(517–1,077)     | 590<br>(414–832)       |
| Vitamin A deficiency                         | 63,291<br>(32,070–104,030)         | 0<br>(0–0)                | 0<br>(0–0)                | 15,377<br>(6,877–26,936)     | 47,913<br>(24,771–79,872)    | 0<br>(0–0)             | 0<br>(0–0)             |
| Zinc deficiency                              | 52,390<br>(9,382–105,728)          | 0<br>(0–0)                | 0<br>(0–0)                | 0<br>(0–0)                   | 52,390<br>(9,382–105,728)    | 0<br>(0–0)             | 0<br>(0–0)             |
| Tobacco smoking, including second-hand smoke | 4,507,059<br>(3,757,779–5,092,460) | 9,133<br>(5,668–14,018)   | 7,293<br>(4,596–10,497)   | 33,825<br>(22,595–46,692)    | 18,899<br>(11,980–27,536)    | 0<br>(0–0)             | 0<br>(0–0)             |
| Tobacco smoking                              | 4,251,424<br>(3,503,674–4,850,554) | 0<br>(0–0)                | 0<br>(0–0)                | 0<br>(0–0)                   | 0<br>(0–0)                   | 0<br>(0–0)             | 0<br>(0–0)             |
| Second-hand smoke                            | 255,634<br>(191,587–314,541)       | 9,133<br>(5,668–14,018)   | 7,293<br>(4,596–10,497)   | 33,825<br>(22,595–46,692)    | 18,899<br>(11,980–27,536)    | 0<br>(0–0)             | 0<br>(0–0)             |
| Alcohol and drug use                         | 1,925,525<br>(1,712,465–2,132,787) | 338<br>(229–622)          | 294<br>(155–562)          | 1,599<br>(891–3,117)         | 4,206<br>(2,652–6,792)       | 1,558<br>(1,176–2,204) | 1,419<br>(1,123–1,870) |
| Alcohol use                                  | 1,824,119<br>(1,613,616–2,029,574) | 120<br>(73–218)           | 65<br>(35–133)            | 574<br>(371–991)             | 2,971<br>(1,733–5,225)       | 1,209<br>(881–1,714)   | 1,123<br>(865–1,463)   |

**Web table 1: Global deaths attributable to risk factors by age and sex in 2010**

| Risk                                          | Males,<br>All Ages                 | Males,<br>0-6 Days | Males,<br>7-27 Days | Males,<br>28-364 Days | Males,<br>1-4 Years  | Males,<br>5-9 Years | Males,<br>10-14 Years |
|-----------------------------------------------|------------------------------------|--------------------|---------------------|-----------------------|----------------------|---------------------|-----------------------|
| Drug use                                      | 109,420<br>(82,297–152,421)        | 218<br>(104–456)   | 229<br>(99–482)     | 1,025<br>(406–2,503)  | 1,235<br>(480–2,271) | 349<br>(190–737)    | 296<br>(156–654)      |
| Physiological risk factors                    |                                    |                    |                     |                       |                      |                     |                       |
| High fasting plasma glucose                   | 1,749,058<br>(1,455,169–2,039,206) | 0<br>(0–0)         | 0<br>(0–0)          | 0<br>(0–0)            | 0<br>(0–0)           | 0<br>(0–0)          | 0<br>(0–0)            |
| High total cholesterol                        | 961,614<br>(714,774–1,236,023)     | 0<br>(0–0)         | 0<br>(0–0)          | 0<br>(0–0)            | 0<br>(0–0)           | 0<br>(0–0)          | 0<br>(0–0)            |
| High blood pressure                           | 4,750,581<br>(4,272,529–5,273,576) | 0<br>(0–0)         | 0<br>(0–0)          | 0<br>(0–0)            | 0<br>(0–0)           | 0<br>(0–0)          | 0<br>(0–0)            |
| High body-mass index                          | 1,632,766<br>(1,328,501–1,941,988) | 0<br>(0–0)         | 0<br>(0–0)          | 0<br>(0–0)            | 0<br>(0–0)           | 0<br>(0–0)          | 0<br>(0–0)            |
| Low bone mineral density                      | 103,440<br>(67,743–124,596)        | 0<br>(0–0)         | 0<br>(0–0)          | 0<br>(0–0)            | 0<br>(0–0)           | 0<br>(0–0)          | 0<br>(0–0)            |
| Dietary risk factors and physical inactivity  | 6,570,516<br>(6,063,034–7,098,471) | 0<br>(0–0)         | 0<br>(0–0)          | 0<br>(0–0)            | 0<br>(0–0)           | 0<br>(0–0)          | 0<br>(0–0)            |
| Diet low in fruits                            | 2,837,481<br>(2,203,651–3,414,649) | 0<br>(0–0)         | 0<br>(0–0)          | 0<br>(0–0)            | 0<br>(0–0)           | 0<br>(0–0)          | 0<br>(0–0)            |
| Diet low in vegetables                        | 1,017,500<br>(687,787–1,378,721)   | 0<br>(0–0)         | 0<br>(0–0)          | 0<br>(0–0)            | 0<br>(0–0)           | 0<br>(0–0)          | 0<br>(0–0)            |
| Diet low in whole grains                      | 963,640<br>(748,116–1,162,721)     | 0<br>(0–0)         | 0<br>(0–0)          | 0<br>(0–0)            | 0<br>(0–0)           | 0<br>(0–0)          | 0<br>(0–0)            |
| Diet low in nuts and seeds                    | 1,389,433<br>(890,869–1,817,734)   | 0<br>(0–0)         | 0<br>(0–0)          | 0<br>(0–0)            | 0<br>(0–0)           | 0<br>(0–0)          | 0<br>(0–0)            |
| Diet low in milk                              | 54,093<br>(16,106–91,527)          | 0<br>(0–0)         | 0<br>(0–0)          | 0<br>(0–0)            | 0<br>(0–0)           | 0<br>(0–0)          | 0<br>(0–0)            |
| Diet high in red meat                         | 21,330<br>(6,175–37,340)           | 0<br>(0–0)         | 0<br>(0–0)          | 0<br>(0–0)            | 0<br>(0–0)           | 0<br>(0–0)          | 0<br>(0–0)            |
| Diet high in processed meat                   | 473,562<br>(103,608–842,923)       | 0<br>(0–0)         | 0<br>(0–0)          | 0<br>(0–0)            | 0<br>(0–0)           | 0<br>(0–0)          | 0<br>(0–0)            |
| Diet high in sugar-sweetened beverages        | 117,874<br>(76,219–170,172)        | 0<br>(0–0)         | 0<br>(0–0)          | 0<br>(0–0)            | 0<br>(0–0)           | 0<br>(0–0)          | 0<br>(0–0)            |
| Diet low in fibre                             | 441,895<br>(201,062–693,234)       | 0<br>(0–0)         | 0<br>(0–0)          | 0<br>(0–0)            | 0<br>(0–0)           | 0<br>(0–0)          | 0<br>(0–0)            |
| Diet low in calcium                           | 76,413<br>(51,653–103,188)         | 0<br>(0–0)         | 0<br>(0–0)          | 0<br>(0–0)            | 0<br>(0–0)           | 0<br>(0–0)          | 0<br>(0–0)            |
| Diet low in seafood omega-3 fatty acids       | 793,650<br>(574,241–1,010,930)     | 0<br>(0–0)         | 0<br>(0–0)          | 0<br>(0–0)            | 0<br>(0–0)           | 0<br>(0–0)          | 0<br>(0–0)            |
| Diet low in polyunsaturated fatty acids       | 306,296<br>(140,873–473,149)       | 0<br>(0–0)         | 0<br>(0–0)          | 0<br>(0–0)            | 0<br>(0–0)           | 0<br>(0–0)          | 0<br>(0–0)            |
| Diet high in trans fatty acids                | 293,087<br>(209,155–371,284)       | 0<br>(0–0)         | 0<br>(0–0)          | 0<br>(0–0)            | 0<br>(0–0)           | 0<br>(0–0)          | 0<br>(0–0)            |
| Diet high in sodium                           | 1,732,870<br>(1,122,107–2,301,781) | 0<br>(0–0)         | 0<br>(0–0)          | 0<br>(0–0)            | 0<br>(0–0)           | 0<br>(0–0)          | 0<br>(0–0)            |
| Physical inactivity and low physical activity | 1,547,833<br>(1,264,464–1,835,192) | 0<br>(0–0)         | 0<br>(0–0)          | 0<br>(0–0)            | 0<br>(0–0)           | 0<br>(0–0)          | 0<br>(0–0)            |

**Web table 1: Global deaths attributable to risk factors by age and sex in 2010**

| Risk                                                      | Males,<br>All Ages           | Males,<br>0-6 Days | Males,<br>7-27 Days | Males,<br>28-364 Days | Males,<br>1-4 Years | Males,<br>5-9 Years | Males,<br>10-14 Years |
|-----------------------------------------------------------|------------------------------|--------------------|---------------------|-----------------------|---------------------|---------------------|-----------------------|
| Occupational risk factors                                 | 749,857<br>(580,954–941,322) | 0<br>(0–0)         | 0<br>(0–0)          | 0<br>(0–0)            | 0<br>(0–0)          | 0<br>(0–0)          | 0<br>(0–0)            |
| Occupational carcinogens                                  | 92,154<br>(57,261–127,678)   | 0<br>(0–0)         | 0<br>(0–0)          | 0<br>(0–0)            | 0<br>(0–0)          | 0<br>(0–0)          | 0<br>(0–0)            |
| Occupational exposure to asbestos                         | 26,563<br>(14,454–36,593)    | 0<br>(0–0)         | 0<br>(0–0)          | 0<br>(0–0)            | 0<br>(0–0)          | 0<br>(0–0)          | 0<br>(0–0)            |
| Occupational exposure to arsenic                          | 1,915<br>(717–3,496)         | 0<br>(0–0)         | 0<br>(0–0)          | 0<br>(0–0)            | 0<br>(0–0)          | 0<br>(0–0)          | 0<br>(0–0)            |
| Occupational exposure to benzene                          | 1,542<br>(618–2,706)         | 0<br>(0–0)         | 0<br>(0–0)          | 0<br>(0–0)            | 0<br>(0–0)          | 0<br>(0–0)          | 0<br>(0–0)            |
| Occupational exposure to beryllium                        | 114<br>(44–192)              | 0<br>(0–0)         | 0<br>(0–0)          | 0<br>(0–0)            | 0<br>(0–0)          | 0<br>(0–0)          | 0<br>(0–0)            |
| Occupational exposure to cadmium                          | 410<br>(179–670)             | 0<br>(0–0)         | 0<br>(0–0)          | 0<br>(0–0)            | 0<br>(0–0)          | 0<br>(0–0)          | 0<br>(0–0)            |
| Occupational exposure to chromium                         | 1,361<br>(720–2,014)         | 0<br>(0–0)         | 0<br>(0–0)          | 0<br>(0–0)            | 0<br>(0–0)          | 0<br>(0–0)          | 0<br>(0–0)            |
| Occupational exposure to diesel engine exhaust            | 18,773<br>(9,641–28,714)     | 0<br>(0–0)         | 0<br>(0–0)          | 0<br>(0–0)            | 0<br>(0–0)          | 0<br>(0–0)          | 0<br>(0–0)            |
| Occupational exposure to second-hand smoke                | 17,189<br>(10,127–23,037)    | 0<br>(0–0)         | 0<br>(0–0)          | 0<br>(0–0)            | 0<br>(0–0)          | 0<br>(0–0)          | 0<br>(0–0)            |
| Occupational exposure to formaldehyde                     | 486<br>(185–939)             | 0<br>(0–0)         | 0<br>(0–0)          | 0<br>(0–0)            | 0<br>(0–0)          | 0<br>(0–0)          | 0<br>(0–0)            |
| Occupational exposure to nickel                           | 6,443<br>(1,616–13,317)      | 0<br>(0–0)         | 0<br>(0–0)          | 0<br>(0–0)            | 0<br>(0–0)          | 0<br>(0–0)          | 0<br>(0–0)            |
| Occupational exposure to polycyclic aromatic hydrocarbons | 3,092<br>(1,394–5,028)       | 0<br>(0–0)         | 0<br>(0–0)          | 0<br>(0–0)            | 0<br>(0–0)          | 0<br>(0–0)          | 0<br>(0–0)            |
| Occupational exposure to silica                           | 14,205<br>(8,244–19,702)     | 0<br>(0–0)         | 0<br>(0–0)          | 0<br>(0–0)            | 0<br>(0–0)          | 0<br>(0–0)          | 0<br>(0–0)            |
| Occupational exposure to sulfuric acid                    | 2,606<br>(718–5,761)         | 0<br>(0–0)         | 0<br>(0–0)          | 0<br>(0–0)            | 0<br>(0–0)          | 0<br>(0–0)          | 0<br>(0–0)            |
| Occupational asthmagens                                   | 25,364<br>(15,642–48,748)    | 0<br>(0–0)         | 0<br>(0–0)          | 0<br>(0–0)            | 0<br>(0–0)          | 0<br>(0–0)          | 0<br>(0–0)            |
| Occupational particulate matter, gases, and fumes         | 171,553<br>(79,656–270,369)  | 0<br>(0–0)         | 0<br>(0–0)          | 0<br>(0–0)            | 0<br>(0–0)          | 0<br>(0–0)          | 0<br>(0–0)            |
| Occupational noise                                        | 0<br>(0–0)                   | 0<br>(0–0)         | 0<br>(0–0)          | 0<br>(0–0)            | 0<br>(0–0)          | 0<br>(0–0)          | 0<br>(0–0)            |
| Occupational risk factors for injuries                    | 460,785<br>(343,904–618,319) | 0<br>(0–0)         | 0<br>(0–0)          | 0<br>(0–0)            | 0<br>(0–0)          | 0<br>(0–0)          | 0<br>(0–0)            |
| Occupational low back pain                                | 0<br>(0–0)                   | 0<br>(0–0)         | 0<br>(0–0)          | 0<br>(0–0)            | 0<br>(0–0)          | 0<br>(0–0)          | 0<br>(0–0)            |
| Sexual abuse and violence                                 | 37,429<br>(21,366–56,607)    | 0<br>(0–0)         | 0<br>(0–0)          | 0<br>(0–0)            | 0<br>(0–0)          | 9<br>(4–16)         | 293<br>(131–574)      |
| Childhood sexual abuse                                    | 37,429<br>(21,366–56,607)    | 0<br>(0–0)         | 0<br>(0–0)          | 0<br>(0–0)            | 0<br>(0–0)          | 9<br>(4–16)         | 293<br>(131–574)      |
| Intimate partner violence                                 | 0<br>(0–0)                   | 0<br>(0–0)         | 0<br>(0–0)          | 0<br>(0–0)            | 0<br>(0–0)          | 0<br>(0–0)          | 0<br>(0–0)            |



**Web table 1: Global deaths attributable to risk factors by age and sex in 2010**

| Risk                                         | Males,<br>15-19 Years     | Males,<br>20-24 Years     | Males,<br>25-29 Years      | Males,<br>30-34 Years      | Males,<br>35-39 Years        | Males,<br>40-44 Years        | Males,<br>45-49 Years        |
|----------------------------------------------|---------------------------|---------------------------|----------------------------|----------------------------|------------------------------|------------------------------|------------------------------|
| Unimproved water and sanitation              | 4,198<br>(143-9,165)      | 4,548<br>(172-9,351)      | 4,909<br>(181-10,222)      | 4,749<br>(181-9,713)       | 4,520<br>(158-9,193)         | 4,150<br>(142-8,810)         | 4,411<br>(136-9,257)         |
| Unimproved water source                      | 1,385<br>(84-3,088)       | 1,532<br>(93-3,335)       | 1,666<br>(97-3,636)        | 1,586<br>(105-3,319)       | 1,446<br>(96-3,048)          | 1,296<br>(78-2,883)          | 1,340<br>(85-2,903)          |
| Unimproved sanitation                        | 3,072<br>(62-6,849)       | 3,304<br>(72-6,901)       | 3,560<br>(83-7,664)        | 3,466<br>(79-7,288)        | 3,349<br>(68-6,994)          | 3,103<br>(61-6,784)          | 3,332<br>(57-7,393)          |
| Air pollution                                |                           |                           |                            |                            |                              |                              |                              |
| Ambient particulate matter pollution         | 0<br>(0-0)                | 0<br>(0-0)                | 13,059<br>(9,124-17,095)   | 19,468<br>(13,850-25,400)  | 32,310<br>(23,268-41,544)    | 57,842<br>(42,349-73,195)    | 81,776<br>(59,736-103,678)   |
| Household air pollution from solid fuels     | 0<br>(0-0)                | 0<br>(0-0)                | 13,864<br>(9,453-20,086)   | 20,344<br>(13,647-28,720)  | 31,996<br>(21,614-44,792)    | 55,558<br>(36,651-76,779)    | 75,245<br>(51,083-104,126)   |
| Ambient ozone pollution                      | 0<br>(0-0)                | 0<br>(0-0)                | 209<br>(59-454)            | 260<br>(78-554)            | 431<br>(139-871)             | 746<br>(224-1,487)           | 1,345<br>(449-2,770)         |
| Other environmental risks                    | 0<br>(0-0)                | 0<br>(0-0)                | 2,175<br>(1,619-3,534)     | 3,604<br>(2,775-5,833)     | 6,281<br>(4,915-8,475)       | 10,748<br>(8,324-15,098)     | 17,574<br>(13,608-22,319)    |
| Residential radon                            | 0<br>(0-0)                | 0<br>(0-0)                | 118<br>(12-311)            | 227<br>(26-564)            | 516<br>(58-1,250)            | 1,284<br>(142-3,042)         | 2,662<br>(324-6,136)         |
| Lead exposure                                | 0<br>(0-0)                | 0<br>(0-0)                | 2,057<br>(1,522-3,417)     | 3,376<br>(2,550-5,492)     | 5,765<br>(4,457-7,899)       | 9,465<br>(7,503-12,796)      | 14,911<br>(11,825-18,504)    |
| Child and maternal undernutrition            | 1,059<br>(704-1,545)      | 1,402<br>(917-2,066)      | 1,406<br>(1,004-1,925)     | 1,298<br>(854-1,917)       | 1,138<br>(733-1,605)         | 960<br>(597-1,402)           | 1,017<br>(673-1,363)         |
| Suboptimal breastfeeding                     | 0<br>(0-0)                | 0<br>(0-0)                | 0<br>(0-0)                 | 0<br>(0-0)                 | 0<br>(0-0)                   | 0<br>(0-0)                   | 0<br>(0-0)                   |
| Non-exclusive breastfeeding                  | 0<br>(0-0)                | 0<br>(0-0)                | 0<br>(0-0)                 | 0<br>(0-0)                 | 0<br>(0-0)                   | 0<br>(0-0)                   | 0<br>(0-0)                   |
| Discontinued breastfeeding                   | 0<br>(0-0)                | 0<br>(0-0)                | 0<br>(0-0)                 | 0<br>(0-0)                 | 0<br>(0-0)                   | 0<br>(0-0)                   | 0<br>(0-0)                   |
| Childhood underweight                        | 0<br>(0-0)                | 0<br>(0-0)                | 0<br>(0-0)                 | 0<br>(0-0)                 | 0<br>(0-0)                   | 0<br>(0-0)                   | 0<br>(0-0)                   |
| Iron deficiency                              | 1,059<br>(704-1,545)      | 1,402<br>(917-2,066)      | 1,406<br>(1,004-1,925)     | 1,298<br>(854-1,917)       | 1,138<br>(733-1,605)         | 960<br>(597-1,402)           | 1,017<br>(673-1,363)         |
| Vitamin A deficiency                         | 0<br>(0-0)                | 0<br>(0-0)                | 0<br>(0-0)                 | 0<br>(0-0)                 | 0<br>(0-0)                   | 0<br>(0-0)                   | 0<br>(0-0)                   |
| Zinc deficiency                              | 0<br>(0-0)                | 0<br>(0-0)                | 0<br>(0-0)                 | 0<br>(0-0)                 | 0<br>(0-0)                   | 0<br>(0-0)                   | 0<br>(0-0)                   |
| Tobacco smoking, including second-hand smoke | 0<br>(0-0)                | 0<br>(0-0)                | 1,426<br>(930-1,955)       | 38,180<br>(30,013-49,605)  | 68,311<br>(48,598-89,061)    | 137,134<br>(106,845-169,336) | 217,668<br>(184,804-253,378) |
| Tobacco smoking                              | 0<br>(0-0)                | 0<br>(0-0)                | 0<br>(0-0)                 | 36,211<br>(28,169-47,605)  | 66,201<br>(46,625-86,784)    | 133,319<br>(103,444-165,767) | 211,777<br>(177,868-248,269) |
| Second-hand smoke                            | 0<br>(0-0)                | 0<br>(0-0)                | 1,426<br>(930-1,955)       | 1,970<br>(1,330-2,641)     | 2,110<br>(1,350-2,935)       | 3,815<br>(2,519-5,169)       | 5,891<br>(3,893-7,894)       |
| Alcohol and drug use                         | 38,563<br>(31,110-46,931) | 74,852<br>(61,576-88,688) | 88,525<br>(74,000-104,140) | 88,326<br>(75,290-102,223) | 127,398<br>(109,623-148,187) | 146,079<br>(127,034-166,826) | 176,125<br>(153,669-199,416) |
| Alcohol use                                  | 36,023<br>(28,686-44,345) | 66,575<br>(53,884-80,300) | 75,692<br>(61,830-91,071)  | 75,466<br>(63,389-88,672)  | 114,330<br>(96,927-134,353)  | 133,418<br>(115,195-153,720) | 164,804<br>(142,796-187,607) |
| Drug use                                     | 2,708<br>(1,702-4,240)    | 8,849<br>(5,488-13,026)   | 13,569<br>(9,058-20,138)   | 13,347<br>(9,801-18,933)   | 13,672<br>(10,046-19,520)    | 13,431<br>(9,309-19,341)     | 12,253<br>(8,517-18,010)     |

**Web table 1: Global deaths attributable to risk factors by age and sex in 2010**

| Risk                                          | Males,<br>15-19 Years     | Males,<br>20-24 Years     | Males,<br>25-29 Years     | Males,<br>30-34 Years     | Males,<br>35-39 Years      | Males,<br>40-44 Years        | Males,<br>45-49 Years        |
|-----------------------------------------------|---------------------------|---------------------------|---------------------------|---------------------------|----------------------------|------------------------------|------------------------------|
| Physiological risk factors                    |                           |                           |                           |                           |                            |                              |                              |
| High fasting plasma glucose                   | 0<br>(0-0)                | 0<br>(0-0)                | 9,901<br>(7,505-12,477)   | 13,608<br>(10,431-17,367) | 28,366<br>(22,365-35,573)  | 43,525<br>(34,134-53,740)    | 85,873<br>(69,876-103,704)   |
| High total cholesterol                        | 0<br>(0-0)                | 0<br>(0-0)                | 4,703<br>(2,938-6,753)    | 7,320<br>(4,556-10,658)   | 18,355<br>(12,896-24,595)  | 32,174<br>(22,504-42,847)    | 54,479<br>(39,181-70,286)    |
| High blood pressure                           | 0<br>(0-0)                | 0<br>(0-0)                | 23,298<br>(18,104-28,561) | 31,944<br>(25,005-39,087) | 59,130<br>(48,434-69,901)  | 97,391<br>(80,184-115,463)   | 180,199<br>(154,934-205,789) |
| High body-mass index                          | 0<br>(0-0)                | 0<br>(0-0)                | 12,157<br>(9,196-15,622)  | 16,711<br>(12,729-21,185) | 31,328<br>(24,828-38,622)  | 54,686<br>(43,043-66,893)    | 86,827<br>(70,457-103,360)   |
| Low bone mineral density                      | 0<br>(0-0)                | 0<br>(0-0)                | 0<br>(0-0)                | 0<br>(0-0)                | 0<br>(0-0)                 | 0<br>(0-0)                   | 0<br>(0-0)                   |
| Dietary risk factors and physical inactivity  |                           |                           |                           |                           |                            |                              |                              |
| Diet low in fruits                            | 0<br>(0-0)                | 0<br>(0-0)                | 35,775<br>(30,556-41,618) | 55,301<br>(47,935-63,601) | 93,118<br>(80,632-105,415) | 169,927<br>(148,808-190,803) | 271,516<br>(239,838-301,992) |
| Diet low in vegetables                        | 0<br>(0-0)                | 0<br>(0-0)                | 19,874<br>(14,870-24,853) | 29,885<br>(22,425-37,212) | 49,633<br>(37,410-61,376)  | 90,254<br>(68,401-111,241)   | 141,261<br>(104,788-172,610) |
| Diet low in whole grains                      | 0<br>(0-0)                | 0<br>(0-0)                | 9,940<br>(6,263-13,739)   | 14,296<br>(9,348-19,342)  | 22,058<br>(14,051-30,076)  | 37,172<br>(23,576-50,374)    | 55,966<br>(35,880-75,432)    |
| Diet low in nuts and seeds                    | 0<br>(0-0)                | 0<br>(0-0)                | 8,865<br>(6,554-11,311)   | 13,120<br>(9,625-16,912)  | 20,786<br>(15,332-26,314)  | 35,936<br>(27,093-44,622)    | 52,617<br>(39,643-65,517)    |
| Diet low in milk                              | 0<br>(0-0)                | 0<br>(0-0)                | 10,840<br>(7,088-14,546)  | 16,990<br>(10,851-22,591) | 27,525<br>(17,647-37,205)  | 48,363<br>(31,724-64,208)    | 72,155<br>(46,283-95,082)    |
| Diet high in red meat                         | 0<br>(0-0)                | 0<br>(0-0)                | 337<br>(102-598)          | 515<br>(145-899)          | 829<br>(230-1,429)         | 1,285<br>(356-2,168)         | 2,159<br>(631-3,739)         |
| Diet high in processed meat                   | 0<br>(0-0)                | 0<br>(0-0)                | 92<br>(26-166)            | 151<br>(43-274)           | 266<br>(76-487)            | 440<br>(124-802)             | 769<br>(213-1,372)           |
| Diet high in sugar-sweetened beverages        | 0<br>(0-0)                | 0<br>(0-0)                | 4,035<br>(825-7,543)      | 6,296<br>(1,295-11,996)   | 9,758<br>(1,931-17,999)    | 17,177<br>(3,311-33,518)     | 26,751<br>(5,612-48,323)     |
| Diet low in fibre                             | 0<br>(0-0)                | 0<br>(0-0)                | 1,842<br>(905-2,915)      | 2,472<br>(1,060-3,650)    | 3,122<br>(1,122-5,701)     | 4,872<br>(1,546-8,733)       | 6,532<br>(2,071-10,796)      |
| Diet low in calcium                           | 0<br>(0-0)                | 0<br>(0-0)                | 4,516<br>(1,990-7,213)    | 6,793<br>(2,989-10,900)   | 10,936<br>(4,590-17,052)   | 18,285<br>(7,950-28,926)     | 26,734<br>(11,345-43,301)    |
| Diet low in seafood omega-3 fatty acids       | 0<br>(0-0)                | 0<br>(0-0)                | 433<br>(307-598)          | 651<br>(444-892)          | 1,038<br>(735-1,436)       | 1,577<br>(1,121-2,210)       | 2,606<br>(1,914-3,501)       |
| Diet low in polyunsaturated fatty acids       | 0<br>(0-0)                | 0<br>(0-0)                | 7,267<br>(5,020-9,668)    | 11,303<br>(7,753-15,221)  | 18,064<br>(12,431-23,928)  | 31,385<br>(22,735-41,519)    | 46,077<br>(31,792-60,511)    |
| Diet high in trans fatty acids                | 0<br>(0-0)                | 0<br>(0-0)                | 3,052<br>(1,397-4,815)    | 4,609<br>(2,079-7,122)    | 7,193<br>(3,254-11,135)    | 12,162<br>(5,536-18,859)     | 17,753<br>(7,889-27,298)     |
| Diet high in sodium                           | 0<br>(0-0)                | 0<br>(0-0)                | 3,165<br>(2,134-4,261)    | 4,813<br>(3,184-6,401)    | 7,360<br>(5,073-9,657)     | 12,476<br>(8,723-16,506)     | 18,222<br>(12,354-23,844)    |
| Physical inactivity and low physical activity | 0<br>(0-0)                | 0<br>(0-0)                | 6,145<br>(2,652-9,797)    | 10,937<br>(6,103-16,090)  | 20,661<br>(12,841-28,952)  | 40,830<br>(25,960-56,616)    | 67,522<br>(43,642-90,846)    |
| Occupational risk factors                     | 30,897<br>(22,755-43,753) | 59,546<br>(43,537-82,538) | 67,075<br>(48,822-92,167) | 62,390<br>(45,483-85,090) | 59,786<br>(42,943-81,343)  | 57,322<br>(42,078-78,741)    | 56,109<br>(41,872-75,614)    |
| Occupational carcinogens                      | 168<br>(99-245)           | 261<br>(152-391)          | 350<br>(209-519)          | 434<br>(270-618)          | 779<br>(479-1,155)         | 3,668<br>(1,059-2,442)       | 3,668<br>(2,230-5,277)       |

**Web table 1: Global deaths attributable to risk factors by age and sex in 2010**

| Risk                                                      | Males,<br>15-19 Years     | Males,<br>20-24 Years     | Males,<br>25-29 Years     | Males,<br>30-34 Years     | Males,<br>35-39 Years     | Males,<br>40-44 Years     | Males,<br>45-49 Years     |
|-----------------------------------------------------------|---------------------------|---------------------------|---------------------------|---------------------------|---------------------------|---------------------------|---------------------------|
| Occupational exposure to asbestos                         | 78<br>(35-115)            | 90<br>(39-133)            | 96<br>(39-150)            | 116<br>(52-170)           | 175<br>(86-250)           | 350<br>(184-500)          | 761<br>(382-1,092)        |
| Occupational exposure to arsenic                          | 0<br>(0-0)                | 0<br>(0-0)                | 3<br>(1-5)                | 5<br>(2-10)               | 15<br>(5-30)              | 36<br>(13-68)             | 83<br>(31-158)            |
| Occupational exposure to benzene                          | 74<br>(30-137)            | 139<br>(57-253)           | 129<br>(54-232)           | 112<br>(47-204)           | 62<br>(26-115)            | 70<br>(29-122)            | 41<br>(17-74)             |
| Occupational exposure to beryllium                        | 0<br>(0-0)                | 0<br>(0-0)                | 0<br>(0-0)                | 0<br>(0-1)                | 1<br>(0-2)                | 2<br>(1-4)                | 5<br>(2-9)                |
| Occupational exposure to cadmium                          | 0<br>(0-0)                | 0<br>(0-0)                | 1<br>(0-1)                | 1<br>(0-2)                | 3<br>(1-6)                | 7<br>(3-13)               | 18<br>(8-30)              |
| Occupational exposure to chromium                         | 0<br>(0-0)                | 0<br>(0-0)                | 2<br>(1-3)                | 4<br>(2-6)                | 11<br>(6-17)              | 25<br>(14-39)             | 59<br>(32-89)             |
| Occupational exposure to diesel engine exhaust            | 0<br>(0-0)                | 0<br>(0-0)                | 28<br>(13-46)             | 52<br>(26-85)             | 154<br>(79-253)           | 354<br>(189-569)          | 827<br>(445-1,288)        |
| Occupational exposure to second-hand smoke                | 0<br>(0-0)                | 0<br>(0-0)                | 26<br>(14-39)             | 48<br>(28-70)             | 142<br>(80-214)           | 326<br>(207-463)          | 763<br>(479-1,055)        |
| Occupational exposure to formaldehyde                     | 16<br>(7-28)              | 33<br>(13-58)             | 34<br>(14-61)             | 32<br>(13-59)             | 23<br>(9-49)              | 34<br>(10-79)             | 22<br>(7-54)              |
| Occupational exposure to nickel                           | 0<br>(0-0)                | 0<br>(0-0)                | 9<br>(2-19)               | 17<br>(4-35)              | 50<br>(12-111)            | 118<br>(28-255)           | 278<br>(69-589)           |
| Occupational exposure to polycyclic aromatic hydrocarbons | 0<br>(0-0)                | 0<br>(0-0)                | 4<br>(2-8)                | 8<br>(3-14)               | 24<br>(11-42)             | 57<br>(25-98)             | 134<br>(60-225)           |
| Occupational exposure to silica                           | 0<br>(0-0)                | 0<br>(0-0)                | 20<br>(11-32)             | 38<br>(22-58)             | 113<br>(63-177)           | 262<br>(162-387)          | 613<br>(365-878)          |
| Occupational exposure to sulfuric acid                    | 0<br>(0-0)                | 0<br>(0-0)                | 2<br>(1-4)                | 5<br>(1-12)               | 22<br>(6-52)              | 72<br>(20-162)            | 168<br>(46-387)           |
| Occupational asthmagens                                   | 269<br>(128-576)          | 556<br>(287-1,166)        | 823<br>(465-1,587)        | 831<br>(465-1,684)        | 1,058<br>(573-2,264)      | 1,296<br>(713-2,485)      | 1,909<br>(1,054-4,107)    |
| Occupational particulate matter, gases, and fumes         | 0<br>(0-0)                | 0<br>(0-0)                | 992<br>(448-1,753)        | 1,268<br>(555-2,212)      | 2,055<br>(916-3,559)      | 3,574<br>(1,620-5,874)    | 6,363<br>(2,961-10,436)   |
| Occupational noise                                        | 0<br>(0-0)                |
| Occupational risk factors for injuries                    | 30,460<br>(22,317-43,258) | 58,729<br>(42,785-81,552) | 64,909<br>(46,698-89,988) | 59,857<br>(42,865-82,675) | 55,894<br>(39,199-77,032) | 50,774<br>(35,551-71,986) | 44,170<br>(30,439-63,300) |
| Occupational low back pain                                | 0<br>(0-0)                |
| Sexual abuse and violence                                 | 2,331<br>(1,131-4,143)    | 3,942<br>(1,941-6,810)    | 3,504<br>(1,795-5,779)    | 3,194<br>(1,618-5,416)    | 3,245<br>(1,709-5,251)    | 3,430<br>(1,823-5,475)    | 3,653<br>(2,016-5,638)    |
| Childhood sexual abuse                                    | 2,331<br>(1,131-4,143)    | 3,942<br>(1,941-6,810)    | 3,504<br>(1,795-5,779)    | 3,194<br>(1,618-5,416)    | 3,245<br>(1,709-5,251)    | 3,430<br>(1,823-5,475)    | 3,653<br>(2,016-5,638)    |
| Intimate partner violence                                 | 0<br>(0-0)                |

**Web table 1: Global deaths attributable to risk factors by age and sex in 2010**

| Risk                                         | Males,<br>50-54 Years        | Males,<br>55-59 Years        | Males,<br>60-64 Years        | Males,<br>65-69 Years        | Males,<br>70-74 Years        | Males,<br>75-79 Years        | Males,<br>80+ Years          |
|----------------------------------------------|------------------------------|------------------------------|------------------------------|------------------------------|------------------------------|------------------------------|------------------------------|
| Unimproved water and sanitation              | 4,643<br>(191-9,859)         | 5,174<br>(205-10,815)        | 6,173<br>(215-13,974)        | 6,079<br>(222-13,225)        | 7,404<br>(301-16,673)        | 6,418<br>(213-14,877)        | 10,474<br>(360-23,428)       |
| Unimproved water source                      | 1,405<br>(90-3,026)          | 1,503<br>(98-3,182)          | 1,786<br>(103-3,960)         | 1,762<br>(117-3,825)         | 2,022<br>(135-4,473)         | 1,755<br>(108-3,944)         | 2,714<br>(158-6,335)         |
| Unimproved sanitation                        | 3,511<br>(94-7,723)          | 3,966<br>(102-8,605)         | 4,743<br>(112-11,215)        | 4,664<br>(105-10,765)        | 5,780<br>(171-13,688)        | 5,004<br>(109-12,197)        | 8,272<br>(195-19,113)        |
| Air pollution                                |                              |                              |                              |                              |                              |                              |                              |
| Ambient particulate matter pollution         | 127,169<br>(93,334-161,188)  | 179,124<br>(133,821-224,895) | 203,822<br>(152,740-252,420) | 219,748<br>(159,663-275,644) | 256,499<br>(180,369-322,622) | 241,632<br>(174,831-299,398) | 347,525<br>(255,518-430,025) |
| Household air pollution from solid fuels     | 117,956<br>(78,861-164,898)  | 163,376<br>(105,929-231,404) | 189,482<br>(125,372-260,580) | 213,555<br>(134,464-300,639) | 240,190<br>(144,717-346,039) | 218,172<br>(127,765-312,619) | 281,368<br>(163,766-417,520) |
| Ambient ozone pollution                      | 2,735<br>(893-5,182)         | 4,794<br>(1,565-8,890)       | 7,585<br>(2,552-14,008)      | 11,113<br>(3,720-20,128)     | 14,821<br>(5,215-26,638)     | 15,922<br>(5,458-28,654)     | 26,374<br>(8,873-47,294)     |
| Other environmental risks                    | 29,378<br>(22,642-38,423)    | 42,285<br>(31,729-55,349)    | 50,140<br>(38,124-65,755)    | 55,910<br>(42,897-72,465)    | 64,110<br>(50,023-82,928)    | 60,171<br>(47,892-76,757)    | 83,904<br>(68,225-102,566)   |
| Residential radon                            | 5,081<br>(638-11,274)        | 8,358<br>(1,026-19,168)      | 10,053<br>(1,288-22,176)     | 10,552<br>(1,339-23,633)     | 11,536<br>(1,533-25,026)     | 9,792<br>(1,312-21,581)      | 9,834<br>(1,413-20,831)      |
| Lead exposure                                | 24,297<br>(19,439-30,701)    | 33,926<br>(26,936-42,244)    | 40,087<br>(32,258-49,351)    | 45,359<br>(36,636-56,025)    | 52,574<br>(42,958-64,356)    | 50,379<br>(40,932-61,397)    | 74,070<br>(61,144-89,314)    |
| Child and maternal undernutrition            | 1,038<br>(679-1,398)         | 1,218<br>(811-1,603)         | 1,560<br>(1,009-2,117)       | 1,834<br>(1,133-2,440)       | 2,053<br>(1,339-2,714)       | 2,213<br>(1,416-2,854)       | 5,669<br>(3,290-6,938)       |
| Suboptimal breastfeeding                     | 0<br>(0-0)                   |
| Non-exclusive breastfeeding                  | 0<br>(0-0)                   |
| Discontinued breastfeeding                   | 0<br>(0-0)                   |
| Childhood underweight                        | 0<br>(0-0)                   |
| Iron deficiency                              | 1,038<br>(679-1,398)         | 1,218<br>(811-1,603)         | 1,560<br>(1,009-2,117)       | 1,834<br>(1,133-2,440)       | 2,053<br>(1,339-2,714)       | 2,213<br>(1,416-2,854)       | 5,669<br>(3,290-6,938)       |
| Vitamin A deficiency                         | 0<br>(0-0)                   |
| Zinc deficiency                              | 0<br>(0-0)                   |
| Tobacco smoking, including second-hand smoke | 340,583<br>(290,889-394,217) | 484,316<br>(408,106-554,018) | 560,603<br>(470,087-636,632) | 591,788<br>(486,989-678,088) | 659,896<br>(524,301-768,322) | 587,796<br>(443,721-680,679) | 750,208<br>(584,726-898,656) |
| Tobacco smoking                              | 330,521<br>(281,007-385,490) | 469,393<br>(392,179-543,488) | 541,743<br>(449,871-618,366) | 569,168<br>(464,559-654,631) | 629,964<br>(493,901-740,028) | 558,902<br>(414,668-653,248) | 704,226<br>(535,667-857,500) |
| Second-hand smoke                            | 10,063<br>(6,905-13,086)     | 14,923<br>(10,361-19,173)    | 18,860<br>(12,927-24,632)    | 22,620<br>(15,219-29,146)    | 29,932<br>(20,314-38,702)    | 28,894<br>(19,241-37,738)    | 45,981<br>(30,872-60,348)    |
| Alcohol and drug use                         | 203,407<br>(178,502-230,107) | 217,105<br>(191,587-243,688) | 199,851<br>(176,918-224,100) | 127,948<br>(108,828-147,886) | 140,786<br>(117,958-162,107) | 120,027<br>(97,855-141,270)  | 167,120<br>(127,728-204,736) |
| Alcohol use                                  | 194,918<br>(171,039-219,987) | 211,035<br>(185,935-236,622) | 195,425<br>(172,828-219,982) | 126,619<br>(108,011-146,001) | 139,516<br>(116,762-160,507) | 118,908<br>(97,111-139,986)  | 165,326<br>(126,300-202,899) |

**Web table 1: Global deaths attributable to risk factors by age and sex in 2010**

| Risk                                          | Males,<br>50-54 Years        | Males,<br>55-59 Years        | Males,<br>60-64 Years        | Males,<br>65-69 Years        | Males,<br>70-74 Years          | Males,<br>75-79 Years          | Males,<br>80+ Years                |
|-----------------------------------------------|------------------------------|------------------------------|------------------------------|------------------------------|--------------------------------|--------------------------------|------------------------------------|
| Drug use                                      | 9,646<br>(6,828–13,328)      | 7,368<br>(5,414–9,930)       | 5,697<br>(4,242–7,827)       | 1,338<br>(652–2,672)         | 1,274<br>(763–2,784)           | 1,121<br>(648–2,534)           | 1,795<br>(973–4,305)               |
| Physiological risk factors                    |                              |                              |                              |                              |                                |                                |                                    |
| High fasting plasma glucose                   | 124,691<br>(100,351–150,143) | 186,995<br>(151,862–221,598) | 208,525<br>(171,068–246,530) | 223,154<br>(184,750–262,154) | 254,236<br>(211,791–299,949)   | 232,021<br>(192,249–272,383)   | 338,164<br>(283,419–395,815)       |
| High total cholesterol                        | 82,273<br>(59,286–107,727)   | 106,731<br>(77,033–137,047)  | 117,584<br>(85,672–150,711)  | 116,063<br>(85,765–151,608)  | 137,913<br>(101,253–180,520)   | 117,356<br>(83,483–156,711)    | 166,663<br>(123,137–215,142)       |
| High blood pressure                           | 268,540<br>(230,941–307,290) | 426,583<br>(377,690–478,409) | 484,557<br>(430,239–543,729) | 585,618<br>(523,284–651,406) | 712,775<br>(640,455–791,885)   | 722,554<br>(645,334–804,015)   | 1,157,993<br>(1,038,632–1,292,163) |
| High body-mass index                          | 132,629<br>(108,023–158,194) | 167,955<br>(137,578–199,344) | 193,842<br>(159,346–229,552) | 187,678<br>(151,484–224,817) | 229,523<br>(185,009–274,165)   | 200,418<br>(160,887–241,928)   | 319,011<br>(255,236–385,200)       |
| Low bone mineral density                      | 7,868<br>(4,854–11,283)      | 8,183<br>(4,844–11,223)      | 10,963<br>(6,407–15,521)     | 10,626<br>(6,167–14,853)     | 14,406<br>(7,873–21,038)       | 14,890<br>(8,784–20,482)       | 36,503<br>(23,181–46,291)          |
| Dietary risk factors and physical inactivity  | 433,011<br>(383,699–476,911) | 611,106<br>(548,110–665,568) | 708,224<br>(638,806–778,914) | 789,537<br>(713,556–867,663) | 954,955<br>(850,714–1,049,676) | 936,138<br>(846,688–1,021,527) | 1,511,907<br>(1,369,515–1,656,791) |
| Diet low in fruits                            | 221,921<br>(170,124–270,024) | 306,808<br>(236,792–371,260) | 333,964<br>(257,262–406,618) | 358,390<br>(278,150–438,455) | 407,003<br>(295,523–502,322)   | 375,202<br>(272,844–462,090)   | 503,285<br>(370,638–637,399)       |
| Diet low in vegetables                        | 83,393<br>(53,760–112,043)   | 106,615<br>(69,023–144,742)  | 113,885<br>(76,781–155,547)  | 119,048<br>(78,163–163,234)  | 140,286<br>(92,862–192,202)    | 128,632<br>(85,041–176,538)    | 186,209<br>(124,383–253,499)       |
| Diet low in whole grains                      | 77,962<br>(59,255–96,282)    | 102,203<br>(77,726–125,342)  | 110,025<br>(84,274–133,154)  | 113,727<br>(86,648–140,325)  | 133,206<br>(102,318–162,180)   | 122,536<br>(95,086–149,449)    | 172,658<br>(132,998–209,301)       |
| Diet low in nuts and seeds                    | 109,675<br>(70,183–144,557)  | 142,332<br>(89,984–185,398)  | 153,047<br>(96,957–198,397)  | 159,169<br>(100,448–209,195) | 185,938<br>(116,453–246,214)   | 174,359<br>(107,050–230,928)   | 289,041<br>(176,517–393,769)       |
| Diet low in milk                              | 3,400<br>(1,006–5,768)       | 5,216<br>(1,554–9,047)       | 6,292<br>(1,831–10,723)      | 6,992<br>(2,127–11,812)      | 8,241<br>(2,471–13,859)        | 7,870<br>(2,313–13,279)        | 10,957<br>(3,230–18,335)           |
| Diet high in red meat                         | 1,235<br>(361–2,233)         | 1,946<br>(541–3,436)         | 2,418<br>(684–4,231)         | 2,714<br>(793–4,751)         | 3,353<br>(972–5,840)           | 3,237<br>(918–5,661)           | 4,710<br>(1,291–8,329)             |
| Diet high in processed meat                   | 40,536<br>(8,515–72,767)     | 50,327<br>(10,475–91,165)    | 53,883<br>(11,743–97,852)    | 53,113<br>(11,558–95,287)    | 60,906<br>(13,767–108,416)     | 55,600<br>(12,848–98,545)      | 95,180<br>(21,363–169,670)         |
| Diet high in sugar-sweetened beverages        | 9,488<br>(2,765–15,942)      | 12,919<br>(3,715–18,724)     | 13,456<br>(3,965–19,185)     | 14,551<br>(9,609–24,842)     | 14,204<br>(9,619–28,005)       | 12,672<br>(7,943–29,274)       | 21,745<br>(10,927–41,727)          |
| Diet low in fibre                             | 37,755<br>(16,485–60,408)    | 47,053<br>(20,768–73,524)    | 48,026<br>(21,456–76,064)    | 47,543<br>(21,140–75,301)    | 56,126<br>(25,264–89,553)      | 53,160<br>(24,378–83,508)      | 84,968<br>(37,563–135,464)         |
| Diet low in calcium                           | 4,134<br>(2,997–5,532)       | 6,486<br>(4,640–8,563)       | 7,991<br>(5,704–10,624)      | 9,230<br>(6,428–12,326)      | 11,369<br>(7,628–15,507)       | 11,613<br>(7,674–15,935)       | 19,285<br>(11,181–29,487)          |
| Diet low in seafood omega-3 fatty acids       | 68,608<br>(48,461–88,706)    | 86,737<br>(62,222–112,001)   | 90,486<br>(63,840–115,885)   | 91,504<br>(65,685–118,681)   | 103,757<br>(74,908–134,397)    | 93,661<br>(67,507–122,103)     | 144,800<br>(102,772–189,021)       |
| Diet low in polyunsaturated fatty acids       | 26,168<br>(12,070–40,253)    | 32,726<br>(15,236–49,530)    | 34,368<br>(15,651–53,432)    | 34,923<br>(16,067–54,284)    | 39,387<br>(17,777–61,730)      | 36,059<br>(16,485–55,115)      | 57,895<br>(26,178–89,993)          |
| Diet high in trans fatty acids                | 26,272<br>(18,350–34,150)    | 31,702<br>(22,154–40,481)    | 33,647<br>(23,670–42,938)    | 33,098<br>(23,492–42,316)    | 35,765<br>(25,244–46,289)      | 32,683<br>(23,432–41,909)      | 53,885<br>(38,353–69,211)          |
| Diet high in sodium                           | 111,331<br>(73,763–148,158)  | 163,777<br>(108,009–218,045) | 197,482<br>(130,634–261,613) | 226,880<br>(147,417–305,091) | 267,488<br>(173,087–361,561)   | 250,981<br>(162,689–335,386)   | 368,837<br>(229,457–500,045)       |
| Physical inactivity and low physical activity | 100,659<br>(82,098–121,201)  | 139,523<br>(112,811–166,449) | 165,031<br>(134,938–197,025) | 182,714<br>(148,983–218,534) | 223,250<br>(181,013–268,672)   | 218,553<br>(173,655–263,335)   | 354,459<br>(278,366–433,836)       |

**Web table 1: Global deaths attributable to risk factors by age and sex in 2010**

| Risk                                                      | Males,<br>50-54 Years     | Males,<br>55-59 Years     | Males,<br>60-64 Years     | Males,<br>65-69 Years     | Males,<br>70-74 Years     | Males,<br>75-79 Years     | Males,<br>80+ Years      |
|-----------------------------------------------------------|---------------------------|---------------------------|---------------------------|---------------------------|---------------------------|---------------------------|--------------------------|
| Occupational risk factors                                 | 58,488<br>(43,694–77,800) | 66,039<br>(48,678–87,395) | 62,194<br>(43,636–83,538) | 48,844<br>(30,686–68,434) | 57,276<br>(35,000–82,281) | 51,020<br>(28,843–76,026) | 12,872<br>(7,739–17,075) |
| Occupational carcinogens                                  | 6,564<br>(4,100–9,627)    | 12,721<br>(7,642–18,595)  | 15,274<br>(9,267–21,928)  | 13,214<br>(8,021–18,305)  | 14,468<br>(8,558–20,471)  | 9,702<br>(5,787–13,270)   | 12,872<br>(7,739–17,075) |
| Occupational exposure to asbestos                         | 1,436<br>(730–2,044)      | 2,232<br>(1,118–3,111)    | 3,122<br>(1,683–4,271)    | 3,475<br>(1,897–4,804)    | 4,209<br>(2,314–5,740)    | 4,132<br>(2,244–5,737)    | 6,291<br>(3,471–8,868)   |
| Occupational exposure to arsenic                          | 148<br>(55–275)           | 317<br>(114–604)          | 367<br>(137–694)          | 287<br>(103–531)          | 304<br>(107–572)          | 158<br>(55–297)           | 191<br>(66–344)          |
| Occupational exposure to benzene                          | 49<br>(20–87)             | 80<br>(32–144)            | 90<br>(37–160)            | 141<br>(58–250)           | 161<br>(66–289)           | 210<br>(83–376)           | 183<br>(70–326)          |
| Occupational exposure to beryllium                        | 9<br>(3–15)               | 19<br>(7–33)              | 22<br>(8–38)              | 17<br>(6–29)              | 18<br>(7–31)              | 9<br>(4–16)               | 12<br>(4–19)             |
| Occupational exposure to cadmium                          | 31<br>(14–54)             | 67<br>(29–116)            | 78<br>(34–132)            | 61<br>(26–102)            | 65<br>(25–109)            | 34<br>(14–57)             | 42<br>(17–68)            |
| Occupational exposure to chromium                         | 105<br>(56–161)           | 225<br>(120–344)          | 261<br>(140–396)          | 204<br>(109–301)          | 216<br>(106–320)          | 113<br>(54–172)           | 138<br>(67–205)          |
| Occupational exposure to diesel engine exhaust            | 1,470<br>(784–2,316)      | 3,095<br>(1,588–4,896)    | 3,592<br>(1,908–5,547)    | 2,819<br>(1,476–4,323)    | 2,972<br>(1,413–4,528)    | 1,552<br>(731–2,422)      | 1,860<br>(870–2,795)     |
| Occupational exposure to second-hand smoke                | 1,352<br>(799–1,867)      | 2,831<br>(1,697–3,890)    | 3,306<br>(1,970–4,512)    | 2,574<br>(1,502–3,501)    | 2,700<br>(1,500–3,643)    | 1,405<br>(759–1,925)      | 1,716<br>(897–2,310)     |
| Occupational exposure to formaldehyde                     | 25<br>(7–62)              | 41<br>(12–95)             | 38<br>(12–80)             | 52<br>(18–124)            | 47<br>(18–99)             | 54<br>(20–107)            | 34<br>(14–64)            |
| Occupational exposure to nickel                           | 497<br>(123–1,041)        | 1,063<br>(264–2,265)      | 1,231<br>(308–2,619)      | 965<br>(236–2,017)        | 1,027<br>(263–2,170)      | 537<br>(137–1,139)        | 650<br>(166–1,314)       |
| Occupational exposure to polycyclic aromatic hydrocarbons | 238<br>(107–407)          | 509<br>(221–871)          | 592<br>(269–991)          | 463<br>(202–764)          | 492<br>(201–812)          | 257<br>(107–427)          | 313<br>(130–507)         |
| Occupational exposure to silica                           | 1,093<br>(633–1,567)      | 2,327<br>(1,345–3,323)    | 2,701<br>(1,569–3,801)    | 2,135<br>(1,212–2,970)    | 2,269<br>(1,219–3,131)    | 1,193<br>(622–1,701)      | 1,443<br>(739–2,034)     |
| Occupational exposure to sulfuric acid                    | 296<br>(87–661)           | 416<br>(117–935)          | 458<br>(126–1,003)        | 380<br>(104–843)          | 370<br>(100–806)          | 186<br>(47–412)           | 230<br>(59–518)          |
| Occupational asthmagens                                   | 2,550<br>(1,442–5,262)    | 3,308<br>(1,940–6,649)    | 3,397<br>(1,975–6,609)    | 2,897<br>(1,638–5,547)    | 3,351<br>(1,952–6,104)    | 3,120<br>(1,841–5,698)    | 0<br>(0–0)               |
| Occupational particulate matter, gases, and fumes         | 12,430<br>(5,571–20,280)  | 20,993<br>(9,785–33,515)  | 27,263<br>(12,603–43,581) | 25,660<br>(11,227–42,444) | 34,355<br>(14,711–56,196) | 36,602<br>(16,388–59,772) | 0<br>(0–0)               |
| Occupational noise                                        | 0<br>(0–0)                | 0<br>(0–0)                | 0<br>(0–0)                | 0<br>(0–0)                | 0<br>(0–0)                | 0<br>(0–0)                | 0<br>(0–0)               |
| Occupational risk factors for injuries                    | 36,944<br>(25,997–54,782) | 29,017<br>(20,092–42,674) | 16,260<br>(11,428–23,253) | 7,074<br>(4,985–10,501)   | 5,102<br>(3,611–7,358)    | 1,597<br>(1,141–2,328)    | 0<br>(0–0)               |
| Occupational low back pain                                | 0<br>(0–0)                | 0<br>(0–0)                | 0<br>(0–0)                | 0<br>(0–0)                | 0<br>(0–0)                | 0<br>(0–0)                | 0<br>(0–0)               |
| Sexual abuse and violence                                 | 3,662<br>(2,050–5,759)    | 3,063<br>(1,797–4,773)    | 2,343<br>(1,313–3,724)    | 1,660<br>(908–2,751)      | 1,295<br>(723–2,099)      | 933<br>(512–1,568)        | 871<br>(455–1,478)       |
| Childhood sexual abuse                                    | 3,662<br>(2,050–5,759)    | 3,063<br>(1,797–4,773)    | 2,343<br>(1,313–3,724)    | 1,660<br>(908–2,751)      | 1,295<br>(723–2,099)      | 933<br>(512–1,568)        | 871<br>(455–1,478)       |
| Intimate partner violence                                 | 0<br>(0–0)                | 0<br>(0–0)                | 0<br>(0–0)                | 0<br>(0–0)                | 0<br>(0–0)                | 0<br>(0–0)                | 0<br>(0–0)               |

**Web table 1: Global deaths attributable to risk factors by age and sex in 2010**

| Risk                                         | Females,<br>All Ages               | Females,<br>0-6 Days      | Females,<br>7-27 Days     | Females,<br>28-364 Days      | Females,<br>1-4 Years        | Females,<br>5-9 Years | Females,<br>10-14 Years |
|----------------------------------------------|------------------------------------|---------------------------|---------------------------|------------------------------|------------------------------|-----------------------|-------------------------|
| Unimproved water and sanitation              | 166,379<br>(6,690–326,989)         | 2,486<br>(115–5,121)      | 5,399<br>(247–10,811)     | 37,293<br>(1,650–71,821)     | 28,444<br>(1,255–54,936)     | 6,344<br>(231–12,717) | 3,573<br>(125–7,544)    |
| Unimproved water source                      | 56,663<br>(3,604–115,704)          | 964<br>(66–2,059)         | 2,021<br>(137–4,275)      | 14,344<br>(959–29,230)       | 10,853<br>(738–22,200)       | 2,141<br>(139–4,491)  | 1,143<br>(68–2,439)     |
| Unimproved sanitation                        | 120,851<br>(3,104–242,452)         | 1,715<br>(47–3,670)       | 3,784<br>(104–7,939)      | 25,763<br>(671–51,893)       | 19,784<br>(528–39,677)       | 4,616<br>(106–9,548)  | 2,647<br>(64–5,669)     |
| Air pollution                                |                                    |                           |                           |                              |                              |                       |                         |
| Ambient particulate matter pollution         | 1,373,113<br>(1,187,639–1,563,793) | 6,662<br>(3,937–10,672)   | 6,005<br>(3,584–8,867)    | 27,053<br>(18,012–37,966)    | 17,013<br>(11,236–24,454)    | 0<br>(0–0)            | 0<br>(0–0)              |
| Household air pollution from solid fuels     | 1,611,730<br>(1,243,516–2,027,067) | 22,596<br>(14,681–32,927) | 19,501<br>(13,030–26,806) | 93,432<br>(63,350–125,781)   | 56,881<br>(39,463–77,353)    | 0<br>(0–0)            | 0<br>(0–0)              |
| Ambient ozone pollution                      | 66,100<br>(21,362–115,225)         | 0<br>(0–0)                | 0<br>(0–0)                | 0<br>(0–0)                   | 0<br>(0–0)                   | 0<br>(0–0)            | 0<br>(0–0)              |
| Other environmental risks                    | 346,751<br>(281,555–413,370)       | 0<br>(0–0)                | 0<br>(0–0)                | 0<br>(0–0)                   | 0<br>(0–0)                   | 0<br>(0–0)            | 0<br>(0–0)              |
| Residential radon                            | 28,978<br>(4,098–64,387)           | 0<br>(0–0)                | 0<br>(0–0)                | 0<br>(0–0)                   | 0<br>(0–0)                   | 0<br>(0–0)            | 0<br>(0–0)              |
| Lead exposure                                | 317,772<br>(265,722–376,431)       | 0<br>(0–0)                | 0<br>(0–0)                | 0<br>(0–0)                   | 0<br>(0–0)                   | 0<br>(0–0)            | 0<br>(0–0)              |
| Child and maternal undernutrition            | 698,442<br>(569,013–832,012)       | 0<br>(0–0)                | 40,772<br>(24,682–57,769) | 335,794<br>(266,439–415,246) | 240,002<br>(188,315–295,877) | 661<br>(421–980)      | 662<br>(424–951)        |
| Suboptimal breastfeeding                     | 251,368<br>(155,884–359,651)       | 0<br>(0–0)                | 40,772<br>(24,682–57,769) | 192,774<br>(113,804–283,795) | 17,822<br>(1,764–39,193)     | 0<br>(0–0)            | 0<br>(0–0)              |
| Non-exclusive breastfeeding                  | 218,117<br>(126,383–319,470)       | 0<br>(0–0)                | 40,772<br>(24,682–57,769) | 177,345<br>(99,818–265,103)  | 0<br>(0–0)                   | 0<br>(0–0)            | 0<br>(0–0)              |
| Discontinued breastfeeding                   | 33,251<br>(3,091–73,804)           | 0<br>(0–0)                | 0<br>(0–0)                | 15,429<br>(1,413–35,943)     | 17,822<br>(1,764–39,193)     | 0<br>(0–0)            | 0<br>(0–0)              |
| Childhood underweight                        | 401,478<br>(325,516–484,452)       | 0<br>(0–0)                | 0<br>(0–0)                | 214,663<br>(170,258–260,520) | 186,815<br>(147,489–233,477) | 0<br>(0–0)            | 0<br>(0–0)              |
| Iron deficiency                              | 87,321<br>(62,505–107,021)         | 0<br>(0–0)                | 0<br>(0–0)                | 2,101<br>(1,348–3,035)       | 3,346<br>(2,190–5,010)       | 661<br>(421–980)      | 662<br>(424–951)        |
| Vitamin A deficiency                         | 56,472<br>(28,192–91,464)          | 0<br>(0–0)                | 0<br>(0–0)                | 14,568<br>(6,442–25,937)     | 41,903<br>(20,972–69,222)    | 0<br>(0–0)            | 0<br>(0–0)              |
| Zinc deficiency                              | 44,940<br>(7,696–87,711)           | 0<br>(0–0)                | 0<br>(0–0)                | 0<br>(0–0)                   | 44,940<br>(7,696–87,711)     | 0<br>(0–0)            | 0<br>(0–0)              |
| Tobacco smoking, including second-hand smoke | 1,790,228<br>(1,278,666–2,094,260) | 6,261<br>(3,828–9,577)    | 5,671<br>(3,688–8,005)    | 27,743<br>(18,423–37,658)    | 15,824<br>(10,557–21,745)    | 0<br>(0–0)            | 0<br>(0–0)              |
| Tobacco smoking                              | 1,443,924<br>(920,763–1,743,849)   | 0<br>(0–0)                | 0<br>(0–0)                | 0<br>(0–0)                   | 0<br>(0–0)                   | 0<br>(0–0)            | 0<br>(0–0)              |
| Second-hand smoke                            | 346,304<br>(252,702–439,439)       | 6,261<br>(3,828–9,577)    | 5,671<br>(3,688–8,005)    | 27,743<br>(18,423–37,658)    | 15,824<br>(10,557–21,745)    | 0<br>(0–0)            | 0<br>(0–0)              |
| Alcohol and drug use                         | 956,819<br>(793,785–1,121,300)     | 205<br>(124–354)          | 172<br>(89–283)           | 1,152<br>(691–1,709)         | 3,134<br>(1,851–4,913)       | 962<br>(697–1,334)    | 868<br>(666–1,178)      |
| Alcohol use                                  | 911,393<br>(748,254–1,076,004)     | 102<br>(57–213)           | 49<br>(24–114)            | 443<br>(271–725)             | 1,902<br>(1,066–3,120)       | 738<br>(530–1,046)    | 611<br>(457–803)        |

**Web table 1: Global deaths attributable to risk factors by age and sex in 2010**

| Risk                                          | Females,<br>All Ages               | Females,<br>0-6 Days | Females,<br>7-27 Days | Females,<br>28-364 Days | Females,<br>1-4 Years | Females,<br>5-9 Years | Females,<br>10-14 Years |
|-----------------------------------------------|------------------------------------|----------------------|-----------------------|-------------------------|-----------------------|-----------------------|-------------------------|
| Drug use                                      | 48,385<br>(36,780–64,303)          | 103<br>(43–198)      | 123<br>(49–195)       | 709<br>(318–1,210)      | 1,232<br>(475–2,319)  | 224<br>(100–460)      | 257<br>(141–501)        |
| Physiological risk factors                    |                                    |                      |                       |                         |                       |                       |                         |
| High fasting plasma glucose                   | 1,607,214<br>(1,367,465–1,839,764) | 0<br>(0–0)           | 0<br>(0–0)            | 0<br>(0–0)              | 0<br>(0–0)            | 0<br>(0–0)            | 0<br>(0–0)              |
| High total cholesterol                        | 1,057,196<br>(793,595–1,350,633)   | 0<br>(0–0)           | 0<br>(0–0)            | 0<br>(0–0)              | 0<br>(0–0)            | 0<br>(0–0)            | 0<br>(0–0)              |
| High blood pressure                           | 4,645,279<br>(4,198,029–5,092,003) | 0<br>(0–0)           | 0<br>(0–0)            | 0<br>(0–0)              | 0<br>(0–0)            | 0<br>(0–0)            | 0<br>(0–0)              |
| High body-mass index                          | 1,738,466<br>(1,454,008–2,036,059) | 0<br>(0–0)           | 0<br>(0–0)            | 0<br>(0–0)              | 0<br>(0–0)            | 0<br>(0–0)            | 0<br>(0–0)              |
| Low bone mineral density                      | 84,146<br>(57,863–102,441)         | 0<br>(0–0)           | 0<br>(0–0)            | 0<br>(0–0)              | 0<br>(0–0)            | 0<br>(0–0)            | 0<br>(0–0)              |
| Dietary risk factors and physical inactivity  | 5,717,934<br>(5,274,690–6,181,117) | 0<br>(0–0)           | 0<br>(0–0)            | 0<br>(0–0)              | 0<br>(0–0)            | 0<br>(0–0)            | 0<br>(0–0)              |
| Diet low in fruits                            | 2,064,761<br>(1,593,495–2,507,876) | 0<br>(0–0)           | 0<br>(0–0)            | 0<br>(0–0)              | 0<br>(0–0)            | 0<br>(0–0)            | 0<br>(0–0)              |
| Diet low in vegetables                        | 779,754<br>(521,285–1,040,304)     | 0<br>(0–0)           | 0<br>(0–0)            | 0<br>(0–0)              | 0<br>(0–0)            | 0<br>(0–0)            | 0<br>(0–0)              |
| Diet low in whole grains                      | 762,171<br>(592,879–919,709)       | 0<br>(0–0)           | 0<br>(0–0)            | 0<br>(0–0)              | 0<br>(0–0)            | 0<br>(0–0)            | 0<br>(0–0)              |
| Diet low in nuts and seeds                    | 1,082,390<br>(663,158–1,441,054)   | 0<br>(0–0)           | 0<br>(0–0)            | 0<br>(0–0)              | 0<br>(0–0)            | 0<br>(0–0)            | 0<br>(0–0)              |
| Diet low in milk                              | 46,858<br>(13,085–80,413)          | 0<br>(0–0)           | 0<br>(0–0)            | 0<br>(0–0)              | 0<br>(0–0)            | 0<br>(0–0)            | 0<br>(0–0)              |
| Diet high in red meat                         | 16,762<br>(4,306–29,007)           | 0<br>(0–0)           | 0<br>(0–0)            | 0<br>(0–0)              | 0<br>(0–0)            | 0<br>(0–0)            | 0<br>(0–0)              |
| Diet high in processed meat                   | 367,296<br>(83,446–637,120)        | 0<br>(0–0)           | 0<br>(0–0)            | 0<br>(0–0)              | 0<br>(0–0)            | 0<br>(0–0)            | 0<br>(0–0)              |
| Diet high in sugar-sweetened beverages        | 92,906<br>(50,832–146,921)         | 0<br>(0–0)           | 0<br>(0–0)            | 0<br>(0–0)              | 0<br>(0–0)            | 0<br>(0–0)            | 0<br>(0–0)              |
| Diet low in fibre                             | 300,994<br>(134,201–470,634)       | 0<br>(0–0)           | 0<br>(0–0)            | 0<br>(0–0)              | 0<br>(0–0)            | 0<br>(0–0)            | 0<br>(0–0)              |
| Diet low in calcium                           | 49,181<br>(34,016–63,592)          | 0<br>(0–0)           | 0<br>(0–0)            | 0<br>(0–0)              | 0<br>(0–0)            | 0<br>(0–0)            | 0<br>(0–0)              |
| Diet low in seafood omega-3 fatty acids       | 596,246<br>(437,287–764,762)       | 0<br>(0–0)           | 0<br>(0–0)            | 0<br>(0–0)              | 0<br>(0–0)            | 0<br>(0–0)            | 0<br>(0–0)              |
| Diet low in polyunsaturated fatty acids       | 227,307<br>(108,675–350,194)       | 0<br>(0–0)           | 0<br>(0–0)            | 0<br>(0–0)              | 0<br>(0–0)            | 0<br>(0–0)            | 0<br>(0–0)              |
| Diet high in trans fatty acids                | 222,173<br>(160,511–283,740)       | 0<br>(0–0)           | 0<br>(0–0)            | 0<br>(0–0)              | 0<br>(0–0)            | 0<br>(0–0)            | 0<br>(0–0)              |
| Diet high in sodium                           | 1,371,438<br>(878,780–1,834,541)   | 0<br>(0–0)           | 0<br>(0–0)            | 0<br>(0–0)              | 0<br>(0–0)            | 0<br>(0–0)            | 0<br>(0–0)              |
| Physical inactivity and low physical activity | 1,636,107<br>(1,369,722–1,899,182) | 0<br>(0–0)           | 0<br>(0–0)            | 0<br>(0–0)              | 0<br>(0–0)            | 0<br>(0–0)            | 0<br>(0–0)              |



**Web table 1: Global deaths attributable to risk factors by age and sex in 2010**

| Risk                                                      | Females,<br>All Ages         | Females,<br>0-6 Days | Females,<br>7-27 Days | Females,<br>28-364 Days | Females,<br>1-4 Years | Females,<br>5-9 Years | Females,<br>10-14 Years |
|-----------------------------------------------------------|------------------------------|----------------------|-----------------------|-------------------------|-----------------------|-----------------------|-------------------------|
| Occupational risk factors                                 | 102,250<br>(68,744–140,097)  | 0<br>(0–0)           | 0<br>(0–0)            | 0<br>(0–0)              | 0<br>(0–0)            | 0<br>(0–0)            | 0<br>(0–0)              |
| Occupational carcinogens                                  | 25,943<br>(15,498–37,074)    | 0<br>(0–0)           | 0<br>(0–0)            | 0<br>(0–0)              | 0<br>(0–0)            | 0<br>(0–0)            | 0<br>(0–0)              |
| Occupational exposure to asbestos                         | 7,047<br>(3,312–9,681)       | 0<br>(0–0)           | 0<br>(0–0)            | 0<br>(0–0)              | 0<br>(0–0)            | 0<br>(0–0)            | 0<br>(0–0)              |
| Occupational exposure to arsenic                          | 747<br>(275–1,402)           | 0<br>(0–0)           | 0<br>(0–0)            | 0<br>(0–0)              | 0<br>(0–0)            | 0<br>(0–0)            | 0<br>(0–0)              |
| Occupational exposure to benzene                          | 1,189<br>(434–2,156)         | 0<br>(0–0)           | 0<br>(0–0)            | 0<br>(0–0)              | 0<br>(0–0)            | 0<br>(0–0)            | 0<br>(0–0)              |
| Occupational exposure to beryllium                        | 49<br>(19–86)                | 0<br>(0–0)           | 0<br>(0–0)            | 0<br>(0–0)              | 0<br>(0–0)            | 0<br>(0–0)            | 0<br>(0–0)              |
| Occupational exposure to cadmium                          | 145<br>(62–245)              | 0<br>(0–0)           | 0<br>(0–0)            | 0<br>(0–0)              | 0<br>(0–0)            | 0<br>(0–0)            | 0<br>(0–0)              |
| Occupational exposure to chromium                         | 570<br>(295–858)             | 0<br>(0–0)           | 0<br>(0–0)            | 0<br>(0–0)              | 0<br>(0–0)            | 0<br>(0–0)            | 0<br>(0–0)              |
| Occupational exposure to diesel engine exhaust            | 3,413<br>(1,709–5,262)       | 0<br>(0–0)           | 0<br>(0–0)            | 0<br>(0–0)              | 0<br>(0–0)            | 0<br>(0–0)            | 0<br>(0–0)              |
| Occupational exposure to second-hand smoke                | 7,046<br>(3,935–9,630)       | 0<br>(0–0)           | 0<br>(0–0)            | 0<br>(0–0)              | 0<br>(0–0)            | 0<br>(0–0)            | 0<br>(0–0)              |
| Occupational exposure to formaldehyde                     | 245<br>(97–456)              | 0<br>(0–0)           | 0<br>(0–0)            | 0<br>(0–0)              | 0<br>(0–0)            | 0<br>(0–0)            | 0<br>(0–0)              |
| Occupational exposure to nickel                           | 2,702<br>(743–5,679)         | 0<br>(0–0)           | 0<br>(0–0)            | 0<br>(0–0)              | 0<br>(0–0)            | 0<br>(0–0)            | 0<br>(0–0)              |
| Occupational exposure to polycyclic aromatic hydrocarbons | 993<br>(441–1,661)           | 0<br>(0–0)           | 0<br>(0–0)            | 0<br>(0–0)              | 0<br>(0–0)            | 0<br>(0–0)            | 0<br>(0–0)              |
| Occupational exposure to silica                           | 2,072<br>(1,102–2,948)       | 0<br>(0–0)           | 0<br>(0–0)            | 0<br>(0–0)              | 0<br>(0–0)            | 0<br>(0–0)            | 0<br>(0–0)              |
| Occupational exposure to sulfuric acid                    | 239<br>(74–509)              | 0<br>(0–0)           | 0<br>(0–0)            | 0<br>(0–0)              | 0<br>(0–0)            | 0<br>(0–0)            | 0<br>(0–0)              |
| Occupational asthmagens                                   | 8,352<br>(4,854–13,425)      | 0<br>(0–0)           | 0<br>(0–0)            | 0<br>(0–0)              | 0<br>(0–0)            | 0<br>(0–0)            | 0<br>(0–0)              |
| Occupational particulate matter, gases, and fumes         | 47,311<br>(20,330–77,499)    | 0<br>(0–0)           | 0<br>(0–0)            | 0<br>(0–0)              | 0<br>(0–0)            | 0<br>(0–0)            | 0<br>(0–0)              |
| Occupational noise                                        | 0<br>(0–0)                   | 0<br>(0–0)           | 0<br>(0–0)            | 0<br>(0–0)              | 0<br>(0–0)            | 0<br>(0–0)            | 0<br>(0–0)              |
| Occupational risk factors for injuries                    | 20,644<br>(15,628–27,414)    | 0<br>(0–0)           | 0<br>(0–0)            | 0<br>(0–0)              | 0<br>(0–0)            | 0<br>(0–0)            | 0<br>(0–0)              |
| Occupational low back pain                                | 0<br>(0–0)                   | 0<br>(0–0)           | 0<br>(0–0)            | 0<br>(0–0)              | 0<br>(0–0)            | 0<br>(0–0)            | 0<br>(0–0)              |
| Sexual abuse and violence                                 | 200,930<br>(113,070–292,802) | 0<br>(0–0)           | 0<br>(0–0)            | 0<br>(0–0)              | 0<br>(0–0)            | 10<br>(4–24)          | 424<br>(150–1,017)      |
| Childhood sexual abuse                                    | 27,009<br>(14,290–43,424)    | 0<br>(0–0)           | 0<br>(0–0)            | 0<br>(0–0)              | 0<br>(0–0)            | 10<br>(4–24)          | 424<br>(150–1,017)      |
| Intimate partner violence                                 | 186,365<br>(92,028–280,059)  | 0<br>(0–0)           | 0<br>(0–0)            | 0<br>(0–0)              | 0<br>(0–0)            | 0<br>(0–0)            | 0<br>(0–0)              |

**Web table 1: Global deaths attributable to risk factors by age and sex in 2010**

| Risk                                         | Females,<br>15-19 Years | Females,<br>20-24 Years   | Females,<br>25-29 Years   | Females,<br>30-34 Years   | Females,<br>35-39 Years   | Females,<br>40-44 Years   | Females,<br>45-49 Years   |
|----------------------------------------------|-------------------------|---------------------------|---------------------------|---------------------------|---------------------------|---------------------------|---------------------------|
| Unimproved water and sanitation              | 3,730<br>(138–7,795)    | 4,764<br>(177–9,577)      | 4,966<br>(205–10,035)     | 4,176<br>(150–8,185)      | 3,810<br>(134–7,652)      | 3,191<br>(120–6,651)      | 3,452<br>(139–7,200)      |
| Unimproved water source                      | 1,260<br>(79–2,770)     | 1,656<br>(99–3,583)       | 1,792<br>(113–3,709)      | 1,512<br>(94–3,191)       | 1,342<br>(81–2,852)       | 1,096<br>(70–2,389)       | 1,097<br>(68–2,353)       |
| Unimproved sanitation                        | 2,711<br>(60–5,803)     | 3,429<br>(75–7,088)       | 3,523<br>(90–7,407)       | 2,956<br>(69–5,976)       | 2,728<br>(64–5,744)       | 2,308<br>(55–5,004)       | 2,570<br>(60–5,514)       |
| Air pollution                                |                         |                           |                           |                           |                           |                           |                           |
| Ambient particulate matter pollution         | 0<br>(0–0)              | 0<br>(0–0)                | 6,324<br>(4,356–8,414)    | 8,792<br>(6,102–11,616)   | 14,632<br>(10,380–19,319) | 26,144<br>(18,745–33,928) | 37,512<br>(26,358–47,833) |
| Household air pollution from solid fuels     | 0<br>(0–0)              | 0<br>(0–0)                | 8,429<br>(5,790–11,082)   | 11,285<br>(8,123–15,093)  | 18,278<br>(12,863–24,314) | 31,146<br>(21,980–41,692) | 44,164<br>(30,827–58,644) |
| Ambient ozone pollution                      | 0<br>(0–0)              | 0<br>(0–0)                | 166<br>(44–370)           | 186<br>(50–438)           | 317<br>(85–652)           | 471<br>(139–958)          | 856<br>(269–1,642)        |
| Other environmental risks                    | 0<br>(0–0)              | 0<br>(0–0)                | 2,930<br>(1,492–4,827)    | 4,140<br>(2,201–6,491)    | 4,214<br>(2,943–7,248)    | 6,851<br>(4,824–11,623)   | 9,285<br>(7,259–11,544)   |
| Residential radon                            | 0<br>(0–0)              | 0<br>(0–0)                | 61<br>(6–174)             | 134<br>(17–371)           | 298<br>(36–756)           | 696<br>(96–1,665)         | 1,222<br>(168–2,836)      |
| Lead exposure                                | 0<br>(0–0)              | 0<br>(0–0)                | 2,868<br>(1,424–4,719)    | 4,006<br>(2,071–6,354)    | 3,915<br>(2,743–6,932)    | 6,156<br>(4,265–10,887)   | 8,063<br>(6,340–9,888)    |
| Child and maternal undernutrition            | 5,927<br>(3,725–8,282)  | 12,729<br>(7,754–17,080)  | 12,278<br>(7,130–16,544)  | 10,697<br>(6,167–14,564)  | 9,491<br>(5,101–13,668)   | 5,921<br>(3,524–8,211)    | 3,490<br>(2,151–4,880)    |
| Suboptimal breastfeeding                     | 0<br>(0–0)              | 0<br>(0–0)                | 0<br>(0–0)                | 0<br>(0–0)                | 0<br>(0–0)                | 0<br>(0–0)                | 0<br>(0–0)                |
| Non-exclusive breastfeeding                  | 0<br>(0–0)              | 0<br>(0–0)                | 0<br>(0–0)                | 0<br>(0–0)                | 0<br>(0–0)                | 0<br>(0–0)                | 0<br>(0–0)                |
| Discontinued breastfeeding                   | 0<br>(0–0)              | 0<br>(0–0)                | 0<br>(0–0)                | 0<br>(0–0)                | 0<br>(0–0)                | 0<br>(0–0)                | 0<br>(0–0)                |
| Childhood underweight                        | 0<br>(0–0)              | 0<br>(0–0)                | 0<br>(0–0)                | 0<br>(0–0)                | 0<br>(0–0)                | 0<br>(0–0)                | 0<br>(0–0)                |
| Iron deficiency                              | 5,927<br>(3,725–8,282)  | 12,729<br>(7,754–17,080)  | 12,278<br>(7,130–16,544)  | 10,697<br>(6,167–14,564)  | 9,491<br>(5,101–13,668)   | 5,921<br>(3,524–8,211)    | 3,490<br>(2,151–4,880)    |
| Vitamin A deficiency                         | 0<br>(0–0)              | 0<br>(0–0)                | 0<br>(0–0)                | 0<br>(0–0)                | 0<br>(0–0)                | 0<br>(0–0)                | 0<br>(0–0)                |
| Zinc deficiency                              | 0<br>(0–0)              | 0<br>(0–0)                | 0<br>(0–0)                | 0<br>(0–0)                | 0<br>(0–0)                | 0<br>(0–0)                | 0<br>(0–0)                |
| Tobacco smoking, including second-hand smoke | 0<br>(0–0)              | 0<br>(0–0)                | 1,355<br>(884–1,858)      | 7,377<br>(5,626–15,036)   | 14,471<br>(10,884–21,074) | 30,471<br>(21,481–41,286) | 49,005<br>(35,549–61,966) |
| Tobacco smoking                              | 0<br>(0–0)              | 0<br>(0–0)                | 0<br>(0–0)                | 5,489<br>(3,820–13,386)   | 11,433<br>(7,715–17,768)  | 25,718<br>(16,435–36,620) | 41,062<br>(27,671–54,764) |
| Second-hand smoke                            | 0<br>(0–0)              | 0<br>(0–0)                | 1,355<br>(884–1,858)      | 1,888<br>(1,283–2,526)    | 3,038<br>(1,994–4,104)    | 4,753<br>(2,953–6,798)    | 7,943<br>(5,174–10,820)   |
| Alcohol and drug use                         | 9,013<br>(7,293–11,336) | 14,618<br>(11,943–18,335) | 16,606<br>(13,798–19,691) | 17,874<br>(15,051–20,885) | 26,052<br>(21,828–36,126) | 32,533<br>(27,632–41,440) | 43,078<br>(37,362–52,258) |
| Alcohol use                                  | 7,229<br>(5,791–9,270)  | 10,832<br>(8,844–13,512)  | 12,229<br>(9,940–14,529)  | 13,351<br>(11,138–15,636) | 21,296<br>(17,527–31,436) | 27,714<br>(23,210–36,423) | 38,478<br>(33,186–46,744) |
| Drug use                                     | 1,806<br>(1,066–2,978)  | 3,839<br>(2,360–6,094)    | 4,446<br>(3,124–6,192)    | 4,600<br>(3,332–6,351)    | 4,886<br>(3,707–6,437)    | 5,034<br>(3,627–6,687)    | 4,966<br>(3,545–6,791)    |

**Web table 1: Global deaths attributable to risk factors by age and sex in 2010**

| Risk                                          | Females,<br>15-19 Years | Females,<br>20-24 Years | Females,<br>25-29 Years  | Females,<br>30-34 Years   | Females,<br>35-39 Years   | Females,<br>40-44 Years   | Females,<br>45-49 Years     |
|-----------------------------------------------|-------------------------|-------------------------|--------------------------|---------------------------|---------------------------|---------------------------|-----------------------------|
| Physiological risk factors                    |                         |                         |                          |                           |                           |                           |                             |
| High fasting plasma glucose                   | 0<br>(0-0)              | 0<br>(0-0)              | 6,474<br>(5,252-8,018)   | 7,540<br>(6,034-9,463)    | 15,063<br>(12,076-18,478) | 22,627<br>(18,065-27,542) | 45,982<br>(37,851-54,539)   |
| High total cholesterol                        | 0<br>(0-0)              | 0<br>(0-0)              | 1,869<br>(1,126-2,789)   | 2,642<br>(1,590-3,949)    | 6,159<br>(4,110-8,662)    | 10,551<br>(6,909-14,868)  | 21,800<br>(15,766-27,966)   |
| High blood pressure                           | 0<br>(0-0)              | 0<br>(0-0)              | 8,420<br>(5,963-11,255)  | 10,469<br>(7,344-13,908)  | 26,327<br>(20,454-32,350) | 41,185<br>(32,158-51,135) | 89,641<br>(75,829-103,530)  |
| High body-mass index                          | 0<br>(0-0)              | 0<br>(0-0)              | 7,758<br>(6,055-9,706)   | 9,870<br>(7,656-12,434)   | 21,200<br>(16,370-26,279) | 29,849<br>(24,150-36,073) | 55,220<br>(45,531-66,227)   |
| Low bone mineral density                      | 0<br>(0-0)              | 0<br>(0-0)              | 0<br>(0-0)               | 0<br>(0-0)                | 0<br>(0-0)                | 0<br>(0-0)                | 0<br>(0-0)                  |
| Dietary risk factors and physical inactivity  |                         |                         |                          |                           |                           |                           |                             |
| Diet low in fruits                            | 0<br>(0-0)              | 0<br>(0-0)              | 9,682<br>(16,924-22,989) | 13,664<br>(25,312-33,051) | 23,253<br>(43,098-56,194) | 41,898<br>(76,040-98,060) | 64,713<br>(121,804-152,783) |
| Diet low in vegetables                        | 0<br>(0-0)              | 0<br>(0-0)              | 4,792<br>(2,916-6,661)   | 6,417<br>(3,964-8,879)    | 10,060<br>(5,953-14,020)  | 16,619<br>(10,122-23,200) | 24,692<br>(14,432-34,010)   |
| Diet low in whole grains                      | 0<br>(0-0)              | 0<br>(0-0)              | 4,139<br>(3,026-5,421)   | 5,608<br>(4,149-7,305)    | 8,789<br>(6,413-11,209)   | 15,240<br>(11,287-19,153) | 22,445<br>(17,072-27,543)   |
| Diet low in nuts and seeds                    | 0<br>(0-0)              | 0<br>(0-0)              | 4,464<br>(2,868-6,084)   | 6,386<br>(4,056-8,811)    | 9,753<br>(6,220-13,251)   | 16,959<br>(10,328-23,188) | 24,519<br>(15,310-32,092)   |
| Diet low in milk                              | 0<br>(0-0)              | 0<br>(0-0)              | 271<br>(72-493)          | 403<br>(114-702)          | 694<br>(180-1,221)        | 1,178<br>(341-2,067)      | 1,840<br>(503-3,171)        |
| Diet high in red meat                         | 0<br>(0-0)              | 0<br>(0-0)              | 61<br>(16-110)           | 103<br>(27-189)           | 197<br>(50-373)           | 348<br>(93-623)           | 578<br>(147-1,004)          |
| Diet high in processed meat                   | 0<br>(0-0)              | 0<br>(0-0)              | 1,750<br>(412-3,512)     | 2,493<br>(602-4,896)      | 3,675<br>(899-7,009)      | 6,458<br>(1,538-12,319)   | 9,525<br>(2,322-17,462)     |
| Diet high in sugar-sweetened beverages        | 0<br>(0-0)              | 0<br>(0-0)              | 991<br>(461-1,497)       | 1,253<br>(537-1,872)      | 1,541<br>(637-3,139)      | 2,159<br>(800-4,780)      | 2,627<br>(1,054-5,635)      |
| Diet low in fibre                             | 0<br>(0-0)              | 0<br>(0-0)              | 1,701<br>(785-2,704)     | 2,365<br>(1,089-3,661)    | 3,758<br>(1,741-5,866)    | 6,258<br>(2,847-9,811)    | 8,984<br>(4,086-14,025)     |
| Diet low in calcium                           | 0<br>(0-0)              | 0<br>(0-0)              | 333<br>(206-477)         | 486<br>(319-678)          | 828<br>(545-1,193)        | 1,378<br>(963-1,934)      | 2,088<br>(1,449-2,854)      |
| Diet low in seafood omega-3 fatty acids       | 0<br>(0-0)              | 0<br>(0-0)              | 2,997<br>(2,076-4,114)   | 4,261<br>(2,913-5,886)    | 6,414<br>(4,504-8,753)    | 11,036<br>(7,431-15,296)  | 15,690<br>(10,737-20,786)   |
| Diet low in polyunsaturated fatty acids       | 0<br>(0-0)              | 0<br>(0-0)              | 1,261<br>(622-1,957)     | 1,758<br>(822-2,746)      | 2,615<br>(1,239-4,140)    | 4,327<br>(2,046-6,804)    | 6,093<br>(2,901-9,422)      |
| Diet high in trans fatty acids                | 0<br>(0-0)              | 0<br>(0-0)              | 1,485<br>(1,019-2,075)   | 2,079<br>(1,387-2,832)    | 3,035<br>(2,057-4,136)    | 5,026<br>(3,366-6,826)    | 7,029<br>(4,945-9,257)      |
| Diet high in sodium                           | 0<br>(0-0)              | 0<br>(0-0)              | 4,564<br>(2,421-6,438)   | 6,799<br>(4,359-8,966)    | 11,087<br>(6,854-16,159)  | 20,689<br>(12,985-28,816) | 30,798<br>(20,167-40,915)   |
| Physical inactivity and low physical activity | 0<br>(0-0)              | 0<br>(0-0)              | 6,934<br>(5,613-8,381)   | 10,326<br>(8,474-12,526)  | 17,117<br>(13,979-20,744) | 28,749<br>(23,345-34,600) | 44,269<br>(36,957-51,317)   |
| Occupational risk factors                     | 1,767<br>(1,393-2,224)  | 2,889<br>(2,281-3,687)  | 3,576<br>(2,786-4,484)   | 3,568<br>(2,812-4,489)    | 4,241<br>(3,236-5,542)    | 4,962<br>(3,697-6,500)    | 6,308<br>(4,559-8,520)      |
| Occupational carcinogens                      | 75<br>(41-122)          | 148<br>(72-248)         | 185<br>(102-300)         | 247<br>(138-391)          | 349<br>(201-534)          | 686<br>(392-1,035)        | 1,228<br>(689-1,910)        |

**Web table 1: Global deaths attributable to risk factors by age and sex in 2010**

| Risk                                                      | Females,<br>15-19 Years  | Females,<br>20-24 Years   | Females,<br>25-29 Years   | Females,<br>30-34 Years   | Females,<br>35-39 Years  | Females,<br>40-44 Years  | Females,<br>45-49 Years  |
|-----------------------------------------------------------|--------------------------|---------------------------|---------------------------|---------------------------|--------------------------|--------------------------|--------------------------|
| Occupational exposure to asbestos                         | 24<br>(10-38)            | 27<br>(10-43)             | 31<br>(11-48)             | 42<br>(17-65)             | 70<br>(29-109)           | 130<br>(57-202)          | 242<br>(107-357)         |
| Occupational exposure to arsenic                          | 0<br>(0-0)               | 0<br>(0-0)                | 1<br>(0-3)                | 3<br>(1-8)                | 9<br>(3-18)              | 20<br>(7-40)             | 40<br>(14-83)            |
| Occupational exposure to benzene                          | 43<br>(16-85)            | 102<br>(35-196)           | 101<br>(38-193)           | 104<br>(39-192)           | 56<br>(21-107)           | 66<br>(24-126)           | 34<br>(13-65)            |
| Occupational exposure to beryllium                        | 0<br>(0-0)               | 0<br>(0-0)                | 0<br>(0-0)                | 0<br>(0-0)                | 1<br>(0-1)               | 1<br>(0-2)               | 3<br>(1-5)               |
| Occupational exposure to cadmium                          | 0<br>(0-0)               | 0<br>(0-0)                | 0<br>(0-1)                | 1<br>(0-1)                | 2<br>(1-3)               | 4<br>(2-7)               | 8<br>(3-14)              |
| Occupational exposure to chromium                         | 0<br>(0-0)               | 0<br>(0-0)                | 1<br>(0-2)                | 2<br>(1-5)                | 7<br>(3-12)              | 15<br>(7-25)             | 31<br>(14-51)            |
| Occupational exposure to diesel engine exhaust            | 0<br>(0-0)               | 0<br>(0-0)                | 7<br>(3-14)               | 15<br>(6-29)              | 40<br>(18-70)            | 91<br>(42-150)           | 185<br>(84-306)          |
| Occupational exposure to second-hand smoke                | 0<br>(0-0)               | 0<br>(0-0)                | 14<br>(6-27)              | 32<br>(14-55)             | 83<br>(41-134)           | 189<br>(93-281)          | 380<br>(191-574)         |
| Occupational exposure to formaldehyde                     | 7<br>(3-14)              | 19<br>(7-39)              | 19<br>(7-37)              | 23<br>(9-46)              | 14<br>(5-28)             | 18<br>(7-40)             | 10<br>(4-23)             |
| Occupational exposure to nickel                           | 0<br>(0-0)               | 0<br>(0-0)                | 5<br>(1-13)               | 12<br>(3-31)              | 32<br>(8-71)             | 73<br>(19-158)           | 145<br>(36-330)          |
| Occupational exposure to polycyclic aromatic hydrocarbons | 0<br>(0-0)               | 0<br>(0-0)                | 2<br>(1-4)                | 4<br>(2-9)                | 12<br>(5-22)             | 26<br>(11-47)            | 53<br>(22-95)            |
| Occupational exposure to silica                           | 0<br>(0-0)               | 0<br>(0-0)                | 4<br>(2-8)                | 9<br>(4-17)               | 24<br>(11-41)            | 56<br>(27-86)            | 112<br>(53-176)          |
| Occupational exposure to sulfuric acid                    | 0<br>(0-0)               | 0<br>(0-0)                | 1<br>(0-3)                | 1<br>(0-5)                | 3<br>(1-10)              | 6<br>(2-19)              | 14<br>(4-40)             |
| Occupational asthmagens                                   | 89<br>(44-173)           | 184<br>(99-322)           | 242<br>(131-465)          | 274<br>(159-500)          | 431<br>(236-815)         | 544<br>(309-960)         | 751<br>(441-1,292)       |
| Occupational particulate matter, gases, and fumes         | 0<br>(0-0)               | 0<br>(0-0)                | 390<br>(152-743)          | 465<br>(181-894)          | 868<br>(365-1,565)       | 1,341<br>(584-2,260)     | 2,291<br>(980-3,839)     |
| Occupational noise                                        | 0<br>(0-0)               | 0<br>(0-0)                | 0<br>(0-0)                | 0<br>(0-0)                | 0<br>(0-0)               | 0<br>(0-0)               | 0<br>(0-0)               |
| Occupational risk factors for injuries                    | 1,603<br>(1,240-2,060)   | 2,557<br>(1,958-3,357)    | 2,759<br>(2,076-3,625)    | 2,581<br>(1,959-3,426)    | 2,593<br>(1,839-3,657)   | 2,392<br>(1,727-3,275)   | 2,038<br>(1,464-2,863)   |
| Occupational low back pain                                | 0<br>(0-0)               | 0<br>(0-0)                | 0<br>(0-0)                | 0<br>(0-0)                | 0<br>(0-0)               | 0<br>(0-0)               | 0<br>(0-0)               |
| Sexual abuse and violence                                 | 20,401<br>(9,975-37,077) | 25,013<br>(14,521-39,410) | 21,106<br>(12,143-31,964) | 17,197<br>(10,674-25,864) | 16,965<br>(9,636-26,190) | 15,812<br>(8,342-25,389) | 13,549<br>(7,115-21,718) |
| Childhood sexual abuse                                    | 3,877<br>(1,610-7,358)   | 3,220<br>(1,357-6,413)    | 2,419<br>(968-4,772)      | 1,875<br>(858-3,441)      | 1,957<br>(962-3,610)     | 2,065<br>(986-3,606)     | 1,886<br>(981-3,290)     |
| Intimate partner violence                                 | 18,330<br>(7,592-34,410) | 23,487<br>(12,704-37,565) | 19,975<br>(10,948-30,924) | 16,304<br>(9,629-25,166)  | 15,987<br>(8,588-25,315) | 14,732<br>(7,145-24,077) | 12,498<br>(5,857-20,668) |

**Web table 1: Global deaths attributable to risk factors by age and sex in 2010**

| Risk                                         | Females,<br>50-54 Years   | Females,<br>55-59 Years     | Females,<br>60-64 Years      | Females,<br>65-69 Years      | Females,<br>70-74 Years      | Females,<br>75-79 Years      | Females,<br>80+ Years        |
|----------------------------------------------|---------------------------|-----------------------------|------------------------------|------------------------------|------------------------------|------------------------------|------------------------------|
| Unimproved water and sanitation              | 3,507<br>(135-7,131)      | 4,584<br>(178-9,782)        | 6,789<br>(261-15,046)        | 8,060<br>(289-17,911)        | 9,743<br>(341-21,616)        | 8,486<br>(293-18,744)        | 13,580<br>(495-30,827)       |
| Unimproved water source                      | 1,131<br>(76-2,350)       | 1,359<br>(86-3,112)         | 1,943<br>(121-4,244)         | 2,324<br>(144-5,158)         | 2,647<br>(165-6,051)         | 2,352<br>(151-5,513)         | 3,688<br>(249-8,731)         |
| Unimproved sanitation                        | 2,598<br>(59-5,440)       | 3,495<br>(91-7,591)         | 5,238<br>(134-12,007)        | 6,201<br>(145-14,500)        | 7,623<br>(177-18,175)        | 6,594<br>(157-15,364)        | 10,569<br>(259-24,379)       |
| Air pollution                                |                           |                             |                              |                              |                              |                              |                              |
| Ambient particulate matter pollution         | 57,425<br>(41,754-72,933) | 85,035<br>(60,200-107,199)  | 108,320<br>(77,266-135,979)  | 130,618<br>(92,940-167,006)  | 181,045<br>(126,943-231,999) | 200,044<br>(140,821-250,730) | 460,488<br>(337,477-580,439) |
| Household air pollution from solid fuels     | 67,773<br>(48,078-89,514) | 101,884<br>(70,341-134,028) | 133,479<br>(94,887-172,988)  | 169,246<br>(117,129-224,928) | 218,848<br>(156,124-294,731) | 222,800<br>(156,816-302,382) | 391,989<br>(266,670-542,900) |
| Ambient ozone pollution                      | 1,581<br>(492-2,931)      | 3,268<br>(1,045-6,038)      | 5,162<br>(1,693-9,362)       | 7,522<br>(2,289-13,380)      | 10,485<br>(3,594-18,874)     | 11,283<br>(3,637-19,672)     | 24,803<br>(8,093-43,780)     |
| Other environmental risks                    | 14,664<br>(11,312-18,541) | 21,671<br>(16,734-27,078)   | 28,251<br>(22,004-35,034)    | 35,771<br>(27,987-44,090)    | 48,358<br>(38,326-58,297)    | 53,364<br>(43,479-64,131)    | 117,253<br>(97,713-138,456)  |
| Residential radon                            | 1,998<br>(267-4,503)      | 2,965<br>(446-6,775)        | 3,494<br>(477-8,851)         | 3,849<br>(553-8,534)         | 4,362<br>(630-9,719)         | 4,104<br>(597-9,477)         | 5,796<br>(841-12,628)        |
| Lead exposure                                | 12,667<br>(10,084-15,740) | 18,705<br>(14,803-22,995)   | 24,757<br>(19,567-30,656)    | 31,922<br>(25,388-38,746)    | 43,996<br>(35,574-53,522)    | 49,261<br>(40,632-59,366)    | 111,457<br>(93,568-131,295)  |
| Child and maternal undernutrition            | 970<br>(593-1,347)        | 1,262<br>(784-1,786)        | 1,515<br>(884-2,190)         | 1,945<br>(1,187-2,673)       | 2,412<br>(1,448-3,434)       | 2,625<br>(1,603-3,584)       | 9,287<br>(5,060-11,505)      |
| Suboptimal breastfeeding                     | 0<br>(0-0)                | 0<br>(0-0)                  | 0<br>(0-0)                   | 0<br>(0-0)                   | 0<br>(0-0)                   | 0<br>(0-0)                   | 0<br>(0-0)                   |
| Non-exclusive breastfeeding                  | 0<br>(0-0)                | 0<br>(0-0)                  | 0<br>(0-0)                   | 0<br>(0-0)                   | 0<br>(0-0)                   | 0<br>(0-0)                   | 0<br>(0-0)                   |
| Discontinued breastfeeding                   | 0<br>(0-0)                | 0<br>(0-0)                  | 0<br>(0-0)                   | 0<br>(0-0)                   | 0<br>(0-0)                   | 0<br>(0-0)                   | 0<br>(0-0)                   |
| Childhood underweight                        | 0<br>(0-0)                | 0<br>(0-0)                  | 0<br>(0-0)                   | 0<br>(0-0)                   | 0<br>(0-0)                   | 0<br>(0-0)                   | 0<br>(0-0)                   |
| Iron deficiency                              | 970<br>(593-1,347)        | 1,262<br>(784-1,786)        | 1,515<br>(884-2,190)         | 1,945<br>(1,187-2,673)       | 2,412<br>(1,448-3,434)       | 2,625<br>(1,603-3,584)       | 9,287<br>(5,060-11,505)      |
| Vitamin A deficiency                         | 0<br>(0-0)                | 0<br>(0-0)                  | 0<br>(0-0)                   | 0<br>(0-0)                   | 0<br>(0-0)                   | 0<br>(0-0)                   | 0<br>(0-0)                   |
| Zinc deficiency                              | 0<br>(0-0)                | 0<br>(0-0)                  | 0<br>(0-0)                   | 0<br>(0-0)                   | 0<br>(0-0)                   | 0<br>(0-0)                   | 0<br>(0-0)                   |
| Tobacco smoking, including second-hand smoke | 81,527<br>(58,407-99,252) | 125,867<br>(86,791-152,681) | 160,422<br>(109,569-196,491) | 190,869<br>(130,302-232,985) | 246,208<br>(165,198-300,762) | 248,759<br>(172,774-305,633) | 578,398<br>(400,221-706,393) |
| Tobacco smoking                              | 69,604<br>(45,707-88,034) | 108,520<br>(68,746-135,985) | 138,436<br>(87,904-175,041)  | 163,985<br>(102,955-206,504) | 205,895<br>(120,895-262,006) | 203,049<br>(124,842-259,895) | 470,733<br>(286,180-604,292) |
| Second-hand smoke                            | 11,923<br>(7,841-15,937)  | 17,347<br>(11,807-22,925)   | 21,986<br>(14,792-29,227)    | 26,885<br>(18,196-35,586)    | 40,313<br>(27,273-52,548)    | 45,709<br>(30,274-60,823)    | 107,665<br>(71,506-142,506)  |
| Alcohol and drug use                         | 56,230<br>(48,581-66,205) | 72,893<br>(62,769-83,962)   | 78,814<br>(66,619-91,495)    | 64,867<br>(53,048-77,372)    | 105,276<br>(84,138-126,162)  | 114,379<br>(88,673-139,377)  | 298,094<br>(214,905-375,700) |
| Alcohol use                                  | 52,432<br>(45,230-61,650) | 69,889<br>(59,867-81,308)   | 76,430<br>(64,371-89,160)    | 63,998<br>(52,250-76,490)    | 104,189<br>(83,167-125,192)  | 113,500<br>(87,443-138,629)  | 295,980<br>(212,915-372,663) |

**Web table 1: Global deaths attributable to risk factors by age and sex in 2010**

| Risk                                          | Females,<br>50-54 Years      | Females,<br>55-59 Years      | Females,<br>60-64 Years      | Females,<br>65-69 Years      | Females,<br>70-74 Years      | Females,<br>75-79 Years      | Females,<br>80+ Years              |
|-----------------------------------------------|------------------------------|------------------------------|------------------------------|------------------------------|------------------------------|------------------------------|------------------------------------|
| Drug use                                      | 4,344<br>(3,035–5,958)       | 3,711<br>(2,744–5,110)       | 3,156<br>(2,349–4,258)       | 869<br>(494–1,551)           | 1,088<br>(651–2,189)         | 879<br>(515–1,938)           | 2,114<br>(1,128–4,656)             |
| Physiological risk factors                    |                              |                              |                              |                              |                              |                              |                                    |
| High fasting plasma glucose                   | 67,635<br>(56,488–79,349)    | 114,914<br>(96,324–133,740)  | 145,569<br>(123,753–169,138) | 186,130<br>(158,353–213,675) | 243,384<br>(203,465–282,235) | 247,973<br>(208,862–286,273) | 503,923<br>(414,700–592,123)       |
| High total cholesterol                        | 33,880<br>(24,693–44,096)    | 56,716<br>(41,619–73,392)    | 75,072<br>(55,033–96,397)    | 96,268<br>(71,356–122,348)   | 149,481<br>(105,469–195,643) | 163,406<br>(111,285–222,797) | 439,351<br>(327,337–564,641)       |
| High blood pressure                           | 131,356<br>(112,301–151,628) | 228,153<br>(199,085–259,018) | 290,500<br>(252,602–328,236) | 416,112<br>(369,785–465,935) | 614,059<br>(549,023–679,958) | 756,965<br>(679,733–836,440) | 2,032,092<br>(1,841,487–2,237,161) |
| High body-mass index                          | 79,502<br>(65,950–93,692)    | 116,690<br>(97,825–137,894)  | 148,901<br>(124,337–175,485) | 164,720<br>(136,650–194,766) | 232,758<br>(194,325–272,889) | 247,305<br>(204,651–291,020) | 624,692<br>(512,182–745,578)       |
| Low bone mineral density                      | 2,930<br>(1,831–4,304)       | 3,650<br>(2,306–5,343)       | 4,607<br>(2,674–6,397)       | 6,095<br>(3,579–8,755)       | 7,959<br>(4,983–11,332)      | 12,969<br>(7,974–17,760)     | 45,936<br>(30,059–58,224)          |
| Dietary risk factors and physical inactivity  | 211,496<br>(188,805–234,418) | 310,010<br>(274,986–341,814) | 398,089<br>(355,004–437,250) | 508,067<br>(456,433–562,338) | 746,163<br>(672,252–811,703) | 873,989<br>(795,286–957,571) | 2,346,662<br>(2,138,741–2,542,228) |
| Diet low in fruits                            | 98,218<br>(76,969–117,972)   | 140,395<br>(107,273–169,846) | 169,186<br>(129,005–206,243) | 209,417<br>(157,619–257,561) | 287,863<br>(218,620–353,425) | 319,327<br>(241,294–390,398) | 687,145<br>(516,079–850,939)       |
| Diet low in vegetables                        | 35,865<br>(21,886–49,915)    | 48,153<br>(30,025–66,665)    | 57,952<br>(36,345–79,166)    | 71,827<br>(46,431–98,661)    | 105,024<br>(68,610–143,438)  | 116,535<br>(77,801–158,683)  | 281,817<br>(184,421–380,003)       |
| Diet low in whole grains                      | 33,151<br>(25,423–40,772)    | 47,277<br>(35,871–58,352)    | 58,632<br>(44,657–72,263)    | 70,786<br>(53,531–87,165)    | 104,364<br>(80,633–127,346)  | 117,011<br>(90,363–143,152)  | 274,729<br>(212,007–334,088)       |
| Diet low in nuts and seeds                    | 38,222<br>(23,792–51,472)    | 56,541<br>(35,874–75,981)    | 74,114<br>(45,840–99,840)    | 93,075<br>(57,749–124,755)   | 140,671<br>(85,820–188,734)  | 159,567<br>(96,493–215,975)  | 458,118<br>(269,369–620,556)       |
| Diet low in milk                              | 2,796<br>(760–4,923)         | 3,848<br>(1,103–6,633)       | 4,434<br>(1,188–7,741)       | 4,848<br>(1,402–8,470)       | 6,300<br>(1,756–10,817)      | 6,558<br>(1,848–11,366)      | 13,687<br>(3,669–23,775)           |
| Diet high in red meat                         | 888<br>(238–1,565)           | 1,268<br>(339–2,255)         | 1,483<br>(398–2,671)         | 1,651<br>(440–2,831)         | 2,267<br>(595–4,040)         | 2,443<br>(635–4,277)         | 5,476<br>(1,425–9,607)             |
| Diet high in processed meat                   | 14,536<br>(3,468–25,331)     | 20,494<br>(4,728–36,834)     | 25,699<br>(5,770–46,990)     | 30,583<br>(6,567–56,707)     | 45,998<br>(9,807–82,741)     | 51,185<br>(11,258–89,165)    | 154,901<br>(32,715–276,901)        |
| Diet high in sugar-sweetened beverages        | 3,578<br>(1,353–7,805)       | 6,019<br>(1,808–10,791)      | 6,999<br>(2,095–12,347)      | 10,194<br>(3,054–15,757)     | 11,998<br>(3,770–19,219)     | 12,611<br>(7,883–26,552)     | 32,935<br>(14,319–63,180)          |
| Diet low in fibre                             | 12,914<br>(5,988–20,052)     | 17,843<br>(8,341–27,800)     | 21,262<br>(9,765–33,121)     | 24,825<br>(11,129–38,536)    | 37,514<br>(16,120–58,667)    | 43,364<br>(19,051–69,598)    | 120,206<br>(52,024–192,523)        |
| Diet low in calcium                           | 3,144<br>(2,134–4,235)       | 4,317<br>(2,973–5,781)       | 4,887<br>(3,434–6,694)       | 5,288<br>(3,602–6,914)       | 6,729<br>(4,473–8,893)       | 6,874<br>(4,620–9,215)       | 12,829<br>(8,397–17,105)           |
| Diet low in seafood omega-3 fatty acids       | 23,992<br>(17,166–31,617)    | 34,709<br>(24,646–45,449)    | 44,236<br>(30,742–58,023)    | 54,071<br>(39,071–71,287)    | 79,760<br>(56,517–104,548)   | 87,068<br>(62,937–112,822)   | 232,013<br>(168,478–302,019)       |
| Diet low in polyunsaturated fatty acids       | 9,261<br>(4,273–14,462)      | 13,078<br>(6,216–20,307)     | 16,664<br>(7,846–26,199)     | 20,371<br>(9,797–32,203)     | 29,278<br>(14,190–45,277)    | 32,228<br>(15,524–50,067)    | 90,373<br>(43,377–139,868)         |
| Diet high in trans fatty acids                | 10,272<br>(7,303–13,460)     | 13,656<br>(9,501–17,727)     | 17,505<br>(12,420–23,186)    | 20,503<br>(14,659–27,234)    | 27,785<br>(20,107–35,930)    | 30,009<br>(21,757–38,665)    | 83,790<br>(59,976–110,691)         |
| Diet high in sodium                           | 49,604<br>(31,904–66,372)    | 75,728<br>(48,395–100,466)   | 101,361<br>(65,825–136,225)  | 133,809<br>(85,558–178,162)  | 191,317<br>(121,105–256,653) | 215,957<br>(136,932–290,228) | 529,725<br>(332,411–719,833)       |
| Physical inactivity and low physical activity | 65,404<br>(55,356–75,708)    | 94,421<br>(80,058–109,717)   | 120,292<br>(100,608–139,132) | 147,817<br>(125,030–171,098) | 214,011<br>(177,465–253,529) | 242,807<br>(198,639–284,507) | 643,960<br>(514,862–771,157)       |

**Web table 1: Global deaths attributable to risk factors by age and sex in 2010**

| Risk                                                      | Females,<br>50-54 Years  | Females,<br>55-59 Years  | Females,<br>60-64 Years  | Females,<br>65-69 Years  | Females,<br>70-74 Years  | Females,<br>75-79 Years  | Females,<br>80+ Years    |
|-----------------------------------------------------------|--------------------------|--------------------------|--------------------------|--------------------------|--------------------------|--------------------------|--------------------------|
| Occupational risk factors                                 | 8,294<br>(5,663–11,378)  | 12,286<br>(7,700–17,535) | 14,373<br>(8,340–21,119) | 10,305<br>(5,946–15,561) | 13,007<br>(7,324–19,977) | 12,027<br>(6,608–18,556) | 4,648<br>(2,596–6,548)   |
| Occupational carcinogens                                  | 1,869<br>(1,098–2,777)   | 3,398<br>(1,977–5,209)   | 3,837<br>(2,182–5,776)   | 3,136<br>(1,835–4,579)   | 3,682<br>(2,010–5,389)   | 2,455<br>(1,391–3,465)   | 4,648<br>(2,596–6,548)   |
| Occupational exposure to asbestos                         | 379<br>(167–558)         | 527<br>(232–760)         | 674<br>(306–940)         | 739<br>(342–1,028)       | 927<br>(402–1,300)       | 986<br>(447–1,398)       | 2,249<br>(1,075–3,110)   |
| Occupational exposure to arsenic                          | 62<br>(23–121)           | 122<br>(44–238)          | 132<br>(48–261)          | 97<br>(37–185)           | 112<br>(37–219)          | 55<br>(19–107)           | 93<br>(29–185)           |
| Occupational exposure to benzene                          | 37<br>(13–70)            | 61<br>(23–116)           | 66<br>(24–123)           | 98<br>(34–175)           | 112<br>(39–205)          | 149<br>(53–276)          | 159<br>(54–296)          |
| Occupational exposure to beryllium                        | 4<br>(2–7)               | 8<br>(3–14)              | 9<br>(3–16)              | 6<br>(2–12)              | 7<br>(2–14)              | 4<br>(1–7)               | 6<br>(2–12)              |
| Occupational exposure to cadmium                          | 12<br>(5–21)             | 23<br>(10–42)            | 26<br>(11–45)            | 19<br>(8–33)             | 22<br>(8–38)             | 11<br>(4–19)             | 19<br>(6–33)             |
| Occupational exposure to chromium                         | 46<br>(23–74)            | 92<br>(47–150)           | 100<br>(49–160)          | 74<br>(36–116)           | 86<br>(40–139)           | 42<br>(17–67)            | 73<br>(28–120)           |
| Occupational exposure to diesel engine exhaust            | 285<br>(144–450)         | 555<br>(283–903)         | 613<br>(298–984)         | 444<br>(223–702)         | 508<br>(232–817)         | 245<br>(105–392)         | 425<br>(167–691)         |
| Occupational exposure to second-hand smoke                | 585<br>(314–852)         | 1,134<br>(651–1,636)     | 1,259<br>(692–1,867)     | 921<br>(494–1,312)       | 1,047<br>(538–1,506)     | 511<br>(235–727)         | 892<br>(384–1,322)       |
| Occupational exposure to formaldehyde                     | 10<br>(4–21)             | 16<br>(6–34)             | 16<br>(6–31)             | 22<br>(8–46)             | 22<br>(8–43)             | 27<br>(10–53)            | 20<br>(8–39)             |
| Occupational exposure to nickel                           | 220<br>(58–466)          | 434<br>(114–954)         | 472<br>(124–1,049)       | 351<br>(95–748)          | 411<br>(104–892)         | 203<br>(51–447)          | 346<br>(80–755)          |
| Occupational exposure to polycyclic aromatic hydrocarbons | 81<br>(36–140)           | 160<br>(69–281)          | 175<br>(76–304)          | 129<br>(57–222)          | 150<br>(58–262)          | 73<br>(29–128)           | 127<br>(46–224)          |
| Occupational exposure to silica                           | 171<br>(86–253)          | 337<br>(184–515)         | 367<br>(186–550)         | 269<br>(138–403)         | 312<br>(153–468)         | 152<br>(65–230)          | 260<br>(105–404)         |
| Occupational exposure to sulfuric acid                    | 21<br>(6–53)             | 36<br>(11–79)            | 46<br>(14–113)           | 29<br>(9–68)             | 37<br>(11–88)            | 16<br>(5–39)             | 27<br>(9–59)             |
| Occupational asthmagens                                   | 880<br>(503–1,486)       | 1,111<br>(629–1,945)     | 1,148<br>(650–1,946)     | 838<br>(466–1,362)       | 938<br>(494–1,555)       | 924<br>(505–1,495)       | 0<br>(0–0)               |
| Occupational particulate matter, gases, and fumes         | 3,878<br>(1,727–6,377)   | 6,586<br>(2,939–11,014)  | 8,666<br>(3,681–14,646)  | 6,065<br>(2,423–10,515)  | 8,180<br>(3,298–14,055)  | 8,582<br>(3,597–14,666)  | 0<br>(0–0)               |
| Occupational noise                                        | 0<br>(0–0)               |
| Occupational risk factors for injuries                    | 1,667<br>(1,202–2,342)   | 1,191<br>(839–1,673)     | 722<br>(514–1,037)       | 266<br>(194–364)         | 208<br>(156–285)         | 67<br>(50–90)            | 0<br>(0–0)               |
| Occupational low back pain                                | 0<br>(0–0)               |
| Sexual abuse and violence                                 | 13,028<br>(6,132–21,732) | 11,793<br>(5,363–19,619) | 10,396<br>(4,468–17,432) | 8,976<br>(3,748–15,822)  | 9,034<br>(3,903–15,053)  | 7,074<br>(3,007–11,629)  | 10,150<br>(4,114–18,123) |
| Childhood sexual abuse                                    | 1,982<br>(1,000–3,338)   | 1,796<br>(926–3,097)     | 1,534<br>(763–2,601)     | 1,234<br>(617–2,165)     | 1,114<br>(564–1,940)     | 752<br>(391–1,211)       | 864<br>(463–1,456)       |
| Intimate partner violence                                 | 11,896<br>(4,891–20,523) | 10,741<br>(3,973–18,753) | 9,510<br>(3,537–16,855)  | 8,269<br>(2,925–14,994)  | 8,395<br>(3,058–14,562)  | 6,628<br>(2,454–11,276)  | 9,613<br>(3,366–17,719)  |

0 indicates zero deaths attributable; blank cells indicate that attributable deaths were not quantified

**Web table 2: Global deaths attributable to risk factors by age and sex in 1990**

| Risk                                         | Both Sexes,<br>All Ages            | Both Sexes,<br>0-6 Days     | Both Sexes,<br>7-27 Days     | Both Sexes,<br>28-364 Days         | Both Sexes,<br>1-4 Years           | Both Sexes,<br>5-9 Years | Both Sexes,<br>10-14 Years |
|----------------------------------------------|------------------------------------|-----------------------------|------------------------------|------------------------------------|------------------------------------|--------------------------|----------------------------|
| Unimproved water and sanitation              | 715,873<br>(36,817–1,279,220)      | 17,771<br>(826–33,218)      | 42,728<br>(2,121–78,066)     | 219,855<br>(11,268–399,959)        | 194,805<br>(10,602–346,367)        | 29,200<br>(1,267–54,277) | 13,106<br>(532–25,603)     |
| Unimproved water source                      | 288,007<br>(20,641–553,293)        | 7,022<br>(489–13,858)       | 16,946<br>(1,203–33,450)     | 89,307<br>(6,410–174,117)          | 81,593<br>(6,018–156,438)          | 11,269<br>(755–22,425)   | 5,156<br>(317–10,611)      |
| Unimproved sanitation                        | 496,986<br>(15,380–927,845)        | 12,455<br>(352–24,427)      | 29,840<br>(935–56,760)       | 151,513<br>(4,667–286,363)         | 133,071<br>(4,327–244,813)         | 20,640<br>(556–39,887)   | 9,173<br>(223–18,288)      |
| Air pollution                                |                                    |                             |                              |                                    |                                    |                          |                            |
| Ambient particulate matter pollution         | 2,910,161<br>(2,546,184–3,286,508) | 33,776<br>(22,354–46,596)   | 35,358<br>(24,180–47,687)    | 143,102<br>(98,396–187,600)        | 96,652<br>(66,168–129,364)         | 0<br>(0–0)               | 0<br>(0–0)                 |
| Household air pollution from solid fuels     | 4,473,490<br>(3,651,253–5,206,632) | 117,132<br>(82,781–149,934) | 124,367<br>(89,432–156,785)  | 498,302<br>(362,730–617,439)       | 354,274<br>(261,142–450,145)       | 0<br>(0–0)               | 0<br>(0–0)                 |
| Ambient ozone pollution                      | 143,362<br>(47,539–251,885)        | 0<br>(0–0)                  | 0<br>(0–0)                   | 0<br>(0–0)                         | 0<br>(0–0)                         | 0<br>(0–0)               | 0<br>(0–0)                 |
| Other environmental risks                    | 209,923<br>(177,673–243,565)       | 0<br>(0–0)                  | 0<br>(0–0)                   | 0<br>(0–0)                         | 0<br>(0–0)                         | 0<br>(0–0)               | 0<br>(0–0)                 |
| Residential radon                            |                                    |                             |                              |                                    |                                    |                          |                            |
| Lead exposure                                | 209,923<br>(177,673–243,565)       | 0<br>(0–0)                  | 0<br>(0–0)                   | 0<br>(0–0)                         | 0<br>(0–0)                         | 0<br>(0–0)               | 0<br>(0–0)                 |
| Child and maternal undernutrition            | 3,473,589<br>(2,906,896–4,175,138) | 0<br>(0–0)                  | 246,308<br>(157,743–329,587) | 1,659,270<br>(1,384,576–1,950,609) | 1,425,820<br>(1,144,769–1,821,093) | 2,473<br>(1,980–3,165)   | 1,938<br>(1,585–2,447)     |
| Suboptimal breastfeeding                     | 1,275,024<br>(802,142–1,772,745)   | 0<br>(0–0)                  | 246,308<br>(157,743–329,587) | 940,270<br>(575,278–1,339,060)     | 88,447<br>(9,386–189,574)          | 0<br>(0–0)               | 0<br>(0–0)                 |
| Non-exclusive breastfeeding                  | 1,117,908<br>(663,274–1,576,633)   | 0<br>(0–0)                  | 246,308<br>(157,743–329,587) | 871,600<br>(507,872–1,252,531)     | 0<br>(0–0)                         | 0<br>(0–0)               | 0<br>(0–0)                 |
| Discontinued breastfeeding                   | 157,117<br>(16,188–341,702)        | 0<br>(0–0)                  | 0<br>(0–0)                   | 68,670<br>(6,776–155,318)          | 88,447<br>(9,386–189,574)          | 0<br>(0–0)               | 0<br>(0–0)                 |
| Childhood underweight                        | 2,263,952<br>(1,927,356–2,735,821) | 0<br>(0–0)                  | 0<br>(0–0)                   | 1,119,425<br>(961,173–1,312,738)   | 1,144,527<br>(948,571–1,435,911)   | 0<br>(0–0)               | 0<br>(0–0)                 |
| Iron deficiency                              | 168,084<br>(130,444–197,085)       | 0<br>(0–0)                  | 0<br>(0–0)                   | 9,145<br>(7,484–11,400)            | 16,748<br>(12,913–21,800)          | 2,473<br>(1,980–3,165)   | 1,938<br>(1,585–2,447)     |
| Vitamin A deficiency                         | 349,354<br>(170,504–632,149)       | 0<br>(0–0)                  | 0<br>(0–0)                   | 88,182<br>(40,749–151,034)         | 261,172<br>(126,837–493,664)       | 0<br>(0–0)               | 0<br>(0–0)                 |
| Zinc deficiency                              | 275,590<br>(51,274–529,451)        | 0<br>(0–0)                  | 0<br>(0–0)                   | 0<br>(0–0)                         | 275,590<br>(51,274–529,451)        | 0<br>(0–0)               | 0<br>(0–0)                 |
| Tobacco smoking, including second-hand smoke | 5,329,808<br>(4,778,526–6,049,296) | 36,885<br>(24,959–49,513)   | 39,798<br>(27,347–52,915)    | 168,688<br>(118,669–217,894)       | 107,912<br>(75,419–141,843)        | 0<br>(0–0)               | 0<br>(0–0)                 |
| Tobacco smoking                              | 4,576,298<br>(4,068,753–5,312,438) | 0<br>(0–0)                  | 0<br>(0–0)                   | 0<br>(0–0)                         | 0<br>(0–0)                         | 0<br>(0–0)               | 0<br>(0–0)                 |
| Second-hand smoke                            | 753,510<br>(585,131–912,313)       | 36,885<br>(24,959–49,513)   | 39,798<br>(27,347–52,915)    | 168,688<br>(118,669–217,894)       | 107,912<br>(75,419–141,843)        | 0<br>(0–0)               | 0<br>(0–0)                 |
| Alcohol and drug use                         | 2,047,814<br>(1,831,313–2,270,020) | 411<br>(265–667)            | 341<br>(184–568)             | 1,640<br>(1,049–2,827)             | 6,162<br>(3,654–9,600)             | 3,226<br>(2,456–4,181)   | 2,633<br>(2,110–3,298)     |
| Alcohol use                                  | 1,988,502<br>(1,772,115–2,214,916) | 225<br>(152–344)            | 121<br>(68–222)              | 910<br>(585–1,293)                 | 4,423<br>(2,624–6,735)             | 2,789<br>(2,171–3,418)   | 2,252<br>(1,824–2,705)     |



**Web table 2: Global deaths attributable to risk factors by age and sex in 1990**

| Risk                                          | Both Sexes,<br>All Ages            | Both Sexes,<br>0-6 Days | Both Sexes,<br>7-27 Days | Both Sexes,<br>28-364 Days | Both Sexes,<br>1-4 Years | Both Sexes,<br>5-9 Years | Both Sexes,<br>10-14 Years |
|-----------------------------------------------|------------------------------------|-------------------------|--------------------------|----------------------------|--------------------------|--------------------------|----------------------------|
| Drug use                                      | 68,577<br>(50,706–102,395)         | 186<br>(73–434)         | 220<br>(84–424)          | 730<br>(336–1,738)         | 1,739<br>(588–3,615)     | 437<br>(196–935)         | 381<br>(205–826)           |
| Physiological risk factors                    |                                    |                         |                          |                            |                          |                          |                            |
| High fasting plasma glucose                   | 2,104,174<br>(1,797,633–2,401,170) | 0<br>(0–0)              | 0<br>(0–0)               | 0<br>(0–0)                 | 0<br>(0–0)               | 0<br>(0–0)               | 0<br>(0–0)                 |
| High total cholesterol                        | 1,945,920<br>(1,625,929–2,318,054) | 0<br>(0–0)              | 0<br>(0–0)               | 0<br>(0–0)                 | 0<br>(0–0)               | 0<br>(0–0)               | 0<br>(0–0)                 |
| High blood pressure                           | 7,293,185<br>(6,701,203–7,859,894) | 0<br>(0–0)              | 0<br>(0–0)               | 0<br>(0–0)                 | 0<br>(0–0)               | 0<br>(0–0)               | 0<br>(0–0)                 |
| High body-mass index                          | 1,963,549<br>(1,590,282–2,345,133) | 0<br>(0–0)              | 0<br>(0–0)               | 0<br>(0–0)                 | 0<br>(0–0)               | 0<br>(0–0)               | 0<br>(0–0)                 |
| Low bone mineral density                      | 103,270<br>(90,672–124,230)        | 0<br>(0–0)              | 0<br>(0–0)               | 0<br>(0–0)                 | 0<br>(0–0)               | 0<br>(0–0)               | 0<br>(0–0)                 |
| Dietary risk factors and physical inactivity  | 8,370,343<br>(7,738,620–9,000,836) | 0<br>(0–0)              | 0<br>(0–0)               | 0<br>(0–0)                 | 0<br>(0–0)               | 0<br>(0–0)               | 0<br>(0–0)                 |
| Diet low in fruits                            | 3,667,202<br>(2,870,267–4,394,152) | 0<br>(0–0)              | 0<br>(0–0)               | 0<br>(0–0)                 | 0<br>(0–0)               | 0<br>(0–0)               | 0<br>(0–0)                 |
| Diet low in vegetables                        | 1,454,057<br>(978,665–1,924,334)   | 0<br>(0–0)              | 0<br>(0–0)               | 0<br>(0–0)                 | 0<br>(0–0)               | 0<br>(0–0)               | 0<br>(0–0)                 |
| Diet low in whole grains                      | 1,230,276<br>(958,136–1,489,812)   | 0<br>(0–0)              | 0<br>(0–0)               | 0<br>(0–0)                 | 0<br>(0–0)               | 0<br>(0–0)               | 0<br>(0–0)                 |
| Diet low in nuts and seeds                    | 1,914,209<br>(1,216,363–2,487,874) | 0<br>(0–0)              | 0<br>(0–0)               | 0<br>(0–0)                 | 0<br>(0–0)               | 0<br>(0–0)               | 0<br>(0–0)                 |
| Diet low in milk                              | 68,150<br>(20,479–114,435)         | 0<br>(0–0)              | 0<br>(0–0)               | 0<br>(0–0)                 | 0<br>(0–0)               | 0<br>(0–0)               | 0<br>(0–0)                 |
| Diet high in red meat                         | 26,439<br>(7,374–45,232)           | 0<br>(0–0)              | 0<br>(0–0)               | 0<br>(0–0)                 | 0<br>(0–0)               | 0<br>(0–0)               | 0<br>(0–0)                 |
| Diet high in processed meat                   | 731,675<br>(158,044–1,257,423)     | 0<br>(0–0)              | 0<br>(0–0)               | 0<br>(0–0)                 | 0<br>(0–0)               | 0<br>(0–0)               | 0<br>(0–0)                 |
| Diet high in sugar-sweetened beverages        | 141,316<br>(89,249–191,574)        | 0<br>(0–0)              | 0<br>(0–0)               | 0<br>(0–0)                 | 0<br>(0–0)               | 0<br>(0–0)               | 0<br>(0–0)                 |
| Diet low in fibre                             | 584,144<br>(260,065–914,729)       | 0<br>(0–0)              | 0<br>(0–0)               | 0<br>(0–0)                 | 0<br>(0–0)               | 0<br>(0–0)               | 0<br>(0–0)                 |
| Diet low in calcium                           | 82,305<br>(57,324–108,535)         | 0<br>(0–0)              | 0<br>(0–0)               | 0<br>(0–0)                 | 0<br>(0–0)               | 0<br>(0–0)               | 0<br>(0–0)                 |
| Diet low in seafood omega-3 fatty acids       | 1,043,085<br>(757,418–1,327,627)   | 0<br>(0–0)              | 0<br>(0–0)               | 0<br>(0–0)                 | 0<br>(0–0)               | 0<br>(0–0)               | 0<br>(0–0)                 |
| Diet low in polyunsaturated fatty acids       | 448,065<br>(213,262–687,396)       | 0<br>(0–0)              | 0<br>(0–0)               | 0<br>(0–0)                 | 0<br>(0–0)               | 0<br>(0–0)               | 0<br>(0–0)                 |
| Diet high in trans fatty acids                | 367,461<br>(265,936–467,609)       | 0<br>(0–0)              | 0<br>(0–0)               | 0<br>(0–0)                 | 0<br>(0–0)               | 0<br>(0–0)               | 0<br>(0–0)                 |
| Diet high in sodium                           | 2,245,355<br>(1,459,900–2,966,107) | 0<br>(0–0)              | 0<br>(0–0)               | 0<br>(0–0)                 | 0<br>(0–0)               | 0<br>(0–0)               | 0<br>(0–0)                 |
| Physical inactivity and low physical activity |                                    |                         |                          |                            |                          |                          |                            |

**Web table 2: Global deaths attributable to risk factors by age and sex in 1990**

| Risk                                                      | Both Sexes,<br>All Ages        | Both Sexes,<br>0-6 Days | Both Sexes,<br>7-27 Days | Both Sexes,<br>28-364 Days | Both Sexes,<br>1-4 Years | Both Sexes,<br>5-9 Years | Both Sexes,<br>10-14 Years |
|-----------------------------------------------------------|--------------------------------|-------------------------|--------------------------|----------------------------|--------------------------|--------------------------|----------------------------|
| Occupational risk factors                                 | 811,146<br>(623,674–1,010,107) | 0<br>(0–0)              | 0<br>(0–0)               | 0<br>(0–0)                 | 0<br>(0–0)               | 0<br>(0–0)               | 0<br>(0–0)                 |
| Occupational carcinogens                                  | 72,073<br>(50,753–101,233)     | 0<br>(0–0)              | 0<br>(0–0)               | 0<br>(0–0)                 | 0<br>(0–0)               | 0<br>(0–0)               | 0<br>(0–0)                 |
| Occupational exposure to asbestos                         | 23,057<br>(16,939–33,009)      | 0<br>(0–0)              | 0<br>(0–0)               | 0<br>(0–0)                 | 0<br>(0–0)               | 0<br>(0–0)               | 0<br>(0–0)                 |
| Occupational exposure to arsenic                          | 1,618<br>(622–3,039)           | 0<br>(0–0)              | 0<br>(0–0)               | 0<br>(0–0)                 | 0<br>(0–0)               | 0<br>(0–0)               | 0<br>(0–0)                 |
| Occupational exposure to benzene                          | 1,764<br>(741–3,085)           | 0<br>(0–0)              | 0<br>(0–0)               | 0<br>(0–0)                 | 0<br>(0–0)               | 0<br>(0–0)               | 0<br>(0–0)                 |
| Occupational exposure to beryllium                        | 87<br>(35–152)                 | 0<br>(0–0)              | 0<br>(0–0)               | 0<br>(0–0)                 | 0<br>(0–0)               | 0<br>(0–0)               | 0<br>(0–0)                 |
| Occupational exposure to cadmium                          | 288<br>(131–494)               | 0<br>(0–0)              | 0<br>(0–0)               | 0<br>(0–0)                 | 0<br>(0–0)               | 0<br>(0–0)               | 0<br>(0–0)                 |
| Occupational exposure to chromium                         | 1,022<br>(618–1,578)           | 0<br>(0–0)              | 0<br>(0–0)               | 0<br>(0–0)                 | 0<br>(0–0)               | 0<br>(0–0)               | 0<br>(0–0)                 |
| Occupational exposure to diesel engine exhaust            | 13,040<br>(7,494–20,486)       | 0<br>(0–0)              | 0<br>(0–0)               | 0<br>(0–0)                 | 0<br>(0–0)               | 0<br>(0–0)               | 0<br>(0–0)                 |
| Occupational exposure to second-hand smoke                | 14,025<br>(10,058–19,715)      | 0<br>(0–0)              | 0<br>(0–0)               | 0<br>(0–0)                 | 0<br>(0–0)               | 0<br>(0–0)               | 0<br>(0–0)                 |
| Occupational exposure to formaldehyde                     | 478<br>(202–877)               | 0<br>(0–0)              | 0<br>(0–0)               | 0<br>(0–0)                 | 0<br>(0–0)               | 0<br>(0–0)               | 0<br>(0–0)                 |
| Occupational exposure to nickel                           | 5,004<br>(1,331–10,489)        | 0<br>(0–0)              | 0<br>(0–0)               | 0<br>(0–0)                 | 0<br>(0–0)               | 0<br>(0–0)               | 0<br>(0–0)                 |
| Occupational exposure to polycyclic aromatic hydrocarbons | 2,130<br>(1,018–3,613)         | 0<br>(0–0)              | 0<br>(0–0)               | 0<br>(0–0)                 | 0<br>(0–0)               | 0<br>(0–0)               | 0<br>(0–0)                 |
| Occupational exposure to silica                           | 9,056<br>(6,140–13,213)        | 0<br>(0–0)              | 0<br>(0–0)               | 0<br>(0–0)                 | 0<br>(0–0)               | 0<br>(0–0)               | 0<br>(0–0)                 |
| Occupational exposure to sulfuric acid                    | 2,157<br>(626–4,707)           | 0<br>(0–0)              | 0<br>(0–0)               | 0<br>(0–0)                 | 0<br>(0–0)               | 0<br>(0–0)               | 0<br>(0–0)                 |
| Occupational asthmagens                                   | 42,151<br>(24,425–76,872)      | 0<br>(0–0)              | 0<br>(0–0)               | 0<br>(0–0)                 | 0<br>(0–0)               | 0<br>(0–0)               | 0<br>(0–0)                 |
| Occupational particulate matter, gases, and fumes         | 275,647<br>(121,774–429,427)   | 0<br>(0–0)              | 0<br>(0–0)               | 0<br>(0–0)                 | 0<br>(0–0)               | 0<br>(0–0)               | 0<br>(0–0)                 |
| Occupational noise                                        | 0<br>(0–0)                     | 0<br>(0–0)              | 0<br>(0–0)               | 0<br>(0–0)                 | 0<br>(0–0)               | 0<br>(0–0)               | 0<br>(0–0)                 |
| Occupational risk factors for injuries                    | 421,275<br>(329,209–529,004)   | 0<br>(0–0)              | 0<br>(0–0)               | 0<br>(0–0)                 | 0<br>(0–0)               | 0<br>(0–0)               | 0<br>(0–0)                 |
| Occupational low back pain                                | 0<br>(0–0)                     | 0<br>(0–0)              | 0<br>(0–0)               | 0<br>(0–0)                 | 0<br>(0–0)               | 0<br>(0–0)               | 0<br>(0–0)                 |
| Sexual abuse and violence                                 |                                |                         |                          |                            |                          |                          |                            |
| Childhood sexual abuse                                    |                                |                         |                          |                            |                          |                          |                            |
| Intimate partner violence                                 |                                |                         |                          |                            |                          |                          |                            |

**Web table 2: Global deaths attributable to risk factors by age and sex in 1990**

| Risk                                         | Both Sexes,<br>15-19 Years | Both Sexes,<br>20-24 Years | Both Sexes,<br>25-29 Years | Both Sexes,<br>30-34 Years | Both Sexes,<br>35-39 Years   | Both Sexes,<br>40-44 Years   | Both Sexes,<br>45-49 Years   |
|----------------------------------------------|----------------------------|----------------------------|----------------------------|----------------------------|------------------------------|------------------------------|------------------------------|
| Unimproved water and sanitation              | 12,049<br>(509–23,339)     | 12,853<br>(542–24,456)     | 12,264<br>(571–22,729)     | 11,674<br>(558–21,649)     | 11,779<br>(586–21,456)       | 10,046<br>(513–18,727)       | 10,688<br>(519–19,733)       |
| Unimproved water source                      | 4,692<br>(291–9,705)       | 4,994<br>(325–10,180)      | 4,866<br>(333–9,712)       | 4,630<br>(314–9,339)       | 4,656<br>(348–9,216)         | 3,981<br>(280–7,901)         | 4,159<br>(292–8,295)         |
| Unimproved sanitation                        | 8,480<br>(229–17,060)      | 9,066<br>(233–17,768)      | 8,581<br>(249–16,473)      | 8,170<br>(237–15,677)      | 8,261<br>(236–15,510)        | 7,039<br>(225–13,576)        | 7,546<br>(223–14,364)        |
| Air pollution                                |                            |                            |                            |                            |                              |                              |                              |
| Ambient particulate matter pollution         | 0<br>(0–0)                 | 0<br>(0–0)                 | 19,248<br>(13,867–24,255)  | 28,721<br>(20,924–36,166)  | 43,844<br>(33,276–54,539)    | 64,245<br>(47,989–80,521)    | 87,913<br>(64,269–109,905)   |
| Household air pollution from solid fuels     | 0<br>(0–0)                 | 0<br>(0–0)                 | 26,694<br>(20,382–33,100)  | 38,487<br>(29,073–48,311)  | 57,908<br>(44,018–72,330)    | 82,424<br>(61,883–102,954)   | 115,005<br>(88,202–143,054)  |
| Ambient ozone pollution                      | 0<br>(0–0)                 | 0<br>(0–0)                 | 421<br>(131–787)           | 537<br>(170–974)           | 1,015<br>(335–1,809)         | 1,426<br>(463–2,578)         | 2,458<br>(770–4,394)         |
| Other environmental risks                    | 0<br>(0–0)                 | 0<br>(0–0)                 | 3,972<br>(2,302–5,983)     | 5,517<br>(3,427–8,050)     | 5,149<br>(4,172–6,423)       | 7,487<br>(6,118–9,126)       | 9,796<br>(8,188–11,561)      |
| Residential radon                            |                            |                            |                            |                            |                              |                              |                              |
| Lead exposure                                | 0<br>(0–0)                 | 0<br>(0–0)                 | 3,972<br>(2,302–5,983)     | 5,517<br>(3,427–8,050)     | 5,149<br>(4,172–6,423)       | 7,487<br>(6,118–9,126)       | 9,796<br>(8,188–11,561)      |
| Child and maternal undernutrition            | 11,849<br>(7,588–16,505)   | 20,318<br>(13,233–26,859)  | 19,509<br>(12,128–25,790)  | 18,061<br>(11,216–24,436)  | 17,815<br>(11,054–24,324)    | 10,757<br>(6,831–14,642)     | 6,571<br>(4,352–8,788)       |
| Suboptimal breastfeeding                     | 0<br>(0–0)                 | 0<br>(0–0)                 | 0<br>(0–0)                 | 0<br>(0–0)                 | 0<br>(0–0)                   | 0<br>(0–0)                   | 0<br>(0–0)                   |
| Non-exclusive breastfeeding                  | 0<br>(0–0)                 | 0<br>(0–0)                 | 0<br>(0–0)                 | 0<br>(0–0)                 | 0<br>(0–0)                   | 0<br>(0–0)                   | 0<br>(0–0)                   |
| Discontinued breastfeeding                   | 0<br>(0–0)                 | 0<br>(0–0)                 | 0<br>(0–0)                 | 0<br>(0–0)                 | 0<br>(0–0)                   | 0<br>(0–0)                   | 0<br>(0–0)                   |
| Childhood underweight                        | 0<br>(0–0)                 | 0<br>(0–0)                 | 0<br>(0–0)                 | 0<br>(0–0)                 | 0<br>(0–0)                   | 0<br>(0–0)                   | 0<br>(0–0)                   |
| Iron deficiency                              | 11,849<br>(7,588–16,505)   | 20,318<br>(13,233–26,859)  | 19,509<br>(12,128–25,790)  | 18,061<br>(11,216–24,436)  | 17,815<br>(11,054–24,324)    | 10,757<br>(6,831–14,642)     | 6,571<br>(4,352–8,788)       |
| Vitamin A deficiency                         | 0<br>(0–0)                 | 0<br>(0–0)                 | 0<br>(0–0)                 | 0<br>(0–0)                 | 0<br>(0–0)                   | 0<br>(0–0)                   | 0<br>(0–0)                   |
| Zinc deficiency                              | 0<br>(0–0)                 | 0<br>(0–0)                 | 0<br>(0–0)                 | 0<br>(0–0)                 | 0<br>(0–0)                   | 0<br>(0–0)                   | 0<br>(0–0)                   |
| Tobacco smoking, including second-hand smoke | 0<br>(0–0)                 | 0<br>(0–0)                 | 2,924<br>(1,962–3,854)     | 47,099<br>(38,064–59,477)  | 83,033<br>(60,024–108,116)   | 146,825<br>(119,044–176,845) | 202,975<br>(176,778–237,267) |
| Tobacco smoking                              | 0<br>(0–0)                 | 0<br>(0–0)                 | 0<br>(0–0)                 | 42,982<br>(33,786–55,663)  | 78,401<br>(54,782–103,406)   | 140,411<br>(112,140–170,963) | 193,041<br>(165,969–225,985) |
| Second-hand smoke                            | 0<br>(0–0)                 | 0<br>(0–0)                 | 2,924<br>(1,962–3,854)     | 4,118<br>(2,819–5,366)     | 4,632<br>(3,039–6,391)       | 6,414<br>(4,157–8,995)       | 9,934<br>(6,400–13,535)      |
| Alcohol and drug use                         | 43,734<br>(37,474–51,304)  | 67,569<br>(57,944–79,274)  | 74,767<br>(65,263–88,401)  | 82,817<br>(72,743–94,537)  | 124,139<br>(109,423–142,782) | 128,044<br>(114,364–144,912) | 137,152<br>(122,555–153,181) |
| Alcohol use                                  | 40,912<br>(34,655–48,360)  | 60,761<br>(51,405–71,830)  | 66,440<br>(57,044–77,853)  | 74,981<br>(65,368–85,671)  | 117,504<br>(102,739–135,492) | 122,930<br>(109,586–139,269) | 133,052<br>(118,860–148,711) |

| Web table 2: Global deaths attributable to risk factors by age and sex in 1990 |                            |                            |                            |                            |                              |                              |                              |
|--------------------------------------------------------------------------------|----------------------------|----------------------------|----------------------------|----------------------------|------------------------------|------------------------------|------------------------------|
| Risk                                                                           | Both Sexes,<br>15-19 Years | Both Sexes,<br>20-24 Years | Both Sexes,<br>25-29 Years | Both Sexes,<br>30-34 Years | Both Sexes,<br>35-39 Years   | Both Sexes,<br>40-44 Years   | Both Sexes,<br>45-49 Years   |
| Drug use                                                                       | 2,980<br>(1,724–4,919)     | 7,401<br>(4,341–11,654)    | 9,039<br>(5,961–14,290)    | 8,462<br>(5,654–14,179)    | 7,417<br>(5,104–12,287)      | 5,878<br>(4,248–9,712)       | 4,980<br>(3,655–7,264)       |
| Physiological risk factors                                                     |                            |                            |                            |                            |                              |                              |                              |
| High fasting plasma glucose                                                    | 0<br>(0–0)                 | 0<br>(0–0)                 | 12,474<br>(10,243–15,085)  | 16,202<br>(13,171–19,598)  | 32,242<br>(26,696–37,982)    | 41,304<br>(33,866–48,909)    | 76,716<br>(64,040–88,921)    |
| High total cholesterol                                                         | 0<br>(0–0)                 | 0<br>(0–0)                 | 7,015<br>(5,121–9,233)     | 11,790<br>(8,837–15,346)   | 25,905<br>(20,860–31,611)    | 39,632<br>(32,345–48,427)    | 61,348<br>(50,544–74,047)    |
| High blood pressure                                                            | 0<br>(0–0)                 | 0<br>(0–0)                 | 26,556<br>(20,100–32,972)  | 37,260<br>(28,704–45,454)  | 74,381<br>(61,731–86,930)    | 104,020<br>(86,394–121,427)  | 187,185<br>(164,173–210,163) |
| High body-mass index                                                           | 0<br>(0–0)                 | 0<br>(0–0)                 | 11,291<br>(7,949–14,989)   | 15,906<br>(11,238–20,914)  | 32,172<br>(24,554–40,009)    | 45,344<br>(35,014–56,164)    | 66,675<br>(52,589–80,933)    |
| Low bone mineral density                                                       | 0<br>(0–0)                 | 0<br>(0–0)                 | 0<br>(0–0)                 | 0<br>(0–0)                 | 0<br>(0–0)                   | 0<br>(0–0)                   | 0<br>(0–0)                   |
| Dietary risk factors and physical inactivity                                   | 0<br>(0–0)                 | 0<br>(0–0)                 | 47,958<br>(42,731–52,467)  | 74,895<br>(67,596–81,402)  | 118,032<br>(107,448–129,933) | 180,347<br>(164,726–197,526) | 260,888<br>(237,430–286,597) |
| Diet low in fruits                                                             | 0<br>(0–0)                 | 0<br>(0–0)                 | 27,922<br>(22,143–33,244)  | 42,072<br>(32,651–49,983)  | 65,455<br>(51,572–78,612)    | 99,470<br>(78,231–118,570)   | 144,225<br>(111,967–173,900) |
| Diet low in vegetables                                                         | 0<br>(0–0)                 | 0<br>(0–0)                 | 13,864<br>(8,623–18,634)   | 19,998<br>(12,949–26,624)  | 28,863<br>(18,257–38,669)    | 41,407<br>(26,189–55,675)    | 56,830<br>(35,511–76,759)    |
| Diet low in whole grains                                                       | 0<br>(0–0)                 | 0<br>(0–0)                 | 11,671<br>(9,147–14,050)   | 17,325<br>(13,628–20,938)  | 25,570<br>(19,921–30,885)    | 36,865<br>(28,472–44,575)    | 49,133<br>(37,927–59,441)    |
| Diet low in nuts and seeds                                                     | 0<br>(0–0)                 | 0<br>(0–0)                 | 14,195<br>(9,781–17,553)   | 22,435<br>(15,226–28,131)  | 33,282<br>(22,569–41,811)    | 49,005<br>(32,797–62,158)    | 65,318<br>(43,617–83,187)    |
| Diet low in milk                                                               | 0<br>(0–0)                 | 0<br>(0–0)                 | 632<br>(175–1,070)         | 1,024<br>(307–1,760)       | 1,515<br>(454–2,540)         | 1,981<br>(609–3,314)         | 2,787<br>(832–4,746)         |
| Diet high in red meat                                                          | 0<br>(0–0)                 | 0<br>(0–0)                 | 161<br>(45–276)            | 291<br>(76–509)            | 460<br>(128–788)             | 637<br>(180–1,098)           | 913<br>(251–1,561)           |
| Diet high in processed meat                                                    | 0<br>(0–0)                 | 0<br>(0–0)                 | 4,895<br>(1,042–8,646)     | 8,452<br>(1,805–14,893)    | 13,027<br>(2,844–22,398)     | 20,174<br>(4,329–34,856)     | 26,660<br>(5,778–45,562)     |
| Diet high in sugar-sweetened beverages                                         | 0<br>(0–0)                 | 0<br>(0–0)                 | 2,344<br>(1,556–3,288)     | 3,029<br>(2,150–4,032)     | 4,103<br>(1,574–6,293)       | 5,350<br>(1,910–8,129)       | 6,634<br>(2,458–9,859)       |
| Diet low in fibre                                                              | 0<br>(0–0)                 | 0<br>(0–0)                 | 6,334<br>(2,980–9,581)     | 9,632<br>(4,450–14,503)    | 14,207<br>(6,574–21,686)     | 19,389<br>(8,896–29,560)     | 24,641<br>(11,049–38,403)    |
| Diet low in calcium                                                            | 0<br>(0–0)                 | 0<br>(0–0)                 | 807<br>(523–1,062)         | 1,295<br>(829–1,678)       | 1,886<br>(1,311–2,428)       | 2,381<br>(1,705–3,016)       | 3,270<br>(2,355–4,137)       |
| Diet low in seafood omega-3 fatty acids                                        | 0<br>(0–0)                 | 0<br>(0–0)                 | 9,323<br>(6,822–11,653)    | 14,588<br>(10,716–18,256)  | 21,265<br>(15,534–26,526)    | 30,958<br>(22,607–39,492)    | 40,539<br>(29,269–51,286)    |
| Diet low in polyunsaturated fatty acids                                        | 0<br>(0–0)                 | 0<br>(0–0)                 | 4,095<br>(2,041–6,169)     | 6,251<br>(3,074–9,468)     | 9,147<br>(4,407–13,910)      | 13,117<br>(6,166–19,846)     | 17,158<br>(8,156–26,139)     |
| Diet high in trans fatty acids                                                 | 0<br>(0–0)                 | 0<br>(0–0)                 | 3,080<br>(2,214–3,956)     | 4,812<br>(3,444–6,156)     | 7,174<br>(5,155–9,211)       | 10,857<br>(7,963–13,792)     | 14,611<br>(10,495–18,739)    |
| Diet high in sodium                                                            | 0<br>(0–0)                 | 0<br>(0–0)                 | 10,201<br>(5,377–14,725)   | 17,387<br>(11,071–23,626)  | 29,109<br>(18,400–40,045)    | 46,627<br>(30,680–62,461)    | 68,062<br>(45,902–89,338)    |
| Physical inactivity and low physical activity                                  |                            |                            |                            |                            |                              |                              |                              |
| Occupational risk factors                                                      | 42,995<br>(32,917–55,295)  | 63,808<br>(48,451–80,324)  | 65,261<br>(50,880–82,991)  | 60,275<br>(47,577–75,300)  | 58,784<br>(46,306–73,545)    | 50,665<br>(40,523–63,536)    | 51,506<br>(41,045–63,924)    |

**Web table 2: Global deaths attributable to risk factors by age and sex in 1990**

| Risk                                                      | Both Sexes,<br>15-19 Years | Both Sexes,<br>20-24 Years | Both Sexes,<br>25-29 Years | Both Sexes,<br>30-34 Years | Both Sexes,<br>35-39 Years | Both Sexes,<br>40-44 Years | Both Sexes,<br>45-49 Years |
|-----------------------------------------------------------|----------------------------|----------------------------|----------------------------|----------------------------|----------------------------|----------------------------|----------------------------|
| Occupational carcinogens                                  | 210<br>(145-299)           | 309<br>(202-453)           | 411<br>(271-594)           | 539<br>(367-770)           | 1,002<br>(677-1,427)       | 1,670<br>(1,118-2,340)     | 3,337<br>(2,259-4,817)     |
| Occupational exposure to asbestos                         | 96<br>(66-142)             | 103<br>(70-151)            | 105<br>(72-153)            | 143<br>(97-203)            | 234<br>(163-320)           | 428<br>(300-615)           | 733<br>(516-1,023)         |
| Occupational exposure to arsenic                          | 0<br>(0-0)                 | 0<br>(0-0)                 | 4<br>(1-7)                 | 7<br>(3-14)                | 24<br>(9-44)               | 39<br>(15-73)              | 89<br>(34-168)             |
| Occupational exposure to benzene                          | 95<br>(39-170)             | 168<br>(69-294)            | 168<br>(71-299)            | 164<br>(66-291)            | 95<br>(40-173)             | 92<br>(38-163)             | 51<br>(21-91)              |
| Occupational exposure to beryllium                        | 0<br>(0-0)                 | 0<br>(0-0)                 | 0<br>(0-0)                 | 0<br>(0-1)                 | 1<br>(0-2)                 | 2<br>(1-4)                 | 5<br>(2-8)                 |
| Occupational exposure to cadmium                          | 0<br>(0-0)                 | 0<br>(0-0)                 | 1<br>(0-1)                 | 1<br>(1-2)                 | 4<br>(2-7)                 | 7<br>(3-11)                | 15<br>(7-26)               |
| Occupational exposure to chromium                         | 0<br>(0-0)                 | 0<br>(0-0)                 | 2<br>(1-3)                 | 4<br>(2-7)                 | 14<br>(9-22)               | 24<br>(14-37)              | 55<br>(34-84)              |
| Occupational exposure to diesel engine exhaust            | 0<br>(0-0)                 | 0<br>(0-0)                 | 27<br>(14-42)              | 51<br>(28-81)              | 173<br>(97-263)            | 299<br>(168-456)           | 694<br>(401-1,078)         |
| Occupational exposure to second-hand smoke                | 0<br>(0-0)                 | 0<br>(0-0)                 | 30<br>(19-43)              | 59<br>(40-84)              | 197<br>(133-281)           | 337<br>(227-468)           | 766<br>(533-1,083)         |
| Occupational exposure to formaldehyde                     | 20<br>(9-34)               | 39<br>(18-66)              | 41<br>(18-69)              | 44<br>(19-79)              | 33<br>(13-63)              | 36<br>(13-74)              | 24<br>(8-53)               |
| Occupational exposure to nickel                           | 0<br>(0-0)                 | 0<br>(0-0)                 | 10<br>(3-22)               | 21<br>(5-46)               | 71<br>(18-147)             | 120<br>(30-250)            | 271<br>(72-578)            |
| Occupational exposure to polycyclic aromatic hydrocarbons | 0<br>(0-0)                 | 0<br>(0-0)                 | 4<br>(2-7)                 | 8<br>(4-15)                | 29<br>(13-48)              | 49<br>(23-82)              | 114<br>(54-189)            |
| Occupational exposure to silica                           | 0<br>(0-0)                 | 0<br>(0-0)                 | 18<br>(11-27)              | 35<br>(22-51)              | 119<br>(78-176)            | 204<br>(128-295)           | 475<br>(309-687)           |
| Occupational exposure to sulfuric acid                    | 0<br>(0-0)                 | 0<br>(0-0)                 | 2<br>(1-6)                 | 6<br>(1-14)                | 24<br>(6-54)               | 62<br>(17-133)             | 137<br>(39-313)            |
| Occupational asthmagens                                   | 599<br>(321-1,070)         | 1,015<br>(550-1,724)       | 1,297<br>(759-2,297)       | 1,366<br>(789-2,385)       | 1,990<br>(1,142-3,586)     | 2,203<br>(1,274-3,953)     | 3,215<br>(1,767-6,267)     |
| Occupational particulate matter, gases, and fumes         | 0<br>(0-0)                 | 0<br>(0-0)                 | 1,957<br>(870-3,137)       | 2,733<br>(1,241-4,284)     | 5,247<br>(2,475-7,973)     | 7,497<br>(3,477-11,275)    | 12,282<br>(5,760-18,910)   |
| Occupational noise                                        | 0<br>(0-0)                 |
| Occupational risk factors for injuries                    | 42,186<br>(32,031-54,441)  | 62,484<br>(47,379-78,894)  | 61,596<br>(47,535-78,950)  | 55,636<br>(43,322-70,176)  | 50,545<br>(38,086-65,576)  | 39,295<br>(29,958-51,536)  | 32,671<br>(24,713-42,382)  |
| Occupational low back pain                                | 0<br>(0-0)                 |
| Sexual abuse and violence                                 |                            |                            |                            |                            |                            |                            |                            |
| Childhood sexual abuse                                    |                            |                            |                            |                            |                            |                            |                            |
| Intimate partner violence                                 |                            |                            |                            |                            |                            |                            |                            |

**Web table 2: Global deaths attributable to risk factors by age and sex in 1990**

| Risk                                         | Both Sexes,<br>50-54 Years   | Both Sexes,<br>55-59 Years   | Both Sexes,<br>60-64 Years   | Both Sexes,<br>65-69 Years   | Both Sexes,<br>70-74 Years   | Both Sexes,<br>75-79 Years   | Both Sexes,<br>80+ Years     |
|----------------------------------------------|------------------------------|------------------------------|------------------------------|------------------------------|------------------------------|------------------------------|------------------------------|
| Unimproved water and sanitation              | 12,208<br>(559–22,606)       | 14,013<br>(674–26,636)       | 18,165<br>(839–33,832)       | 18,003<br>(956–34,015)       | 17,281<br>(817–31,539)       | 14,847<br>(675–27,465)       | 22,540<br>(1,141–42,258)     |
| Unimproved water source                      | 4,739<br>(333–9,386)         | 5,315<br>(349–10,712)        | 6,928<br>(476–13,975)        | 6,935<br>(490–14,009)        | 6,706<br>(462–13,312)        | 5,759<br>(379–11,451)        | 8,354<br>(557–16,738)        |
| Unimproved sanitation                        | 8,623<br>(241–16,628)        | 9,998<br>(302–19,738)        | 12,940<br>(375–25,359)       | 12,768<br>(411–25,168)       | 12,204<br>(375–23,181)       | 10,470<br>(294–20,309)       | 16,149<br>(526–31,362)       |
| Air pollution                                |                              |                              |                              |                              |                              |                              |                              |
| Ambient particulate matter pollution         | 153,983<br>(115,196–192,112) | 209,387<br>(154,733–262,761) | 298,263<br>(221,962–363,945) | 338,301<br>(242,865–428,504) | 358,003<br>(254,014–455,316) | 383,118<br>(269,356–479,667) | 616,245<br>(446,426–775,352) |
| Household air pollution from solid fuels     | 202,755<br>(155,059–252,858) | 280,260<br>(204,501–347,075) | 404,277<br>(304,818–503,518) | 470,322<br>(340,002–587,685) | 521,856<br>(384,311–647,975) | 494,845<br>(367,494–616,275) | 684,584<br>(513,241–844,161) |
| Ambient ozone pollution                      | 5,177<br>(1,646–9,059)       | 8,770<br>(2,946–15,191)      | 15,304<br>(5,044–26,797)     | 20,340<br>(6,760–35,495)     | 24,439<br>(7,980–43,118)     | 24,961<br>(8,361–43,752)     | 38,515<br>(12,636–68,569)    |
| Other environmental risks                    | 16,064<br>(13,428–18,935)    | 20,658<br>(17,532–24,487)    | 28,225<br>(23,631–32,909)    | 30,583<br>(25,883–35,708)    | 27,984<br>(23,778–32,554)    | 25,554<br>(21,950–29,609)    | 28,934<br>(24,483–33,616)    |
| Residential radon                            |                              |                              |                              |                              |                              |                              |                              |
| Lead exposure                                | 16,064<br>(13,428–18,935)    | 20,658<br>(17,532–24,487)    | 28,225<br>(23,631–32,909)    | 30,583<br>(25,883–35,708)    | 27,984<br>(23,778–32,554)    | 25,554<br>(21,950–29,609)    | 28,934<br>(24,483–33,616)    |
| Child and maternal undernutrition            | 2,172<br>(1,746–2,742)       | 2,466<br>(1,970–3,018)       | 3,237<br>(2,593–4,095)       | 3,739<br>(2,882–4,608)       | 4,289<br>(3,220–5,359)       | 4,727<br>(3,769–5,707)       | 12,272<br>(9,829–15,716)     |
| Suboptimal breastfeeding                     | 0<br>(0–0)                   |
| Non-exclusive breastfeeding                  | 0<br>(0–0)                   |
| Discontinued breastfeeding                   | 0<br>(0–0)                   |
| Childhood underweight                        | 0<br>(0–0)                   |
| Iron deficiency                              | 2,172<br>(1,746–2,742)       | 2,466<br>(1,970–3,018)       | 3,237<br>(2,593–4,095)       | 3,739<br>(2,882–4,608)       | 4,289<br>(3,220–5,359)       | 4,727<br>(3,769–5,707)       | 12,272<br>(9,829–15,716)     |
| Vitamin A deficiency                         | 0<br>(0–0)                   |
| Zinc deficiency                              | 0<br>(0–0)                   |
| Tobacco smoking, including second-hand smoke | 354,117<br>(305,997–409,523) | 504,076<br>(436,766–572,170) | 699,533<br>(613,467–809,735) | 754,382<br>(653,086–877,163) | 704,789<br>(607,727–835,419) | 661,054<br>(574,612–791,875) | 815,718<br>(724,642–975,917) |
| Tobacco smoking                              | 336,664<br>(286,095–390,454) | 479,593<br>(410,114–550,117) | 662,516<br>(578,130–776,123) | 707,104<br>(605,090–835,158) | 649,923<br>(546,578–787,963) | 592,676<br>(501,914–729,204) | 692,989<br>(600,545–853,693) |
| Second-hand smoke                            | 17,453<br>(11,475–22,950)    | 24,483<br>(16,042–32,643)    | 37,017<br>(25,005–47,972)    | 47,278<br>(31,514–61,370)    | 54,867<br>(36,467–71,706)    | 68,378<br>(45,114–89,123)    | 122,730<br>(82,559–158,720)  |
| Alcohol and drug use                         | 181,336<br>(163,328–201,168) | 199,573<br>(179,406–220,909) | 233,134<br>(209,831–258,238) | 164,187<br>(142,802–186,468) | 150,663<br>(126,807–175,752) | 172,125<br>(139,474–205,006) | 274,161<br>(202,549–342,896) |
| Alcohol use                                  | 177,477<br>(160,047–196,924) | 195,975<br>(176,208–217,417) | 229,408<br>(205,667–253,994) | 163,475<br>(142,034–185,753) | 150,057<br>(126,213–174,947) | 171,510<br>(138,335–204,226) | 273,299<br>(201,849–341,898) |

**Web table 2: Global deaths attributable to risk factors by age and sex in 1990**

| Risk                                          | Both Sexes,<br>50-54 Years   | Both Sexes,<br>55-59 Years   | Both Sexes,<br>60-64 Years   | Both Sexes,<br>65-69 Years       | Both Sexes,<br>70-74 Years         | Both Sexes,<br>75-79 Years         | Both Sexes,<br>80+ Years           |
|-----------------------------------------------|------------------------------|------------------------------|------------------------------|----------------------------------|------------------------------------|------------------------------------|------------------------------------|
| Drug use                                      | 5,079<br>(3,940–7,833)       | 5,180<br>(4,174–6,754)       | 5,660<br>(4,564–7,272)       | 719<br>(446–1,556)               | 608<br>(369–1,350)                 | 616<br>(378–1,471)                 | 863<br>(535–1,814)                 |
| Physiological risk factors                    |                              |                              |                              |                                  |                                    |                                    |                                    |
| High fasting plasma glucose                   | 121,197<br>(102,076–140,404) | 188,743<br>(161,417–216,663) | 257,298<br>(219,588–295,809) | 294,771<br>(252,165–338,515)     | 295,064<br>(253,038–336,396)       | 315,731<br>(268,146–363,215)       | 452,433<br>(377,324–526,954)       |
| High total cholesterol                        | 106,684<br>(88,422–128,490)  | 143,686<br>(120,138–172,016) | 219,427<br>(184,729–260,203) | 252,714<br>(211,177–299,748)     | 254,294<br>(207,320–305,071)       | 304,678<br>(229,057–382,894)       | 518,749<br>(430,665–616,469)       |
| High blood pressure                           | 309,067<br>(272,582–344,096) | 489,089<br>(445,089–536,945) | 699,044<br>(636,123–763,143) | 913,347<br>(843,638–987,707)     | 982,652<br>(902,304–1,064,189)     | 1,237,217<br>(1,150,597–1,330,466) | 2,233,369<br>(2,072,674–2,395,549) |
| High body-mass index                          | 111,174<br>(88,853–134,231)  | 150,280<br>(121,996–179,090) | 225,528<br>(184,629–268,018) | 250,389<br>(204,653–296,981)     | 252,985<br>(205,756–300,698)       | 306,079<br>(248,017–364,250)       | 495,725<br>(394,933–595,018)       |
| Low bone mineral density                      | 6,377<br>(5,129–8,417)       | 6,735<br>(5,572–9,003)       | 9,619<br>(7,911–12,654)      | 10,467<br>(8,767–13,533)         | 11,996<br>(9,889–15,532)           | 16,469<br>(13,605–20,231)          | 41,607<br>(34,733–51,278)          |
| Dietary risk factors and physical inactivity  | 455,752<br>(416,811–493,423) | 622,396<br>(570,926–682,573) | 893,238<br>(826,814–968,533) | 1,055,055<br>(971,070–1,147,752) | 1,120,788<br>(1,018,781–1,218,539) | 1,305,019<br>(1,194,259–1,405,988) | 2,235,976<br>(2,033,797–2,441,236) |
| Diet low in fruits                            | 247,368<br>(195,365–295,444) | 330,243<br>(260,938–394,552) | 437,004<br>(342,928–524,072) | 491,356<br>(383,410–591,189)     | 501,139<br>(384,169–606,863)       | 527,333<br>(406,357–637,893)       | 753,617<br>(574,447–937,991)       |
| Diet low in vegetables                        | 93,858<br>(60,363–127,357)   | 118,742<br>(76,506–160,571)  | 162,636<br>(109,837–217,063) | 181,552<br>(120,281–245,603)     | 185,412<br>(121,118–248,751)       | 213,306<br>(140,887–284,291)       | 337,590<br>(217,813–456,746)       |
| Diet low in whole grains                      | 81,246<br>(64,086–97,780)    | 103,164<br>(79,656–124,730)  | 141,270<br>(110,144–171,151) | 155,604<br>(121,285–189,679)     | 159,098<br>(123,211–194,176)       | 178,169<br>(138,062–217,469)       | 271,161<br>(207,620–330,147)       |
| Diet low in nuts and seeds                    | 111,554<br>(74,047–142,047)  | 142,171<br>(93,026–181,813)  | 205,026<br>(130,945–262,876) | 236,017<br>(151,491–305,030)     | 239,267<br>(150,031–312,742)       | 285,812<br>(176,211–378,999)       | 510,127<br>(307,343–687,140)       |
| Diet low in milk                              | 4,480<br>(1,342–7,537)       | 6,210<br>(1,882–10,387)      | 8,422<br>(2,509–14,283)      | 9,470<br>(2,869–15,951)          | 9,137<br>(2,755–15,417)            | 9,746<br>(2,870–16,518)            | 12,745<br>(3,799–21,646)           |
| Diet high in red meat                         | 1,565<br>(432–2,668)         | 2,232<br>(636–3,749)         | 3,219<br>(888–5,516)         | 3,695<br>(1,021–6,263)           | 3,537<br>(991–6,049)               | 4,092<br>(1,133–7,011)             | 5,639<br>(1,587–9,611)             |
| Diet high in processed meat                   | 43,948<br>(9,601–75,859)     | 55,068<br>(12,170–93,279)    | 78,524<br>(17,475–134,060)   | 88,763<br>(20,024–151,631)       | 86,454<br>(18,835–148,797)         | 108,427<br>(23,516–185,745)        | 197,284<br>(41,058–342,137)        |
| Diet high in sugar-sweetened beverages        | 10,146<br>(3,554–15,074)     | 11,898<br>(7,754–17,678)     | 15,564<br>(9,891–23,864)     | 16,502<br>(10,112–25,674)        | 16,924<br>(9,498–28,179)           | 17,759<br>(8,803–27,439)           | 31,064<br>(12,974–40,837)          |
| Diet low in fibre                             | 39,177<br>(17,575–60,976)    | 47,839<br>(21,863–74,132)    | 63,758<br>(28,529–100,201)   | 69,407<br>(31,095–109,180)       | 70,823<br>(31,751–110,932)         | 81,230<br>(36,106–127,036)         | 137,708<br>(58,707–220,544)        |
| Diet low in calcium                           | 5,186<br>(3,832–6,662)       | 7,234<br>(5,344–9,249)       | 9,835<br>(7,109–12,660)      | 11,180<br>(7,847–14,515)         | 11,232<br>(7,815–14,953)           | 12,067<br>(8,100–16,400)           | 15,934<br>(9,962–22,384)           |
| Diet low in seafood omega-3 fatty acids       | 67,795<br>(48,998–86,842)    | 83,712<br>(60,974–106,207)   | 117,624<br>(85,521–151,079)  | 131,006<br>(95,435–167,297)      | 128,812<br>(93,516–165,056)        | 148,437<br>(106,505–189,709)       | 249,026<br>(177,820–319,888)       |
| Diet low in polyunsaturated fatty acids       | 28,349<br>(13,490–43,070)    | 35,405<br>(17,034–54,306)    | 49,579<br>(23,226–76,258)    | 55,547<br>(26,875–85,096)        | 55,064<br>(26,147–84,676)          | 64,320<br>(30,650–98,764)          | 110,031<br>(51,875–169,860)        |
| Diet high in trans fatty acids                | 22,695<br>(16,321–29,163)    | 28,940<br>(21,064–37,224)    | 40,008<br>(29,146–51,205)    | 46,610<br>(33,742–59,504)        | 46,742<br>(33,517–60,144)          | 50,922<br>(36,415–65,201)          | 91,011<br>(65,291–116,840)         |
| Diet high in sodium                           | 122,481<br>(81,236–160,829)  | 174,255<br>(114,847–229,333) | 257,126<br>(167,111–335,173) | 310,128<br>(200,260–411,711)     | 320,993<br>(207,275–425,369)       | 349,350<br>(223,587–467,206)       | 539,635<br>(339,477–729,560)       |
| Physical inactivity and low physical activity |                              |                              |                              |                                  |                                    |                                    |                                    |

**Web table 2: Global deaths attributable to risk factors by age and sex in 1990**

| Risk                                                      | Both Sexes,<br>50-54 Years | Both Sexes,<br>55-59 Years | Both Sexes,<br>60-64 Years | Both Sexes,<br>65-69 Years | Both Sexes,<br>70-74 Years | Both Sexes,<br>75-79 Years | Both Sexes,<br>80+ Years |
|-----------------------------------------------------------|----------------------------|----------------------------|----------------------------|----------------------------|----------------------------|----------------------------|--------------------------|
| Occupational risk factors                                 | 63,881<br>(48,234-80,919)  | 75,377<br>(52,632-98,373)  | 85,527<br>(53,825-117,633) | 61,733<br>(37,036-88,656)  | 66,642<br>(38,417-99,530)  | 57,534<br>(31,414-86,228)  | 7,156<br>(5,467-9,811)   |
| Occupational carcinogens                                  | 6,059<br>(4,059-8,735)     | 10,239<br>(6,779-14,559)   | 13,664<br>(9,269-19,669)   | 11,136<br>(7,769-15,574)   | 9,754<br>(6,802-14,238)    | 6,586<br>(4,875-9,255)     | 7,156<br>(5,467-9,811)   |
| Occupational exposure to asbestos                         | 1,247<br>(897-1,785)       | 1,985<br>(1,399-2,874)     | 2,983<br>(2,157-4,365)     | 3,806<br>(2,736-5,445)     | 3,395<br>(2,471-4,976)     | 3,553<br>(2,584-5,228)     | 4,246<br>(3,220-6,172)   |
| Occupational exposure to arsenic                          | 163<br>(63-301)            | 287<br>(108-537)           | 366<br>(142-695)           | 242<br>(91-459)            | 214<br>(81-405)            | 93<br>(35-178)             | 92<br>(34-177)           |
| Occupational exposure to benzene                          | 63<br>(26-114)             | 89<br>(36-158)             | 111<br>(47-196)            | 161<br>(67-286)            | 151<br>(63-271)            | 198<br>(82-351)            | 157<br>(63-291)          |
| Occupational exposure to beryllium                        | 9<br>(3-15)                | 15<br>(6-26)               | 20<br>(8-35)               | 13<br>(5-23)               | 11<br>(5-21)               | 5<br>(2-9)                 | 5<br>(2-9)               |
| Occupational exposure to cadmium                          | 29<br>(13-49)              | 51<br>(23-84)              | 66<br>(30-112)             | 43<br>(19-75)              | 38<br>(17-65)              | 17<br>(8-29)               | 17<br>(7-29)             |
| Occupational exposure to chromium                         | 103<br>(62-153)            | 179<br>(108-266)           | 232<br>(141-355)           | 153<br>(93-237)            | 134<br>(80-212)            | 60<br>(36-94)              | 60<br>(36-95)            |
| Occupational exposure to diesel engine exhaust            | 1,306<br>(753-2,019)       | 2,291<br>(1,299-3,545)     | 2,975<br>(1,722-4,628)     | 1,990<br>(1,136-3,143)     | 1,718<br>(973-2,768)       | 774<br>(438-1,280)         | 742<br>(423-1,215)       |
| Occupational exposure to second-hand smoke                | 1,402<br>(954-1,966)       | 2,454<br>(1,705-3,397)     | 3,172<br>(2,237-4,471)     | 2,111<br>(1,473-3,086)     | 1,844<br>(1,308-2,746)     | 824<br>(591-1,224)         | 828<br>(587-1,223)       |
| Occupational exposure to formaldehyde                     | 25<br>(9-50)               | 34<br>(12-70)              | 36<br>(13-73)              | 45<br>(17-89)              | 37<br>(14-70)              | 41<br>(17-79)              | 24<br>(10-45)            |
| Occupational exposure to nickel                           | 503<br>(133-1,046)         | 878<br>(226-1,814)         | 1,135<br>(304-2,351)       | 751<br>(198-1,584)         | 660<br>(173-1,386)         | 291<br>(75-621)            | 291<br>(76-622)          |
| Occupational exposure to polycyclic aromatic hydrocarbons | 213<br>(100-356)           | 373<br>(175-618)           | 486<br>(233-819)           | 322<br>(151-548)           | 280<br>(132-481)           | 126<br>(59-216)            | 126<br>(58-215)          |
| Occupational exposure to silica                           | 900<br>(581-1,299)         | 1,588<br>(1,033-2,277)     | 2,066<br>(1,381-2,952)     | 1,388<br>(904-2,056)       | 1,200<br>(798-1,824)       | 544<br>(367-870)           | 520<br>(353-812)         |
| Occupational exposure to sulfuric acid                    | 263<br>(72-579)            | 363<br>(102-800)           | 464<br>(132-990)           | 326<br>(87-744)            | 259<br>(73-576)            | 124<br>(34-273)            | 127<br>(38-281)          |
| Occupational asthmagens                                   | 4,450<br>(2,481-8,563)     | 5,589<br>(3,208-10,205)    | 6,439<br>(3,572-11,910)    | 4,738<br>(2,523-8,733)     | 4,945<br>(2,700-8,865)     | 4,305<br>(2,367-7,892)     | 0<br>(0-0)               |
| Occupational particulate matter, gases, and fumes         | 24,369<br>(11,159-36,950)  | 36,913<br>(16,391-57,272)  | 51,476<br>(22,708-80,942)  | 39,808<br>(16,946-64,387)  | 47,929<br>(20,380-77,601)  | 45,435<br>(19,972-73,241)  | 0<br>(0-0)               |
| Occupational noise                                        | 0<br>(0-0)                 | 0<br>(0-0)                 | 0<br>(0-0)                 | 0<br>(0-0)                 | 0<br>(0-0)                 | 0<br>(0-0)                 | 0<br>(0-0)               |
| Occupational risk factors for injuries                    | 29,003<br>(22,110-37,199)  | 22,636<br>(17,127-29,346)  | 13,948<br>(10,576-17,974)  | 6,051<br>(4,484-8,062)     | 4,015<br>(3,020-5,360)     | 1,208<br>(918-1,566)       | 0<br>(0-0)               |
| Occupational low back pain                                | 0<br>(0-0)                 | 0<br>(0-0)                 | 0<br>(0-0)                 | 0<br>(0-0)                 | 0<br>(0-0)                 | 0<br>(0-0)                 | 0<br>(0-0)               |
| Sexual abuse and violence                                 |                            |                            |                            |                            |                            |                            |                          |
| Childhood sexual abuse                                    |                            |                            |                            |                            |                            |                            |                          |
| Intimate partner violence                                 |                            |                            |                            |                            |                            |                            |                          |



**Web table 2: Global deaths attributable to risk factors by age and sex in 1990**

| Risk                                         | Males,<br>All Ages                 | Males,<br>0-6 Days        | Males,<br>7-27 Days         | Males,<br>28-364 Days          | Males,<br>1-4 Years          | Males,<br>5-9 Years    | Males,<br>10-14 Years  |
|----------------------------------------------|------------------------------------|---------------------------|-----------------------------|--------------------------------|------------------------------|------------------------|------------------------|
| Unimproved water and sanitation              | 365,244<br>(18,940–662,551)        | 9,714<br>(471–19,232)     | 23,554<br>(1,223–44,532)    | 116,863<br>(6,173–217,301)     | 98,900<br>(5,299–182,571)    | 15,407<br>(692–29,583) | 6,690<br>(278–12,938)  |
| Unimproved water source                      | 147,857<br>(10,566–282,890)        | 3,899<br>(261–8,160)      | 9,388<br>(652–18,799)       | 47,882<br>(3,500–93,262)       | 42,260<br>(3,084–83,475)     | 5,974<br>(397–12,180)  | 2,618<br>(169–5,387)   |
| Unimproved sanitation                        | 252,779<br>(8,032–480,822)         | 6,757<br>(197–14,052)     | 16,412<br>(529–32,682)      | 80,203<br>(2,557–156,244)      | 66,926<br>(2,196–129,052)    | 10,869<br>(289–21,640) | 4,690<br>(115–9,507)   |
| Air pollution                                |                                    |                           |                             |                                |                              |                        |                        |
| Ambient particulate matter pollution         | 1,549,448<br>(1,345,894–1,752,880) | 19,847<br>(12,268–28,231) | 20,195<br>(13,181–27,975)   | 78,126<br>(52,893–105,889)     | 51,267<br>(33,908–71,030)    | 0<br>(0–0)             | 0<br>(0–0)             |
| Household air pollution from solid fuels     | 2,251,932<br>(1,677,785–2,743,681) | 68,924<br>(44,458–91,790) | 71,317<br>(47,905–92,928)   | 274,648<br>(193,690–350,438)   | 191,888<br>(133,782–252,410) | 0<br>(0–0)             | 0<br>(0–0)             |
| Ambient ozone pollution                      | 77,087<br>(25,256–134,021)         | 0<br>(0–0)                | 0<br>(0–0)                  | 0<br>(0–0)                     | 0<br>(0–0)                   | 0<br>(0–0)             | 0<br>(0–0)             |
| Other environmental risks                    | 109,224<br>(91,805–131,511)        | 0<br>(0–0)                | 0<br>(0–0)                  | 0<br>(0–0)                     | 0<br>(0–0)                   | 0<br>(0–0)             | 0<br>(0–0)             |
| Residential radon                            |                                    |                           |                             |                                |                              |                        |                        |
| Lead exposure                                | 109,224<br>(91,805–131,511)        | 0<br>(0–0)                | 0<br>(0–0)                  | 0<br>(0–0)                     | 0<br>(0–0)                   | 0<br>(0–0)             | 0<br>(0–0)             |
| Child and maternal undernutrition            | 1,805,224<br>(1,479,043–2,219,888) | 0<br>(0–0)                | 138,589<br>(83,615–190,605) | 895,272<br>(729,496–1,076,442) | 746,855<br>(581,453–987,070) | 1,347<br>(999–1,869)   | 953<br>(718–1,277)     |
| Suboptimal breastfeeding                     | 693,103<br>(427,028–972,440)       | 0<br>(0–0)                | 138,589<br>(83,615–190,605) | 510,324<br>(306,882–731,098)   | 44,190<br>(4,756–94,710)     | 0<br>(0–0)             | 0<br>(0–0)             |
| Non-exclusive breastfeeding                  | 612,059<br>(354,236–875,230)       | 0<br>(0–0)                | 138,589<br>(83,615–190,605) | 473,470<br>(272,590–693,746)   | 0<br>(0–0)                   | 0<br>(0–0)             | 0<br>(0–0)             |
| Discontinued breastfeeding                   | 81,044<br>(8,643–178,237)          | 0<br>(0–0)                | 0<br>(0–0)                  | 36,854<br>(3,671–82,696)       | 44,190<br>(4,756–94,710)     | 0<br>(0–0)             | 0<br>(0–0)             |
| Childhood underweight                        | 1,198,178<br>(997,627–1,484,105)   | 0<br>(0–0)                | 0<br>(0–0)                  | 600,286<br>(501,285–710,497)   | 597,892<br>(477,020–773,832) | 0<br>(0–0)             | 0<br>(0–0)             |
| Iron deficiency                              | 39,409<br>(30,677–47,108)          | 0<br>(0–0)                | 0<br>(0–0)                  | 5,232<br>(3,964–6,784)         | 9,669<br>(6,684–13,961)      | 1,347<br>(999–1,869)   | 953<br>(718–1,277)     |
| Vitamin A deficiency                         | 181,151<br>(85,775–341,439)        | 0<br>(0–0)                | 0<br>(0–0)                  | 45,590<br>(20,830–78,943)      | 135,562<br>(61,576–267,698)  | 0<br>(0–0)             | 0<br>(0–0)             |
| Zinc deficiency                              | 143,518<br>(27,797–276,850)        | 0<br>(0–0)                | 0<br>(0–0)                  | 0<br>(0–0)                     | 143,518<br>(27,797–276,850)  | 0<br>(0–0)             | 0<br>(0–0)             |
| Tobacco smoking, including second-hand smoke | 3,680,571<br>(3,213,427–4,229,530) | 21,532<br>(13,294–29,845) | 22,676<br>(14,782–31,004)   | 92,943<br>(63,260–123,193)     | 57,589<br>(38,090–78,687)    | 0<br>(0–0)             | 0<br>(0–0)             |
| Tobacco smoking                              | 3,332,192<br>(2,871,957–3,840,033) | 0<br>(0–0)                | 0<br>(0–0)                  | 0<br>(0–0)                     | 0<br>(0–0)                   | 0<br>(0–0)             | 0<br>(0–0)             |
| Second-hand smoke                            | 348,378<br>(273,555–425,310)       | 21,532<br>(13,294–29,845) | 22,676<br>(14,782–31,004)   | 92,943<br>(63,260–123,193)     | 57,589<br>(38,090–78,687)    | 0<br>(0–0)             | 0<br>(0–0)             |
| Alcohol and drug use                         | 1,345,743<br>(1,196,535–1,513,476) | 247<br>(139–455)          | 207<br>(92–393)             | 912<br>(512–1,717)             | 3,525<br>(1,951–5,657)       | 2,017<br>(1,481–2,764) | 1,680<br>(1,302–2,162) |
| Alcohol use                                  | 1,305,926<br>(1,156,571–1,466,638) | 125<br>(78–205)           | 70<br>(37–130)              | 529<br>(327–844)               | 2,725<br>(1,528–4,423)       | 1,764<br>(1,310–2,248) | 1,500<br>(1,173–1,865) |

**Web table 2: Global deaths attributable to risk factors by age and sex in 1990**

| Risk                                          | Males,<br>All Ages                 | Males,<br>0-6 Days | Males,<br>7-27 Days | Males,<br>28-364 Days | Males,<br>1-4 Years | Males,<br>5-9 Years | Males,<br>10-14 Years |
|-----------------------------------------------|------------------------------------|--------------------|---------------------|-----------------------|---------------------|---------------------|-----------------------|
| Drug use                                      | 46,682<br>(33,063–78,398)          | 122<br>(33–293)    | 137<br>(37–300)     | 383<br>(126–1,050)    | 799<br>(184–1,881)  | 252<br>(80–701)     | 181<br>(73–475)       |
| Physiological risk factors                    |                                    |                    |                     |                       |                     |                     |                       |
| High fasting plasma glucose                   | 1,051,401<br>(865,949–1,250,550)   | 0<br>(0–0)         | 0<br>(0–0)          | 0<br>(0–0)            | 0<br>(0–0)          | 0<br>(0–0)          | 0<br>(0–0)            |
| High total cholesterol                        | 936,749<br>(767,684–1,128,051)     | 0<br>(0–0)         | 0<br>(0–0)          | 0<br>(0–0)            | 0<br>(0–0)          | 0<br>(0–0)          | 0<br>(0–0)            |
| High blood pressure                           | 3,412,588<br>(3,089,548–3,769,223) | 0<br>(0–0)         | 0<br>(0–0)          | 0<br>(0–0)            | 0<br>(0–0)          | 0<br>(0–0)          | 0<br>(0–0)            |
| High body-mass index                          | 887,047<br>(698,599–1,079,235)     | 0<br>(0–0)         | 0<br>(0–0)          | 0<br>(0–0)            | 0<br>(0–0)          | 0<br>(0–0)          | 0<br>(0–0)            |
| Low bone mineral density                      | 52,816<br>(43,822–69,605)          | 0<br>(0–0)         | 0<br>(0–0)          | 0<br>(0–0)            | 0<br>(0–0)          | 0<br>(0–0)          | 0<br>(0–0)            |
| Dietary risk factors and physical inactivity  | 4,387,218<br>(4,017,891–4,762,455) | 0<br>(0–0)         | 0<br>(0–0)          | 0<br>(0–0)            | 0<br>(0–0)          | 0<br>(0–0)          | 0<br>(0–0)            |
| Diet low in fruits                            | 2,013,415<br>(1,570,347–2,435,112) | 0<br>(0–0)         | 0<br>(0–0)          | 0<br>(0–0)            | 0<br>(0–0)          | 0<br>(0–0)          | 0<br>(0–0)            |
| Diet low in vegetables                        | 779,747<br>(535,472–1,041,517)     | 0<br>(0–0)         | 0<br>(0–0)          | 0<br>(0–0)            | 0<br>(0–0)          | 0<br>(0–0)          | 0<br>(0–0)            |
| Diet low in whole grains                      | 649,676<br>(503,984–787,057)       | 0<br>(0–0)         | 0<br>(0–0)          | 0<br>(0–0)            | 0<br>(0–0)          | 0<br>(0–0)          | 0<br>(0–0)            |
| Diet low in nuts and seeds                    | 1,041,726<br>(667,481–1,349,266)   | 0<br>(0–0)         | 0<br>(0–0)          | 0<br>(0–0)            | 0<br>(0–0)          | 0<br>(0–0)          | 0<br>(0–0)            |
| Diet low in milk                              | 34,838<br>(10,464–58,211)          | 0<br>(0–0)         | 0<br>(0–0)          | 0<br>(0–0)            | 0<br>(0–0)          | 0<br>(0–0)          | 0<br>(0–0)            |
| Diet high in red meat                         | 13,888<br>(3,859–23,763)           | 0<br>(0–0)         | 0<br>(0–0)          | 0<br>(0–0)            | 0<br>(0–0)          | 0<br>(0–0)          | 0<br>(0–0)            |
| Diet high in processed meat                   | 397,198<br>(85,536–688,905)        | 0<br>(0–0)         | 0<br>(0–0)          | 0<br>(0–0)            | 0<br>(0–0)          | 0<br>(0–0)          | 0<br>(0–0)            |
| Diet high in sugar-sweetened beverages        | 80,874<br>(50,739–111,941)         | 0<br>(0–0)         | 0<br>(0–0)          | 0<br>(0–0)            | 0<br>(0–0)          | 0<br>(0–0)          | 0<br>(0–0)            |
| Diet low in fibre                             | 333,603<br>(149,007–521,712)       | 0<br>(0–0)         | 0<br>(0–0)          | 0<br>(0–0)            | 0<br>(0–0)          | 0<br>(0–0)          | 0<br>(0–0)            |
| Diet low in calcium                           | 48,975<br>(32,814–66,562)          | 0<br>(0–0)         | 0<br>(0–0)          | 0<br>(0–0)            | 0<br>(0–0)          | 0<br>(0–0)          | 0<br>(0–0)            |
| Diet low in seafood omega-3 fatty acids       | 576,646<br>(418,376–735,746)       | 0<br>(0–0)         | 0<br>(0–0)          | 0<br>(0–0)            | 0<br>(0–0)          | 0<br>(0–0)          | 0<br>(0–0)            |
| Diet low in polyunsaturated fatty acids       | 248,677<br>(117,929–381,787)       | 0<br>(0–0)         | 0<br>(0–0)          | 0<br>(0–0)            | 0<br>(0–0)          | 0<br>(0–0)          | 0<br>(0–0)            |
| Diet high in trans fatty acids                | 202,725<br>(144,395–260,843)       | 0<br>(0–0)         | 0<br>(0–0)          | 0<br>(0–0)            | 0<br>(0–0)          | 0<br>(0–0)          | 0<br>(0–0)            |
| Diet high in sodium                           | 1,197,713<br>(776,962–1,589,448)   | 0<br>(0–0)         | 0<br>(0–0)          | 0<br>(0–0)            | 0<br>(0–0)          | 0<br>(0–0)          | 0<br>(0–0)            |
| Physical inactivity and low physical activity |                                    |                    |                     |                       |                     |                     |                       |

**Web table 2: Global deaths attributable to risk factors by age and sex in 1990**

| Risk                                                      | Males,<br>All Ages           | Males,<br>0-6 Days | Males,<br>7-27 Days | Males,<br>28-364 Days | Males,<br>1-4 Years | Males,<br>5-9 Years | Males,<br>10-14 Years |
|-----------------------------------------------------------|------------------------------|--------------------|---------------------|-----------------------|---------------------|---------------------|-----------------------|
| Occupational risk factors                                 | 694,403<br>(541,113–858,435) | 0<br>(0–0)         | 0<br>(0–0)          | 0<br>(0–0)            | 0<br>(0–0)          | 0<br>(0–0)          | 0<br>(0–0)            |
| Occupational carcinogens                                  | 55,306<br>(37,867–80,887)    | 0<br>(0–0)         | 0<br>(0–0)          | 0<br>(0–0)            | 0<br>(0–0)          | 0<br>(0–0)          | 0<br>(0–0)            |
| Occupational exposure to asbestos                         | 17,024<br>(11,044–26,605)    | 0<br>(0–0)         | 0<br>(0–0)          | 0<br>(0–0)            | 0<br>(0–0)          | 0<br>(0–0)          | 0<br>(0–0)            |
| Occupational exposure to arsenic                          | 1,155<br>(446–2,210)         | 0<br>(0–0)         | 0<br>(0–0)          | 0<br>(0–0)            | 0<br>(0–0)          | 0<br>(0–0)          | 0<br>(0–0)            |
| Occupational exposure to benzene                          | 993<br>(426–1,757)           | 0<br>(0–0)         | 0<br>(0–0)          | 0<br>(0–0)            | 0<br>(0–0)          | 0<br>(0–0)          | 0<br>(0–0)            |
| Occupational exposure to beryllium                        | 61<br>(24–110)               | 0<br>(0–0)         | 0<br>(0–0)          | 0<br>(0–0)            | 0<br>(0–0)          | 0<br>(0–0)          | 0<br>(0–0)            |
| Occupational exposure to cadmium                          | 214<br>(97–370)              | 0<br>(0–0)         | 0<br>(0–0)          | 0<br>(0–0)            | 0<br>(0–0)          | 0<br>(0–0)          | 0<br>(0–0)            |
| Occupational exposure to chromium                         | 729<br>(431–1,133)           | 0<br>(0–0)         | 0<br>(0–0)          | 0<br>(0–0)            | 0<br>(0–0)          | 0<br>(0–0)          | 0<br>(0–0)            |
| Occupational exposure to diesel engine exhaust            | 10,979<br>(6,241–17,555)     | 0<br>(0–0)         | 0<br>(0–0)          | 0<br>(0–0)            | 0<br>(0–0)          | 0<br>(0–0)          | 0<br>(0–0)            |
| Occupational exposure to second-hand smoke                | 10,171<br>(6,878–15,272)     | 0<br>(0–0)         | 0<br>(0–0)          | 0<br>(0–0)            | 0<br>(0–0)          | 0<br>(0–0)          | 0<br>(0–0)            |
| Occupational exposure to formaldehyde                     | 299<br>(117–584)             | 0<br>(0–0)         | 0<br>(0–0)          | 0<br>(0–0)            | 0<br>(0–0)          | 0<br>(0–0)          | 0<br>(0–0)            |
| Occupational exposure to nickel                           | 3,578<br>(935–7,585)         | 0<br>(0–0)         | 0<br>(0–0)          | 0<br>(0–0)            | 0<br>(0–0)          | 0<br>(0–0)          | 0<br>(0–0)            |
| Occupational exposure to polycyclic aromatic hydrocarbons | 1,638<br>(772–2,817)         | 0<br>(0–0)         | 0<br>(0–0)          | 0<br>(0–0)            | 0<br>(0–0)          | 0<br>(0–0)          | 0<br>(0–0)            |
| Occupational exposure to silica                           | 7,870<br>(5,154–11,902)      | 0<br>(0–0)         | 0<br>(0–0)          | 0<br>(0–0)            | 0<br>(0–0)          | 0<br>(0–0)          | 0<br>(0–0)            |
| Occupational exposure to sulfuric acid                    | 1,964<br>(531–4,383)         | 0<br>(0–0)         | 0<br>(0–0)          | 0<br>(0–0)            | 0<br>(0–0)          | 0<br>(0–0)          | 0<br>(0–0)            |
| Occupational asthmagens                                   | 31,666<br>(15,305–62,856)    | 0<br>(0–0)         | 0<br>(0–0)          | 0<br>(0–0)            | 0<br>(0–0)          | 0<br>(0–0)          | 0<br>(0–0)            |
| Occupational particulate matter, gases, and fumes         | 207,366<br>(92,516–320,244)  | 0<br>(0–0)         | 0<br>(0–0)          | 0<br>(0–0)            | 0<br>(0–0)          | 0<br>(0–0)          | 0<br>(0–0)            |
| Occupational noise                                        | 0<br>(0–0)                   | 0<br>(0–0)         | 0<br>(0–0)          | 0<br>(0–0)            | 0<br>(0–0)          | 0<br>(0–0)          | 0<br>(0–0)            |
| Occupational risk factors for injuries                    | 400,064<br>(308,482–507,787) | 0<br>(0–0)         | 0<br>(0–0)          | 0<br>(0–0)            | 0<br>(0–0)          | 0<br>(0–0)          | 0<br>(0–0)            |
| Occupational low back pain                                | 0<br>(0–0)                   | 0<br>(0–0)         | 0<br>(0–0)          | 0<br>(0–0)            | 0<br>(0–0)          | 0<br>(0–0)          | 0<br>(0–0)            |
| Sexual abuse and violence                                 |                              |                    |                     |                       |                     |                     |                       |
| Childhood sexual abuse                                    |                              |                    |                     |                       |                     |                     |                       |
| Intimate partner violence                                 |                              |                    |                     |                       |                     |                     |                       |

**Web table 2: Global deaths attributable to risk factors by age and sex in 1990**

| Risk                                         | Males,<br>15-19 Years     | Males,<br>20-24 Years     | Males,<br>25-29 Years     | Males,<br>30-34 Years     | Males,<br>35-39 Years       | Males,<br>40-44 Years       | Males,<br>45-49 Years        |
|----------------------------------------------|---------------------------|---------------------------|---------------------------|---------------------------|-----------------------------|-----------------------------|------------------------------|
| Unimproved water and sanitation              | 6,060<br>(243-12,157)     | 6,185<br>(273-12,097)     | 6,072<br>(294-11,732)     | 5,994<br>(267-11,216)     | 5,996<br>(305-11,525)       | 5,386<br>(273-10,413)       | 5,718<br>(300-11,445)        |
| Unimproved water source                      | 2,360<br>(140-4,941)      | 2,409<br>(158-4,956)      | 2,378<br>(157-4,953)      | 2,317<br>(144-4,733)      | 2,307<br>(168-4,669)        | 2,092<br>(149-4,301)        | 2,197<br>(154-4,655)         |
| Unimproved sanitation                        | 4,261<br>(104-8,763)      | 4,353<br>(121-8,862)      | 4,268<br>(128-8,585)      | 4,239<br>(125-8,317)      | 4,251<br>(126-8,465)        | 3,805<br>(124-7,826)        | 4,057<br>(127-8,388)         |
| Air pollution                                |                           |                           |                           |                           |                             |                             |                              |
| Ambient particulate matter pollution         | 0<br>(0-0)                | 0<br>(0-0)                | 11,815<br>(8,374-15,020)  | 18,338<br>(13,459-23,322) | 28,085<br>(21,191-35,215)   | 41,435<br>(31,066-52,006)   | 56,651<br>(42,144-70,458)    |
| Household air pollution from solid fuels     | 0<br>(0-0)                | 0<br>(0-0)                | 15,155<br>(10,904-19,627) | 22,666<br>(16,461-29,461) | 33,081<br>(24,023-43,365)   | 47,332<br>(33,692-61,314)   | 65,689<br>(46,898-84,341)    |
| Ambient ozone pollution                      | 0<br>(0-0)                | 0<br>(0-0)                | 207<br>(62-396)           | 281<br>(87-524)           | 513<br>(163-967)            | 777<br>(244-1,441)          | 1,392<br>(411-2,480)         |
| Other environmental risks                    | 0<br>(0-0)                | 0<br>(0-0)                | 1,285<br>(1,017-1,782)    | 1,983<br>(1,573-2,555)    | 2,871<br>(2,355-3,501)      | 4,263<br>(3,538-5,162)      | 5,987<br>(4,941-7,279)       |
| Residential radon                            |                           |                           |                           |                           |                             |                             |                              |
| Lead exposure                                | 0<br>(0-0)                | 0<br>(0-0)                | 1,285<br>(1,017-1,782)    | 1,983<br>(1,573-2,555)    | 2,871<br>(2,355-3,501)      | 4,263<br>(3,538-5,162)      | 5,987<br>(4,941-7,279)       |
| Child and maternal undernutrition            | 1,243<br>(845-1,652)      | 1,352<br>(917-1,821)      | 1,166<br>(860-1,510)      | 1,139<br>(769-1,505)      | 1,148<br>(738-1,490)        | 1,073<br>(667-1,406)        | 1,161<br>(774-1,522)         |
| Suboptimal breastfeeding                     | 0<br>(0-0)                | 0<br>(0-0)                | 0<br>(0-0)                | 0<br>(0-0)                | 0<br>(0-0)                  | 0<br>(0-0)                  | 0<br>(0-0)                   |
| Non-exclusive breastfeeding                  | 0<br>(0-0)                | 0<br>(0-0)                | 0<br>(0-0)                | 0<br>(0-0)                | 0<br>(0-0)                  | 0<br>(0-0)                  | 0<br>(0-0)                   |
| Discontinued breastfeeding                   | 0<br>(0-0)                | 0<br>(0-0)                | 0<br>(0-0)                | 0<br>(0-0)                | 0<br>(0-0)                  | 0<br>(0-0)                  | 0<br>(0-0)                   |
| Childhood underweight                        | 0<br>(0-0)                | 0<br>(0-0)                | 0<br>(0-0)                | 0<br>(0-0)                | 0<br>(0-0)                  | 0<br>(0-0)                  | 0<br>(0-0)                   |
| Iron deficiency                              | 1,243<br>(845-1,652)      | 1,352<br>(917-1,821)      | 1,166<br>(860-1,510)      | 1,139<br>(769-1,505)      | 1,148<br>(738-1,490)        | 1,073<br>(667-1,406)        | 1,161<br>(774-1,522)         |
| Vitamin A deficiency                         | 0<br>(0-0)                | 0<br>(0-0)                | 0<br>(0-0)                | 0<br>(0-0)                | 0<br>(0-0)                  | 0<br>(0-0)                  | 0<br>(0-0)                   |
| Zinc deficiency                              | 0<br>(0-0)                | 0<br>(0-0)                | 0<br>(0-0)                | 0<br>(0-0)                | 0<br>(0-0)                  | 0<br>(0-0)                  | 0<br>(0-0)                   |
| Tobacco smoking, including second-hand smoke | 0<br>(0-0)                | 0<br>(0-0)                | 1,265<br>(839-1,709)      | 36,271<br>(27,546-47,419) | 62,748<br>(42,025-85,277)   | 111,180<br>(85,751-138,882) | 160,435<br>(136,812-187,900) |
| Tobacco smoking                              | 0<br>(0-0)                | 0<br>(0-0)                | 0<br>(0-0)                | 34,462<br>(25,731-45,391) | 61,129<br>(40,332-83,748)   | 108,494<br>(83,011-136,545) | 156,449<br>(132,719-184,235) |
| Second-hand smoke                            | 0<br>(0-0)                | 0<br>(0-0)                | 1,265<br>(839-1,709)      | 1,809<br>(1,221-2,419)    | 1,618<br>(1,055-2,353)      | 2,686<br>(1,788-3,712)      | 3,987<br>(2,680-5,343)       |
| Alcohol and drug use                         | 35,470<br>(29,507-42,424) | 57,296<br>(47,868-68,143) | 63,154<br>(53,825-75,698) | 69,207<br>(59,397-80,679) | 101,996<br>(89,050-118,471) | 102,717<br>(90,843-117,296) | 108,288<br>(95,696-122,455)  |
| Alcohol use                                  | 34,082<br>(28,058-40,983) | 52,709<br>(43,429-63,049) | 57,223<br>(48,001-68,639) | 63,469<br>(53,748-73,921) | 97,088<br>(83,850-113,128)  | 98,985<br>(86,746-112,953)  | 105,386<br>(92,918-119,234)  |
| Drug use                                     | 1,523<br>(862-2,739)      | 5,141<br>(2,929-8,823)    | 6,584<br>(4,188-11,550)   | 6,284<br>(4,085-11,391)   | 5,562<br>(3,739-10,069)     | 4,316<br>(2,958-7,787)      | 3,538<br>(2,495-5,620)       |

**Web table 2: Global deaths attributable to risk factors by age and sex in 1990**

| Risk                                          | Males,<br>15-19 Years     | Males,<br>20-24 Years     | Males,<br>25-29 Years     | Males,<br>30-34 Years     | Males,<br>35-39 Years     | Males,<br>40-44 Years        | Males,<br>45-49 Years        |
|-----------------------------------------------|---------------------------|---------------------------|---------------------------|---------------------------|---------------------------|------------------------------|------------------------------|
| Physiological risk factors                    |                           |                           |                           |                           |                           |                              |                              |
| High fasting plasma glucose                   | 0<br>(0-0)                | 0<br>(0-0)                | 7,404<br>(5,625-9,290)    | 10,010<br>(7,791-12,508)  | 20,648<br>(16,478-25,031) | 26,635<br>(20,914-32,221)    | 49,303<br>(39,573-58,624)    |
| High total cholesterol                        | 0<br>(0-0)                | 0<br>(0-0)                | 4,963<br>(3,526-6,572)    | 8,824<br>(6,405-11,582)   | 19,849<br>(15,862-24,196) | 30,699<br>(24,309-37,741)    | 44,786<br>(35,883-54,025)    |
| High blood pressure                           | 0<br>(0-0)                | 0<br>(0-0)                | 18,648<br>(14,352-22,976) | 26,963<br>(21,099-32,491) | 48,594<br>(40,575-57,175) | 68,851<br>(57,714-80,769)    | 116,812<br>(102,243-132,678) |
| High body-mass index                          | 0<br>(0-0)                | 0<br>(0-0)                | 6,685<br>(4,618-9,043)    | 9,849<br>(6,858-13,066)   | 19,445<br>(14,731-24,319) | 29,384<br>(22,276-36,538)    | 40,906<br>(31,883-49,947)    |
| Low bone mineral density                      | 0<br>(0-0)                | 0<br>(0-0)                | 0<br>(0-0)                | 0<br>(0-0)                | 0<br>(0-0)                | 0<br>(0-0)                   | 0<br>(0-0)                   |
| Dietary risk factors and physical inactivity  |                           |                           |                           |                           |                           |                              |                              |
| Diet low in fruits                            | 0<br>(0-0)                | 0<br>(0-0)                | 29,442<br>(25,914-32,806) | 47,640<br>(42,173-52,624) | 76,024<br>(68,761-84,751) | 117,475<br>(106,362-129,907) | 171,815<br>(154,500-190,804) |
| Diet low in vegetables                        | 0<br>(0-0)                | 0<br>(0-0)                | 17,284<br>(13,364-21,078) | 26,874<br>(20,815-32,570) | 41,898<br>(32,240-50,879) | 63,807<br>(49,105-78,391)    | 93,203<br>(70,983-114,021)   |
| Diet low in whole grains                      | 0<br>(0-0)                | 0<br>(0-0)                | 8,672<br>(5,392-11,704)   | 12,960<br>(8,554-17,352)  | 18,902<br>(12,161-25,515) | 27,223<br>(17,737-36,343)    | 37,550<br>(24,051-50,874)    |
| Diet low in nuts and seeds                    | 0<br>(0-0)                | 0<br>(0-0)                | 7,250<br>(5,601-8,868)    | 11,277<br>(8,721-13,913)  | 16,890<br>(12,932-20,844) | 24,363<br>(18,459-30,185)    | 32,375<br>(25,014-39,686)    |
| Diet low in milk                              | 0<br>(0-0)                | 0<br>(0-0)                | 9,362<br>(6,335-11,797)   | 15,516<br>(10,254-19,451) | 23,906<br>(15,918-30,311) | 35,659<br>(23,584-45,744)    | 47,703<br>(31,583-60,507)    |
| Diet high in red meat                         | 0<br>(0-0)                | 0<br>(0-0)                | 357<br>(102-599)          | 582<br>(171-1,013)        | 812<br>(242-1,346)        | 1,045<br>(306-1,733)         | 1,512<br>(451-2,508)         |
| Diet high in processed meat                   | 0<br>(0-0)                | 0<br>(0-0)                | 97<br>(26-169)            | 173<br>(46-306)           | 259<br>(71-454)           | 355<br>(102-618)             | 523<br>(145-902)             |
| Diet high in sugar-sweetened beverages        | 0<br>(0-0)                | 0<br>(0-0)                | 3,241<br>(710-5,731)      | 5,964<br>(1,254-10,929)   | 9,643<br>(2,032-16,939)   | 15,019<br>(3,128-26,744)     | 19,804<br>(4,066-34,674)     |
| Diet low in fibre                             | 0<br>(0-0)                | 0<br>(0-0)                | 1,467<br>(960-2,108)      | 1,914<br>(1,340-2,604)    | 2,588<br>(975-4,069)      | 3,452<br>(1,212-5,276)       | 4,462<br>(1,585-6,665)       |
| Diet low in calcium                           | 0<br>(0-0)                | 0<br>(0-0)                | 4,268<br>(1,988-6,576)    | 6,728<br>(3,076-10,392)   | 10,110<br>(4,619-15,668)  | 14,045<br>(6,173-21,681)     | 17,936<br>(7,793-28,188)     |
| Diet low in seafood omega-3 fatty acids       | 0<br>(0-0)                | 0<br>(0-0)                | 464<br>(285-613)          | 751<br>(449-991)          | 1,030<br>(662-1,340)      | 1,288<br>(898-1,638)         | 1,826<br>(1,313-2,298)       |
| Diet low in polyunsaturated fatty acids       | 0<br>(0-0)                | 0<br>(0-0)                | 6,137<br>(4,406-7,737)    | 10,070<br>(7,217-12,711)  | 15,254<br>(11,065-19,180) | 22,483<br>(16,510-28,906)    | 29,534<br>(21,121-37,667)    |
| Diet high in trans fatty acids                | 0<br>(0-0)                | 0<br>(0-0)                | 2,749<br>(1,274-4,152)    | 4,366<br>(2,100-6,598)    | 6,610<br>(3,080-9,947)    | 9,600<br>(4,479-14,682)      | 12,583<br>(5,954-19,405)     |
| Diet high in sodium                           | 0<br>(0-0)                | 0<br>(0-0)                | 1,962<br>(1,381-2,550)    | 3,219<br>(2,261-4,161)    | 5,006<br>(3,521-6,530)    | 7,731<br>(5,566-9,983)       | 10,468<br>(7,388-13,528)     |
| Physical inactivity and low physical activity | 0<br>(0-0)                | 0<br>(0-0)                | 5,489<br>(2,486-8,741)    | 10,112<br>(5,755-14,723)  | 17,655<br>(10,863-24,548) | 28,842<br>(18,746-38,952)    | 44,088<br>(29,236-58,540)    |
| Occupational risk factors                     | 40,307<br>(30,293-52,619) | 60,200<br>(45,146-76,640) | 60,962<br>(46,666-78,665) | 55,798<br>(43,168-70,498) | 52,934<br>(40,514-67,761) | 44,457<br>(34,925-57,206)    | 43,642<br>(34,994-55,273)    |
| Occupational carcinogens                      | 129<br>(84-185)           | 191<br>(124-278)          | 252<br>(163-364)          | 329<br>(220-469)          | 663<br>(435-954)          | 1,180<br>(766-1,685)         | 2,494<br>(1,632-3,652)       |

**Web table 2: Global deaths attributable to risk factors by age and sex in 1990**

| Risk                                                      | Males,<br>15-19 Years     | Males,<br>20-24 Years     | Males,<br>25-29 Years     | Males,<br>30-34 Years     | Males,<br>35-39 Years     | Males,<br>40-44 Years     | Males,<br>45-49 Years     |
|-----------------------------------------------------------|---------------------------|---------------------------|---------------------------|---------------------------|---------------------------|---------------------------|---------------------------|
| Occupational exposure to asbestos                         | 65<br>(37-112)            | 72<br>(41-119)            | 70<br>(41-114)            | 92<br>(54-149)            | 152<br>(91-235)           | 296<br>(179-461)          | 528<br>(328-807)          |
| Occupational exposure to arsenic                          | 0<br>(0-0)                | 0<br>(0-0)                | 2<br>(1-4)                | 4<br>(1-8)                | 14<br>(5-26)              | 25<br>(9-46)              | 59<br>(23-113)            |
| Occupational exposure to benzene                          | 53<br>(22-95)             | 97<br>(39-175)            | 91<br>(38-167)            | 85<br>(35-151)            | 51<br>(21-92)             | 50<br>(20-88)             | 29<br>(12-52)             |
| Occupational exposure to beryllium                        | 0<br>(0-0)                | 0<br>(0-0)                | 0<br>(0-0)                | 0<br>(0-0)                | 1<br>(0-1)                | 1<br>(0-2)                | 3<br>(1-5)                |
| Occupational exposure to cadmium                          | 0<br>(0-0)                | 0<br>(0-0)                | 0<br>(0-1)                | 1<br>(0-1)                | 2<br>(1-4)                | 8<br>(2-8)                | 15<br>(5-18)              |
| Occupational exposure to chromium                         | 0<br>(0-0)                | 0<br>(0-0)                | 1<br>(1-2)                | 2<br>(1-4)                | 8<br>(5-13)               | 15<br>(9-24)              | 37<br>(22-57)             |
| Occupational exposure to diesel engine exhaust            | 0<br>(0-0)                | 0<br>(0-0)                | 21<br>(11-34)             | 38<br>(20-62)             | 132<br>(72-211)           | 236<br>(127-372)          | 565<br>(315-895)          |
| Occupational exposure to second-hand smoke                | 0<br>(0-0)                | 0<br>(0-0)                | 19<br>(11-28)             | 36<br>(21-51)             | 121<br>(76-175)           | 220<br>(136-321)          | 526<br>(344-752)          |
| Occupational exposure to formaldehyde                     | 11<br>(5-19)              | 23<br>(10-38)             | 23<br>(10-40)             | 24<br>(10-44)             | 19<br>(7-39)              | 22<br>(7-48)              | 16<br>(4-36)              |
| Occupational exposure to nickel                           | 0<br>(0-0)                | 0<br>(0-0)                | 6<br>(2-14)               | 12<br>(3-26)              | 41<br>(11-87)             | 76<br>(19-157)            | 182<br>(48-383)           |
| Occupational exposure to polycyclic aromatic hydrocarbons | 0<br>(0-0)                | 0<br>(0-0)                | 3<br>(1-5)                | 5<br>(2-10)               | 19<br>(9-32)              | 35<br>(16-58)             | 83<br>(39-139)            |
| Occupational exposure to silica                           | 0<br>(0-0)                | 0<br>(0-0)                | 14<br>(8-22)              | 27<br>(16-41)             | 94<br>(58-143)            | 167<br>(99-249)           | 400<br>(255-588)          |
| Occupational exposure to sulfuric acid                    | 0<br>(0-0)                | 0<br>(0-0)                | 2<br>(0-4)                | 5<br>(1-11)               | 21<br>(5-47)              | 56<br>(14-124)            | 126<br>(32-294)           |
| Occupational asthmagens                                   | 421<br>(178-852)          | 743<br>(324-1,426)        | 954<br>(448-1,840)        | 965<br>(480-1,907)        | 1,363<br>(631-2,860)      | 1,491<br>(706-2,932)      | 2,252<br>(1,008-5,033)    |
| Occupational particulate matter, gases, and fumes         | 0<br>(0-0)                | 0<br>(0-0)                | 1,172<br>(502-2,000)      | 1,658<br>(733-2,657)      | 3,013<br>(1,413-4,842)    | 4,605<br>(2,092-7,190)    | 7,940<br>(3,736-12,288)   |
| Occupational noise                                        | 0<br>(0-0)                |
| Occupational risk factors for injuries                    | 39,757<br>(29,804-51,975) | 59,266<br>(44,468-75,636) | 58,584<br>(44,395-75,897) | 52,845<br>(40,589-67,529) | 47,895<br>(35,577-62,558) | 37,181<br>(27,963-49,388) | 30,956<br>(23,164-40,659) |
| Occupational low back pain                                | 0<br>(0-0)                |
| Sexual abuse and violence                                 |                           |                           |                           |                           |                           |                           |                           |
| Childhood sexual abuse                                    |                           |                           |                           |                           |                           |                           |                           |
| Intimate partner violence                                 |                           |                           |                           |                           |                           |                           |                           |

**Web table 2: Global deaths attributable to risk factors by age and sex in 1990**

| Risk                                         | Males,<br>50-54 Years        | Males,<br>55-59 Years        | Males,<br>60-64 Years        | Males,<br>65-69 Years        | Males,<br>70-74 Years        | Males,<br>75-79 Years        | Males,<br>80+ Years          |
|----------------------------------------------|------------------------------|------------------------------|------------------------------|------------------------------|------------------------------|------------------------------|------------------------------|
| Unimproved water and sanitation              | 6,214<br>(286-11,946)        | 6,572<br>(336-12,769)        | 8,135<br>(370-17,085)        | 7,839<br>(400-15,514)        | 7,415<br>(346-14,236)        | 6,351<br>(293-12,659)        | 10,178<br>(508-20,309)       |
| Unimproved water source                      | 2,370<br>(159-4,780)         | 2,491<br>(167-5,207)         | 3,076<br>(187-6,567)         | 2,975<br>(198-6,112)         | 2,829<br>(180-5,732)         | 2,409<br>(166-4,923)         | 3,626<br>(248-7,711)         |
| Unimproved sanitation                        | 4,419<br>(121-8,960)         | 4,685<br>(141-9,505)         | 5,808<br>(181-13,061)        | 5,585<br>(175-11,489)        | 5,266<br>(149-10,580)        | 4,515<br>(130-9,238)         | 7,411<br>(234-15,448)        |
| Air pollution                                |                              |                              |                              |                              |                              |                              |                              |
| Ambient particulate matter pollution         | 99,937<br>(75,297-126,450)   | 136,051<br>(101,994-171,724) | 186,556<br>(139,856-229,225) | 196,182<br>(141,476-248,946) | 192,016<br>(137,661-243,917) | 184,008<br>(131,875-230,463) | 228,941<br>(165,496-288,332) |
| Household air pollution from solid fuels     | 116,653<br>(83,145-152,563)  | 160,393<br>(108,795-209,306) | 222,922<br>(149,166-294,060) | 242,617<br>(152,788-325,290) | 252,249<br>(155,413-334,708) | 219,362<br>(131,831-294,827) | 247,036<br>(147,023-335,976) |
| Ambient ozone pollution                      | 3,046<br>(987-5,422)         | 5,061<br>(1,646-8,830)       | 8,875<br>(2,919-15,804)      | 11,630<br>(3,794-20,579)     | 13,621<br>(4,459-24,203)     | 13,614<br>(4,510-23,920)     | 18,071<br>(5,999-31,593)     |
| Other environmental risks                    | 9,806<br>(8,066-11,908)      | 12,732<br>(10,607-15,535)    | 16,741<br>(13,892-20,468)    | 16,926<br>(14,100-20,673)    | 14,246<br>(11,883-17,357)    | 11,714<br>(9,847-14,116)     | 10,670<br>(8,894-12,760)     |
| Residential radon                            |                              |                              |                              |                              |                              |                              |                              |
| Lead exposure                                | 9,806<br>(8,066-11,908)      | 12,732<br>(10,607-15,535)    | 16,741<br>(13,892-20,468)    | 16,926<br>(14,100-20,673)    | 14,246<br>(11,883-17,357)    | 11,714<br>(9,847-14,116)     | 10,670<br>(8,894-12,760)     |
| Child and maternal undernutrition            | 1,081<br>(749-1,403)         | 1,238<br>(919-1,559)         | 1,600<br>(1,194-2,091)       | 1,816<br>(1,348-2,392)       | 1,920<br>(1,441-2,429)       | 2,035<br>(1,536-2,499)       | 4,235<br>(3,299-5,271)       |
| Suboptimal breastfeeding                     | 0<br>(0-0)                   |
| Non-exclusive breastfeeding                  | 0<br>(0-0)                   |
| Discontinued breastfeeding                   | 0<br>(0-0)                   |
| Childhood underweight                        | 0<br>(0-0)                   |
| Iron deficiency                              | 1,081<br>(749-1,403)         | 1,238<br>(919-1,559)         | 1,600<br>(1,194-2,091)       | 1,816<br>(1,348-2,392)       | 1,920<br>(1,441-2,429)       | 2,035<br>(1,536-2,499)       | 4,235<br>(3,299-5,271)       |
| Vitamin A deficiency                         | 0<br>(0-0)                   |
| Zinc deficiency                              | 0<br>(0-0)                   |
| Tobacco smoking, including second-hand smoke | 277,125<br>(232,922-318,552) | 388,167<br>(328,035-445,166) | 536,986<br>(460,359-613,815) | 549,201<br>(468,215-641,893) | 478,248<br>(405,734-572,272) | 432,711<br>(372,008-523,056) | 451,492<br>(393,313-525,013) |
| Tobacco smoking                              | 269,596<br>(224,472-312,670) | 376,926<br>(317,488-436,497) | 519,882<br>(442,873-594,782) | 528,484<br>(447,366-624,005) | 455,519<br>(380,908-552,986) | 406,900<br>(343,098-499,259) | 414,350<br>(357,564-491,339) |
| Second-hand smoke                            | 7,529<br>(5,241-10,033)      | 11,241<br>(7,764-14,882)     | 17,103<br>(11,787-22,525)    | 20,716<br>(14,289-26,901)    | 22,729<br>(15,543-29,701)    | 25,811<br>(17,635-33,397)    | 37,142<br>(25,310-47,846)    |
| Alcohol and drug use                         | 138,348<br>(123,518-155,388) | 147,441<br>(131,100-166,553) | 160,181<br>(141,692-181,520) | 100,426<br>(84,935-116,197)  | 84,322<br>(68,458-100,733)   | 77,600<br>(62,304-93,185)    | 90,706<br>(68,061-114,419)   |
| Alcohol use                                  | 135,718<br>(120,880-152,546) | 145,031<br>(129,008-163,825) | 157,806<br>(139,455-178,629) | 100,026<br>(84,559-115,818)  | 84,020<br>(68,167-100,508)   | 77,307<br>(61,950-92,940)    | 90,363<br>(67,827-114,062)   |

**Web table 2: Global deaths attributable to risk factors by age and sex in 1990**

| Risk                                          | Males,<br>50-54 Years        | Males,<br>55-59 Years        | Males,<br>60-64 Years        | Males,<br>65-69 Years        | Males,<br>70-74 Years        | Males,<br>75-79 Years        | Males,<br>80+ Years          |
|-----------------------------------------------|------------------------------|------------------------------|------------------------------|------------------------------|------------------------------|------------------------------|------------------------------|
| Drug use                                      | 3,468<br>(2,526–5,713)       | 3,459<br>(2,674–4,702)       | 3,581<br>(2,778–4,839)       | 407<br>(190–960)             | 305<br>(137–711)             | 295<br>(125–875)             | 344<br>(155–870)             |
| Physiological risk factors                    |                              |                              |                              |                              |                              |                              |                              |
| High fasting plasma glucose                   | 76,110<br>(61,718–91,873)    | 115,091<br>(94,688–136,651)  | 148,913<br>(121,472–178,406) | 154,279<br>(127,248–182,513) | 143,579<br>(118,474–171,278) | 138,274<br>(114,284–164,684) | 161,155<br>(131,926–193,450) |
| High total cholesterol                        | 76,365<br>(62,094–91,013)    | 96,789<br>(78,201–116,387)   | 136,794<br>(112,406–163,763) | 135,638<br>(110,602–164,592) | 120,450<br>(95,255–146,208)  | 120,269<br>(91,621–150,975)  | 141,323<br>(113,457–171,240) |
| High blood pressure                           | 193,559<br>(169,277–219,905) | 303,063<br>(272,492–338,128) | 414,702<br>(373,579–463,591) | 492,514<br>(449,731–546,185) | 482,462<br>(437,583–537,752) | 531,077<br>(483,116–581,837) | 715,344<br>(651,074–786,047) |
| High body-mass index                          | 68,427<br>(53,629–83,476)    | 87,941<br>(69,472–106,312)   | 123,860<br>(98,667–149,267)  | 123,432<br>(97,891–149,077)  | 113,801<br>(89,473–138,922)  | 117,374<br>(92,199–142,611)  | 145,942<br>(112,418–179,611) |
| Low bone mineral density                      | 4,454<br>(3,302–6,423)       | 4,473<br>(3,413–6,685)       | 6,489<br>(5,061–9,164)       | 6,269<br>(4,837–9,075)       | 7,065<br>(5,341–10,279)      | 7,926<br>(5,820–10,641)      | 16,140<br>(12,905–21,320)    |
| Dietary risk factors and physical inactivity  | 301,622<br>(272,961–330,840) | 412,916<br>(372,739–456,512) | 569,189<br>(514,956–627,045) | 618,981<br>(564,074–680,883) | 603,280<br>(536,517–668,078) | 621,668<br>(561,321–677,373) | 817,166<br>(735,617–899,523) |
| Diet low in fruits                            | 161,554<br>(126,237–196,989) | 217,641<br>(168,649–263,912) | 279,169<br>(214,716–340,216) | 290,751<br>(227,942–353,986) | 274,123<br>(203,954–340,175) | 257,608<br>(191,662–316,508) | 289,503<br>(216,638–365,241) |
| Diet low in vegetables                        | 62,086<br>(40,722–83,808)    | 78,937<br>(51,127–108,509)   | 103,856<br>(70,607–138,638)  | 106,317<br>(72,267–142,155)  | 99,827<br>(66,904–137,130)   | 100,878<br>(67,820–135,679)  | 122,541<br>(81,657–164,989)  |
| Diet low in whole grains                      | 53,605<br>(41,649–65,087)    | 67,710<br>(52,163–82,264)    | 88,344<br>(68,947–107,913)   | 88,560<br>(68,240–108,554)   | 82,748<br>(63,926–101,816)   | 81,129<br>(62,808–98,233)    | 95,425<br>(73,862–116,107)   |
| Diet low in nuts and seeds                    | 80,089<br>(53,058–102,549)   | 100,555<br>(65,763–129,796)  | 136,085<br>(86,887–174,945)  | 142,237<br>(90,838–184,758)  | 130,536<br>(80,829–173,074)  | 136,856<br>(84,827–181,042)  | 183,221<br>(110,636–246,285) |
| Diet low in milk                              | 2,441<br>(738–4,125)         | 3,513<br>(1,058–5,892)       | 4,722<br>(1,406–7,959)       | 5,172<br>(1,569–8,689)       | 4,771<br>(1,425–8,120)       | 4,749<br>(1,421–8,008)       | 5,163<br>(1,530–8,696)       |
| Diet high in red meat                         | 904<br>(248–1,578)           | 1,329<br>(374–2,281)         | 1,896<br>(523–3,288)         | 2,074<br>(570–3,520)         | 1,910<br>(551–3,255)         | 2,038<br>(560–3,526)         | 2,329<br>(641–3,995)         |
| Diet high in processed meat                   | 32,025<br>(6,684–56,192)     | 39,236<br>(8,484–68,196)     | 52,336<br>(11,357–93,159)    | 53,431<br>(11,587–93,453)    | 46,928<br>(10,304–82,732)    | 51,345<br>(11,072–89,522)    | 68,227<br>(14,042–120,678)   |
| Diet high in sugar-sweetened beverages        | 6,706<br>(2,253–10,256)      | 7,951<br>(4,710–12,410)      | 10,150<br>(6,001–16,098)     | 10,332<br>(5,801–16,218)     | 10,107<br>(5,082–17,054)     | 9,323<br>(4,392–14,099)      | 12,422<br>(5,410–16,456)     |
| Diet low in fibre                             | 28,300<br>(12,438–44,541)    | 33,932<br>(15,163–53,317)    | 42,898<br>(18,957–67,641)    | 42,847<br>(19,263–67,051)    | 40,001<br>(17,974–62,924)    | 40,608<br>(18,078–63,965)    | 51,930<br>(22,897–82,004)    |
| Diet low in calcium                           | 2,929<br>(2,093–3,725)       | 4,286<br>(3,073–5,446)       | 5,904<br>(4,216–7,762)       | 6,794<br>(4,546–9,070)       | 6,762<br>(4,508–9,208)       | 7,326<br>(4,556–10,316)      | 9,616<br>(5,368–14,588)      |
| Diet low in seafood omega-3 fatty acids       | 48,499<br>(34,641–62,537)    | 59,015<br>(42,693–75,800)    | 77,771<br>(56,315–99,795)    | 78,568<br>(56,770–101,051)   | 69,841<br>(50,677–90,067)    | 70,575<br>(50,674–90,707)    | 88,898<br>(63,097–115,124)   |
| Diet low in polyunsaturated fatty acids       | 20,427<br>(9,662–31,136)     | 25,100<br>(11,851–38,830)    | 32,997<br>(15,409–50,687)    | 33,565<br>(15,975–51,699)    | 30,126<br>(14,261–46,521)    | 30,946<br>(14,634–47,895)    | 39,608<br>(18,571–61,654)    |
| Diet high in trans fatty acids                | 16,040<br>(11,218–20,838)    | 20,191<br>(14,531–26,268)    | 26,346<br>(18,735–34,141)    | 28,404<br>(20,071–36,880)    | 25,972<br>(18,434–33,780)    | 25,071<br>(17,925–32,615)    | 32,315<br>(22,868–41,828)    |
| Diet high in sodium                           | 80,166<br>(53,077–106,023)   | 114,794<br>(76,259–152,811)  | 163,591<br>(106,039–216,120) | 182,876<br>(118,404–244,772) | 175,205<br>(113,429–234,245) | 170,135<br>(108,845–228,089) | 204,761<br>(128,510–280,031) |
| Physical inactivity and low physical activity |                              |                              |                              |                              |                              |                              |                              |



**Web table 2: Global deaths attributable to risk factors by age and sex in 1990**

| Risk                                                      | Males,<br>50-54 Years     | Males,<br>55-59 Years     | Males,<br>60-64 Years     | Males,<br>65-69 Years     | Males,<br>70-74 Years     | Males,<br>75-79 Years     | Males,<br>80+ Years    |
|-----------------------------------------------------------|---------------------------|---------------------------|---------------------------|---------------------------|---------------------------|---------------------------|------------------------|
| Occupational risk factors                                 | 52,540<br>(40,846–65,663) | 60,494<br>(43,444–77,118) | 67,463<br>(43,366–91,471) | 50,853<br>(30,678–72,388) | 54,021<br>(31,316–79,229) | 45,761<br>(24,882–67,915) | 4,969<br>(3,563–7,191) |
| Occupational carcinogens                                  | 4,696<br>(2,940–7,018)    | 8,047<br>(5,130–11,701)   | 10,868<br>(7,096–16,020)  | 8,869<br>(6,022–12,633)   | 7,574<br>(5,090–11,447)   | 5,044<br>(3,616–7,443)    | 4,969<br>(3,563–7,191) |
| Occupational exposure to asbestos                         | 935<br>(589–1,418)        | 1,538<br>(969–2,419)      | 2,343<br>(1,513–3,685)    | 2,959<br>(1,899–4,554)    | 2,596<br>(1,706–4,104)    | 2,624<br>(1,716–4,112)    | 2,753<br>(1,781–4,400) |
| Occupational exposure to arsenic                          | 114<br>(43–220)           | 204<br>(77–392)           | 267<br>(101–504)          | 179<br>(68–348)           | 152<br>(58–300)           | 70<br>(26–138)            | 65<br>(24–128)         |
| Occupational exposure to benzene                          | 37<br>(15–67)             | 53<br>(22–95)             | 66<br>(28–117)            | 97<br>(41–173)            | 89<br>(37–159)            | 114<br>(48–203)           | 82<br>(34–149)         |
| Occupational exposure to beryllium                        | 6<br>(2–11)               | 11<br>(4–19)              | 14<br>(6–25)              | 10<br>(4–17)              | 8<br>(3–15)               | 4<br>(1–7)                | 4<br>(1–6)             |
| Occupational exposure to cadmium                          | 21<br>(10–36)             | 38<br>(17–64)             | 50<br>(22–85)             | 33<br>(15–57)             | 28<br>(13–49)             | 13<br>(6–24)              | 12<br>(6–22)           |
| Occupational exposure to chromium                         | 72<br>(41–111)            | 128<br>(74–197)           | 169<br>(99–262)           | 114<br>(66–176)           | 95<br>(56–154)            | 44<br>(26–76)             | 42<br>(25–70)          |
| Occupational exposure to diesel engine exhaust            | 1,090<br>(603–1,732)      | 1,929<br>(1,068–2,998)    | 2,527<br>(1,434–3,971)    | 1,710<br>(953–2,720)      | 1,446<br>(816–2,369)      | 668<br>(373–1,162)        | 617<br>(353–1,046)     |
| Occupational exposure to second-hand smoke                | 1,002<br>(628–1,459)      | 1,781<br>(1,162–2,532)    | 2,338<br>(1,572–3,400)    | 1,584<br>(1,054–2,372)    | 1,336<br>(905–2,045)      | 622<br>(435–976)          | 586<br>(402–911)       |
| Occupational exposure to formaldehyde                     | 17<br>(5–37)              | 23<br>(7–52)              | 24<br>(8–53)              | 31<br>(11–63)             | 25<br>(9–50)              | 27<br>(10–53)             | 15<br>(6–27)           |
| Occupational exposure to nickel                           | 354<br>(91–758)           | 629<br>(162–1,340)        | 829<br>(217–1,737)        | 558<br>(143–1,182)        | 469<br>(124–1,013)        | 218<br>(56–474)           | 205<br>(53–446)        |
| Occupational exposure to polycyclic aromatic hydrocarbons | 162<br>(77–270)           | 287<br>(134–486)          | 379<br>(179–647)          | 255<br>(120–430)          | 215<br>(100–371)          | 100<br>(47–181)           | 95<br>(44–165)         |
| Occupational exposure to silica                           | 775<br>(478–1,139)        | 1,379<br>(869–2,010)      | 1,811<br>(1,180–2,630)    | 1,227<br>(792–1,881)      | 1,043<br>(679–1,630)      | 483<br>(323–794)          | 450<br>(303–728)       |
| Occupational exposure to sulfuric acid                    | 245<br>(66–549)           | 332<br>(93–741)           | 421<br>(115–914)          | 299<br>(75–682)           | 231<br>(60–523)           | 113<br>(30–255)           | 114<br>(31–261)        |
| Occupational asthmagens                                   | 3,256<br>(1,435–6,863)    | 4,151<br>(1,955–8,509)    | 4,854<br>(2,174–10,049)   | 3,837<br>(1,752–7,797)    | 3,971<br>(1,887–7,579)    | 3,409<br>(1,623–6,763)    | 0<br>(0–0)             |
| Occupational particulate matter, gases, and fumes         | 17,024<br>(7,973–25,713)  | 26,609<br>(11,847–40,956) | 38,336<br>(17,066–59,385) | 32,280<br>(13,904–51,912) | 38,589<br>(16,673–61,951) | 36,141<br>(16,051–57,616) | 0<br>(0–0)             |
| Occupational noise                                        | 0<br>(0–0)                | 0<br>(0–0)                | 0<br>(0–0)                | 0<br>(0–0)                | 0<br>(0–0)                | 0<br>(0–0)                | 0<br>(0–0)             |
| Occupational risk factors for injuries                    | 27,564<br>(20,724–35,967) | 21,687<br>(16,247–28,409) | 13,405<br>(10,019–17,476) | 5,867<br>(4,304–7,898)    | 3,888<br>(2,880–5,234)    | 1,167<br>(877–1,524)      | 0<br>(0–0)             |
| Occupational low back pain                                | 0<br>(0–0)                | 0<br>(0–0)                | 0<br>(0–0)                | 0<br>(0–0)                | 0<br>(0–0)                | 0<br>(0–0)                | 0<br>(0–0)             |
| Sexual abuse and violence                                 |                           |                           |                           |                           |                           |                           |                        |
| Childhood sexual abuse                                    |                           |                           |                           |                           |                           |                           |                        |
| Intimate partner violence                                 |                           |                           |                           |                           |                           |                           |                        |

**Web table 2: Global deaths attributable to risk factors by age and sex in 1990**

| Risk                                         | Females,<br>All Ages               | Females,<br>0-6 Days      | Females,<br>7-27 Days       | Females,<br>28-364 Days      | Females,<br>1-4 Years        | Females,<br>5-9 Years  | Females,<br>10-14 Years |
|----------------------------------------------|------------------------------------|---------------------------|-----------------------------|------------------------------|------------------------------|------------------------|-------------------------|
| Unimproved water and sanitation              | 350,629<br>(17,531–638,433)        | 8,057<br>(335–15,998)     | 19,175<br>(934–36,034)      | 102,992<br>(5,095–189,089)   | 95,905<br>(5,086–174,184)    | 13,793<br>(599–26,036) | 6,416<br>(259–12,427)   |
| Unimproved water source                      | 140,150<br>(10,042–271,546)        | 3,122<br>(199–6,746)      | 7,558<br>(508–14,892)       | 41,425<br>(2,911–81,169)     | 39,333<br>(2,933–77,518)     | 5,295<br>(353–10,822)  | 2,538<br>(159–5,384)    |
| Unimproved sanitation                        | 244,207<br>(7,348–460,913)         | 5,697<br>(151–11,753)     | 13,428<br>(420–26,348)      | 71,310<br>(2,110–137,329)    | 66,144<br>(2,065–125,840)    | 9,771<br>(267–19,021)  | 4,483<br>(103–8,975)    |
| Air pollution                                |                                    |                           |                             |                              |                              |                        |                         |
| Ambient particulate matter pollution         | 1,360,712<br>(1,166,992–1,559,747) | 13,929<br>(8,927–19,586)  | 15,163<br>(10,123–20,296)   | 64,977<br>(43,926–86,585)    | 45,385<br>(30,810–60,136)    | 0<br>(0–0)             | 0<br>(0–0)              |
| Household air pollution from solid fuels     | 2,221,558<br>(1,862,975–2,581,337) | 48,208<br>(33,065–63,885) | 53,049<br>(37,321–67,156)   | 223,654<br>(162,223–280,860) | 162,385<br>(118,948–205,548) | 0<br>(0–0)             | 0<br>(0–0)              |
| Ambient ozone pollution                      | 66,274<br>(22,424–116,663)         | 0<br>(0–0)                | 0<br>(0–0)                  | 0<br>(0–0)                   | 0<br>(0–0)                   | 0<br>(0–0)             | 0<br>(0–0)              |
| Other environmental risks                    | 100,699<br>(82,720–119,745)        | 0<br>(0–0)                | 0<br>(0–0)                  | 0<br>(0–0)                   | 0<br>(0–0)                   | 0<br>(0–0)             | 0<br>(0–0)              |
| Residential radon                            |                                    |                           |                             |                              |                              |                        |                         |
| Lead exposure                                | 100,699<br>(82,720–119,745)        | 0<br>(0–0)                | 0<br>(0–0)                  | 0<br>(0–0)                   | 0<br>(0–0)                   | 0<br>(0–0)             | 0<br>(0–0)              |
| Child and maternal undernutrition            | 1,668,365<br>(1,396,689–1,986,532) | 0<br>(0–0)                | 107,719<br>(68,987–144,127) | 763,998<br>(626,300–909,948) | 678,965<br>(539,763–857,700) | 1,126<br>(770–1,612)   | 985<br>(740–1,436)      |
| Suboptimal breastfeeding                     | 581,921<br>(370,598–814,551)       | 0<br>(0–0)                | 107,719<br>(68,987–144,127) | 429,946<br>(264,728–612,610) | 44,256<br>(4,631–95,705)     | 0<br>(0–0)             | 0<br>(0–0)              |
| Non-exclusive breastfeeding                  | 505,849<br>(302,585–720,858)       | 0<br>(0–0)                | 107,719<br>(68,987–144,127) | 398,130<br>(232,644–577,305) | 0<br>(0–0)                   | 0<br>(0–0)             | 0<br>(0–0)              |
| Discontinued breastfeeding                   | 76,073<br>(7,809–165,395)          | 0<br>(0–0)                | 0<br>(0–0)                  | 31,816<br>(3,006–72,813)     | 44,256<br>(4,631–95,705)     | 0<br>(0–0)             | 0<br>(0–0)              |
| Childhood underweight                        | 1,065,774<br>(898,859–1,299,715)   | 0<br>(0–0)                | 0<br>(0–0)                  | 519,139<br>(433,722–617,567) | 546,635<br>(444,754–679,669) | 0<br>(0–0)             | 0<br>(0–0)              |
| Iron deficiency                              | 128,675<br>(92,036–156,884)        | 0<br>(0–0)                | 0<br>(0–0)                  | 3,913<br>(2,823–5,655)       | 7,079<br>(4,809–10,276)      | 1,126<br>(770–1,612)   | 985<br>(740–1,436)      |
| Vitamin A deficiency                         | 168,203<br>(80,696–298,163)        | 0<br>(0–0)                | 0<br>(0–0)                  | 42,592<br>(19,130–73,100)    | 125,610<br>(60,020–228,871)  | 0<br>(0–0)             | 0<br>(0–0)              |
| Zinc deficiency                              | 132,071<br>(23,716–253,841)        | 0<br>(0–0)                | 0<br>(0–0)                  | 0<br>(0–0)                   | 132,071<br>(23,716–253,841)  | 0<br>(0–0)             | 0<br>(0–0)              |
| Tobacco smoking, including second-hand smoke | 1,649,238<br>(1,380,504–2,144,408) | 15,353<br>(10,426–21,273) | 17,122<br>(11,809–22,782)   | 75,745<br>(51,933–99,291)    | 50,323<br>(33,956–66,051)    | 0<br>(0–0)             | 0<br>(0–0)              |
| Tobacco smoking                              | 1,244,106<br>(961,356–1,781,819)   | 0<br>(0–0)                | 0<br>(0–0)                  | 0<br>(0–0)                   | 0<br>(0–0)                   | 0<br>(0–0)             | 0<br>(0–0)              |
| Second-hand smoke                            | 405,132<br>(310,224–500,100)       | 15,353<br>(10,426–21,273) | 17,122<br>(11,809–22,782)   | 75,745<br>(51,933–99,291)    | 50,323<br>(33,956–66,051)    | 0<br>(0–0)             | 0<br>(0–0)              |
| Alcohol and drug use                         | 702,071<br>(570,285–844,382)       | 165<br>(98–268)           | 134<br>(61–236)             | 728<br>(421–1,192)           | 2,637<br>(1,322–4,264)       | 1,209<br>(872–1,573)   | 952<br>(711–1,255)      |
| Alcohol use                                  | 682,576<br>(551,702–825,112)       | 100<br>(61–175)           | 51<br>(26–110)              | 381<br>(232–554)             | 1,698<br>(913–2,587)         | 1,024<br>(752–1,285)   | 752<br>(592–923)        |

**Web table 2: Global deaths attributable to risk factors by age and sex in 1990**

| Risk                                          | Females,<br>All Ages               | Females,<br>0-6 Days | Females,<br>7-27 Days | Females,<br>28-364 Days | Females,<br>1-4 Years | Females,<br>5-9 Years | Females,<br>10-14 Years |
|-----------------------------------------------|------------------------------------|----------------------|-----------------------|-------------------------|-----------------------|-----------------------|-------------------------|
| Drug use                                      | 21,895<br>(15,984–31,023)          | 65<br>(22–132)       | 83<br>(27–152)        | 347<br>(137–765)        | 939<br>(221–2,081)    | 185<br>(65–434)       | 200<br>(80–440)         |
| Physiological risk factors                    |                                    |                      |                       |                         |                       |                       |                         |
| High fasting plasma glucose                   | 1,052,773<br>(881,704–1,230,327)   | 0<br>(0–0)           | 0<br>(0–0)            | 0<br>(0–0)              | 0<br>(0–0)            | 0<br>(0–0)            | 0<br>(0–0)              |
| High total cholesterol                        | 1,009,172<br>(829,163–1,218,442)   | 0<br>(0–0)           | 0<br>(0–0)            | 0<br>(0–0)              | 0<br>(0–0)            | 0<br>(0–0)            | 0<br>(0–0)              |
| High blood pressure                           | 3,880,598<br>(3,559,634–4,250,099) | 0<br>(0–0)           | 0<br>(0–0)            | 0<br>(0–0)              | 0<br>(0–0)            | 0<br>(0–0)            | 0<br>(0–0)              |
| High body-mass index                          | 1,076,502<br>(878,065–1,286,482)   | 0<br>(0–0)           | 0<br>(0–0)            | 0<br>(0–0)              | 0<br>(0–0)            | 0<br>(0–0)            | 0<br>(0–0)              |
| Low bone mineral density                      | 50,455<br>(40,408–62,110)          | 0<br>(0–0)           | 0<br>(0–0)            | 0<br>(0–0)              | 0<br>(0–0)            | 0<br>(0–0)            | 0<br>(0–0)              |
| Dietary risk factors and physical inactivity  | 3,983,125<br>(3,624,593–4,360,772) | 0<br>(0–0)           | 0<br>(0–0)            | 0<br>(0–0)              | 0<br>(0–0)            | 0<br>(0–0)            | 0<br>(0–0)              |
| Diet low in fruits                            | 1,653,787<br>(1,269,335–2,006,693) | 0<br>(0–0)           | 0<br>(0–0)            | 0<br>(0–0)              | 0<br>(0–0)            | 0<br>(0–0)            | 0<br>(0–0)              |
| Diet low in vegetables                        | 674,309<br>(441,649–910,150)       | 0<br>(0–0)           | 0<br>(0–0)            | 0<br>(0–0)              | 0<br>(0–0)            | 0<br>(0–0)            | 0<br>(0–0)              |
| Diet low in whole grains                      | 580,600<br>(447,140–706,303)       | 0<br>(0–0)           | 0<br>(0–0)            | 0<br>(0–0)              | 0<br>(0–0)            | 0<br>(0–0)            | 0<br>(0–0)              |
| Diet low in nuts and seeds                    | 872,483<br>(541,757–1,147,258)     | 0<br>(0–0)           | 0<br>(0–0)            | 0<br>(0–0)              | 0<br>(0–0)            | 0<br>(0–0)            | 0<br>(0–0)              |
| Diet low in milk                              | 33,312<br>(9,745–57,799)           | 0<br>(0–0)           | 0<br>(0–0)            | 0<br>(0–0)              | 0<br>(0–0)            | 0<br>(0–0)            | 0<br>(0–0)              |
| Diet high in red meat                         | 12,551<br>(3,425–22,054)           | 0<br>(0–0)           | 0<br>(0–0)            | 0<br>(0–0)              | 0<br>(0–0)            | 0<br>(0–0)            | 0<br>(0–0)              |
| Diet high in processed meat                   | 334,476<br>(71,692–584,050)        | 0<br>(0–0)           | 0<br>(0–0)            | 0<br>(0–0)              | 0<br>(0–0)            | 0<br>(0–0)            | 0<br>(0–0)              |
| Diet high in sugar-sweetened beverages        | 60,442<br>(34,097–91,666)          | 0<br>(0–0)           | 0<br>(0–0)            | 0<br>(0–0)              | 0<br>(0–0)            | 0<br>(0–0)            | 0<br>(0–0)              |
| Diet low in fibre                             | 250,541<br>(111,867–394,088)       | 0<br>(0–0)           | 0<br>(0–0)            | 0<br>(0–0)              | 0<br>(0–0)            | 0<br>(0–0)            | 0<br>(0–0)              |
| Diet low in calcium                           | 33,330<br>(23,008–43,904)          | 0<br>(0–0)           | 0<br>(0–0)            | 0<br>(0–0)              | 0<br>(0–0)            | 0<br>(0–0)            | 0<br>(0–0)              |
| Diet low in seafood omega-3 fatty acids       | 466,440<br>(337,205–601,988)       | 0<br>(0–0)           | 0<br>(0–0)            | 0<br>(0–0)              | 0<br>(0–0)            | 0<br>(0–0)            | 0<br>(0–0)              |
| Diet low in polyunsaturated fatty acids       | 199,388<br>(95,418–305,733)        | 0<br>(0–0)           | 0<br>(0–0)            | 0<br>(0–0)              | 0<br>(0–0)            | 0<br>(0–0)            | 0<br>(0–0)              |
| Diet high in trans fatty acids                | 164,736<br>(117,395–211,588)       | 0<br>(0–0)           | 0<br>(0–0)            | 0<br>(0–0)              | 0<br>(0–0)            | 0<br>(0–0)            | 0<br>(0–0)              |
| Diet high in sodium                           | 1,047,642<br>(666,779–1,397,486)   | 0<br>(0–0)           | 0<br>(0–0)            | 0<br>(0–0)              | 0<br>(0–0)            | 0<br>(0–0)            | 0<br>(0–0)              |
| Physical inactivity and low physical activity |                                    |                      |                       |                         |                       |                       |                         |

**Web table 2: Global deaths attributable to risk factors by age and sex in 1990**

| Risk                                                      | Females,<br>All Ages        | Females,<br>0-6 Days | Females,<br>7-27 Days | Females,<br>28-364 Days | Females,<br>1-4 Years | Females,<br>5-9 Years | Females,<br>10-14 Years |
|-----------------------------------------------------------|-----------------------------|----------------------|-----------------------|-------------------------|-----------------------|-----------------------|-------------------------|
| Occupational risk factors                                 | 116,743<br>(74,642–164,679) | 0<br>(0–0)           | 0<br>(0–0)            | 0<br>(0–0)              | 0<br>(0–0)            | 0<br>(0–0)            | 0<br>(0–0)              |
| Occupational carcinogens                                  | 16,766<br>(11,866–24,842)   | 0<br>(0–0)           | 0<br>(0–0)            | 0<br>(0–0)              | 0<br>(0–0)            | 0<br>(0–0)            | 0<br>(0–0)              |
| Occupational exposure to asbestos                         | 6,033<br>(4,012–9,397)      | 0<br>(0–0)           | 0<br>(0–0)            | 0<br>(0–0)              | 0<br>(0–0)            | 0<br>(0–0)            | 0<br>(0–0)              |
| Occupational exposure to arsenic                          | 463<br>(176–915)            | 0<br>(0–0)           | 0<br>(0–0)            | 0<br>(0–0)              | 0<br>(0–0)            | 0<br>(0–0)            | 0<br>(0–0)              |
| Occupational exposure to benzene                          | 770<br>(292–1,422)          | 0<br>(0–0)           | 0<br>(0–0)            | 0<br>(0–0)              | 0<br>(0–0)            | 0<br>(0–0)            | 0<br>(0–0)              |
| Occupational exposure to beryllium                        | 26<br>(10–47)               | 0<br>(0–0)           | 0<br>(0–0)            | 0<br>(0–0)              | 0<br>(0–0)            | 0<br>(0–0)            | 0<br>(0–0)              |
| Occupational exposure to cadmium                          | 74<br>(33–130)              | 0<br>(0–0)           | 0<br>(0–0)            | 0<br>(0–0)              | 0<br>(0–0)            | 0<br>(0–0)            | 0<br>(0–0)              |
| Occupational exposure to chromium                         | 293<br>(171–490)            | 0<br>(0–0)           | 0<br>(0–0)            | 0<br>(0–0)              | 0<br>(0–0)            | 0<br>(0–0)            | 0<br>(0–0)              |
| Occupational exposure to diesel engine exhaust            | 2,060<br>(1,180–3,422)      | 0<br>(0–0)           | 0<br>(0–0)            | 0<br>(0–0)              | 0<br>(0–0)            | 0<br>(0–0)            | 0<br>(0–0)              |
| Occupational exposure to second-hand smoke                | 3,854<br>(2,637–6,207)      | 0<br>(0–0)           | 0<br>(0–0)            | 0<br>(0–0)              | 0<br>(0–0)            | 0<br>(0–0)            | 0<br>(0–0)              |
| Occupational exposure to formaldehyde                     | 179<br>(77–325)             | 0<br>(0–0)           | 0<br>(0–0)            | 0<br>(0–0)              | 0<br>(0–0)            | 0<br>(0–0)            | 0<br>(0–0)              |
| Occupational exposure to nickel                           | 1,425<br>(369–3,031)        | 0<br>(0–0)           | 0<br>(0–0)            | 0<br>(0–0)              | 0<br>(0–0)            | 0<br>(0–0)            | 0<br>(0–0)              |
| Occupational exposure to polycyclic aromatic hydrocarbons | 492<br>(230–864)            | 0<br>(0–0)           | 0<br>(0–0)            | 0<br>(0–0)              | 0<br>(0–0)            | 0<br>(0–0)            | 0<br>(0–0)              |
| Occupational exposure to silica                           | 1,185<br>(797–1,975)        | 0<br>(0–0)           | 0<br>(0–0)            | 0<br>(0–0)              | 0<br>(0–0)            | 0<br>(0–0)            | 0<br>(0–0)              |
| Occupational exposure to sulfuric acid                    | 193<br>(55–452)             | 0<br>(0–0)           | 0<br>(0–0)            | 0<br>(0–0)              | 0<br>(0–0)            | 0<br>(0–0)            | 0<br>(0–0)              |
| Occupational asthmagens                                   | 10,485<br>(5,116–19,129)    | 0<br>(0–0)           | 0<br>(0–0)            | 0<br>(0–0)              | 0<br>(0–0)            | 0<br>(0–0)            | 0<br>(0–0)              |
| Occupational particulate matter, gases, and fumes         | 68,281<br>(29,408–112,504)  | 0<br>(0–0)           | 0<br>(0–0)            | 0<br>(0–0)              | 0<br>(0–0)            | 0<br>(0–0)            | 0<br>(0–0)              |
| Occupational noise                                        | 0<br>(0–0)                  | 0<br>(0–0)           | 0<br>(0–0)            | 0<br>(0–0)              | 0<br>(0–0)            | 0<br>(0–0)            | 0<br>(0–0)              |
| Occupational risk factors for injuries                    | 21,211<br>(16,479–27,705)   | 0<br>(0–0)           | 0<br>(0–0)            | 0<br>(0–0)              | 0<br>(0–0)            | 0<br>(0–0)            | 0<br>(0–0)              |
| Occupational low back pain                                | 0<br>(0–0)                  | 0<br>(0–0)           | 0<br>(0–0)            | 0<br>(0–0)              | 0<br>(0–0)            | 0<br>(0–0)            | 0<br>(0–0)              |
| Sexual abuse and violence                                 |                             |                      |                       |                         |                       |                       |                         |
| Childhood sexual abuse                                    |                             |                      |                       |                         |                       |                       |                         |
| Intimate partner violence                                 |                             |                      |                       |                         |                       |                       |                         |

**Web table 2: Global deaths attributable to risk factors by age and sex in 1990**

| Risk                                         | Females,<br>15-19 Years  | Females,<br>20-24 Years   | Females,<br>25-29 Years   | Females,<br>30-34 Years   | Females,<br>35-39 Years   | Females,<br>40-44 Years   | Females,<br>45-49 Years   |
|----------------------------------------------|--------------------------|---------------------------|---------------------------|---------------------------|---------------------------|---------------------------|---------------------------|
| Unimproved water and sanitation              | 5,989<br>(287-11,946)    | 6,668<br>(262-12,835)     | 6,192<br>(275-11,981)     | 5,679<br>(261-10,770)     | 5,783<br>(269-11,006)     | 4,659<br>(205-8,905)      | 4,970<br>(239-9,497)      |
| Unimproved water source                      | 2,332<br>(160-4,949)     | 2,585<br>(165-5,359)      | 2,488<br>(163-5,111)      | 2,312<br>(155-4,666)      | 2,349<br>(161-4,859)      | 1,889<br>(121-3,918)      | 1,962<br>(138-4,066)      |
| Unimproved sanitation                        | 4,220<br>(131-8,598)     | 4,713<br>(114-9,364)      | 4,312<br>(121-8,575)      | 3,932<br>(107-7,884)      | 4,011<br>(115-7,992)      | 3,234<br>(88-6,441)       | 3,489<br>(105-6,880)      |
| Air pollution                                |                          |                           |                           |                           |                           |                           |                           |
| Ambient particulate matter pollution         | 0<br>(0-0)               | 0<br>(0-0)                | 7,434<br>(5,241-9,893)    | 10,384<br>(7,385-13,633)  | 15,759<br>(11,449-21,015) | 22,809<br>(16,318-30,130) | 31,263<br>(22,030-40,970) |
| Household air pollution from solid fuels     | 0<br>(0-0)               | 0<br>(0-0)                | 11,539<br>(8,869-14,356)  | 15,821<br>(12,262-19,705) | 24,827<br>(19,194-31,052) | 35,092<br>(27,078-44,466) | 49,316<br>(38,513-61,565) |
| Ambient ozone pollution                      | 0<br>(0-0)               | 0<br>(0-0)                | 214<br>(66-405)           | 256<br>(80-468)           | 502<br>(167-930)          | 649<br>(211-1,146)        | 1,066<br>(350-1,917)      |
| Other environmental risks                    | 0<br>(0-0)               | 0<br>(0-0)                | 2,687<br>(1,137-4,480)    | 3,534<br>(1,615-5,759)    | 2,278<br>(1,631-3,188)    | 3,224<br>(2,339-4,476)    | 3,810<br>(3,035-4,763)    |
| Residential radon                            |                          |                           |                           |                           |                           |                           |                           |
| Lead exposure                                | 0<br>(0-0)               | 0<br>(0-0)                | 2,687<br>(1,137-4,480)    | 3,534<br>(1,615-5,759)    | 2,278<br>(1,631-3,188)    | 3,224<br>(2,339-4,476)    | 3,810<br>(3,035-4,763)    |
| Child and maternal undernutrition            | 10,605<br>(6,423-15,267) | 18,966<br>(12,018-25,498) | 18,343<br>(11,020-24,593) | 16,922<br>(10,098-23,185) | 16,667<br>(9,851-23,049)  | 9,684<br>(5,792-13,575)   | 5,410<br>(3,224-7,596)    |
| Suboptimal breastfeeding                     | 0<br>(0-0)               | 0<br>(0-0)                | 0<br>(0-0)                | 0<br>(0-0)                | 0<br>(0-0)                | 0<br>(0-0)                | 0<br>(0-0)                |
| Non-exclusive breastfeeding                  | 0<br>(0-0)               | 0<br>(0-0)                | 0<br>(0-0)                | 0<br>(0-0)                | 0<br>(0-0)                | 0<br>(0-0)                | 0<br>(0-0)                |
| Discontinued breastfeeding                   | 0<br>(0-0)               | 0<br>(0-0)                | 0<br>(0-0)                | 0<br>(0-0)                | 0<br>(0-0)                | 0<br>(0-0)                | 0<br>(0-0)                |
| Childhood underweight                        | 0<br>(0-0)               | 0<br>(0-0)                | 0<br>(0-0)                | 0<br>(0-0)                | 0<br>(0-0)                | 0<br>(0-0)                | 0<br>(0-0)                |
| Iron deficiency                              | 10,605<br>(6,423-15,267) | 18,966<br>(12,018-25,498) | 18,343<br>(11,020-24,593) | 16,922<br>(10,098-23,185) | 16,667<br>(9,851-23,049)  | 9,684<br>(5,792-13,575)   | 5,410<br>(3,224-7,596)    |
| Vitamin A deficiency                         | 0<br>(0-0)               | 0<br>(0-0)                | 0<br>(0-0)                | 0<br>(0-0)                | 0<br>(0-0)                | 0<br>(0-0)                | 0<br>(0-0)                |
| Zinc deficiency                              | 0<br>(0-0)               | 0<br>(0-0)                | 0<br>(0-0)                | 0<br>(0-0)                | 0<br>(0-0)                | 0<br>(0-0)                | 0<br>(0-0)                |
| Tobacco smoking, including second-hand smoke | 0<br>(0-0)               | 0<br>(0-0)                | 1,659<br>(1,076-2,342)    | 10,828<br>(8,241-20,082)  | 20,285<br>(13,716-31,531) | 35,645<br>(24,979-50,351) | 42,540<br>(31,420-58,840) |
| Tobacco smoking                              | 0<br>(0-0)               | 0<br>(0-0)                | 0<br>(0-0)                | 8,519<br>(5,976-17,755)   | 17,271<br>(10,464-29,029) | 31,917<br>(20,612-46,536) | 36,592<br>(25,550-54,049) |
| Second-hand smoke                            | 0<br>(0-0)               | 0<br>(0-0)                | 1,659<br>(1,076-2,342)    | 2,308<br>(1,567-3,146)    | 3,014<br>(1,772-4,530)    | 3,728<br>(2,173-5,620)    | 5,948<br>(3,585-8,620)    |
| Alcohol and drug use                         | 8,264<br>(6,805-10,460)  | 10,273<br>(8,528-12,512)  | 11,613<br>(9,802-13,846)  | 22,143<br>(11,764-15,875) | 25,327<br>(18,326-28,822) | 28,864<br>(21,419-30,913) | 28,864<br>(24,627-33,907) |
| Alcohol use                                  | 6,830<br>(5,769-8,641)   | 8,052<br>(6,831-9,928)    | 9,217<br>(7,831-10,842)   | 11,512<br>(9,922-13,289)  | 20,415<br>(16,775-26,898) | 23,946<br>(20,064-29,599) | 27,667<br>(23,384-32,812) |
| Drug use                                     | 1,456<br>(757-2,602)     | 2,260<br>(1,270-3,738)    | 2,455<br>(1,513-3,894)    | 2,177<br>(1,389-3,411)    | 1,855<br>(1,264-2,891)    | 1,562<br>(1,129-2,315)    | 1,442<br>(1,070-2,021)    |

**Web table 2: Global deaths attributable to risk factors by age and sex in 1990**

| Risk                                          | Females,<br>15-19 Years | Females,<br>20-24 Years | Females,<br>25-29 Years   | Females,<br>30-34 Years   | Females,<br>35-39 Years   | Females,<br>40-44 Years   | Females,<br>45-49 Years    |
|-----------------------------------------------|-------------------------|-------------------------|---------------------------|---------------------------|---------------------------|---------------------------|----------------------------|
| Physiological risk factors                    |                         |                         |                           |                           |                           |                           |                            |
| High fasting plasma glucose                   | 0<br>(0-0)              | 0<br>(0-0)              | 5,070<br>(4,088-6,236)    | 6,192<br>(4,895-7,581)    | 11,594<br>(9,313-14,011)  | 14,669<br>(11,597-18,019) | 27,413<br>(22,502-32,931)  |
| High total cholesterol                        | 0<br>(0-0)              | 0<br>(0-0)              | 2,052<br>(1,331-2,949)    | 2,966<br>(1,961-4,267)    | 6,056<br>(4,513-8,037)    | 8,933<br>(6,656-11,673)   | 16,562<br>(13,084-20,598)  |
| High blood pressure                           | 0<br>(0-0)              | 0<br>(0-0)              | 7,908<br>(5,329-10,826)   | 10,297<br>(7,119-13,844)  | 25,787<br>(20,694-32,040) | 35,169<br>(27,884-43,460) | 70,373<br>(60,625-82,888)  |
| High body-mass index                          | 0<br>(0-0)              | 0<br>(0-0)              | 4,606<br>(3,252-6,149)    | 6,057<br>(4,283-8,037)    | 12,727<br>(9,546-16,221)  | 15,961<br>(12,261-20,050) | 25,769<br>(20,370-32,083)  |
| Low bone mineral density                      | 0<br>(0-0)              | 0<br>(0-0)              | 0<br>(0-0)                | 0<br>(0-0)                | 0<br>(0-0)                | 0<br>(0-0)                | 0<br>(0-0)                 |
| Dietary risk factors and physical inactivity  |                         |                         |                           |                           |                           |                           |                            |
| Diet low in fruits                            | 0<br>(0-0)              | 0<br>(0-0)              | 18,515<br>(15,647-21,598) | 27,254<br>(23,637-30,925) | 42,008<br>(36,399-49,088) | 62,872<br>(55,065-73,388) | 89,073<br>(78,174-102,421) |
| Diet low in vegetables                        | 0<br>(0-0)              | 0<br>(0-0)              | 10,638<br>(8,171-13,310)  | 15,198<br>(11,698-18,620) | 23,557<br>(18,331-29,974) | 35,664<br>(27,188-44,886) | 51,022<br>(39,236-63,618)  |
| Diet low in whole grains                      | 0<br>(0-0)              | 0<br>(0-0)              | 5,192<br>(3,063-7,296)    | 7,038<br>(4,380-9,614)    | 9,961<br>(5,825-14,138)   | 14,184<br>(8,119-20,389)  | 19,280<br>(10,746-27,371)  |
| Diet low in nuts and seeds                    | 0<br>(0-0)              | 0<br>(0-0)              | 4,422<br>(3,334-5,574)    | 6,048<br>(4,630-7,622)    | 8,680<br>(6,586-11,100)   | 12,501<br>(9,416-15,783)  | 16,758<br>(12,664-21,122)  |
| Diet low in milk                              | 0<br>(0-0)              | 0<br>(0-0)              | 4,833<br>(3,203-6,143)    | 6,919<br>(4,561-8,940)    | 9,377<br>(6,215-12,094)   | 13,346<br>(8,732-17,495)  | 17,615<br>(11,527-22,864)  |
| Diet high in red meat                         | 0<br>(0-0)              | 0<br>(0-0)              | 275<br>(78-491)           | 442<br>(123-771)          | 704<br>(202-1,215)        | 936<br>(252-1,608)        | 1,275<br>(360-2,225)       |
| Diet high in processed meat                   | 0<br>(0-0)              | 0<br>(0-0)              | 64<br>(17-110)            | 118<br>(30-212)           | 200<br>(54-354)           | 282<br>(76-488)           | 390<br>(104-668)           |
| Diet high in sugar-sweetened beverages        | 0<br>(0-0)              | 0<br>(0-0)              | 1,655<br>(373-3,126)      | 2,488<br>(574-4,558)      | 3,384<br>(819-5,783)      | 5,156<br>(1,208-9,144)    | 6,856<br>(1,694-12,295)    |
| Diet low in fibre                             | 0<br>(0-0)              | 0<br>(0-0)              | 877<br>(533-1,269)        | 1,114<br>(694-1,575)      | 1,516<br>(538-2,745)      | 1,898<br>(593-3,268)      | 2,172<br>(716-4,035)       |
| Diet low in calcium                           | 0<br>(0-0)              | 0<br>(0-0)              | 2,066<br>(957-3,151)      | 2,903<br>(1,384-4,359)    | 4,097<br>(1,939-6,235)    | 5,344<br>(2,580-8,180)    | 6,705<br>(3,111-10,224)    |
| Diet low in seafood omega-3 fatty acids       | 0<br>(0-0)              | 0<br>(0-0)              | 343<br>(206-482)          | 544<br>(312-743)          | 856<br>(518-1,147)        | 1,093<br>(710-1,453)      | 1,445<br>(976-1,918)       |
| Diet low in polyunsaturated fatty acids       | 0<br>(0-0)              | 0<br>(0-0)              | 3,186<br>(2,320-4,065)    | 4,518<br>(3,274-5,853)    | 6,011<br>(4,409-7,840)    | 8,475<br>(6,051-11,089)   | 11,005<br>(7,802-14,454)   |
| Diet high in trans fatty acids                | 0<br>(0-0)              | 0<br>(0-0)              | 1,346<br>(636-2,080)      | 1,885<br>(915-2,955)      | 2,538<br>(1,215-3,890)    | 3,518<br>(1,727-5,398)    | 4,575<br>(2,234-7,058)     |
| Diet high in sodium                           | 0<br>(0-0)              | 0<br>(0-0)              | 1,119<br>(771-1,495)      | 1,593<br>(1,112-2,112)    | 2,167<br>(1,529-2,953)    | 3,126<br>(2,240-4,232)    | 4,143<br>(2,945-5,551)     |
| Physical inactivity and low physical activity | 0<br>(0-0)              | 0<br>(0-0)              | 4,712<br>(2,750-6,668)    | 7,275<br>(4,753-9,769)    | 11,455<br>(6,857-17,174)  | 17,785<br>(11,150-25,074) | 23,974<br>(15,709-32,101)  |
| Occupational risk factors                     |                         |                         |                           |                           |                           |                           |                            |
| Occupational carcinogens                      | 2,688<br>(2,035-3,657)  | 3,608<br>(2,728-4,817)  | 4,299<br>(3,347-5,548)    | 4,477<br>(3,506-5,649)    | 5,850<br>(4,254-7,633)    | 6,208<br>(4,498-8,069)    | 7,864<br>(5,395-10,804)    |

**Web table 2: Global deaths attributable to risk factors by age and sex in 1990**

| Risk                                                      | Females,<br>15-19 Years | Females,<br>20-24 Years | Females,<br>25-29 Years | Females,<br>30-34 Years | Females,<br>35-39 Years | Females,<br>40-44 Years | Females,<br>45-49 Years |
|-----------------------------------------------------------|-------------------------|-------------------------|-------------------------|-------------------------|-------------------------|-------------------------|-------------------------|
| Occupational exposure to asbestos                         | 31<br>(16-51)           | 31<br>(16-50)           | 36<br>(19-58)           | 51<br>(27-84)           | 83<br>(44-137)          | 132<br>(78-217)         | 205<br>(121-322)        |
| Occupational exposure to arsenic                          | 0<br>(0-0)              | 0<br>(0-0)              | 1<br>(0-3)              | 3<br>(1-6)              | 10<br>(3-20)            | 15<br>(5-30)            | 29<br>(11-58)           |
| Occupational exposure to benzene                          | 42<br>(16-83)           | 71<br>(28-139)          | 77<br>(30-148)          | 78<br>(30-149)          | 45<br>(17-86)           | 42<br>(16-78)           | 21<br>(8-41)            |
| Occupational exposure to beryllium                        | 0<br>(0-0)              | 0<br>(0-0)              | 0<br>(0-0)              | 0<br>(0-0)              | 1<br>(0-1)              | 1<br>(0-2)              | 2<br>(1-3)              |
| Occupational exposure to cadmium                          | 0<br>(0-0)              | 0<br>(0-0)              | 0<br>(0-0)              | 0<br>(0-1)              | 2<br>(1-3)              | 2<br>(1-4)              | 5<br>(2-9)              |
| Occupational exposure to chromium                         | 0<br>(0-0)              | 0<br>(0-0)              | 1<br>(0-2)              | 2<br>(1-3)              | 6<br>(3-10)             | 9<br>(5-16)             | 18<br>(10-31)           |
| Occupational exposure to diesel engine exhaust            | 0<br>(0-0)              | 0<br>(0-0)              | 6<br>(3-12)             | 13<br>(6-24)            | 41<br>(21-73)           | 63<br>(33-112)          | 129<br>(69-220)         |
| Occupational exposure to second-hand smoke                | 0<br>(0-0)              | 0<br>(0-0)              | 11<br>(5-22)            | 23<br>(12-41)           | 76<br>(45-132)          | 117<br>(74-198)         | 240<br>(147-384)        |
| Occupational exposure to formaldehyde                     | 9<br>(3-16)             | 16<br>(6-31)            | 18<br>(7-33)            | 20<br>(8-40)            | 14<br>(5-28)            | 14<br>(5-28)            | 8<br>(3-17)             |
| Occupational exposure to nickel                           | 0<br>(0-0)              | 0<br>(0-0)              | 4<br>(1-11)             | 9<br>(2-21)             | 30<br>(7-65)            | 44<br>(11-103)          | 89<br>(23-196)          |
| Occupational exposure to polycyclic aromatic hydrocarbons | 0<br>(0-0)              | 0<br>(0-0)              | 1<br>(1-3)              | 3<br>(1-6)              | 10<br>(4-18)            | 15<br>(7-28)            | 31<br>(14-56)           |
| Occupational exposure to silica                           | 0<br>(0-0)              | 0<br>(0-0)              | 4<br>(2-7)              | 7<br>(4-14)             | 25<br>(14-43)           | 37<br>(22-65)           | 75<br>(44-121)          |
| Occupational exposure to sulfuric acid                    | 0<br>(0-0)              | 0<br>(0-0)              | 1<br>(0-2)              | 1<br>(0-6)              | 3<br>(1-12)             | 6<br>(1-19)             | 11<br>(3-32)            |
| Occupational asthmagens                                   | 178<br>(75-401)         | 272<br>(127-558)        | 343<br>(152-759)        | 401<br>(186-807)        | 628<br>(290-1,261)      | 712<br>(347-1,439)      | 963<br>(452-1,890)      |
| Occupational particulate matter, gases, and fumes         | 0<br>(0-0)              | 0<br>(0-0)              | 785<br>(351-1,325)      | 1,075<br>(487-1,713)    | 2,234<br>(1,018-3,590)  | 2,892<br>(1,393-4,564)  | 4,343<br>(1,979-6,997)  |
| Occupational noise                                        | 0<br>(0-0)              |
| Occupational risk factors for injuries                    | 2,429<br>(1,793-3,324)  | 3,218<br>(2,359-4,461)  | 3,011<br>(2,279-4,049)  | 2,791<br>(2,141-3,748)  | 2,650<br>(1,935-3,816)  | 2,114<br>(1,641-2,809)  | 1,715<br>(1,328-2,262)  |
| Occupational low back pain                                | 0<br>(0-0)              |
| Sexual abuse and violence                                 |                         |                         |                         |                         |                         |                         |                         |
| Childhood sexual abuse                                    |                         |                         |                         |                         |                         |                         |                         |
| Intimate partner violence                                 |                         |                         |                         |                         |                         |                         |                         |

**Web table 2: Global deaths attributable to risk factors by age and sex in 1990**

| Risk                                         | Females,<br>50-54 Years    | Females,<br>55-59 Years     | Females,<br>60-64 Years      | Females,<br>65-69 Years      | Females,<br>70-74 Years      | Females,<br>75-79 Years      | Females,<br>80+ Years        |
|----------------------------------------------|----------------------------|-----------------------------|------------------------------|------------------------------|------------------------------|------------------------------|------------------------------|
| Unimproved water and sanitation              | 5,993<br>(287-11,521)      | 7,441<br>(336-14,532)       | 10,030<br>(467-19,862)       | 10,165<br>(517-20,180)       | 9,865<br>(465-18,995)        | 8,496<br>(378-16,307)        | 12,361<br>(627-23,548)       |
| Unimproved water source                      | 2,369<br>(162-4,916)       | 2,825<br>(181-5,902)        | 3,852<br>(255-8,376)         | 3,960<br>(293-8,347)         | 3,878<br>(257-8,011)         | 3,350<br>(208-7,025)         | 4,728<br>(313-9,603)         |
| Unimproved sanitation                        | 4,204<br>(124-8,402)       | 5,313<br>(143-10,759)       | 7,132<br>(195-14,468)        | 7,183<br>(218-14,596)        | 6,938<br>(203-13,931)        | 5,955<br>(162-11,810)        | 8,738<br>(288-17,055)        |
| Air pollution                                |                            |                             |                              |                              |                              |                              |                              |
| Ambient particulate matter pollution         | 54,046<br>(38,883-69,091)  | 73,336<br>(51,273-95,704)   | 111,707<br>(81,389-142,223)  | 142,119<br>(98,529-186,124)  | 165,987<br>(114,686-214,281) | 199,110<br>(137,890-251,054) | 387,304<br>(275,527-489,629) |
| Household air pollution from solid fuels     | 86,101<br>(67,571-106,980) | 119,867<br>(91,352-148,292) | 181,354<br>(141,700-225,320) | 227,705<br>(173,140-278,803) | 269,607<br>(207,290-331,856) | 275,483<br>(212,533-340,451) | 437,548<br>(334,811-544,111) |
| Ambient ozone pollution                      | 2,131<br>(678-3,739)       | 3,709<br>(1,192-6,564)      | 6,429<br>(2,111-11,412)      | 8,711<br>(2,827-15,251)      | 10,818<br>(3,611-18,984)     | 11,346<br>(3,697-19,955)     | 20,444<br>(6,507-36,593)     |
| Other environmental risks                    | 6,258<br>(5,028-7,783)     | 7,926<br>(6,428-9,801)      | 11,484<br>(9,310-14,088)     | 13,657<br>(11,230-16,420)    | 13,738<br>(11,372-16,579)    | 13,840<br>(11,569-16,433)    | 18,264<br>(14,945-21,739)    |
| Residential radon                            |                            |                             |                              |                              |                              |                              |                              |
| Lead exposure                                | 6,258<br>(5,028-7,783)     | 7,926<br>(6,428-9,801)      | 11,484<br>(9,310-14,088)     | 13,657<br>(11,230-16,420)    | 13,738<br>(11,372-16,579)    | 13,840<br>(11,569-16,433)    | 18,264<br>(14,945-21,739)    |
| Child and maternal undernutrition            | 1,091<br>(762-1,580)       | 1,227<br>(862-1,698)        | 1,637<br>(1,125-2,361)       | 1,924<br>(1,282-2,582)       | 2,369<br>(1,491-3,309)       | 2,691<br>(1,842-3,671)       | 8,036<br>(5,718-11,143)      |
| Suboptimal breastfeeding                     | 0<br>(0-0)                 | 0<br>(0-0)                  | 0<br>(0-0)                   | 0<br>(0-0)                   | 0<br>(0-0)                   | 0<br>(0-0)                   | 0<br>(0-0)                   |
| Non-exclusive breastfeeding                  | 0<br>(0-0)                 | 0<br>(0-0)                  | 0<br>(0-0)                   | 0<br>(0-0)                   | 0<br>(0-0)                   | 0<br>(0-0)                   | 0<br>(0-0)                   |
| Discontinued breastfeeding                   | 0<br>(0-0)                 | 0<br>(0-0)                  | 0<br>(0-0)                   | 0<br>(0-0)                   | 0<br>(0-0)                   | 0<br>(0-0)                   | 0<br>(0-0)                   |
| Childhood underweight                        | 0<br>(0-0)                 | 0<br>(0-0)                  | 0<br>(0-0)                   | 0<br>(0-0)                   | 0<br>(0-0)                   | 0<br>(0-0)                   | 0<br>(0-0)                   |
| Iron deficiency                              | 1,091<br>(762-1,580)       | 1,227<br>(862-1,698)        | 1,637<br>(1,125-2,361)       | 1,924<br>(1,282-2,582)       | 2,369<br>(1,491-3,309)       | 2,691<br>(1,842-3,671)       | 8,036<br>(5,718-11,143)      |
| Vitamin A deficiency                         | 0<br>(0-0)                 | 0<br>(0-0)                  | 0<br>(0-0)                   | 0<br>(0-0)                   | 0<br>(0-0)                   | 0<br>(0-0)                   | 0<br>(0-0)                   |
| Zinc deficiency                              | 0<br>(0-0)                 | 0<br>(0-0)                  | 0<br>(0-0)                   | 0<br>(0-0)                   | 0<br>(0-0)                   | 0<br>(0-0)                   | 0<br>(0-0)                   |
| Tobacco smoking, including second-hand smoke | 76,992<br>(55,221-108,336) | 115,908<br>(84,799-157,759) | 162,547<br>(121,542-230,043) | 205,181<br>(149,958-284,345) | 226,541<br>(166,738-306,635) | 228,343<br>(176,839-330,587) | 364,226<br>(299,349-521,567) |
| Tobacco smoking                              | 67,068<br>(44,818-97,996)  | 102,666<br>(71,940-145,381) | 142,633<br>(101,766-209,931) | 178,619<br>(123,696-260,353) | 194,404<br>(130,651-274,247) | 185,776<br>(133,885-290,612) | 278,639<br>(214,605-429,742) |
| Second-hand smoke                            | 9,924<br>(6,198-13,638)    | 13,242<br>(8,265-18,667)    | 19,914<br>(12,680-26,957)    | 26,562<br>(17,227-35,711)    | 32,137<br>(20,395-43,278)    | 42,567<br>(27,442-56,929)    | 85,587<br>(57,225-112,448)   |
| Alcohol and drug use                         | 42,987<br>(36,781-50,217)  | 52,132<br>(43,936-61,070)   | 72,953<br>(61,864-85,562)    | 63,761<br>(51,391-77,982)    | 66,341<br>(51,127-82,619)    | 94,525<br>(69,818-120,014)   | 183,455<br>(121,787-248,429) |
| Alcohol use                                  | 41,760<br>(35,541-48,952)  | 50,944<br>(42,790-60,020)   | 71,603<br>(60,510-84,200)    | 63,449<br>(51,159-77,551)    | 66,037<br>(50,920-82,365)    | 94,204<br>(69,520-119,674)   | 182,936<br>(121,208-247,457) |



**Web table 2: Global deaths attributable to risk factors by age and sex in 1990**

| Risk                                          | Females,<br>50-54 Years      | Females,<br>55-59 Years      | Females,<br>60-64 Years      | Females,<br>65-69 Years      | Females,<br>70-74 Years      | Females,<br>75-79 Years      | Females,<br>80+ Years              |
|-----------------------------------------------|------------------------------|------------------------------|------------------------------|------------------------------|------------------------------|------------------------------|------------------------------------|
| Drug use                                      | 1,611<br>(1,242–2,288)       | 1,721<br>(1,357–2,182)       | 2,079<br>(1,636–2,691)       | 312<br>(195–659)             | 304<br>(163–635)             | 321<br>(183–772)             | 519<br>(288–1,192)                 |
| Physiological risk factors                    |                              |                              |                              |                              |                              |                              |                                    |
| High fasting plasma glucose                   | 45,087<br>(37,408–53,767)    | 73,652<br>(62,219–86,823)    | 108,385<br>(91,409–127,338)  | 140,492<br>(119,506–164,596) | 151,485<br>(127,158–177,095) | 177,457<br>(146,548–210,962) | 291,278<br>(235,746–350,946)       |
| High total cholesterol                        | 30,319<br>(23,938–38,209)    | 46,896<br>(38,424–57,765)    | 82,633<br>(68,268–98,865)    | 117,076<br>(96,950–138,842)  | 133,845<br>(107,313–162,954) | 184,409<br>(135,403–235,836) | 377,426<br>(309,562–448,311)       |
| High blood pressure                           | 115,508<br>(100,112–132,648) | 186,025<br>(164,527–214,740) | 284,342<br>(254,571–323,796) | 420,833<br>(382,943–466,796) | 500,191<br>(455,565–558,576) | 706,140<br>(650,568–770,223) | 1,518,025<br>(1,406,171–1,641,440) |
| High body-mass index                          | 42,747<br>(34,193–52,226)    | 62,339<br>(50,993–74,846)    | 101,668<br>(83,811–121,354)  | 126,957<br>(105,409–149,973) | 139,184<br>(114,292–165,765) | 188,706<br>(154,513–222,922) | 349,783<br>(276,789–422,768)       |
| Low bone mineral density                      | 1,924<br>(1,447–2,528)       | 2,262<br>(1,699–3,019)       | 3,130<br>(2,280–4,308)       | 4,198<br>(3,107–5,472)       | 4,931<br>(3,711–6,459)       | 8,543<br>(6,278–11,265)      | 25,466<br>(19,176–33,059)          |
| Dietary risk factors and physical inactivity  | 154,130<br>(136,842–173,607) | 209,480<br>(187,845–241,672) | 324,050<br>(292,151–367,541) | 436,074<br>(394,483–489,181) | 517,508<br>(465,335–581,643) | 683,350<br>(620,976–749,752) | 1,418,810<br>(1,273,536–1,560,003) |
| Diet low in fruits                            | 85,813<br>(66,952–106,408)   | 112,602<br>(86,574–140,301)  | 157,834<br>(121,107–195,939) | 200,605<br>(154,037–248,681) | 227,016<br>(169,460–281,111) | 269,725<br>(203,689–331,856) | 464,114<br>(349,633–581,084)       |
| Diet low in vegetables                        | 31,772<br>(18,703–45,113)    | 39,805<br>(23,776–56,840)    | 58,780<br>(37,604–80,563)    | 75,235<br>(48,756–105,133)   | 85,585<br>(56,138–117,344)   | 112,428<br>(73,352–151,662)  | 215,050<br>(138,443–291,901)       |
| Diet low in whole grains                      | 27,641<br>(21,411–34,615)    | 35,454<br>(27,095–44,836)    | 52,925<br>(40,221–66,362)    | 67,044<br>(51,551–83,307)    | 76,350<br>(58,832–94,654)    | 97,041<br>(74,164–119,173)   | 175,736<br>(133,946–215,379)       |
| Diet low in nuts and seeds                    | 31,465<br>(20,000–41,539)    | 41,616<br>(26,285–56,298)    | 68,941<br>(44,040–91,218)    | 93,780<br>(58,963–123,498)   | 108,731<br>(67,212–144,350)  | 148,956<br>(91,323–198,325)  | 326,906<br>(196,128–439,292)       |
| Diet low in milk                              | 2,039<br>(580–3,520)         | 2,697<br>(818–4,630)         | 3,700<br>(1,076–6,368)       | 4,298<br>(1,289–7,472)       | 4,366<br>(1,310–7,506)       | 4,997<br>(1,441–8,644)       | 7,583<br>(2,223–13,137)            |
| Diet high in red meat                         | 660<br>(182–1,164)           | 902<br>(250–1,591)           | 1,323<br>(356–2,315)         | 1,621<br>(444–2,829)         | 1,627<br>(447–2,871)         | 2,054<br>(557–3,613)         | 3,311<br>(908–5,844)               |
| Diet high in processed meat                   | 11,923<br>(2,813–20,933)     | 15,832<br>(3,739–27,106)     | 26,188<br>(5,947–45,298)     | 35,332<br>(7,879–61,701)     | 39,526<br>(8,422–69,687)     | 57,082<br>(12,111–100,327)   | 129,057<br>(26,220–229,386)        |
| Diet high in sugar-sweetened beverages        | 3,439<br>(1,036–6,293)       | 3,947<br>(1,875–7,503)       | 5,414<br>(2,519–10,089)      | 6,170<br>(3,561–11,500)      | 6,818<br>(3,750–13,972)      | 8,436<br>(3,887–15,291)      | 18,642<br>(6,876–28,218)           |
| Diet low in fibre                             | 10,877<br>(5,044–16,602)     | 13,908<br>(6,535–21,388)     | 20,860<br>(9,565–32,248)     | 26,560<br>(12,018–41,899)    | 30,822<br>(13,661–48,867)    | 40,621<br>(18,170–64,903)    | 85,778<br>(36,125–139,541)         |
| Diet low in calcium                           | 2,257<br>(1,525–2,964)       | 2,948<br>(2,024–3,870)       | 3,930<br>(2,629–5,256)       | 4,386<br>(3,001–5,844)       | 4,470<br>(3,078–5,985)       | 4,741<br>(3,241–6,258)       | 6,318<br>(4,290–8,734)             |
| Diet low in seafood omega-3 fatty acids       | 19,296<br>(13,913–25,289)    | 24,698<br>(17,807–32,910)    | 39,852<br>(28,973–51,998)    | 52,438<br>(37,878–67,905)    | 58,971<br>(42,443–76,441)    | 77,862<br>(56,124–99,071)    | 160,127<br>(114,316–205,616)       |
| Diet low in polyunsaturated fatty acids       | 7,922<br>(3,791–12,394)      | 10,305<br>(5,011–15,798)     | 16,581<br>(7,862–26,049)     | 21,982<br>(10,643–33,817)    | 24,938<br>(11,907–38,651)    | 33,375<br>(16,113–51,273)    | 70,423<br>(33,354–109,141)         |
| Diet high in trans fatty acids                | 6,654<br>(4,755–8,719)       | 8,749<br>(6,284–11,560)      | 13,661<br>(9,777–17,960)     | 18,207<br>(13,023–23,430)    | 20,770<br>(14,593–26,779)    | 25,850<br>(18,266–33,300)    | 58,696<br>(41,495–75,692)          |
| Diet high in sodium                           | 42,315<br>(27,809–56,539)    | 59,461<br>(38,564–79,695)    | 93,535<br>(59,770–126,584)   | 127,253<br>(80,886–170,937)  | 145,788<br>(93,041–198,659)  | 179,215<br>(112,295–242,259) | 334,875<br>(209,095–456,881)       |
| Physical inactivity and low physical activity |                              |                              |                              |                              |                              |                              |                                    |

**Web table 2: Global deaths attributable to risk factors by age and sex in 1990**

| Risk                                                      | Females,<br>50-54 Years  | Females,<br>55-59 Years  | Females,<br>60-64 Years   | Females,<br>65-69 Years  | Females,<br>70-74 Years  | Females,<br>75-79 Years  | Females,<br>80+ Years  |
|-----------------------------------------------------------|--------------------------|--------------------------|---------------------------|--------------------------|--------------------------|--------------------------|------------------------|
| Occupational risk factors                                 | 11,341<br>(6,798–16,329) | 14,883<br>(8,680–22,053) | 18,064<br>(10,016–27,727) | 10,880<br>(6,148–16,631) | 12,621<br>(6,743–19,903) | 11,773<br>(6,135–18,529) | 2,187<br>(1,613–3,332) |
| Occupational carcinogens                                  | 1,362<br>(879–2,152)     | 2,191<br>(1,375–3,475)   | 2,796<br>(1,841–4,396)    | 2,266<br>(1,505–3,420)   | 2,180<br>(1,488–3,391)   | 1,542<br>(1,115–2,245)   | 2,187<br>(1,613–3,332) |
| Occupational exposure to asbestos                         | 312<br>(190–494)         | 447<br>(275–702)         | 640<br>(412–1,003)        | 847<br>(562–1,336)       | 799<br>(533–1,260)       | 929<br>(608–1,478)       | 1,493<br>(983–2,421)   |
| Occupational exposure to arsenic                          | 49<br>(18–97)            | 82<br>(30–162)           | 99<br>(38–196)            | 63<br>(24–122)           | 62<br>(22–129)           | 23<br>(9–51)             | 27<br>(10–55)          |
| Occupational exposure to benzene                          | 26<br>(10–49)            | 36<br>(14–67)            | 46<br>(17–86)             | 64<br>(24–119)           | 62<br>(23–116)           | 84<br>(32–159)           | 75<br>(26–144)         |
| Occupational exposure to beryllium                        | 3<br>(1–5)               | 5<br>(2–9)               | 6<br>(2–11)               | 3<br>(1–7)               | 3<br>(1–7)               | 1<br>(1–3)               | 2<br>(1–3)             |
| Occupational exposure to cadmium                          | 8<br>(3–14)              | 13<br>(5–24)             | 16<br>(7–30)              | 10<br>(4–18)             | 10<br>(4–19)             | 4<br>(2–7)               | 5<br>(2–9)             |
| Occupational exposure to chromium                         | 31<br>(17–51)            | 51<br>(28–92)            | 63<br>(35–112)            | 40<br>(22–70)            | 39<br>(22–71)            | 15<br>(8–27)             | 18<br>(10–33)          |
| Occupational exposure to diesel engine exhaust            | 216<br>(120–377)         | 362<br>(192–643)         | 448<br>(246–775)          | 280<br>(153–491)         | 272<br>(147–497)         | 106<br>(57–192)          | 125<br>(67–229)        |
| Occupational exposure to second-hand smoke                | 400<br>(257–654)         | 673<br>(419–1,105)       | 834<br>(521–1,420)        | 527<br>(339–873)         | 508<br>(321–920)         | 201<br>(131–358)         | 242<br>(162–415)       |
| Occupational exposure to formaldehyde                     | 8<br>(3–16)              | 11<br>(4–20)             | 11<br>(4–23)              | 14<br>(6–29)             | 12<br>(5–23)             | 14<br>(6–28)             | 9<br>(4–18)            |
| Occupational exposure to nickel                           | 149<br>(38–323)          | 250<br>(63–528)          | 306<br>(80–662)           | 193<br>(50–419)          | 191<br>(47–437)          | 74<br>(19–164)           | 87<br>(22–189)         |
| Occupational exposure to polycyclic aromatic hydrocarbons | 51<br>(23–92)            | 86<br>(38–160)           | 107<br>(50–195)           | 67<br>(31–120)           | 65<br>(29–125)           | 26<br>(11–49)            | 31<br>(14–58)          |
| Occupational exposure to silica                           | 125<br>(78–211)          | 209<br>(125–362)         | 255<br>(153–454)          | 160<br>(99–273)          | 157<br>(98–289)          | 60<br>(37–111)           | 71<br>(44–128)         |
| Occupational exposure to sulfuric acid                    | 18<br>(5–50)             | 31<br>(8–74)             | 43<br>(11–103)            | 27<br>(8–66)             | 28<br>(8–68)             | 10<br>(3–23)             | 13<br>(4–28)           |
| Occupational asthmagens                                   | 1,194<br>(592–2,404)     | 1,438<br>(687–2,787)     | 1,585<br>(706–3,108)      | 901<br>(431–1,594)       | 974<br>(436–1,741)       | 896<br>(423–1,626)       | 0<br>(0–0)             |
| Occupational particulate matter, gases, and fumes         | 7,346<br>(3,075–11,940)  | 10,304<br>(4,466–16,919) | 13,140<br>(5,688–22,093)  | 7,528<br>(3,125–12,790)  | 9,340<br>(3,796–16,107)  | 9,294<br>(3,827–15,961)  | 0<br>(0–0)             |
| Occupational noise                                        | 0<br>(0–0)               | 0<br>(0–0)               | 0<br>(0–0)                | 0<br>(0–0)               | 0<br>(0–0)               | 0<br>(0–0)               | 0<br>(0–0)             |
| Occupational risk factors for injuries                    | 1,438<br>(1,137–1,927)   | 949<br>(735–1,264)       | 542<br>(423–712)          | 184<br>(146–241)         | 127<br>(102–163)         | 42<br>(34–53)            | 0<br>(0–0)             |
| Occupational low back pain                                | 0<br>(0–0)               | 0<br>(0–0)               | 0<br>(0–0)                | 0<br>(0–0)               | 0<br>(0–0)               | 0<br>(0–0)               | 0<br>(0–0)             |
| Sexual abuse and violence                                 |                          |                          |                           |                          |                          |                          |                        |
| Childhood sexual abuse                                    |                          |                          |                           |                          |                          |                          |                        |
| Intimate partner violence                                 |                          |                          |                           |                          |                          |                          |                        |

0 indicates zero deaths attributable; blank cells indicate that attributable deaths were not quantified

**Web table 3: Global DALYs (in thousands) attributable to risk factors by age and sex in 2010**

| Risk                                         | Both Sexes,<br>All Ages      | Both Sexes,<br>0-6 Days | Both Sexes,<br>7-27 Days | Both Sexes,<br>28-364 Days | Both Sexes,<br>1-4 Years  | Both Sexes,<br>5-9 Years | Both Sexes,<br>10-14 Years |
|----------------------------------------------|------------------------------|-------------------------|--------------------------|----------------------------|---------------------------|--------------------------|----------------------------|
| Unimproved water and sanitation              | 21,187<br>(866-40,957)       | 497<br>(23-998)         | 1,004<br>(45-1,945)      | 6,877<br>(298-13,001)      | 5,537<br>(242-10,497)     | 1,163<br>(45-2,257)      | 596<br>(24-1,232)          |
| Unimproved water source                      | 7,775<br>(514-15,705)        | 196<br>(14-410)         | 378<br>(25-773)          | 2,675<br>(178-5,268)       | 2,161<br>(145-4,285)      | 399<br>(25-815)          | 194<br>(12-421)            |
| Unimproved sanitation                        | 14,927<br>(377-29,705)       | 340<br>(9-718)          | 702<br>(19-1,410)        | 4,722<br>(123-9,234)       | 3,806<br>(100-7,526)      | 840<br>(21-1,693)        | 438<br>(11-917)            |
| Air pollution                                |                              |                         |                          |                            |                           |                          |                            |
| Ambient particulate matter pollution         | 76,163<br>(68,086-85,171)    | 1,423<br>(903-2,071)    | 1,193<br>(762-1,683)     | 5,134<br>(3,490-6,910)     | 3,213<br>(2,154-4,473)    | 0<br>(0-0)               | 0<br>(0-0)                 |
| Household air pollution from solid fuels     | 108,084<br>(84,891-132,983)  | 4,831<br>(3,181-6,620)  | 3,861<br>(2,602-5,114)   | 17,944<br>(12,443-22,951)  | 11,048<br>(7,825-14,805)  | 0<br>(0-0)               | 0<br>(0-0)                 |
| Ambient ozone pollution                      | 2,456<br>(837-4,299)         | 0<br>(0-0)              | 0<br>(0-0)               | 0<br>(0-0)                 | 0<br>(0-0)                | 0<br>(0-0)               | 0<br>(0-0)                 |
| Other environmental risks                    | 16,051<br>(13,212-19,503)    | 0<br>(0-0)              | 0<br>(0-0)               | 0<br>(0-0)                 | 3<br>(1-6)                | 12<br>(6-22)             | 9<br>(4-16)                |
| Residential radon                            | 2,114<br>(273-4,660)         | 0<br>(0-0)              | 0<br>(0-0)               | 0<br>(0-0)                 | 0<br>(0-0)                | 0<br>(0-0)               | 0<br>(0-0)                 |
| Lead exposure                                | 13,936<br>(11,750-16,327)    | 0<br>(0-0)              | 0<br>(0-0)               | 0<br>(0-0)                 | 3<br>(1-6)                | 12<br>(6-22)             | 9<br>(4-16)                |
| Child and maternal undernutrition            | 166,095<br>(139,685-193,981) | 0<br>(0-0)              | 7,841<br>(4,684-10,683)  | 66,744<br>(54,093-80,472)  | 58,676<br>(48,384-70,282) | 6,580<br>(4,355-9,552)   | 4,573<br>(3,021-6,589)     |
| Suboptimal breastfeeding                     | 47,537<br>(29,868-67,518)    | 0<br>(0-0)              | 7,837<br>(4,680-10,678)  | 36,176<br>(21,735-52,955)  | 3,524<br>(352-7,682)      | 0<br>(0-0)               | 0<br>(0-0)                 |
| Non-exclusive breastfeeding                  | 41,108<br>(23,668-58,913)    | 0<br>(0-0)              | 7,837<br>(4,680-10,678)  | 33,271<br>(18,610-48,581)  | 0<br>(0-0)                | 0<br>(0-0)               | 0<br>(0-0)                 |
| Discontinued breastfeeding                   | 6,429<br>(605-14,426)        | 0<br>(0-0)              | 0<br>(0-0)               | 2,905<br>(268-6,661)       | 3,524<br>(352-7,682)      | 0<br>(0-0)               | 0<br>(0-0)                 |
| Childhood underweight                        | 77,316<br>(64,497-91,943)    | 0<br>(0-0)              | 0<br>(0-0)               | 40,458<br>(33,383-48,094)  | 36,858<br>(30,210-44,425) | 0<br>(0-0)               | 0<br>(0-0)                 |
| Iron deficiency                              | 48,225<br>(33,769-67,592)    | 0<br>(0-0)              | 4<br>(3-6)               | 3,717<br>(2,623-5,187)     | 11,670<br>(7,873-16,572)  | 6,580<br>(4,355-9,552)   | 4,573<br>(3,021-6,589)     |
| Vitamin A deficiency                         | 10,770<br>(5,625-17,149)     | 0<br>(0-0)              | 0<br>(0-0)               | 2,615<br>(1,211-4,453)     | 8,155<br>(4,281-12,707)   | 0<br>(0-0)               | 0<br>(0-0)                 |
| Zinc deficiency                              | 9,136<br>(2,458-16,903)      | 0<br>(0-0)              | 0<br>(0-0)               | 0<br>(0-0)                 | 9,136<br>(2,458-16,903)   | 0<br>(0-0)               | 0<br>(0-0)                 |
| Tobacco smoking, including second-hand smoke | 156,838<br>(136,543-173,057) | 1,326<br>(849-1,900)    | 1,118<br>(748-1,527)     | 5,322<br>(3,615-7,121)     | 3,077<br>(2,116-4,148)    | 0<br>(0-0)               | 0<br>(0-0)                 |
| Tobacco smoking                              | 136,907<br>(117,201-153,778) | 0<br>(0-0)              | 0<br>(0-0)               | 0<br>(0-0)                 | 0<br>(0-0)                | 0<br>(0-0)               | 0<br>(0-0)                 |
| Second-hand smoke                            | 19,931<br>(15,707-24,223)    | 1,326<br>(849-1,900)    | 1,118<br>(748-1,527)     | 5,322<br>(3,615-7,121)     | 3,077<br>(2,116-4,148)    | 0<br>(0-0)               | 0<br>(0-0)                 |
| Alcohol and drug use                         | 120,611<br>(107,670-134,693) | 47<br>(34-74)           | 40<br>(26-65)            | 240<br>(165-394)           | 630<br>(428-921)          | 220<br>(176-288)         | 536<br>(416-679)           |
| Alcohol use                                  | 97,237<br>(87,087-107,658)   | 19<br>(12-32)           | 10<br>(6-19)             | 90<br>(63-135)             | 422<br>(270-668)          | 175<br>(138-236)         | 404<br>(318-504)           |

**Web table 3: Global DALYs (in thousands) attributable to risk factors by age and sex in 2010**

| Risk                                          | Both Sexes,<br>All Ages      | Both Sexes,<br>0-6 Days | Both Sexes,<br>7-27 Days | Both Sexes,<br>28-364 Days | Both Sexes,<br>1-4 Years | Both Sexes,<br>5-9 Years | Both Sexes,<br>10-14 Years |
|-----------------------------------------------|------------------------------|-------------------------|--------------------------|----------------------------|--------------------------|--------------------------|----------------------------|
| Drug use                                      | 23,810<br>(18,780–29,246)    | 28<br>(16–51)           | 30<br>(17–54)            | 149<br>(83–307)            | 207<br>(107–362)         | 45<br>(27–85)            | 132<br>(87–199)            |
| Physiological risk factors                    |                              |                         |                          |                            |                          |                          |                            |
| High fasting plasma glucose                   | 89,012<br>(77,743–101,390)   | 0<br>(0–0)              | 0<br>(0–0)               | 0<br>(0–0)                 | 0<br>(0–0)               | 0<br>(0–0)               | 0<br>(0–0)                 |
| High total cholesterol                        | 40,900<br>(31,662–50,484)    | 0<br>(0–0)              | 0<br>(0–0)               | 0<br>(0–0)                 | 0<br>(0–0)               | 0<br>(0–0)               | 0<br>(0–0)                 |
| High blood pressure                           | 173,556<br>(155,939–189,025) | 0<br>(0–0)              | 0<br>(0–0)               | 0<br>(0–0)                 | 0<br>(0–0)               | 0<br>(0–0)               | 0<br>(0–0)                 |
| High body-mass index                          | 93,609<br>(77,107–110,600)   | 0<br>(0–0)              | 0<br>(0–0)               | 0<br>(0–0)                 | 0<br>(0–0)               | 0<br>(0–0)               | 0<br>(0–0)                 |
| Low bone mineral density                      | 5,216<br>(4,133–6,418)       | 0<br>(0–0)              | 0<br>(0–0)               | 0<br>(0–0)                 | 0<br>(0–0)               | 0<br>(0–0)               | 0<br>(0–0)                 |
| Dietary risk factors and physical inactivity  |                              |                         |                          |                            |                          |                          |                            |
| Diet low in fruits                            | 248,884<br>(232,462–264,494) | 0<br>(0–0)              | 0<br>(0–0)               | 0<br>(0–0)                 | 0<br>(0–0)               | 0<br>(0–0)               | 0<br>(0–0)                 |
| Diet low in vegetables                        | 104,095<br>(81,833–124,169)  | 0<br>(0–0)              | 0<br>(0–0)               | 0<br>(0–0)                 | 0<br>(0–0)               | 0<br>(0–0)               | 0<br>(0–0)                 |
| Diet low in whole grains                      | 38,559<br>(26,006–51,658)    | 0<br>(0–0)              | 0<br>(0–0)               | 0<br>(0–0)                 | 0<br>(0–0)               | 0<br>(0–0)               | 0<br>(0–0)                 |
| Diet low in nuts and seeds                    | 40,762<br>(32,112–48,486)    | 0<br>(0–0)              | 0<br>(0–0)               | 0<br>(0–0)                 | 0<br>(0–0)               | 0<br>(0–0)               | 0<br>(0–0)                 |
| Diet low in milk                              | 51,289<br>(33,482–65,959)    | 0<br>(0–0)              | 0<br>(0–0)               | 0<br>(0–0)                 | 0<br>(0–0)               | 0<br>(0–0)               | 0<br>(0–0)                 |
| Diet high in red meat                         | 2,101<br>(619–3,544)         | 0<br>(0–0)              | 0<br>(0–0)               | 0<br>(0–0)                 | 0<br>(0–0)               | 0<br>(0–0)               | 0<br>(0–0)                 |
| Diet high in processed meat                   | 1,853<br>(870–2,946)         | 0<br>(0–0)              | 0<br>(0–0)               | 0<br>(0–0)                 | 0<br>(0–0)               | 0<br>(0–0)               | 0<br>(0–0)                 |
| Diet high in sugar-sweetened beverages        | 20,939<br>(6,982–33,468)     | 0<br>(0–0)              | 0<br>(0–0)               | 0<br>(0–0)                 | 0<br>(0–0)               | 0<br>(0–0)               | 0<br>(0–0)                 |
| Diet low in fibre                             | 5,250<br>(3,052–7,402)       | 0<br>(0–0)              | 0<br>(0–0)               | 0<br>(0–0)                 | 0<br>(0–0)               | 0<br>(0–0)               | 0<br>(0–0)                 |
| Diet low in calcium                           | 16,452<br>(7,401–25,783)     | 0<br>(0–0)              | 0<br>(0–0)               | 0<br>(0–0)                 | 0<br>(0–0)               | 0<br>(0–0)               | 0<br>(0–0)                 |
| Diet low in seafood omega-3 fatty acids       | 2,590<br>(1,873–3,322)       | 0<br>(0–0)              | 0<br>(0–0)               | 0<br>(0–0)                 | 0<br>(0–0)               | 0<br>(0–0)               | 0<br>(0–0)                 |
| Diet low in polyunsaturated fatty acids       | 28,199<br>(20,624–35,974)    | 0<br>(0–0)              | 0<br>(0–0)               | 0<br>(0–0)                 | 0<br>(0–0)               | 0<br>(0–0)               | 0<br>(0–0)                 |
| Diet high in trans fatty acids                | 11,680<br>(5,360–17,798)     | 0<br>(0–0)              | 0<br>(0–0)               | 0<br>(0–0)                 | 0<br>(0–0)               | 0<br>(0–0)               | 0<br>(0–0)                 |
| Diet high in sodium                           | 11,592<br>(8,395–14,623)     | 0<br>(0–0)              | 0<br>(0–0)               | 0<br>(0–0)                 | 0<br>(0–0)               | 0<br>(0–0)               | 0<br>(0–0)                 |
| Physical inactivity and low physical activity | 61,231<br>(40,124–80,342)    | 0<br>(0–0)              | 0<br>(0–0)               | 0<br>(0–0)                 | 0<br>(0–0)               | 0<br>(0–0)               | 0<br>(0–0)                 |
|                                               | 69,318<br>(58,646–80,182)    | 0<br>(0–0)              | 0<br>(0–0)               | 0<br>(0–0)                 | 0<br>(0–0)               | 0<br>(0–0)               | 0<br>(0–0)                 |

**Web table 3: Global DALYs (in thousands) attributable to risk factors by age and sex in 2010**

| Risk                                                      | Both Sexes,<br>All Ages   | Both Sexes,<br>0-6 Days | Both Sexes,<br>7-27 Days | Both Sexes,<br>28-364 Days | Both Sexes,<br>1-4 Years | Both Sexes,<br>5-9 Years | Both Sexes,<br>10-14 Years |
|-----------------------------------------------------------|---------------------------|-------------------------|--------------------------|----------------------------|--------------------------|--------------------------|----------------------------|
| Occupational risk factors                                 | 62,488<br>(49,471–76,240) | 0<br>(0–0)              | 0<br>(0–0)               | 0<br>(0–0)                 | 0<br>(0–0)               | 0<br>(0–0)               | 0<br>(0–0)                 |
| Occupational carcinogens                                  | 2,681<br>(1,773–3,689)    | 0<br>(0–0)              | 0<br>(0–0)               | 0<br>(0–0)                 | 0<br>(0–0)               | 0<br>(0–0)               | 0<br>(0–0)                 |
| Occupational exposure to asbestos                         | 653<br>(389–840)          | 0<br>(0–0)              | 0<br>(0–0)               | 0<br>(0–0)                 | 0<br>(0–0)               | 0<br>(0–0)               | 0<br>(0–0)                 |
| Occupational exposure to arsenic                          | 63<br>(24–114)            | 0<br>(0–0)              | 0<br>(0–0)               | 0<br>(0–0)                 | 0<br>(0–0)               | 0<br>(0–0)               | 0<br>(0–0)                 |
| Occupational exposure to benzene                          | 92<br>(39–163)            | 0<br>(0–0)              | 0<br>(0–0)               | 0<br>(0–0)                 | 0<br>(0–0)               | 0<br>(0–0)               | 0<br>(0–0)                 |
| Occupational exposure to beryllium                        | 4<br>(2–6)                | 0<br>(0–0)              | 0<br>(0–0)               | 0<br>(0–0)                 | 0<br>(0–0)               | 0<br>(0–0)               | 0<br>(0–0)                 |
| Occupational exposure to cadmium                          | 13<br>(6–21)              | 0<br>(0–0)              | 0<br>(0–0)               | 0<br>(0–0)                 | 0<br>(0–0)               | 0<br>(0–0)               | 0<br>(0–0)                 |
| Occupational exposure to chromium                         | 45<br>(27–66)             | 0<br>(0–0)              | 0<br>(0–0)               | 0<br>(0–0)                 | 0<br>(0–0)               | 0<br>(0–0)               | 0<br>(0–0)                 |
| Occupational exposure to diesel engine exhaust            | 523<br>(292–789)          | 0<br>(0–0)              | 0<br>(0–0)               | 0<br>(0–0)                 | 0<br>(0–0)               | 0<br>(0–0)               | 0<br>(0–0)                 |
| Occupational exposure to second-hand smoke                | 572<br>(386–762)          | 0<br>(0–0)              | 0<br>(0–0)               | 0<br>(0–0)                 | 0<br>(0–0)               | 0<br>(0–0)               | 0<br>(0–0)                 |
| Occupational exposure to formaldehyde                     | 25<br>(11–47)             | 0<br>(0–0)              | 0<br>(0–0)               | 0<br>(0–0)                 | 0<br>(0–0)               | 0<br>(0–0)               | 0<br>(0–0)                 |
| Occupational exposure to nickel                           | 215<br>(58–443)           | 0<br>(0–0)              | 0<br>(0–0)               | 0<br>(0–0)                 | 0<br>(0–0)               | 0<br>(0–0)               | 0<br>(0–0)                 |
| Occupational exposure to polycyclic aromatic hydrocarbons | 96<br>(45–156)            | 0<br>(0–0)              | 0<br>(0–0)               | 0<br>(0–0)                 | 0<br>(0–0)               | 0<br>(0–0)               | 0<br>(0–0)                 |
| Occupational exposure to silica                           | 382<br>(239–526)          | 0<br>(0–0)              | 0<br>(0–0)               | 0<br>(0–0)                 | 0<br>(0–0)               | 0<br>(0–0)               | 0<br>(0–0)                 |
| Occupational exposure to sulfuric acid                    | 71<br>(21–152)            | 0<br>(0–0)              | 0<br>(0–0)               | 0<br>(0–0)                 | 0<br>(0–0)               | 0<br>(0–0)               | 0<br>(0–0)                 |
| Occupational asthmagens                                   | 2,020<br>(1,441–2,871)    | 0<br>(0–0)              | 0<br>(0–0)               | 0<br>(0–0)                 | 0<br>(0–0)               | 0<br>(0–0)               | 0<br>(0–0)                 |
| Occupational particulate matter, gases, and fumes         | 9,142<br>(4,377–14,250)   | 0<br>(0–0)              | 0<br>(0–0)               | 0<br>(0–0)                 | 0<br>(0–0)               | 0<br>(0–0)               | 0<br>(0–0)                 |
| Occupational noise                                        | 3,451<br>(2,072–5,574)    | 0<br>(0–0)              | 0<br>(0–0)               | 0<br>(0–0)                 | 0<br>(0–0)               | 0<br>(0–0)               | 0<br>(0–0)                 |
| Occupational risk factors for injuries                    | 23,444<br>(17,736–30,904) | 0<br>(0–0)              | 0<br>(0–0)               | 0<br>(0–0)                 | 0<br>(0–0)               | 0<br>(0–0)               | 0<br>(0–0)                 |
| Occupational low back pain                                | 21,750<br>(14,492–30,533) | 0<br>(0–0)              | 0<br>(0–0)               | 0<br>(0–0)                 | 0<br>(0–0)               | 0<br>(0–0)               | 0<br>(0–0)                 |
| Sexual abuse and violence                                 | 23,519<br>(17,961–30,322) | 0<br>(0–0)              | 0<br>(0–0)               | 0<br>(0–0)                 | 0<br>(0–0)               | 36<br>(25–51)            | 338<br>(241–455)           |
| Childhood sexual abuse                                    | 7,833<br>(5,964–10,005)   | 0<br>(0–0)              | 0<br>(0–0)               | 0<br>(0–0)                 | 0<br>(0–0)               | 36<br>(25–51)            | 338<br>(241–455)           |
| Intimate partner violence                                 | 16,794<br>(11,373–23,087) | 0<br>(0–0)              | 0<br>(0–0)               | 0<br>(0–0)                 | 0<br>(0–0)               | 0<br>(0–0)               | 0<br>(0–0)                 |

| Web table 3: Global DALYs (in thousands) attributable to risk factors by age and sex in 2010 |                            |                            |                            |                            |                            |                            |                            |
|----------------------------------------------------------------------------------------------|----------------------------|----------------------------|----------------------------|----------------------------|----------------------------|----------------------------|----------------------------|
| Risk                                                                                         | Both Sexes,<br>15-19 Years | Both Sexes,<br>20-24 Years | Both Sexes,<br>25-29 Years | Both Sexes,<br>30-34 Years | Both Sexes,<br>35-39 Years | Both Sexes,<br>40-44 Years | Both Sexes,<br>45-49 Years |
| Unimproved water and sanitation                                                              | 588<br>(22-1,216)          | 640<br>(24-1,282)          | 625<br>(25-1,247)          | 523<br>(20-1,005)          | 449<br>(16-892)            | 362<br>(13-717)            | 343<br>(12-681)            |
| Unimproved water source                                                                      | 197<br>(12-431)            | 219<br>(13-461)            | 219<br>(14-462)            | 181<br>(12-376)            | 151<br>(10-314)            | 119<br>(7-251)             | 108<br>(7-227)             |
| Unimproved sanitation                                                                        | 428<br>(10-898)            | 462<br>(10-947)            | 448<br>(11-927)            | 375<br>(9-746)             | 326<br>(7-663)             | 266<br>(6-545)             | 256<br>(5-527)             |
| Air pollution                                                                                |                            |                            |                            |                            |                            |                            |                            |
| Ambient particulate matter pollution                                                         | 0<br>(0-0)                 | 0<br>(0-0)                 | 1,300<br>(942-1,672)       | 1,720<br>(1,266-2,191)     | 2,560<br>(1,919-3,196)     | 4,020<br>(3,018-5,014)     | 5,034<br>(3,709-6,319)     |
| Household air pollution from solid fuels                                                     | 0<br>(0-0)                 | 0<br>(0-0)                 | 1,769<br>(1,255-2,370)     | 2,236<br>(1,608-3,007)     | 3,085<br>(2,165-4,117)     | 4,521<br>(3,191-5,976)     | 5,424<br>(3,830-7,250)     |
| Ambient ozone pollution                                                                      | 0<br>(0-0)                 | 0<br>(0-0)                 | 22<br>(7-45)               | 24<br>(7-49)               | 37<br>(12-69)              | 54<br>(17-100)             | 87<br>(28-164)             |
| Other environmental risks                                                                    | 0<br>(0-0)                 | 0<br>(0-0)                 | 326<br>(210-475)           | 455<br>(308-636)           | 557<br>(439-787)           | 831<br>(647-1,170)         | 1,122<br>(911-1,378)       |
| Residential radon                                                                            | 0<br>(0-0)                 | 0<br>(0-0)                 | 11<br>(1-27)               | 20<br>(2-48)               | 40<br>(5-100)              | 88<br>(11-209)             | 154<br>(20-352)            |
| Lead exposure                                                                                | 0<br>(0-0)                 | 0<br>(0-0)                 | 315<br>(200-466)           | 436<br>(291-615)           | 517<br>(405-743)           | 743<br>(583-1,064)         | 968<br>(797-1,158)         |
| Child and maternal undernutrition                                                            | 3,151<br>(2,247-4,367)     | 3,387<br>(2,464-4,535)     | 2,862<br>(2,093-3,837)     | 2,381<br>(1,726-3,207)     | 2,099<br>(1,509-2,830)     | 1,737<br>(1,249-2,395)     | 1,380<br>(976-1,933)       |
| Suboptimal breastfeeding                                                                     | 0<br>(0-0)                 |
| Non-exclusive breastfeeding                                                                  | 0<br>(0-0)                 |
| Discontinued breastfeeding                                                                   | 0<br>(0-0)                 |
| Childhood underweight                                                                        | 0<br>(0-0)                 |
| Iron deficiency                                                                              | 3,151<br>(2,247-4,367)     | 3,387<br>(2,464-4,535)     | 2,862<br>(2,093-3,837)     | 2,381<br>(1,726-3,207)     | 2,099<br>(1,509-2,830)     | 1,737<br>(1,249-2,395)     | 1,380<br>(976-1,933)       |
| Vitamin A deficiency                                                                         | 0<br>(0-0)                 |
| Zinc deficiency                                                                              | 0<br>(0-0)                 |
| Tobacco smoking, including second-hand smoke                                                 | 0<br>(0-0)                 | 0<br>(0-0)                 | 179<br>(121-237)           | 3,227<br>(2,489-4,466)     | 5,265<br>(3,703-7,028)     | 9,390<br>(7,467-11,508)    | 12,619<br>(10,798-14,465)  |
| Tobacco smoking                                                                              | 0<br>(0-0)                 | 0<br>(0-0)                 | 0<br>(0-0)                 | 2,997<br>(2,263-4,240)     | 4,986<br>(3,409-6,735)     | 8,979<br>(7,027-11,103)    | 12,032<br>(10,203-13,935)  |
| Second-hand smoke                                                                            | 0<br>(0-0)                 | 0<br>(0-0)                 | 179<br>(121-237)           | 230<br>(159-301)           | 280<br>(190-365)           | 411<br>(279-543)           | 587<br>(394-768)           |
| Alcohol and drug use                                                                         | 6,298<br>(5,275-7,426)     | 11,774<br>(9,862-13,798)   | 12,218<br>(10,370-14,182)  | 10,290<br>(8,805-11,877)   | 11,415<br>(9,932-13,084)   | 11,132<br>(9,853-12,582)   | 11,297<br>(10,082-12,676)  |
| Alcohol use                                                                                  | 4,638<br>(3,907-5,475)     | 7,124<br>(6,012-8,308)     | 7,220<br>(6,154-8,337)     | 6,609<br>(5,725-7,597)     | 8,683<br>(7,588-10,000)    | 9,165<br>(8,090-10,455)    | 9,952<br>(8,855-11,138)    |

| Web table 3: Global DALYs (in thousands) attributable to risk factors by age and sex in 2010 |                            |                            |                            |                            |                            |                            |                            |
|----------------------------------------------------------------------------------------------|----------------------------|----------------------------|----------------------------|----------------------------|----------------------------|----------------------------|----------------------------|
| Risk                                                                                         | Both Sexes,<br>15-19 Years | Both Sexes,<br>20-24 Years | Both Sexes,<br>25-29 Years | Both Sexes,<br>30-34 Years | Both Sexes,<br>35-39 Years | Both Sexes,<br>40-44 Years | Both Sexes,<br>45-49 Years |
| Drug use                                                                                     | 1,674<br>(1,254–2,172)     | 4,690<br>(3,566–5,877)     | 5,046<br>(3,852–6,317)     | 3,712<br>(2,865–4,624)     | 2,768<br>(2,198–3,410)     | 2,011<br>(1,607–2,448)     | 1,396<br>(1,102–1,745)     |
| Physiological risk factors                                                                   |                            |                            |                            |                            |                            |                            |                            |
| High fasting plasma glucose                                                                  | 0<br>(0–0)                 | 0<br>(0–0)                 | 1,562<br>(1,296–1,863)     | 2,063<br>(1,694–2,483)     | 3,629<br>(3,010–4,311)     | 4,931<br>(4,140–5,943)     | 7,631<br>(6,515–8,862)     |
| High total cholesterol                                                                       | 0<br>(0–0)                 | 0<br>(0–0)                 | 429<br>(290–579)           | 600<br>(397–827)           | 1,342<br>(982–1,744)       | 2,073<br>(1,525–2,697)     | 3,298<br>(2,533–4,129)     |
| High blood pressure                                                                          | 0<br>(0–0)                 | 0<br>(0–0)                 | 2,009<br>(1,582–2,443)     | 2,476<br>(1,951–2,994)     | 4,573<br>(3,813–5,324)     | 6,591<br>(5,463–7,642)     | 11,439<br>(10,064–12,774)  |
| High body-mass index                                                                         | 0<br>(0–0)                 | 0<br>(0–0)                 | 1,884<br>(1,473–2,365)     | 2,389<br>(1,841–2,979)     | 4,383<br>(3,528–5,325)     | 6,220<br>(4,961–7,582)     | 8,934<br>(7,297–10,756)    |
| Low bone mineral density                                                                     | 0<br>(0–0)                 |
| Dietary risk factors and physical inactivity                                                 | 0<br>(0–0)                 | 0<br>(0–0)                 | 3,873<br>(3,453–4,315)     | 5,460<br>(4,903–6,044)     | 8,387<br>(7,612–9,170)     | 13,242<br>(12,013–14,437)  | 18,324<br>(16,698–19,962)  |
| Diet low in fruits                                                                           | 0<br>(0–0)                 | 0<br>(0–0)                 | 1,852<br>(1,436–2,249)     | 2,508<br>(1,931–3,047)     | 3,805<br>(2,945–4,599)     | 6,140<br>(4,772–7,365)     | 8,497<br>(6,516–10,132)    |
| Diet low in vegetables                                                                       | 0<br>(0–0)                 | 0<br>(0–0)                 | 922<br>(596–1,225)         | 1,191<br>(792–1,578)       | 1,675<br>(1,071–2,244)     | 2,500<br>(1,616–3,328)     | 3,334<br>(2,143–4,418)     |
| Diet low in whole grains                                                                     | 0<br>(0–0)                 | 0<br>(0–0)                 | 975<br>(763–1,183)         | 1,317<br>(1,010–1,599)     | 1,906<br>(1,485–2,308)     | 2,846<br>(2,227–3,408)     | 3,606<br>(2,841–4,332)     |
| Diet low in nuts and seeds                                                                   | 0<br>(0–0)                 | 0<br>(0–0)                 | 992<br>(667–1,268)         | 1,396<br>(931–1,796)       | 2,025<br>(1,351–2,642)     | 3,147<br>(2,113–4,041)     | 4,142<br>(2,712–5,373)     |
| Diet low in milk                                                                             | 0<br>(0–0)                 | 0<br>(0–0)                 | 36<br>(10–63)              | 50<br>(15–86)              | 76<br>(20–131)             | 111<br>(31–189)            | 161<br>(47–281)            |
| Diet high in red meat                                                                        | 0<br>(0–0)                 | 0<br>(0–0)                 | 51<br>(20–90)              | 78<br>(30–135)             | 123<br>(48–214)            | 167<br>(64–288)            | 196<br>(81–331)            |
| Diet high in processed meat                                                                  | 0<br>(0–0)                 | 0<br>(0–0)                 | 506<br>(203–813)           | 719<br>(295–1,146)         | 1,002<br>(410–1,623)       | 1,485<br>(554–2,449)       | 1,941<br>(701–3,157)       |
| Diet high in sugar-sweetened beverages                                                       | 0<br>(0–0)                 | 0<br>(0–0)                 | 186<br>(112–275)           | 227<br>(137–314)           | 271<br>(110–457)           | 377<br>(141–659)           | 449<br>(169–732)           |
| Diet low in fibre                                                                            | 0<br>(0–0)                 | 0<br>(0–0)                 | 402<br>(178–628)           | 546<br>(243–845)           | 798<br>(343–1,231)         | 1,185<br>(523–1,851)       | 1,529<br>(682–2,419)       |
| Diet low in calcium                                                                          | 0<br>(0–0)                 | 0<br>(0–0)                 | 46<br>(33–62)              | 62<br>(45–82)              | 93<br>(67–125)             | 134<br>(98–179)            | 189<br>(139–251)           |
| Diet low in seafood omega-3 fatty acids                                                      | 0<br>(0–0)                 | 0<br>(0–0)                 | 605<br>(428–776)           | 840<br>(588–1,099)         | 1,201<br>(839–1,554)       | 1,873<br>(1,385–2,433)     | 2,430<br>(1,740–3,147)     |
| Diet low in polyunsaturated fatty acids                                                      | 0<br>(0–0)                 | 0<br>(0–0)                 | 280<br>(135–431)           | 381<br>(178–577)           | 532<br>(252–810)           | 794<br>(377–1,222)         | 1,022<br>(466–1,554)       |
| Diet high in trans fatty acids                                                               | 0<br>(0–0)                 | 0<br>(0–0)                 | 300<br>(216–389)           | 409<br>(287–526)           | 561<br>(402–721)           | 840<br>(601–1,081)         | 1,080<br>(759–1,379)       |
| Diet high in sodium                                                                          | 0<br>(0–0)                 | 0<br>(0–0)                 | 680<br>(348–992)           | 1,036<br>(647–1,401)       | 1,693<br>(1,072–2,319)     | 2,918<br>(1,883–3,919)     | 4,139<br>(2,748–5,481)     |
| Physical inactivity and low physical activity                                                | 0<br>(0–0)                 | 0<br>(0–0)                 | 1,354<br>(1,104–1,619)     | 1,900<br>(1,579–2,269)     | 2,805<br>(2,322–3,308)     | 4,132<br>(3,427–4,904)     | 5,428<br>(4,592–6,310)     |
| Occupational risk factors                                                                    | 3,629<br>(2,835–4,631)     | 6,105<br>(4,799–7,729)     | 6,918<br>(5,333–8,727)     | 6,612<br>(5,220–8,223)     | 6,590<br>(5,143–8,276)     | 6,451<br>(5,018–8,167)     | 6,034<br>(4,657–7,539)     |

| Web table 3: Global DALYs (in thousands) attributable to risk factors by age and sex in 2010 |                            |                            |                            |                            |                            |                            |                            |
|----------------------------------------------------------------------------------------------|----------------------------|----------------------------|----------------------------|----------------------------|----------------------------|----------------------------|----------------------------|
| Risk                                                                                         | Both Sexes,<br>15-19 Years | Both Sexes,<br>20-24 Years | Both Sexes,<br>25-29 Years | Both Sexes,<br>30-34 Years | Both Sexes,<br>35-39 Years | Both Sexes,<br>40-44 Years | Both Sexes,<br>45-49 Years |
| Occupational carcinogens                                                                     | 17<br>(11-24)              | 26<br>(16-40)              | 32<br>(19-47)              | 37<br>(24-54)              | 56<br>(36-80)              | 105<br>(70-151)            | 194<br>(127-272)           |
| Occupational exposure to asbestos                                                            | 7<br>(4-10)                | 8<br>(4-11)                | 8<br>(4-11)                | 9<br>(5-12)                | 12<br>(7-16)               | 21<br>(13-29)              | 40<br>(23-53)              |
| Occupational exposure to arsenic                                                             | 0<br>(0-0)                 | 0<br>(0-0)                 | 0<br>(0-0)                 | 0<br>(0-1)                 | 1<br>(0-2)                 | 2<br>(1-5)                 | 5<br>(2-9)                 |
| Occupational exposure to benzene                                                             | 8<br>(3-15)                | 16<br>(7-28)               | 14<br>(6-25)               | 12<br>(5-21)               | 6<br>(2-11)                | 6<br>(3-11)                | 3<br>(1-5)                 |
| Occupational exposure to beryllium                                                           | 0<br>(0-0)                 | 0<br>(0-0)                 | 0<br>(0-0)                 | 0<br>(0-0)                 | 0<br>(0-0)                 | 0<br>(0-0)                 | 0<br>(0-1)                 |
| Occupational exposure to cadmium                                                             | 0<br>(0-0)                 | 0<br>(0-0)                 | 0<br>(0-0)                 | 0<br>(0-0)                 | 0<br>(0-0)                 | 1<br>(0-1)                 | 2<br>(0-2)                 |
| Occupational exposure to chromium                                                            | 0<br>(0-0)                 | 0<br>(0-0)                 | 0<br>(0-0)                 | 0<br>(0-1)                 | 1<br>(0-1)                 | 2<br>(1-3)                 | 4<br>(2-5)                 |
| Occupational exposure to diesel engine exhaust                                               | 0<br>(0-0)                 | 0<br>(0-0)                 | 2<br>(1-3)                 | 4<br>(2-6)                 | 10<br>(5-15)               | 20<br>(11-31)              | 40<br>(23-61)              |
| Occupational exposure to second-hand smoke                                                   | 0<br>(0-0)                 | 0<br>(0-0)                 | 2<br>(1-4)                 | 4<br>(3-6)                 | 11<br>(7-15)               | 23<br>(16-31)              | 45<br>(31-60)              |
| Occupational exposure to formaldehyde                                                        | 2<br>(1-3)                 | 3<br>(1-6)                 | 3<br>(1-6)                 | 3<br>(1-6)                 | 2<br>(1-4)                 | 2<br>(1-5)                 | 1<br>(0-3)                 |
| Occupational exposure to nickel                                                              | 0<br>(0-0)                 | 0<br>(0-0)                 | 1<br>(0-2)                 | 2<br>(0-3)                 | 4<br>(1-9)                 | 8<br>(2-18)                | 17<br>(4-35)               |
| Occupational exposure to polycyclic aromatic hydrocarbons                                    | 0<br>(0-0)                 | 0<br>(0-0)                 | 0<br>(0-1)                 | 1<br>(0-1)                 | 2<br>(1-3)                 | 4<br>(2-6)                 | 7<br>(3-12)                |
| Occupational exposure to silica                                                              | 0<br>(0-0)                 | 0<br>(0-0)                 | 1<br>(1-2)                 | 3<br>(2-4)                 | 7<br>(4-10)                | 14<br>(9-20)               | 29<br>(18-40)              |
| Occupational exposure to sulfuric acid                                                       | 0<br>(0-0)                 | 0<br>(0-0)                 | 0<br>(0-0)                 | 0<br>(0-1)                 | 1<br>(0-3)                 | 4<br>(1-8)                 | 7<br>(2-17)                |
| Occupational asthmagens                                                                      | 172<br>(111-254)           | 199<br>(134-284)           | 186<br>(129-263)           | 159<br>(110-225)           | 165<br>(116-236)           | 169<br>(122-249)           | 188<br>(132-281)           |
| Occupational particulate matter, gases, and fumes                                            | 0<br>(0-0)                 | 0<br>(0-0)                 | 437<br>(202-718)           | 495<br>(222-810)           | 605<br>(285-975)           | 721<br>(339-1,161)         | 856<br>(412-1,336)         |
| Occupational noise                                                                           | 149<br>(80-253)            | 248<br>(137-415)           | 316<br>(181-527)           | 371<br>(216-610)           | 352<br>(208-581)           | 387<br>(230-630)           | 382<br>(228-618)           |
| Occupational risk factors for injuries                                                       | 2,201<br>(1,638-3,082)     | 3,913<br>(2,892-5,394)     | 3,987<br>(2,915-5,476)     | 3,369<br>(2,460-4,617)     | 2,868<br>(2,061-3,918)     | 2,347<br>(1,680-3,282)     | 1,818<br>(1,290-2,573)     |
| Occupational low back pain                                                                   | 1,090<br>(696-1,585)       | 1,719<br>(1,133-2,449)     | 1,960<br>(1,309-2,759)     | 2,180<br>(1,463-3,059)     | 2,544<br>(1,709-3,564)     | 2,721<br>(1,827-3,846)     | 2,596<br>(1,748-3,703)     |
| Sexual abuse and violence                                                                    | 2,774<br>(1,968-3,970)     | 3,384<br>(2,497-4,588)     | 2,974<br>(2,203-3,882)     | 2,536<br>(1,942-3,286)     | 2,368<br>(1,763-3,095)     | 2,142<br>(1,591-2,857)     | 1,829<br>(1,355-2,429)     |
| Childhood sexual abuse                                                                       | 997<br>(720-1,351)         | 1,084<br>(790-1,449)       | 924<br>(686-1,229)         | 784<br>(583-1,025)         | 735<br>(556-956)           | 693<br>(525-900)           | 626<br>(477-800)           |
| Intimate partner violence                                                                    | 1,954<br>(1,136-3,109)     | 2,477<br>(1,635-3,546)     | 2,194<br>(1,476-3,033)     | 1,868<br>(1,310-2,597)     | 1,740<br>(1,186-2,421)     | 1,546<br>(1,029-2,219)     | 1,283<br>(834-1,844)       |



**Web table 3: Global DALYs (in thousands) attributable to risk factors by age and sex in 2010**

| Risk                                         | Both Sexes,<br>50-54 Years | Both Sexes,<br>55-59 Years | Both Sexes,<br>60-64 Years | Both Sexes,<br>65-69 Years | Both Sexes,<br>70-74 Years | Both Sexes,<br>75-79 Years | Both Sexes,<br>80+ Years |
|----------------------------------------------|----------------------------|----------------------------|----------------------------|----------------------------|----------------------------|----------------------------|--------------------------|
| Unimproved water and sanitation              | 313<br>(13-625)            | 320<br>(12-636)            | 351<br>(13-723)            | 314<br>(11-642)            | 303<br>(12-619)            | 203<br>(7-415)             | 181<br>(7-380)           |
| Unimproved water source                      | 98<br>(7-205)              | 95<br>(6-200)              | 102<br>(7-217)             | 92<br>(6-197)              | 83<br>(5-181)              | 57<br>(4-124)              | 49<br>(3-107)            |
| Unimproved sanitation                        | 233<br>(6-483)             | 243<br>(6-500)             | 269<br>(7-570)             | 240<br>(6-505)             | 236<br>(6-508)             | 157<br>(3-333)             | 141<br>(4-296)           |
| Air pollution                                |                            |                            |                            |                            |                            |                            |                          |
| Ambient particulate matter pollution         | 6,786<br>(5,044-8,392)     | 8,383<br>(6,291-10,400)    | 8,354<br>(6,322-10,185)    | 7,722<br>(5,626-9,614)     | 7,670<br>(5,456-9,640)     | 5,931<br>(4,275-7,316)     | 5,719<br>(4,199-7,096)   |
| Household air pollution from solid fuels     | 7,222<br>(5,043-9,671)     | 8,812<br>(6,002-12,085)    | 8,982<br>(6,332-11,790)    | 8,748<br>(5,963-11,784)    | 8,338<br>(5,626-11,358)    | 6,144<br>(4,213-8,346)     | 5,119<br>(3,451-7,114)   |
| Ambient ozone pollution                      | 149<br>(51-270)            | 242<br>(82-421)            | 324<br>(111-574)           | 392<br>(129-693)           | 426<br>(149-744)           | 350<br>(116-620)           | 350<br>(119-619)         |
| Other environmental risks                    | 1,610<br>(1,288-2,023)     | 2,024<br>(1,590-2,548)     | 2,101<br>(1,653-2,626)     | 2,031<br>(1,644-2,504)     | 1,990<br>(1,633-2,436)     | 1,547<br>(1,288-1,851)     | 1,434<br>(1,220-1,672)   |
| Residential radon                            | 247<br>(32-544)            | 343<br>(44-785)            | 348<br>(44-774)            | 306<br>(39-667)            | 271<br>(36-586)            | 181<br>(25-398)            | 106<br>(15-223)          |
| Lead exposure                                | 1,363<br>(1,128-1,641)     | 1,681<br>(1,408-1,995)     | 1,753<br>(1,467-2,062)     | 1,725<br>(1,446-2,021)     | 1,720<br>(1,445-1,998)     | 1,366<br>(1,161-1,582)     | 1,328<br>(1,135-1,528)   |
| Child and maternal undernutrition            | 1,153<br>(792-1,635)       | 954<br>(657-1,340)         | 760<br>(531-1,070)         | 583<br>(414-822)           | 487<br>(346-686)           | 381<br>(271-533)           | 366<br>(265-497)         |
| Suboptimal breastfeeding                     | 0<br>(0-0)                 | 0<br>(0-0)                 | 0<br>(0-0)                 | 0<br>(0-0)                 | 0<br>(0-0)                 | 0<br>(0-0)                 | 0<br>(0-0)               |
| Non-exclusive breastfeeding                  | 0<br>(0-0)                 | 0<br>(0-0)                 | 0<br>(0-0)                 | 0<br>(0-0)                 | 0<br>(0-0)                 | 0<br>(0-0)                 | 0<br>(0-0)               |
| Discontinued breastfeeding                   | 0<br>(0-0)                 | 0<br>(0-0)                 | 0<br>(0-0)                 | 0<br>(0-0)                 | 0<br>(0-0)                 | 0<br>(0-0)                 | 0<br>(0-0)               |
| Childhood underweight                        | 0<br>(0-0)                 | 0<br>(0-0)                 | 0<br>(0-0)                 | 0<br>(0-0)                 | 0<br>(0-0)                 | 0<br>(0-0)                 | 0<br>(0-0)               |
| Iron deficiency                              | 1,153<br>(792-1,635)       | 954<br>(657-1,340)         | 760<br>(531-1,070)         | 583<br>(414-822)           | 487<br>(346-686)           | 381<br>(271-533)           | 366<br>(265-497)         |
| Vitamin A deficiency                         | 0<br>(0-0)                 | 0<br>(0-0)                 | 0<br>(0-0)                 | 0<br>(0-0)                 | 0<br>(0-0)                 | 0<br>(0-0)                 | 0<br>(0-0)               |
| Zinc deficiency                              | 0<br>(0-0)                 | 0<br>(0-0)                 | 0<br>(0-0)                 | 0<br>(0-0)                 | 0<br>(0-0)                 | 0<br>(0-0)                 | 0<br>(0-0)               |
| Tobacco smoking, including second-hand smoke | 16,947<br>(14,623-19,292)  | 20,836<br>(17,788-23,293)  | 20,562<br>(17,475-23,109)  | 18,298<br>(15,314-20,405)  | 16,813<br>(13,790-19,020)  | 11,903<br>(9,604-13,608)   | 9,957<br>(8,074-11,511)  |
| Tobacco smoking                              | 16,131<br>(13,788-18,465)  | 19,799<br>(16,822-22,344)  | 19,455<br>(16,411-22,067)  | 17,195<br>(14,247-19,421)  | 15,571<br>(12,468-17,875)  | 10,893<br>(8,571-12,644)   | 8,871<br>(6,929-10,474)  |
| Second-hand smoke                            | 816<br>(558-1,063)         | 1,037<br>(715-1,341)       | 1,107<br>(761-1,431)       | 1,103<br>(744-1,424)       | 1,242<br>(837-1,603)       | 1,011<br>(677-1,331)       | 1,086<br>(722-1,418)     |
| Alcohol and drug use                         | 11,000<br>(9,825-12,183)   | 10,149<br>(9,125-11,220)   | 7,932<br>(7,135-8,752)     | 4,428<br>(3,904-4,969)     | 4,404<br>(3,807-5,013)     | 3,173<br>(2,673-3,656)     | 3,387<br>(2,706-4,029)   |
| Alcohol use                                  | 10,179<br>(9,074-11,317)   | 9,671<br>(8,659-10,698)    | 7,671<br>(6,897-8,488)     | 4,351<br>(3,822-4,890)     | 4,351<br>(3,760-4,961)     | 3,143<br>(2,636-3,625)     | 3,360<br>(2,683-3,990)   |

**Web table 3: Global DALYs (in thousands) attributable to risk factors by age and sex in 2010**

| Risk                                          | Both Sexes,<br>50-54 Years | Both Sexes,<br>55-59 Years | Both Sexes,<br>60-64 Years | Both Sexes,<br>65-69 Years | Both Sexes,<br>70-74 Years | Both Sexes,<br>75-79 Years | Both Sexes,<br>80+ Years  |
|-----------------------------------------------|----------------------------|----------------------------|----------------------------|----------------------------|----------------------------|----------------------------|---------------------------|
| Drug use                                      | 880<br>(715-1,090)         | 539<br>(434-665)           | 313<br>(252-398)           | 78<br>(59-114)             | 53<br>(39-97)              | 31<br>(22-59)              | 28<br>(18-56)             |
| Physiological risk factors                    |                            |                            |                            |                            |                            |                            |                           |
| High fasting plasma glucose                   | 9,324<br>(8,027-10,808)    | 11,995<br>(10,372-13,609)  | 11,585<br>(10,061-13,136)  | 10,839<br>(9,494-12,217)   | 10,417<br>(9,156-11,790)   | 7,782<br>(6,806-8,784)     | 7,253<br>(6,282-8,278)    |
| High total cholesterol                        | 4,394<br>(3,345-5,530)     | 5,372<br>(4,155-6,627)     | 5,348<br>(4,124-6,634)     | 4,843<br>(3,763-5,954)     | 5,174<br>(3,853-6,457)     | 3,854<br>(2,736-5,005)     | 4,172<br>(3,212-5,237)    |
| High blood pressure                           | 14,823<br>(13,013-16,659)  | 21,084<br>(19,044-23,072)  | 21,120<br>(19,137-23,093)  | 22,553<br>(20,599-24,520)  | 23,766<br>(21,749-25,817)  | 20,375<br>(18,721-22,034)  | 22,748<br>(20,806-24,693) |
| High body-mass index                          | 11,008<br>(8,986-13,075)   | 12,211<br>(10,074-14,489)  | 11,895<br>(9,882-14,029)   | 9,832<br>(8,094-11,602)    | 9,966<br>(8,303-11,697)    | 7,297<br>(6,000-8,593)     | 7,591<br>(6,248-8,997)    |
| Low bone mineral density                      | 600<br>(429-783)           | 687<br>(517-871)           | 715<br>(549-908)           | 702<br>(535-883)           | 718<br>(549-909)           | 722<br>(566-899)           | 1,072<br>(862-1,323)      |
| Dietary risk factors and physical inactivity  | 24,898<br>(22,855-26,854)  | 30,539<br>(28,153-32,873)  | 30,850<br>(28,539-33,162)  | 29,683<br>(27,431-32,032)  | 30,858<br>(28,447-33,218)  | 25,140<br>(23,217-26,881)  | 27,628<br>(25,303-29,847) |
| Diet low in fruits                            | 11,582<br>(9,142-13,835)   | 14,028<br>(11,043-16,747)  | 13,359<br>(10,388-15,993)  | 12,436<br>(9,678-15,000)   | 12,144<br>(9,193-14,898)   | 9,324<br>(7,067-11,363)    | 8,420<br>(6,353-10,454)   |
| Diet low in vegetables                        | 4,329<br>(2,838-5,799)     | 4,877<br>(3,263-6,562)     | 4,592<br>(3,091-6,163)     | 4,209<br>(2,807-5,686)     | 4,313<br>(2,864-5,776)     | 3,317<br>(2,208-4,445)     | 3,299<br>(2,189-4,470)    |
| Diet low in whole grains                      | 4,546<br>(3,572-5,435)     | 5,211<br>(4,087-6,224)     | 4,899<br>(3,881-5,812)     | 4,365<br>(3,437-5,236)     | 4,415<br>(3,463-5,284)     | 3,397<br>(2,669-4,076)     | 3,279<br>(2,529-3,931)    |
| Diet low in nuts and seeds                    | 5,544<br>(3,676-7,216)     | 6,463<br>(4,130-8,447)     | 6,247<br>(3,980-8,111)     | 5,699<br>(3,635-7,451)     | 5,851<br>(3,660-7,746)     | 4,571<br>(2,832-6,080)     | 5,212<br>(3,111-7,066)    |
| Diet low in milk                              | 220<br>(64-372)            | 280<br>(82-483)            | 282<br>(81-476)            | 259<br>(79-434)            | 255<br>(75-426)            | 196<br>(57-335)            | 173<br>(51-290)           |
| Diet high in red meat                         | 217<br>(96-353)            | 235<br>(110-377)           | 210<br>(99-331)            | 176<br>(84-273)            | 167<br>(80-259)            | 123<br>(58-190)            | 109<br>(51-169)           |
| Diet high in processed meat                   | 2,455<br>(823-3,973)       | 2,661<br>(861-4,361)       | 2,488<br>(780-4,078)       | 2,123<br>(646-3,488)       | 2,115<br>(613-3,524)       | 1,601<br>(458-2,634)       | 1,843<br>(506-3,105)      |
| Diet high in sugar-sweetened beverages        | 549<br>(194-877)           | 671<br>(221-962)           | 604<br>(205-869)           | 600<br>(414-869)           | 503<br>(345-761)           | 378<br>(255-791)           | 435<br>(217-787)          |
| Diet low in fibre                             | 1,900<br>(832-2,974)       | 2,112<br>(939-3,295)       | 1,907<br>(865-3,008)       | 1,637<br>(730-2,589)       | 1,679<br>(746-2,652)       | 1,322<br>(595-2,080)       | 1,435<br>(631-2,276)      |
| Diet low in calcium                           | 259<br>(192-338)           | 335<br>(243-434)           | 341<br>(249-441)           | 321<br>(231-413)           | 322<br>(226-422)           | 254<br>(175-339)           | 233<br>(150-324)          |
| Diet low in seafood omega-3 fatty acids       | 3,206<br>(2,300-4,121)     | 3,644<br>(2,654-4,639)     | 3,430<br>(2,427-4,388)     | 3,063<br>(2,253-3,925)     | 3,085<br>(2,236-3,949)     | 2,325<br>(1,678-3,011)     | 2,497<br>(1,791-3,230)    |
| Diet low in polyunsaturated fatty acids       | 1,329<br>(602-2,040)       | 1,489<br>(699-2,259)       | 1,405<br>(644-2,155)       | 1,251<br>(578-1,926)       | 1,232<br>(565-1,921)       | 937<br>(435-1,426)         | 1,028<br>(480-1,577)      |
| Diet high in trans fatty acids                | 1,369<br>(975-1,732)       | 1,475<br>(1,059-1,875)     | 1,407<br>(1,010-1,782)     | 1,212<br>(873-1,546)       | 1,140<br>(822-1,462)       | 860<br>(621-1,095)         | 941<br>(677-1,202)        |
| Diet high in sodium                           | 5,934<br>(3,962-7,854)     | 7,658<br>(5,059-10,082)    | 8,098<br>(5,395-10,587)    | 8,074<br>(5,257-10,725)    | 8,183<br>(5,281-10,919)    | 6,407<br>(4,103-8,577)     | 6,411<br>(4,001-8,637)    |
| Physical inactivity and low physical activity | 6,915<br>(5,828-8,064)     | 8,283<br>(6,981-9,618)     | 8,405<br>(7,075-9,796)     | 7,935<br>(6,698-9,208)     | 8,249<br>(6,844-9,675)     | 6,637<br>(5,458-7,867)     | 7,274<br>(5,838-8,669)    |

**Web table 3: Global DALYs (in thousands) attributable to risk factors by age and sex in 2010**

| Risk                                                      | Both Sexes,<br>50-54 Years | Both Sexes,<br>55-59 Years | Both Sexes,<br>60-64 Years | Both Sexes,<br>65-69 Years | Both Sexes,<br>70-74 Years | Both Sexes,<br>75-79 Years | Both Sexes,<br>80+ Years |
|-----------------------------------------------------------|----------------------------|----------------------------|----------------------------|----------------------------|----------------------------|----------------------------|--------------------------|
| Occupational risk factors                                 | 5,638<br>(4,330–7,095)     | 5,154<br>(3,948–6,551)     | 3,868<br>(2,864–4,982)     | 2,141<br>(1,520–2,814)     | 1,940<br>(1,361–2,600)     | 1,286<br>(869–1,775)       | 121<br>(81–161)          |
| Occupational carcinogens                                  | 295<br>(193–422)           | 488<br>(311–710)           | 492<br>(318–694)           | 349<br>(226–482)           | 310<br>(194–431)           | 159<br>(105–215)           | 121<br>(81–161)          |
| Occupational exposure to asbestos                         | 64<br>(36–87)              | 84<br>(48–112)             | 98<br>(59–127)             | 90<br>(54–117)             | 88<br>(52–115)             | 67<br>(41–89)              | 57<br>(36–75)            |
| Occupational exposure to arsenic                          | 7<br>(3–13)                | 13<br>(5–25)               | 13<br>(5–24)               | 8<br>(3–15)                | 7<br>(3–13)                | 3<br>(1–5)                 | 2<br>(1–4)               |
| Occupational exposure to benzene                          | 3<br>(1–5)                 | 4<br>(2–8)                 | 4<br>(2–7)                 | 5<br>(2–9)                 | 5<br>(2–8)                 | 5<br>(2–9)                 | 2<br>(1–4)               |
| Occupational exposure to beryllium                        | 0<br>(0–1)                 | 1<br>(0–1)                 | 1<br>(0–1)                 | 0<br>(0–1)                 | 0<br>(0–1)                 | 0<br>(0–0)                 | 0<br>(0–0)               |
| Occupational exposure to cadmium                          | 2<br>(1–2)                 | 3<br>(1–5)                 | 3<br>(1–4)                 | 2<br>(1–3)                 | 1<br>(1–2)                 | 1<br>(0–1)                 | 0<br>(0–1)               |
| Occupational exposure to chromium                         | 5<br>(3–8)                 | 10<br>(6–14)               | 9<br>(5–14)                | 6<br>(3–9)                 | 5<br>(3–8)                 | 2<br>(1–3)                 | 1<br>(1–2)               |
| Occupational exposure to diesel engine exhaust            | 61<br>(34–94)              | 110<br>(61–171)            | 108<br>(60–165)            | 69<br>(37–104)             | 59<br>(31–91)              | 23<br>(12–36)              | 16<br>(8–25)             |
| Occupational exposure to second-hand smoke                | 68<br>(46–92)              | 120<br>(80–164)            | 117<br>(79–159)            | 74<br>(48–98)              | 64<br>(41–86)              | 25<br>(16–34)              | 18<br>(11–25)            |
| Occupational exposure to formaldehyde                     | 1<br>(0–3)                 | 2<br>(1–4)                 | 1<br>(0–3)                 | 2<br>(1–3)                 | 1<br>(0–2)                 | 1<br>(0–2)                 | 0<br>(0–1)               |
| Occupational exposure to nickel                           | 25<br>(7–51)               | 45<br>(12–95)              | 44<br>(12–92)              | 28<br>(7–56)               | 24<br>(6–50)               | 10<br>(3–20)               | 7<br>(2–15)              |
| Occupational exposure to polycyclic aromatic hydrocarbons | 11<br>(5–18)               | 20<br>(9–34)               | 20<br>(9–33)               | 13<br>(6–20)               | 11<br>(5–18)               | 4<br>(2–7)                 | 3<br>(1–5)               |
| Occupational exposure to silica                           | 44<br>(28–62)              | 81<br>(49–113)             | 79<br>(48–110)             | 51<br>(31–70)              | 44<br>(25–61)              | 18<br>(10–25)              | 12<br>(7–17)             |
| Occupational exposure to sulfuric acid                    | 11<br>(3–25)               | 14<br>(4–31)               | 13<br>(4–28)               | 9<br>(3–19)                | 7<br>(2–15)                | 3<br>(1–6)                 | 2<br>(1–4)               |
| Occupational asthmagens                                   | 192<br>(134–295)           | 193<br>(135–309)           | 155<br>(108–246)           | 95<br>(65–156)             | 85<br>(59–137)             | 61<br>(42–99)              | 0<br>(0–0)               |
| Occupational particulate matter, gases, and fumes         | 1,079<br>(527–1,672)       | 1,307<br>(650–1,995)       | 1,254<br>(581–2,008)       | 842<br>(368–1,363)         | 861<br>(381–1,400)         | 685<br>(312–1,102)         | 0<br>(0–0)               |
| Occupational noise                                        | 425<br>(253–684)           | 292<br>(166–472)           | 273<br>(155–439)           | 112<br>(64–183)            | 116<br>(65–192)            | 28<br>(12–52)              | 0<br>(0–0)               |
| Occupational risk factors for injuries                    | 1,337<br>(957–1,958)       | 906<br>(640–1,314)         | 432<br>(309–613)           | 155<br>(110–227)           | 89<br>(64–128)             | 21<br>(16–31)              | 0<br>(0–0)               |
| Occupational low back pain                                | 2,312<br>(1,544–3,241)     | 1,966<br>(1,316–2,746)     | 1,263<br>(836–1,761)       | 589<br>(380–839)           | 479<br>(310–680)           | 332<br>(214–476)           | 0<br>(0–0)               |
| Sexual abuse and violence                                 | 1,559<br>(1,156–2,108)     | 1,247<br>(907–1,694)       | 858<br>(615–1,164)         | 560<br>(399–764)           | 413<br>(287–571)           | 267<br>(187–372)           | 232<br>(159–332)         |
| Childhood sexual abuse                                    | 539<br>(415–704)           | 419<br>(322–543)           | 275<br>(211–362)           | 164<br>(123–214)           | 108<br>(80–140)            | 64<br>(47–84)              | 46<br>(34–61)            |
| Intimate partner violence                                 | 1,088<br>(694–1,591)       | 881<br>(559–1,282)         | 619<br>(397–915)           | 420<br>(263–616)           | 322<br>(201–475)           | 212<br>(133–311)           | 191<br>(120–287)         |

**Web table 3: Global DALYs (in thousands) attributable to risk factors by age and sex in 2010**

| Risk                                         | Males,<br>All Ages          | Males,<br>0-6 Days     | Males,<br>7-27 Days    | Males,<br>28-364 Days     | Males,<br>1-4 Years       | Males,<br>5-9 Years    | Males,<br>10-14 Years  |
|----------------------------------------------|-----------------------------|------------------------|------------------------|---------------------------|---------------------------|------------------------|------------------------|
| Unimproved water and sanitation              | 11,022<br>(458-21,162)      | 282<br>(11-582)        | 535<br>(22-1,086)      | 3,606<br>(145-7,051)      | 2,894<br>(125-5,657)      | 621<br>(25-1,264)      | 304<br>(13-633)        |
| Unimproved water source                      | 4,080<br>(266-8,172)        | 113<br>(7-239)         | 202<br>(13-419)        | 1,419<br>(92-2,888)       | 1,154<br>(74-2,304)       | 216<br>(14-450)        | 99<br>(6-218)          |
| Unimproved sanitation                        | 7,735<br>(190-15,338)       | 191<br>(5-418)         | 373<br>(9-787)         | 2,462<br>(61-5,034)       | 1,969<br>(48-4,012)       | 447<br>(11-937)        | 223<br>(5-482)         |
| Air pollution                                |                             |                        |                        |                           |                           |                        |                        |
| Ambient particulate matter pollution         | 46,732<br>(41,393-52,602)   | 849<br>(497-1,331)     | 676<br>(416-1,019)     | 2,802<br>(1,853-3,957)    | 1,744<br>(1,101-2,623)    | 0<br>(0-0)             | 0<br>(0-0)             |
| Household air pollution from solid fuels     | 60,170<br>(45,087-75,153)   | 2,885<br>(1,761-4,370) | 2,182<br>(1,428-3,102) | 9,898<br>(6,673-13,353)   | 6,166<br>(4,242-9,078)    | 0<br>(0-0)             | 0<br>(0-0)             |
| Ambient ozone pollution                      | 1,440<br>(506-2,563)        | 0<br>(0-0)             | 0<br>(0-0)             | 0<br>(0-0)                | 0<br>(0-0)                | 0<br>(0-0)             | 0<br>(0-0)             |
| Other environmental risks                    | 9,434<br>(7,476-12,045)     | 0<br>(0-0)             | 0<br>(0-0)             | 0<br>(0-0)                | 2<br>(1-4)                | 7<br>(3-13)            | 5<br>(2-9)             |
| Residential radon                            | 1,514<br>(191-3,383)        | 0<br>(0-0)             | 0<br>(0-0)             | 0<br>(0-0)                | 0<br>(0-0)                | 0<br>(0-0)             | 0<br>(0-0)             |
| Lead exposure                                | 7,920<br>(6,491-9,683)      | 0<br>(0-0)             | 0<br>(0-0)             | 0<br>(0-0)                | 2<br>(1-4)                | 7<br>(3-13)            | 5<br>(2-9)             |
| Child and maternal undernutrition            | 83,202<br>(67,963-99,704)   | 0<br>(0-0)             | 4,319<br>(2,507-6,136) | 35,720<br>(28,074-44,025) | 31,250<br>(25,312-38,390) | 3,656<br>(2,406-5,314) | 2,439<br>(1,603-3,537) |
| Suboptimal breastfeeding                     | 25,572<br>(15,540-37,260)   | 0<br>(0-0)             | 4,318<br>(2,506-6,135) | 19,471<br>(11,387-29,065) | 1,783<br>(171-4,021)      | 0<br>(0-0)             | 0<br>(0-0)             |
| Non-exclusive breastfeeding                  | 22,258<br>(12,464-32,936)   | 0<br>(0-0)             | 4,318<br>(2,506-6,135) | 17,940<br>(9,884-27,008)  | 0<br>(0-0)                | 0<br>(0-0)             | 0<br>(0-0)             |
| Discontinued breastfeeding                   | 3,314<br>(324-7,377)        | 0<br>(0-0)             | 0<br>(0-0)             | 1,532<br>(142-3,512)      | 1,783<br>(171-4,021)      | 0<br>(0-0)             | 0<br>(0-0)             |
| Childhood underweight                        | 41,270<br>(33,478-50,007)   | 0<br>(0-0)             | 0<br>(0-0)             | 21,465<br>(16,932-26,531) | 19,805<br>(15,520-24,962) | 0<br>(0-0)             | 0<br>(0-0)             |
| Iron deficiency                              | 19,974<br>(13,595-28,289)   | 0<br>(0-0)             | 1<br>(1-1)             | 2,025<br>(1,418-2,808)    | 6,036<br>(4,082-8,602)    | 3,656<br>(2,406-5,314) | 2,439<br>(1,603-3,537) |
| Vitamin A deficiency                         | 5,672<br>(2,904-9,348)      | 0<br>(0-0)             | 0<br>(0-0)             | 1,341<br>(604-2,344)      | 4,331<br>(2,283-7,091)    | 0<br>(0-0)             | 0<br>(0-0)             |
| Zinc deficiency                              | 4,880<br>(1,203-9,316)      | 0<br>(0-0)             | 0<br>(0-0)             | 0<br>(0-0)                | 4,880<br>(1,203-9,316)    | 0<br>(0-0)             | 0<br>(0-0)             |
| Tobacco smoking, including second-hand smoke | 115,496<br>(98,595-130,090) | 787<br>(488-1,207)     | 629<br>(396-904)       | 2,923<br>(1,957-4,030)    | 1,669<br>(1,080-2,407)    | 0<br>(0-0)             | 0<br>(0-0)             |
| Tobacco smoking                              | 105,635<br>(88,332-120,347) | 0<br>(0-0)             | 0<br>(0-0)             | 0<br>(0-0)                | 0<br>(0-0)                | 0<br>(0-0)             | 0<br>(0-0)             |
| Second-hand smoke                            | 9,861<br>(7,669-12,312)     | 787<br>(488-1,207)     | 629<br>(396-904)       | 2,923<br>(1,957-4,030)    | 1,669<br>(1,080-2,407)    | 0<br>(0-0)             | 0<br>(0-0)             |
| Alcohol and drug use                         | 90,578<br>(79,476-101,772)  | 29<br>(20-54)          | 25<br>(13-48)          | 140<br>(80-270)           | 361<br>(229-577)          | 136<br>(105-188)       | 373<br>(285-476)       |
| Alcohol use                                  | 74,662<br>(65,764-83,831)   | 10<br>(6-19)           | 6<br>(3-12)            | 51<br>(34-87)             | 257<br>(153-449)          | 108<br>(82-149)        | 294<br>(226-373)       |

**Web table 3: Global DALYs (in thousands) attributable to risk factors by age and sex in 2010**

| Risk                                          | Males,<br>All Ages           | Males,<br>0-6 Days | Males,<br>7-27 Days | Males,<br>28-364 Days | Males,<br>1-4 Years | Males,<br>5-9 Years | Males,<br>10-14 Years |
|-----------------------------------------------|------------------------------|--------------------|---------------------|-----------------------|---------------------|---------------------|-----------------------|
| Drug use                                      | 16,248<br>(12,679–20,132)    | 19<br>(9–39)       | 20<br>(9–42)        | 88<br>(35–216)        | 104<br>(40–191)     | 28<br>(15–58)       | 79<br>(50–119)        |
| Physiological risk factors                    |                              |                    |                     |                       |                     |                     |                       |
| High fasting plasma glucose                   | 49,148<br>(41,619–57,197)    | 0<br>(0–0)         | 0<br>(0–0)          | 0<br>(0–0)            | 0<br>(0–0)          | 0<br>(0–0)          | 0<br>(0–0)            |
| High total cholesterol                        | 23,179<br>(17,148–29,650)    | 0<br>(0–0)         | 0<br>(0–0)          | 0<br>(0–0)            | 0<br>(0–0)          | 0<br>(0–0)          | 0<br>(0–0)            |
| High blood pressure                           | 99,566<br>(88,193–110,943)   | 0<br>(0–0)         | 0<br>(0–0)          | 0<br>(0–0)            | 0<br>(0–0)          | 0<br>(0–0)          | 0<br>(0–0)            |
| High body-mass index                          | 48,310<br>(39,429–57,750)    | 0<br>(0–0)         | 0<br>(0–0)          | 0<br>(0–0)            | 0<br>(0–0)          | 0<br>(0–0)          | 0<br>(0–0)            |
| Low bone mineral density                      | 3,105<br>(2,295–3,831)       | 0<br>(0–0)         | 0<br>(0–0)          | 0<br>(0–0)            | 0<br>(0–0)          | 0<br>(0–0)          | 0<br>(0–0)            |
| Dietary risk factors and physical inactivity  | 146,574<br>(135,045–157,419) | 0<br>(0–0)         | 0<br>(0–0)          | 0<br>(0–0)            | 0<br>(0–0)          | 0<br>(0–0)          | 0<br>(0–0)            |
| Diet low in fruits                            | 65,523<br>(51,056–78,959)    | 0<br>(0–0)         | 0<br>(0–0)          | 0<br>(0–0)            | 0<br>(0–0)          | 0<br>(0–0)          | 0<br>(0–0)            |
| Diet low in vegetables                        | 24,169<br>(16,503–32,480)    | 0<br>(0–0)         | 0<br>(0–0)          | 0<br>(0–0)            | 0<br>(0–0)          | 0<br>(0–0)          | 0<br>(0–0)            |
| Diet low in whole grains                      | 24,881<br>(19,486–29,709)    | 0<br>(0–0)         | 0<br>(0–0)          | 0<br>(0–0)            | 0<br>(0–0)          | 0<br>(0–0)          | 0<br>(0–0)            |
| Diet low in nuts and seeds                    | 32,615<br>(21,258–41,958)    | 0<br>(0–0)         | 0<br>(0–0)          | 0<br>(0–0)            | 0<br>(0–0)          | 0<br>(0–0)          | 0<br>(0–0)            |
| Diet low in milk                              | 1,171<br>(350–1,977)         | 0<br>(0–0)         | 0<br>(0–0)          | 0<br>(0–0)            | 0<br>(0–0)          | 0<br>(0–0)          | 0<br>(0–0)            |
| Diet high in red meat                         | 1,026<br>(484–1,629)         | 0<br>(0–0)         | 0<br>(0–0)          | 0<br>(0–0)            | 0<br>(0–0)          | 0<br>(0–0)          | 0<br>(0–0)            |
| Diet high in processed meat                   | 12,901<br>(4,012–21,421)     | 0<br>(0–0)         | 0<br>(0–0)          | 0<br>(0–0)            | 0<br>(0–0)          | 0<br>(0–0)          | 0<br>(0–0)            |
| Diet high in sugar-sweetened beverages        | 3,142<br>(1,755–4,330)       | 0<br>(0–0)         | 0<br>(0–0)          | 0<br>(0–0)            | 0<br>(0–0)          | 0<br>(0–0)          | 0<br>(0–0)            |
| Diet low in fibre                             | 10,893<br>(4,903–17,191)     | 0<br>(0–0)         | 0<br>(0–0)          | 0<br>(0–0)            | 0<br>(0–0)          | 0<br>(0–0)          | 0<br>(0–0)            |
| Diet low in calcium                           | 1,570<br>(1,113–2,058)       | 0<br>(0–0)         | 0<br>(0–0)          | 0<br>(0–0)            | 0<br>(0–0)          | 0<br>(0–0)          | 0<br>(0–0)            |
| Diet low in seafood omega-3 fatty acids       | 18,300<br>(13,267–23,201)    | 0<br>(0–0)         | 0<br>(0–0)          | 0<br>(0–0)            | 0<br>(0–0)          | 0<br>(0–0)          | 0<br>(0–0)            |
| Diet low in polyunsaturated fatty acids       | 7,521<br>(3,455–11,583)      | 0<br>(0–0)         | 0<br>(0–0)          | 0<br>(0–0)            | 0<br>(0–0)          | 0<br>(0–0)          | 0<br>(0–0)            |
| Diet high in trans fatty acids                | 7,339<br>(5,240–9,300)       | 0<br>(0–0)         | 0<br>(0–0)          | 0<br>(0–0)            | 0<br>(0–0)          | 0<br>(0–0)          | 0<br>(0–0)            |
| Diet high in sodium                           | 37,378<br>(24,639–49,428)    | 0<br>(0–0)         | 0<br>(0–0)          | 0<br>(0–0)            | 0<br>(0–0)          | 0<br>(0–0)          | 0<br>(0–0)            |
| Physical inactivity and low physical activity | 37,007<br>(30,583–43,466)    | 0<br>(0–0)         | 0<br>(0–0)          | 0<br>(0–0)            | 0<br>(0–0)          | 0<br>(0–0)          | 0<br>(0–0)            |

**Web table 3: Global DALYs (in thousands) attributable to risk factors by age and sex in 2010**

| Risk                                                      | Males,<br>All Ages        | Males,<br>0-6 Days | Males,<br>7-27 Days | Males,<br>28-364 Days | Males,<br>1-4 Years | Males,<br>5-9 Years | Males,<br>10-14 Years |
|-----------------------------------------------------------|---------------------------|--------------------|---------------------|-----------------------|---------------------|---------------------|-----------------------|
| Occupational risk factors                                 | 48,317<br>(38,407–58,677) | 0<br>(0–0)         | 0<br>(0–0)          | 0<br>(0–0)            | 0<br>(0–0)          | 0<br>(0–0)          | 0<br>(0–0)            |
| Occupational carcinogens                                  | 2,087<br>(1,315–2,928)    | 0<br>(0–0)         | 0<br>(0–0)          | 0<br>(0–0)            | 0<br>(0–0)          | 0<br>(0–0)          | 0<br>(0–0)            |
| Occupational exposure to asbestos                         | 521<br>(279–709)          | 0<br>(0–0)         | 0<br>(0–0)          | 0<br>(0–0)            | 0<br>(0–0)          | 0<br>(0–0)          | 0<br>(0–0)            |
| Occupational exposure to arsenic                          | 45<br>(17–84)             | 0<br>(0–0)         | 0<br>(0–0)          | 0<br>(0–0)            | 0<br>(0–0)          | 0<br>(0–0)          | 0<br>(0–0)            |
| Occupational exposure to benzene                          | 52<br>(21–92)             | 0<br>(0–0)         | 0<br>(0–0)          | 0<br>(0–0)            | 0<br>(0–0)          | 0<br>(0–0)          | 0<br>(0–0)            |
| Occupational exposure to beryllium                        | 3<br>(1–5)                | 0<br>(0–0)         | 0<br>(0–0)          | 0<br>(0–0)            | 0<br>(0–0)          | 0<br>(0–0)          | 0<br>(0–0)            |
| Occupational exposure to cadmium                          | 10<br>(4–16)              | 0<br>(0–0)         | 0<br>(0–0)          | 0<br>(0–0)            | 0<br>(0–0)          | 0<br>(0–0)          | 0<br>(0–0)            |
| Occupational exposure to chromium                         | 32<br>(17–48)             | 0<br>(0–0)         | 0<br>(0–0)          | 0<br>(0–0)            | 0<br>(0–0)          | 0<br>(0–0)          | 0<br>(0–0)            |
| Occupational exposure to diesel engine exhaust            | 442<br>(232–682)          | 0<br>(0–0)         | 0<br>(0–0)          | 0<br>(0–0)            | 0<br>(0–0)          | 0<br>(0–0)          | 0<br>(0–0)            |
| Occupational exposure to second-hand smoke                | 405<br>(244–544)          | 0<br>(0–0)         | 0<br>(0–0)          | 0<br>(0–0)            | 0<br>(0–0)          | 0<br>(0–0)          | 0<br>(0–0)            |
| Occupational exposure to formaldehyde                     | 17<br>(6–31)              | 0<br>(0–0)         | 0<br>(0–0)          | 0<br>(0–0)            | 0<br>(0–0)          | 0<br>(0–0)          | 0<br>(0–0)            |
| Occupational exposure to nickel                           | 151<br>(38–312)           | 0<br>(0–0)         | 0<br>(0–0)          | 0<br>(0–0)            | 0<br>(0–0)          | 0<br>(0–0)          | 0<br>(0–0)            |
| Occupational exposure to polycyclic aromatic hydrocarbons | 73<br>(33–119)            | 0<br>(0–0)         | 0<br>(0–0)          | 0<br>(0–0)            | 0<br>(0–0)          | 0<br>(0–0)          | 0<br>(0–0)            |
| Occupational exposure to silica                           | 333<br>(199–463)          | 0<br>(0–0)         | 0<br>(0–0)          | 0<br>(0–0)            | 0<br>(0–0)          | 0<br>(0–0)          | 0<br>(0–0)            |
| Occupational exposure to sulfuric acid                    | 66<br>(19–143)            | 0<br>(0–0)         | 0<br>(0–0)          | 0<br>(0–0)            | 0<br>(0–0)          | 0<br>(0–0)          | 0<br>(0–0)            |
| Occupational asthmagens                                   | 1,359<br>(917–2,153)      | 0<br>(0–0)         | 0<br>(0–0)          | 0<br>(0–0)            | 0<br>(0–0)          | 0<br>(0–0)          | 0<br>(0–0)            |
| Occupational particulate matter, gases, and fumes         | 6,682<br>(3,293–10,311)   | 0<br>(0–0)         | 0<br>(0–0)          | 0<br>(0–0)            | 0<br>(0–0)          | 0<br>(0–0)          | 0<br>(0–0)            |
| Occupational noise                                        | 2,284<br>(1,348–3,649)    | 0<br>(0–0)         | 0<br>(0–0)          | 0<br>(0–0)            | 0<br>(0–0)          | 0<br>(0–0)          | 0<br>(0–0)            |
| Occupational risk factors for injuries                    | 22,434<br>(16,711–29,943) | 0<br>(0–0)         | 0<br>(0–0)          | 0<br>(0–0)            | 0<br>(0–0)          | 0<br>(0–0)          | 0<br>(0–0)            |
| Occupational low back pain                                | 13,471<br>(8,968–18,945)  | 0<br>(0–0)         | 0<br>(0–0)          | 0<br>(0–0)            | 0<br>(0–0)          | 0<br>(0–0)          | 0<br>(0–0)            |
| Sexual abuse and violence                                 | 3,588<br>(2,669–4,679)    | 0<br>(0–0)         | 0<br>(0–0)          | 0<br>(0–0)            | 0<br>(0–0)          | 11<br>(8–16)        | 117<br>(84–158)       |
| Childhood sexual abuse                                    | 3,588<br>(2,669–4,679)    | 0<br>(0–0)         | 0<br>(0–0)          | 0<br>(0–0)            | 0<br>(0–0)          | 11<br>(8–16)        | 117<br>(84–158)       |
| Intimate partner violence                                 | 0<br>(0–0)                | 0<br>(0–0)         | 0<br>(0–0)          | 0<br>(0–0)            | 0<br>(0–0)          | 0<br>(0–0)          | 0<br>(0–0)            |

**Web table 3: Global DALYs (in thousands) attributable to risk factors by age and sex in 2010**

| Risk                                         | Males,<br>15-19 Years  | Males,<br>20-24 Years   | Males,<br>25-29 Years   | Males,<br>30-34 Years  | Males,<br>35-39 Years   | Males,<br>40-44 Years   | Males,<br>45-49 Years    |
|----------------------------------------------|------------------------|-------------------------|-------------------------|------------------------|-------------------------|-------------------------|--------------------------|
| Unimproved water and sanitation              | 309<br>(11-664)        | 312<br>(12-638)         | 310<br>(12-638)         | 276<br>(11-559)        | 241<br>(9-485)          | 201<br>(7-422)          | 190<br>(6-395)           |
| Unimproved water source                      | 102<br>(6-229)         | 105<br>(6-227)          | 105<br>(6-229)          | 92<br>(6-193)          | 78<br>(5-163)           | 63<br>(4-137)           | 58<br>(4-123)            |
| Unimproved sanitation                        | 226<br>(5-498)         | 226<br>(5-464)          | 224<br>(5-480)          | 201<br>(5-418)         | 178<br>(4-372)          | 150<br>(3-321)          | 142<br>(3-311)           |
| Air pollution                                |                        |                         |                         |                        |                         |                         |                          |
| Ambient particulate matter pollution         | 0<br>(0-0)             | 0<br>(0-0)              | 860<br>(613-1,114)      | 1,162<br>(838-1,509)   | 1,730<br>(1,259-2,205)  | 2,730<br>(2,019-3,419)  | 3,408<br>(2,512-4,341)   |
| Household air pollution from solid fuels     | 0<br>(0-0)             | 0<br>(0-0)              | 1,024<br>(666-1,464)    | 1,333<br>(872-1,867)   | 1,839<br>(1,233-2,544)  | 2,751<br>(1,835-3,749)  | 3,266<br>(2,215-4,527)   |
| Ambient ozone pollution                      | 0<br>(0-0)             | 0<br>(0-0)              | 12<br>(3-27)            | 14<br>(4-30)           | 21<br>(7-43)            | 33<br>(10-66)           | 53<br>(18-109)           |
| Other environmental risks                    | 0<br>(0-0)             | 0<br>(0-0)              | 135<br>(101-218)        | 205<br>(159-328)       | 327<br>(257-438)        | 498<br>(388-695)        | 725<br>(568-918)         |
| Residential radon                            | 0<br>(0-0)             | 0<br>(0-0)              | 7<br>(1-18)             | 12<br>(1-31)           | 26<br>(3-62)            | 57<br>(6-135)           | 105<br>(13-243)          |
| Lead exposure                                | 0<br>(0-0)             | 0<br>(0-0)              | 128<br>(95-212)         | 193<br>(148-314)       | 302<br>(235-407)        | 441<br>(351-597)        | 620<br>(493-764)         |
| Child and maternal undernutrition            | 987<br>(665-1,412)     | 710<br>(492-994)        | 563<br>(397-783)        | 500<br>(353-699)       | 474<br>(331-671)        | 425<br>(291-599)        | 408<br>(281-574)         |
| Suboptimal breastfeeding                     | 0<br>(0-0)             | 0<br>(0-0)              | 0<br>(0-0)              | 0<br>(0-0)             | 0<br>(0-0)              | 0<br>(0-0)              | 0<br>(0-0)               |
| Non-exclusive breastfeeding                  | 0<br>(0-0)             | 0<br>(0-0)              | 0<br>(0-0)              | 0<br>(0-0)             | 0<br>(0-0)              | 0<br>(0-0)              | 0<br>(0-0)               |
| Discontinued breastfeeding                   | 0<br>(0-0)             | 0<br>(0-0)              | 0<br>(0-0)              | 0<br>(0-0)             | 0<br>(0-0)              | 0<br>(0-0)              | 0<br>(0-0)               |
| Childhood underweight                        | 0<br>(0-0)             | 0<br>(0-0)              | 0<br>(0-0)              | 0<br>(0-0)             | 0<br>(0-0)              | 0<br>(0-0)              | 0<br>(0-0)               |
| Iron deficiency                              | 987<br>(665-1,412)     | 710<br>(492-994)        | 563<br>(397-783)        | 500<br>(353-699)       | 474<br>(331-671)        | 425<br>(291-599)        | 408<br>(281-574)         |
| Vitamin A deficiency                         | 0<br>(0-0)             | 0<br>(0-0)              | 0<br>(0-0)              | 0<br>(0-0)             | 0<br>(0-0)              | 0<br>(0-0)              | 0<br>(0-0)               |
| Zinc deficiency                              | 0<br>(0-0)             | 0<br>(0-0)              | 0<br>(0-0)              | 0<br>(0-0)             | 0<br>(0-0)              | 0<br>(0-0)              | 0<br>(0-0)               |
| Tobacco smoking, including second-hand smoke | 0<br>(0-0)             | 0<br>(0-0)              | 90<br>(60-123)          | 2,642<br>(1,962-3,688) | 4,213<br>(2,767-5,793)  | 7,425<br>(5,651-9,336)  | 10,069<br>(8,511-11,741) |
| Tobacco smoking                              | 0<br>(0-0)             | 0<br>(0-0)              | 0<br>(0-0)              | 2,528<br>(1,857-3,566) | 4,102<br>(2,646-5,662)  | 7,246<br>(5,451-9,137)  | 9,823<br>(8,230-11,512)  |
| Second-hand smoke                            | 0<br>(0-0)             | 0<br>(0-0)              | 90<br>(60-123)          | 115<br>(77-153)        | 112<br>(71-154)         | 179<br>(119-242)        | 246<br>(164-330)         |
| Alcohol and drug use                         | 4,824<br>(4,033-5,706) | 9,104<br>(7,657-10,710) | 9,512<br>(8,036-11,030) | 8,098<br>(6,905-9,391) | 9,179<br>(7,946-10,558) | 8,945<br>(7,853-10,118) | 9,018<br>(7,935-10,170)  |
| Alcohol use                                  | 3,775<br>(3,118-4,508) | 5,963<br>(4,963-7,047)  | 6,069<br>(5,099-7,099)  | 5,522<br>(4,724-6,438) | 7,263<br>(6,263-8,385)  | 7,577<br>(6,621-8,645)  | 8,096<br>(7,066-9,149)   |
| Drug use                                     | 1,061<br>(792-1,394)   | 3,178<br>(2,399-4,007)  | 3,486<br>(2,625-4,354)  | 2,603<br>(1,997-3,272) | 1,946<br>(1,524-2,448)  | 1,402<br>(1,092-1,756)  | 959<br>(743-1,245)       |

**Web table 3: Global DALYs (in thousands) attributable to risk factors by age and sex in 2010**

| Risk                                          | Males,<br>15-19 Years  | Males,<br>20-24 Years  | Males,<br>25-29 Years  | Males,<br>30-34 Years  | Males,<br>35-39 Years  | Males,<br>40-44 Years  | Males,<br>45-49 Years     |
|-----------------------------------------------|------------------------|------------------------|------------------------|------------------------|------------------------|------------------------|---------------------------|
| Physiological risk factors                    |                        |                        |                        |                        |                        |                        |                           |
| High fasting plasma glucose                   | 0<br>(0-0)             | 0<br>(0-0)             | 898<br>(721-1,085)     | 1,224<br>(986-1,503)   | 2,189<br>(1,784-2,627) | 2,984<br>(2,453-3,593) | 4,663<br>(3,880-5,470)    |
| High total cholesterol                        | 0<br>(0-0)             | 0<br>(0-0)             | 302<br>(192-426)       | 433<br>(275-624)       | 984<br>(691-1,315)     | 1,532<br>(1,076-2,013) | 2,302<br>(1,671-2,962)    |
| High blood pressure                           | 0<br>(0-0)             | 0<br>(0-0)             | 1,463<br>(1,139-1,784) | 1,845<br>(1,449-2,247) | 3,120<br>(2,550-3,676) | 4,571<br>(3,760-5,414) | 7,527<br>(6,483-8,572)    |
| High body-mass index                          | 0<br>(0-0)             | 0<br>(0-0)             | 1,086<br>(837-1,376)   | 1,400<br>(1,075-1,763) | 2,416<br>(1,909-2,962) | 3,624<br>(2,872-4,431) | 4,911<br>(3,993-5,876)    |
| Low bone mineral density                      | 0<br>(0-0)                |
| Dietary risk factors and physical inactivity  |                        |                        |                        |                        |                        |                        |                           |
| Diet low in fruits                            | 0<br>(0-0)             | 0<br>(0-0)             | 2,424<br>(2,088-2,783) | 3,464<br>(3,030-3,940) | 5,301<br>(4,678-5,911) | 8,481<br>(7,474-9,435) | 11,851<br>(10,497-13,111) |
| Diet low in vegetables                        | 0<br>(0-0)             | 0<br>(0-0)             | 1,237<br>(925-1,542)   | 1,706<br>(1,289-2,109) | 2,569<br>(1,936-3,174) | 4,164<br>(3,168-5,099) | 5,788<br>(4,341-7,060)    |
| Diet low in whole grains                      | 0<br>(0-0)             | 0<br>(0-0)             | 618<br>(396-851)       | 816<br>(544-1,100)     | 1,142<br>(734-1,553)   | 1,716<br>(1,102-2,314) | 2,298<br>(1,480-3,084)    |
| Diet low in nuts and seeds                    | 0<br>(0-0)             | 0<br>(0-0)             | 635<br>(489-790)       | 873<br>(660-1,089)     | 1,265<br>(966-1,560)   | 1,901<br>(1,457-2,335) | 2,418<br>(1,862-2,971)    |
| Diet low in milk                              | 0<br>(0-0)             | 0<br>(0-0)             | 691<br>(458-917)       | 994<br>(646-1,305)     | 1,463<br>(940-1,966)   | 2,285<br>(1,514-2,995) | 3,031<br>(1,947-3,984)    |
| Diet high in red meat                         | 0<br>(0-0)             | 0<br>(0-0)             | 20<br>(6-36)           | 28<br>(8-49)           | 42<br>(12-71)          | 58<br>(16-98)          | 87<br>(26-151)            |
| Diet high in processed meat                   | 0<br>(0-0)             | 0<br>(0-0)             | 29<br>(12-50)          | 44<br>(17-77)          | 70<br>(28-123)         | 93<br>(36-162)         | 108<br>(47-183)           |
| Diet high in sugar-sweetened beverages        | 0<br>(0-0)             | 0<br>(0-0)             | 324<br>(112-551)       | 469<br>(170-806)       | 659<br>(232-1,118)     | 989<br>(327-1,779)     | 1,321<br>(417-2,263)      |
| Diet low in fibre                             | 0<br>(0-0)             | 0<br>(0-0)             | 117<br>(57-186)        | 145<br>(64-215)        | 172<br>(63-305)        | 244<br>(81-427)        | 299<br>(99-485)           |
| Diet low in calcium                           | 0<br>(0-0)             | 0<br>(0-0)             | 287<br>(126-457)       | 397<br>(173-633)       | 582<br>(245-912)       | 867<br>(379-1,373)     | 1,124<br>(479-1,801)      |
| Diet low in seafood omega-3 fatty acids       | 0<br>(0-0)             | 0<br>(0-0)             | 26<br>(18-36)          | 36<br>(24-49)          | 52<br>(37-72)          | 71<br>(51-100)         | 105<br>(77-141)           |
| Diet low in polyunsaturated fatty acids       | 0<br>(0-0)             | 0<br>(0-0)             | 428<br>(296-570)       | 610<br>(418-821)       | 886<br>(610-1,173)     | 1,386<br>(1,004-1,833) | 1,813<br>(1,251-2,380)    |
| Diet high in trans fatty acids                | 0<br>(0-0)             | 0<br>(0-0)             | 195<br>(90-308)        | 270<br>(125-414)       | 382<br>(178-590)       | 575<br>(269-898)       | 746<br>(334-1,147)        |
| Diet high in sodium                           | 0<br>(0-0)             | 0<br>(0-0)             | 201<br>(137-269)       | 281<br>(188-376)       | 390<br>(271-507)       | 588<br>(409-776)       | 765<br>(524-1,004)        |
| Physical inactivity and low physical activity | 0<br>(0-0)             | 0<br>(0-0)             | 383<br>(165-612)       | 628<br>(351-924)       | 1,083<br>(674-1,523)   | 1,906<br>(1,212-2,643) | 2,805<br>(1,811-3,761)    |
| Occupational risk factors                     |                        |                        |                        |                        |                        |                        |                           |
| Occupational carcinogens                      | 2,972<br>(2,311-3,849) | 5,123<br>(3,958-6,643) | 5,716<br>(4,397-7,316) | 5,305<br>(4,141-6,649) | 5,066<br>(3,960-6,390) | 4,795<br>(3,739-5,982) | 4,397<br>(3,419-5,486)    |



**Web table 3: Global DALYs (in thousands) attributable to risk factors by age and sex in 2010**

| Risk                                                      | Males,<br>15-19 Years  | Males,<br>20-24 Years  | Males,<br>25-29 Years  | Males,<br>30-34 Years  | Males,<br>35-39 Years  | Males,<br>40-44 Years  | Males,<br>45-49 Years  |
|-----------------------------------------------------------|------------------------|------------------------|------------------------|------------------------|------------------------|------------------------|------------------------|
| Occupational exposure to asbestos                         | 5<br>(2-8)             | 6<br>(3-9)             | 6<br>(2-9)             | 6<br>(3-9)             | 9<br>(4-12)            | 16<br>(8-22)           | 30<br>(15-43)          |
| Occupational exposure to arsenic                          | 0<br>(0-0)             | 0<br>(0-0)             | 0<br>(0-0)             | 0<br>(0-1)             | 1<br>(0-1)             | 2<br>(1-3)             | 3<br>(1-6)             |
| Occupational exposure to benzene                          | 5<br>(2-9)             | 9<br>(4-16)            | 8<br>(3-14)            | 6<br>(3-11)            | 3<br>(1-6)             | 3<br>(1-5)             | 2<br>(1-3)             |
| Occupational exposure to beryllium                        | 0<br>(0-0)             |
| Occupational exposure to cadmium                          | 0<br>(0-0)             | 0<br>(0-0)             | 0<br>(0-0)             | 0<br>(0-0)             | 1<br>(0-0)             | 1<br>(0-1)             | 2<br>(0-1)             |
| Occupational exposure to chromium                         | 0<br>(0-0)             | 0<br>(0-0)             | 2<br>(0-0)             | 3<br>(0-0)             | 8<br>(0-1)             | 16<br>(1-2)            | 33<br>(1-4)            |
| Occupational exposure to diesel engine exhaust            | 0<br>(0-0)             | 0<br>(0-0)             | 2<br>(1-3)             | 3<br>(1-5)             | 7<br>(4-12)            | 14<br>(8-25)           | 30<br>(18-51)          |
| Occupational exposure to second-hand smoke                | 0<br>(0-0)             | 0<br>(0-0)             | 2<br>(1-2)             | 3<br>(2-4)             | 7<br>(4-11)            | 14<br>(9-21)           | 30<br>(19-42)          |
| Occupational exposure to formaldehyde                     | 1<br>(0-2)             | 2<br>(1-4)             | 2<br>(1-4)             | 2<br>(1-3)             | 1<br>(0-2)             | 2<br>(0-4)             | 1<br>(0-2)             |
| Occupational exposure to nickel                           | 0<br>(0-0)             | 0<br>(0-0)             | 1<br>(0-1)             | 1<br>(0-2)             | 2<br>(1-5)             | 5<br>(1-11)            | 11<br>(3-23)           |
| Occupational exposure to polycyclic aromatic hydrocarbons | 0<br>(0-0)             | 0<br>(0-0)             | 0<br>(0-0)             | 0<br>(0-1)             | 1<br>(1-2)             | 3<br>(1-4)             | 5<br>(2-9)             |
| Occupational exposure to silica                           | 0<br>(0-0)             | 0<br>(0-0)             | 1<br>(1-2)             | 2<br>(1-3)             | 6<br>(3-9)             | 12<br>(7-17)           | 24<br>(15-35)          |
| Occupational exposure to sulfuric acid                    | 0<br>(0-0)             | 0<br>(0-0)             | 0<br>(0-0)             | 0<br>(0-1)             | 1<br>(0-3)             | 3<br>(1-7)             | 7<br>(2-15)            |
| Occupational asthmagens                                   | 105<br>(65-159)        | 126<br>(83-187)        | 123<br>(83-181)        | 105<br>(70-157)        | 106<br>(70-168)        | 109<br>(71-172)        | 124<br>(80-209)        |
| Occupational particulate matter, gases, and fumes         | 0<br>(0-0)             | 0<br>(0-0)             | 304<br>(146-491)       | 344<br>(160-560)       | 408<br>(198-658)       | 491<br>(241-780)       | 590<br>(288-924)       |
| Occupational noise                                        | 98<br>(51-166)         | 167<br>(89-276)        | 210<br>(120-350)       | 243<br>(140-405)       | 228<br>(133-377)       | 247<br>(145-411)       | 244<br>(142-398)       |
| Occupational risk factors for injuries                    | 2,091<br>(1,532-2,970) | 3,750<br>(2,732-5,206) | 3,825<br>(2,752-5,302) | 3,230<br>(2,313-4,461) | 2,741<br>(1,922-3,777) | 2,242<br>(1,570-3,178) | 1,737<br>(1,197-2,490) |
| Occupational low back pain                                | 666<br>(429-982)       | 1,064<br>(697-1,528)   | 1,234<br>(814-1,751)   | 1,360<br>(914-1,913)   | 1,545<br>(1,035-2,180) | 1,632<br>(1,087-2,308) | 1,556<br>(1,040-2,205) |
| Sexual abuse and violence                                 | 394<br>(285-535)       | 516<br>(363-719)       | 444<br>(318-604)       | 378<br>(273-516)       | 354<br>(255-471)       | 335<br>(243-452)       | 309<br>(227-409)       |
| Childhood sexual abuse                                    | 394<br>(285-535)       | 516<br>(363-719)       | 444<br>(318-604)       | 378<br>(273-516)       | 354<br>(255-471)       | 335<br>(243-452)       | 309<br>(227-409)       |
| Intimate partner violence                                 | 0<br>(0-0)             |

**Web table 3: Global DALYs (in thousands) attributable to risk factors by age and sex in 2010**

| Risk                                         | Males,<br>50-54 Years     | Males,<br>55-59 Years     | Males,<br>60-64 Years     | Males,<br>65-69 Years     | Males,<br>70-74 Years    | Males,<br>75-79 Years  | Males,<br>80+ Years    |
|----------------------------------------------|---------------------------|---------------------------|---------------------------|---------------------------|--------------------------|------------------------|------------------------|
| Unimproved water and sanitation              | 175<br>(7-367)            | 168<br>(7-346)            | 167<br>(6-368)            | 136<br>(5-292)            | 131<br>(5-292)           | 87<br>(3-199)          | 79<br>(3-173)          |
| Unimproved water source                      | 54<br>(3-114)             | 49<br>(3-104)             | 49<br>(3-108)             | 40<br>(3-84)              | 36<br>(2-80)             | 24<br>(2-54)           | 21<br>(1-49)           |
| Unimproved sanitation                        | 132<br>(4-286)            | 128<br>(3-272)            | 127<br>(3-298)            | 103<br>(2-234)            | 102<br>(3-237)           | 68<br>(1-164)          | 62<br>(1-140)          |
| Air pollution                                |                           |                           |                           |                           |                          |                        |                        |
| Ambient particulate matter pollution         | 4,624<br>(3,422-5,857)    | 5,630<br>(4,228-7,023)    | 5,413<br>(4,083-6,674)    | 4,815<br>(3,498-6,042)    | 4,479<br>(3,177-5,625)   | 3,237<br>(2,357-4,005) | 2,574<br>(1,882-3,176) |
| Household air pollution from solid fuels     | 4,413<br>(2,925-6,143)    | 5,247<br>(3,354-7,533)    | 5,113<br>(3,349-7,065)    | 4,740<br>(2,928-6,693)    | 4,240<br>(2,543-6,083)   | 2,949<br>(1,737-4,251) | 2,123<br>(1,229-3,161) |
| Ambient ozone pollution                      | 95<br>(31-179)            | 144<br>(47-267)           | 193<br>(65-357)           | 234<br>(78-424)           | 250<br>(88-448)          | 205<br>(70-370)        | 186<br>(63-334)        |
| Other environmental risks                    | 1,062<br>(821-1,380)      | 1,326<br>(1,002-1,728)    | 1,334<br>(1,020-1,738)    | 1,231<br>(949-1,590)      | 1,130<br>(885-1,459)     | 819<br>(655-1,039)     | 627<br>(512-766)       |
| Residential radon                            | 177<br>(22-393)           | 253<br>(31-580)           | 258<br>(33-570)           | 225<br>(29-503)           | 196<br>(26-426)          | 128<br>(17-282)        | 70<br>(10-148)         |
| Lead exposure                                | 885<br>(711-1,114)        | 1,073<br>(857-1,331)      | 1,075<br>(870-1,323)      | 1,007<br>(813-1,243)      | 934<br>(761-1,141)       | 691<br>(563-841)       | 558<br>(460-673)       |
| Child and maternal undernutrition            | 378<br>(263-530)          | 353<br>(245-496)          | 304<br>(213-423)          | 243<br>(174-339)          | 195<br>(138-270)         | 147<br>(104-205)       | 130<br>(96-176)        |
| Suboptimal breastfeeding                     | 0<br>(0-0)                | 0<br>(0-0)                | 0<br>(0-0)                | 0<br>(0-0)                | 0<br>(0-0)               | 0<br>(0-0)             | 0<br>(0-0)             |
| Non-exclusive breastfeeding                  | 0<br>(0-0)                | 0<br>(0-0)                | 0<br>(0-0)                | 0<br>(0-0)                | 0<br>(0-0)               | 0<br>(0-0)             | 0<br>(0-0)             |
| Discontinued breastfeeding                   | 0<br>(0-0)                | 0<br>(0-0)                | 0<br>(0-0)                | 0<br>(0-0)                | 0<br>(0-0)               | 0<br>(0-0)             | 0<br>(0-0)             |
| Childhood underweight                        | 0<br>(0-0)                | 0<br>(0-0)                | 0<br>(0-0)                | 0<br>(0-0)                | 0<br>(0-0)               | 0<br>(0-0)             | 0<br>(0-0)             |
| Iron deficiency                              | 378<br>(263-530)          | 353<br>(245-496)          | 304<br>(213-423)          | 243<br>(174-339)          | 195<br>(138-270)         | 147<br>(104-205)       | 130<br>(96-176)        |
| Vitamin A deficiency                         | 0<br>(0-0)                | 0<br>(0-0)                | 0<br>(0-0)                | 0<br>(0-0)                | 0<br>(0-0)               | 0<br>(0-0)             | 0<br>(0-0)             |
| Zinc deficiency                              | 0<br>(0-0)                | 0<br>(0-0)                | 0<br>(0-0)                | 0<br>(0-0)                | 0<br>(0-0)               | 0<br>(0-0)             | 0<br>(0-0)             |
| Tobacco smoking, including second-hand smoke | 13,353<br>(11,445-15,434) | 16,199<br>(13,587-18,470) | 15,714<br>(13,156-17,916) | 13,635<br>(11,247-15,546) | 12,089<br>(9,621-14,003) | 8,269<br>(6,280-9,556) | 5,790<br>(4,545-6,887) |
| Tobacco smoking                              | 12,986<br>(11,014-15,114) | 15,726<br>(13,140-18,102) | 15,208<br>(12,643-17,420) | 13,134<br>(10,720-15,002) | 11,560<br>(9,069-13,501) | 7,877<br>(5,884-9,216) | 5,446<br>(4,205-6,550) |
| Second-hand smoke                            | 367<br>(255-479)          | 473<br>(328-608)          | 506<br>(350-658)          | 501<br>(336-647)          | 529<br>(360-682)         | 393<br>(264-511)       | 344<br>(231-449)       |
| Alcohol and drug use                         | 8,654<br>(7,656-9,714)    | 7,721<br>(6,858-8,624)    | 5,822<br>(5,142-6,524)    | 3,016<br>(2,586-3,453)    | 2,601<br>(2,195-3,001)   | 1,694<br>(1,394-1,989) | 1,326<br>(1,015-1,608) |
| Alcohol use                                  | 8,097<br>(7,145-9,098)    | 7,400<br>(6,538-8,276)    | 5,650<br>(4,986-6,335)    | 2,966<br>(2,549-3,395)    | 2,570<br>(2,162-2,973)   | 1,676<br>(1,377-1,968) | 1,312<br>(1,003-1,595) |

**Web table 3: Global DALYs (in thousands) attributable to risk factors by age and sex in 2010**

| Risk                                          | Males,<br>50-54 Years     | Males,<br>55-59 Years     | Males,<br>60-64 Years     | Males,<br>65-69 Years     | Males,<br>70-74 Years     | Males,<br>75-79 Years     | Males,<br>80+ Years       |
|-----------------------------------------------|---------------------------|---------------------------|---------------------------|---------------------------|---------------------------|---------------------------|---------------------------|
| Drug use                                      | 597<br>(472-764)          | 360<br>(286-454)          | 205<br>(161-262)          | 50<br>(34-78)             | 31<br>(21-56)             | 18<br>(12-37)             | 14<br>(8-31)              |
| Physiological risk factors                    |                           |                           |                           |                           |                           |                           |                           |
| High fasting plasma glucose                   | 5,700<br>(4,738-6,704)    | 7,120<br>(5,961-8,287)    | 6,601<br>(5,525-7,733)    | 5,788<br>(4,868-6,762)    | 5,240<br>(4,412-6,119)    | 3,718<br>(3,155-4,313)    | 3,021<br>(2,566-3,484)    |
| High total cholesterol                        | 3,047<br>(2,203-3,966)    | 3,435<br>(2,485-4,419)    | 3,211<br>(2,344-4,117)    | 2,616<br>(1,942-3,392)    | 2,473<br>(1,812-3,210)    | 1,612<br>(1,142-2,144)    | 1,233<br>(908-1,583)      |
| High blood pressure                           | 9,833<br>(8,496-11,205)   | 13,579<br>(12,037-15,162) | 13,083<br>(11,597-14,643) | 13,092<br>(11,687-14,538) | 12,725<br>(11,459-14,108) | 9,955<br>(8,888-11,037)   | 8,772<br>(7,845-9,759)    |
| High body-mass index                          | 6,241<br>(5,086-7,449)    | 6,647<br>(5,439-7,891)    | 6,310<br>(5,204-7,451)    | 4,990<br>(4,066-5,945)    | 4,783<br>(3,891-5,714)    | 3,188<br>(2,580-3,843)    | 2,712<br>(2,174-3,296)    |
| Low bone mineral density                      | 404<br>(263-556)          | 434<br>(303-573)          | 471<br>(328-625)          | 426<br>(301-564)          | 453<br>(316-603)          | 397<br>(291-513)          | 520<br>(397-655)          |
| Dietary risk factors and physical inactivity  | 16,349<br>(14,655-17,882) | 19,863<br>(17,878-21,505) | 19,430<br>(17,635-21,230) | 17,840<br>(16,217-19,558) | 17,190<br>(15,484-18,825) | 12,951<br>(11,732-14,088) | 11,431<br>(10,368-12,459) |
| Diet low in fruits                            | 7,976<br>(6,146-9,695)    | 9,563<br>(7,391-11,525)   | 8,822<br>(6,784-10,742)   | 7,823<br>(6,076-9,538)    | 7,102<br>(5,167-8,749)    | 5,038<br>(3,667-6,222)    | 3,736<br>(2,769-4,726)    |
| Diet low in vegetables                        | 3,006<br>(1,977-4,026)    | 3,337<br>(2,182-4,530)    | 3,027<br>(2,051-4,111)    | 2,616<br>(1,730-3,573)    | 2,464<br>(1,627-3,376)    | 1,743<br>(1,152-2,378)    | 1,387<br>(927-1,883)      |
| Diet low in whole grains                      | 3,071<br>(2,377-3,737)    | 3,451<br>(2,666-4,181)    | 3,116<br>(2,434-3,768)    | 2,641<br>(2,042-3,221)    | 2,449<br>(1,906-2,963)    | 1,728<br>(1,340-2,093)    | 1,334<br>(1,028-1,612)    |
| Diet low in nuts and seeds                    | 4,038<br>(2,605-5,324)    | 4,550<br>(2,900-5,933)    | 4,154<br>(2,642-5,394)    | 3,564<br>(2,265-4,697)    | 3,319<br>(2,078-4,405)    | 2,386<br>(1,479-3,152)    | 2,140<br>(1,308-2,905)    |
| Diet low in milk                              | 121<br>(36-205)           | 161<br>(48-280)           | 166<br>(48-281)           | 153<br>(47-259)           | 145<br>(44-244)           | 107<br>(31-180)           | 82<br>(24-137)            |
| Diet high in red meat                         | 120<br>(54-197)           | 133<br>(62-210)           | 120<br>(55-186)           | 101<br>(48-155)           | 92<br>(43-144)            | 66<br>(29-102)            | 50<br>(22-78)             |
| Diet high in processed meat                   | 1,691<br>(513-2,905)      | 1,790<br>(531-3,029)      | 1,612<br>(462-2,775)      | 1,302<br>(371-2,270)      | 1,179<br>(335-2,017)      | 822<br>(234-1,410)        | 741<br>(202-1,280)        |
| Diet high in sugar-sweetened beverages        | 375<br>(115-616)          | 437<br>(131-632)          | 383<br>(119-536)          | 342<br>(229-608)          | 267<br>(182-536)          | 185<br>(117-429)          | 177<br>(88-339)           |
| Diet low in fibre                             | 1,393<br>(608-2,240)      | 1,509<br>(664-2,359)      | 1,306<br>(577-2,068)      | 1,066<br>(477-1,696)      | 1,003<br>(455-1,601)      | 728<br>(331-1,139)        | 631<br>(280-1,002)        |
| Diet low in calcium                           | 148<br>(107-197)          | 202<br>(144-267)          | 213<br>(152-282)          | 205<br>(142-276)          | 204<br>(137-277)          | 161<br>(106-220)          | 147<br>(86-221)           |
| Diet low in seafood omega-3 fatty acids       | 2,376<br>(1,678-3,072)    | 2,603<br>(1,867-3,361)    | 2,305<br>(1,626-2,952)    | 1,927<br>(1,383-2,499)    | 1,747<br>(1,261-2,263)    | 1,207<br>(870-1,574)      | 1,013<br>(716-1,324)      |
| Diet low in polyunsaturated fatty acids       | 964<br>(441-1,497)        | 1,047<br>(487-1,596)      | 934<br>(426-1,457)        | 783<br>(360-1,207)        | 704<br>(315-1,110)        | 494<br>(222-756)          | 427<br>(193-665)          |
| Diet high in trans fatty acids                | 967<br>(675-1,255)        | 1,014<br>(709-1,288)      | 913<br>(641-1,173)        | 742<br>(522-947)          | 639<br>(452-829)          | 448<br>(322-575)          | 393<br>(280-501)          |
| Diet high in sodium                           | 4,058<br>(2,696-5,404)    | 5,184<br>(3,431-6,897)    | 5,305<br>(3,505-7,017)    | 5,045<br>(3,285-6,769)    | 4,753<br>(3,075-6,399)    | 3,442<br>(2,231-4,610)    | 2,786<br>(1,731-3,779)    |
| Physical inactivity and low physical activity | 4,053<br>(3,312-4,827)    | 4,801<br>(3,928-5,699)    | 4,749<br>(3,908-5,656)    | 4,309<br>(3,568-5,096)    | 4,168<br>(3,374-4,982)    | 3,125<br>(2,510-3,748)    | 2,736<br>(2,167-3,322)    |

**Web table 3: Global DALYs (in thousands) attributable to risk factors by age and sex in 2010**

| Risk                                                      | Males,<br>50-54 Years  | Males,<br>55-59 Years  | Males,<br>60-64 Years  | Males,<br>65-69 Years  | Males,<br>70-74 Years  | Males,<br>75-79 Years | Males,<br>80+ Years |
|-----------------------------------------------------------|------------------------|------------------------|------------------------|------------------------|------------------------|-----------------------|---------------------|
| Occupational risk factors                                 | 4,105<br>(3,193-5,134) | 3,785<br>(2,936-4,747) | 2,837<br>(2,120-3,626) | 1,657<br>(1,184-2,192) | 1,489<br>(1,041-2,012) | 979<br>(654-1,359)    | 92<br>(55-121)      |
| Occupational carcinogens                                  | 229<br>(143-335)       | 386<br>(233-563)       | 393<br>(241-563)       | 282<br>(172-390)       | 247<br>(146-350)       | 127<br>(77-173)       | 92<br>(55-121)      |
| Occupational exposure to asbestos                         | 50<br>(26-71)          | 68<br>(34-94)          | 81<br>(44-110)         | 74<br>(41-102)         | 72<br>(40-98)          | 54<br>(30-75)         | 44<br>(24-60)       |
| Occupational exposure to arsenic                          | 5<br>(2-10)            | 10<br>(3-18)           | 9<br>(4-18)            | 6<br>(2-11)            | 5<br>(2-10)            | 2<br>(1-4)            | 1<br>(0-3)          |
| Occupational exposure to benzene                          | 2<br>(1-3)             | 2<br>(1-4)             | 2<br>(1-4)             | 3<br>(1-5)             | 3<br>(1-5)             | 3<br>(1-5)            | 1<br>(0-2)          |
| Occupational exposure to beryllium                        | 0<br>(0-1)             | 1<br>(0-1)             | 1<br>(0-1)             | 0<br>(0-1)             | 0<br>(0-1)             | 0<br>(0-0)            | 0<br>(0-0)          |
| Occupational exposure to cadmium                          | 1<br>(0-2)             | 2<br>(1-4)             | 2<br>(1-3)             | 1<br>(1-2)             | 1<br>(0-2)             | 0<br>(0-1)            | 0<br>(0-0)          |
| Occupational exposure to chromium                         | 4<br>(2-6)             | 7<br>(4-10)            | 7<br>(4-10)            | 4<br>(2-6)             | 4<br>(2-5)             | 1<br>(1-2)            | 1<br>(0-1)          |
| Occupational exposure to diesel engine exhaust            | 51<br>(27-81)          | 94<br>(48-148)         | 92<br>(49-142)         | 60<br>(31-92)          | 51<br>(24-77)          | 20<br>(10-32)         | 14<br>(6-20)        |
| Occupational exposure to second-hand smoke                | 47<br>(28-65)          | 86<br>(52-118)         | 85<br>(51-116)         | 55<br>(32-74)          | 46<br>(26-62)          | 18<br>(10-25)         | 12<br>(7-17)        |
| Occupational exposure to formaldehyde                     | 1<br>(0-2)             | 1<br>(0-3)             | 1<br>(0-2)             | 1<br>(0-3)             | 1<br>(0-2)             | 1<br>(0-1)            | 0<br>(0-0)          |
| Occupational exposure to nickel                           | 17<br>(4-36)           | 32<br>(8-69)           | 32<br>(8-67)           | 21<br>(5-43)           | 17<br>(4-37)           | 7<br>(2-15)           | 5<br>(1-10)         |
| Occupational exposure to polycyclic aromatic hydrocarbons | 8<br>(4-14)            | 15<br>(7-26)           | 15<br>(7-25)           | 10<br>(4-16)           | 8<br>(3-14)            | 3<br>(1-6)            | 2<br>(1-4)          |
| Occupational exposure to silica                           | 38<br>(22-55)          | 70<br>(41-101)         | 69<br>(41-98)          | 45<br>(26-63)          | 39<br>(21-53)          | 16<br>(8-22)          | 11<br>(5-15)        |
| Occupational exposure to sulfuric acid                    | 10<br>(3-23)           | 13<br>(4-28)           | 12<br>(3-26)           | 8<br>(2-18)            | 6<br>(2-14)            | 2<br>(1-5)            | 2<br>(0-4)          |
| Occupational asthmagens                                   | 132<br>(86-230)        | 136<br>(88-240)        | 111<br>(71-198)        | 72<br>(43-130)         | 65<br>(40-114)         | 46<br>(28-80)         | 0<br>(0-0)          |
| Occupational particulate matter, gases, and fumes         | 774<br>(391-1,211)     | 958<br>(480-1,464)     | 925<br>(433-1,473)     | 665<br>(295-1,078)     | 681<br>(302-1,097)     | 543<br>(250-875)      | 0<br>(0-0)          |
| Occupational noise                                        | 276<br>(163-440)       | 199<br>(113-322)       | 186<br>(105-299)       | 82<br>(46-133)         | 84<br>(47-137)         | 20<br>(8-38)          | 0<br>(0-0)          |
| Occupational risk factors for injuries                    | 1,279<br>(900-1,897)   | 870<br>(603-1,280)     | 414<br>(291-592)       | 149<br>(105-221)       | 86<br>(61-124)         | 21<br>(15-30)         | 0<br>(0-0)          |
| Occupational low back pain                                | 1,415<br>(951-1,999)   | 1,236<br>(833-1,740)   | 809<br>(539-1,152)     | 407<br>(264-585)       | 326<br>(211-466)       | 222<br>(144-320)      | 0<br>(0-0)          |
| Sexual abuse and violence                                 | 263<br>(194-357)       | 196<br>(145-265)       | 122<br>(90-167)        | 69<br>(49-95)          | 42<br>(31-57)          | 24<br>(17-33)         | 14<br>(10-19)       |
| Childhood sexual abuse                                    | 263<br>(194-357)       | 196<br>(145-265)       | 122<br>(90-167)        | 69<br>(49-95)          | 42<br>(31-57)          | 24<br>(17-33)         | 14<br>(10-19)       |
| Intimate partner violence                                 | 0<br>(0-0)             | 0<br>(0-0)             | 0<br>(0-0)             | 0<br>(0-0)             | 0<br>(0-0)             | 0<br>(0-0)            | 0<br>(0-0)          |

**Web table 3: Global DALYs (in thousands) attributable to risk factors by age and sex in 2010**

| Risk                                         | Females,<br>All Ages      | Females,<br>0-6 Days   | Females,<br>7-27 Days  | Females,<br>28-364 Days   | Females,<br>1-4 Years     | Females,<br>5-9 Years  | Females,<br>10-14 Years |
|----------------------------------------------|---------------------------|------------------------|------------------------|---------------------------|---------------------------|------------------------|-------------------------|
| Unimproved water and sanitation              | 10,165<br>(428-19,650)    | 215<br>(10-443)        | 469<br>(21-937)        | 3,271<br>(144-6,349)      | 2,643<br>(117-5,122)      | 542<br>(20-1,075)      | 292<br>(10-607)         |
| Unimproved water source                      | 3,694<br>(242-7,511)      | 83<br>(6-178)          | 176<br>(12-372)        | 1,257<br>(84-2,556)       | 1,007<br>(69-2,071)       | 184<br>(12-388)        | 95<br>(6-199)           |
| Unimproved sanitation                        | 7,192<br>(187-14,099)     | 149<br>(4-318)         | 329<br>(9-689)         | 2,260<br>(59-4,548)       | 1,836<br>(49-3,658)       | 393<br>(9-810)         | 215<br>(5-452)          |
| Air pollution                                |                           |                        |                        |                           |                           |                        |                         |
| Ambient particulate matter pollution         | 29,431<br>(25,722-33,273) | 574<br>(339-919)       | 517<br>(309-764)       | 2,333<br>(1,554-3,271)    | 1,469<br>(973-2,105)      | 0<br>(0-0)             | 0<br>(0-0)              |
| Household air pollution from solid fuels     | 47,914<br>(37,929-58,289) | 1,945<br>(1,264-2,835) | 1,679<br>(1,122-2,307) | 8,046<br>(5,454-10,828)   | 4,881<br>(3,393-6,615)    | 0<br>(0-0)             | 0<br>(0-0)              |
| Ambient ozone pollution                      | 1,016<br>(331-1,758)      | 0<br>(0-0)             | 0<br>(0-0)             | 0<br>(0-0)                | 0<br>(0-0)                | 0<br>(0-0)             | 0<br>(0-0)              |
| Other environmental risks                    | 6,617<br>(5,322-7,938)    | 0<br>(0-0)             | 0<br>(0-0)             | 0<br>(0-0)                | 1<br>(0-3)                | 5<br>(2-9)             | 3<br>(2-6)              |
| Residential radon                            | 600<br>(84-1,355)         | 0<br>(0-0)             | 0<br>(0-0)             | 0<br>(0-0)                | 0<br>(0-0)                | 0<br>(0-0)             | 0<br>(0-0)              |
| Lead exposure                                | 6,017<br>(4,915-7,231)    | 0<br>(0-0)             | 0<br>(0-0)             | 0<br>(0-0)                | 1<br>(0-3)                | 5<br>(2-9)             | 3<br>(2-6)              |
| Child and maternal undernutrition            | 82,894<br>(69,171-98,757) | 0<br>(0-0)             | 3,522<br>(2,135-4,989) | 31,024<br>(24,986-37,901) | 27,426<br>(22,504-32,654) | 2,923<br>(1,958-4,229) | 2,134<br>(1,421-3,081)  |
| Suboptimal breastfeeding                     | 21,965<br>(13,717-31,340) | 0<br>(0-0)             | 3,519<br>(2,132-4,986) | 16,705<br>(9,895-24,505)  | 1,741<br>(174-3,840)      | 0<br>(0-0)             | 0<br>(0-0)              |
| Non-exclusive breastfeeding                  | 18,850<br>(10,926-27,569) | 0<br>(0-0)             | 3,519<br>(2,132-4,986) | 15,332<br>(8,690-22,846)  | 0<br>(0-0)                | 0<br>(0-0)             | 0<br>(0-0)              |
| Discontinued breastfeeding                   | 3,114<br>(296-6,915)      | 0<br>(0-0)             | 0<br>(0-0)             | 1,373<br>(128-3,185)      | 1,741<br>(174-3,840)      | 0<br>(0-0)             | 0<br>(0-0)              |
| Childhood underweight                        | 36,045<br>(29,430-43,394) | 0<br>(0-0)             | 0<br>(0-0)             | 18,993<br>(15,240-22,982) | 17,053<br>(13,581-20,993) | 0<br>(0-0)             | 0<br>(0-0)              |
| Iron deficiency                              | 28,251<br>(20,195-39,063) | 0<br>(0-0)             | 3<br>(2-5)             | 1,692<br>(1,192-2,375)    | 5,634<br>(3,822-7,961)    | 2,923<br>(1,958-4,229) | 2,134<br>(1,421-3,081)  |
| Vitamin A deficiency                         | 5,098<br>(2,566-8,168)    | 0<br>(0-0)             | 0<br>(0-0)             | 1,274<br>(566-2,263)      | 3,824<br>(1,941-6,186)    | 0<br>(0-0)             | 0<br>(0-0)              |
| Zinc deficiency                              | 4,256<br>(1,131-7,821)    | 0<br>(0-0)             | 0<br>(0-0)             | 0<br>(0-0)                | 4,256<br>(1,131-7,821)    | 0<br>(0-0)             | 0<br>(0-0)              |
| Tobacco smoking, including second-hand smoke | 41,342<br>(30,473-48,563) | 539<br>(330-825)       | 489<br>(318-690)       | 2,399<br>(1,594-3,255)    | 1,407<br>(951-1,921)      | 0<br>(0-0)             | 0<br>(0-0)              |
| Tobacco smoking                              | 31,272<br>(19,859-38,467) | 0<br>(0-0)             | 0<br>(0-0)             | 0<br>(0-0)                | 0<br>(0-0)                | 0<br>(0-0)             | 0<br>(0-0)              |
| Second-hand smoke                            | 10,070<br>(7,931-12,429)  | 539<br>(330-825)       | 489<br>(318-690)       | 2,399<br>(1,594-3,255)    | 1,407<br>(951-1,921)      | 0<br>(0-0)             | 0<br>(0-0)              |
| Alcohol and drug use                         | 30,033<br>(26,232-34,432) | 18<br>(11-31)          | 15<br>(8-24)           | 100<br>(61-148)           | 268<br>(161-418)          | 84<br>(63-114)         | 163<br>(127-207)        |
| Alcohol use                                  | 22,575<br>(19,542-25,693) | 9<br>(5-18)            | 4<br>(2-10)            | 39<br>(25-63)             | 165<br>(95-267)           | 67<br>(50-91)          | 110<br>(86-138)         |

**Web table 3: Global DALYs (in thousands) attributable to risk factors by age and sex in 2010**

| Risk                                          | Females,<br>All Ages        | Females,<br>0-6 Days | Females,<br>7-27 Days | Females,<br>28-364 Days | Females,<br>1-4 Years | Females,<br>5-9 Years | Females,<br>10-14 Years |
|-----------------------------------------------|-----------------------------|----------------------|-----------------------|-------------------------|-----------------------|-----------------------|-------------------------|
| Drug use                                      | 7,562<br>(5,922-9,471)      | 9<br>(4-17)          | 11<br>(4-17)          | 61<br>(27-104)          | 104<br>(40-195)       | 18<br>(8-36)          | 53<br>(34-81)           |
| Physiological risk factors                    |                             |                      |                       |                         |                       |                       |                         |
| High fasting plasma glucose                   | 39,864<br>(34,103-45,972)   | 0<br>(0-0)           | 0<br>(0-0)            | 0<br>(0-0)              | 0<br>(0-0)            | 0<br>(0-0)            | 0<br>(0-0)              |
| High total cholesterol                        | 17,721<br>(13,153-22,508)   | 0<br>(0-0)           | 0<br>(0-0)            | 0<br>(0-0)              | 0<br>(0-0)            | 0<br>(0-0)            | 0<br>(0-0)              |
| High blood pressure                           | 73,991<br>(66,161-81,931)   | 0<br>(0-0)           | 0<br>(0-0)            | 0<br>(0-0)              | 0<br>(0-0)            | 0<br>(0-0)            | 0<br>(0-0)              |
| High body-mass index                          | 45,300<br>(37,218-54,219)   | 0<br>(0-0)           | 0<br>(0-0)            | 0<br>(0-0)              | 0<br>(0-0)            | 0<br>(0-0)            | 0<br>(0-0)              |
| Low bone mineral density                      | 2,111<br>(1,627-2,618)      | 0<br>(0-0)           | 0<br>(0-0)            | 0<br>(0-0)              | 0<br>(0-0)            | 0<br>(0-0)            | 0<br>(0-0)              |
| Dietary risk factors and physical inactivity  |                             |                      |                       |                         |                       |                       |                         |
| Diet low in fruits                            | 102,310<br>(94,930-110,079) | 0<br>(0-0)           | 0<br>(0-0)            | 0<br>(0-0)              | 0<br>(0-0)            | 0<br>(0-0)            | 0<br>(0-0)              |
| Diet low in vegetables                        | 38,573<br>(29,923-46,512)   | 0<br>(0-0)           | 0<br>(0-0)            | 0<br>(0-0)              | 0<br>(0-0)            | 0<br>(0-0)            | 0<br>(0-0)              |
| Diet low in whole grains                      | 14,389<br>(9,434-19,284)    | 0<br>(0-0)           | 0<br>(0-0)            | 0<br>(0-0)              | 0<br>(0-0)            | 0<br>(0-0)            | 0<br>(0-0)              |
| Diet low in nuts and seeds                    | 15,881<br>(12,615-18,949)   | 0<br>(0-0)           | 0<br>(0-0)            | 0<br>(0-0)              | 0<br>(0-0)            | 0<br>(0-0)            | 0<br>(0-0)              |
| Diet low in milk                              | 18,674<br>(11,716-24,404)   | 0<br>(0-0)           | 0<br>(0-0)            | 0<br>(0-0)              | 0<br>(0-0)            | 0<br>(0-0)            | 0<br>(0-0)              |
| Diet high in red meat                         | 931<br>(264-1,605)          | 0<br>(0-0)           | 0<br>(0-0)            | 0<br>(0-0)              | 0<br>(0-0)            | 0<br>(0-0)            | 0<br>(0-0)              |
| Diet high in processed meat                   | 827<br>(374-1,362)          | 0<br>(0-0)           | 0<br>(0-0)            | 0<br>(0-0)              | 0<br>(0-0)            | 0<br>(0-0)            | 0<br>(0-0)              |
| Diet high in sugar-sweetened beverages        | 8,038<br>(2,932-12,685)     | 0<br>(0-0)           | 0<br>(0-0)            | 0<br>(0-0)              | 0<br>(0-0)            | 0<br>(0-0)            | 0<br>(0-0)              |
| Diet low in fibre                             | 2,108<br>(1,052-3,335)      | 0<br>(0-0)           | 0<br>(0-0)            | 0<br>(0-0)              | 0<br>(0-0)            | 0<br>(0-0)            | 0<br>(0-0)              |
| Diet low in calcium                           | 5,559<br>(2,500-8,639)      | 0<br>(0-0)           | 0<br>(0-0)            | 0<br>(0-0)              | 0<br>(0-0)            | 0<br>(0-0)            | 0<br>(0-0)              |
| Diet low in seafood omega-3 fatty acids       | 1,019<br>(720-1,319)        | 0<br>(0-0)           | 0<br>(0-0)            | 0<br>(0-0)              | 0<br>(0-0)            | 0<br>(0-0)            | 0<br>(0-0)              |
| Diet low in polyunsaturated fatty acids       | 9,899<br>(7,241-12,596)     | 0<br>(0-0)           | 0<br>(0-0)            | 0<br>(0-0)              | 0<br>(0-0)            | 0<br>(0-0)            | 0<br>(0-0)              |
| Diet high in trans fatty acids                | 4,159<br>(1,973-6,396)      | 0<br>(0-0)           | 0<br>(0-0)            | 0<br>(0-0)              | 0<br>(0-0)            | 0<br>(0-0)            | 0<br>(0-0)              |
| Diet high in sodium                           | 4,253<br>(3,106-5,416)      | 0<br>(0-0)           | 0<br>(0-0)            | 0<br>(0-0)              | 0<br>(0-0)            | 0<br>(0-0)            | 0<br>(0-0)              |
| Physical inactivity and low physical activity | 23,852<br>(15,544-31,682)   | 0<br>(0-0)           | 0<br>(0-0)            | 0<br>(0-0)              | 0<br>(0-0)            | 0<br>(0-0)            | 0<br>(0-0)              |
|                                               | 32,311<br>(27,698-37,217)   | 0<br>(0-0)           | 0<br>(0-0)            | 0<br>(0-0)              | 0<br>(0-0)            | 0<br>(0-0)            | 0<br>(0-0)              |

**Web table 3: Global DALYs (in thousands) attributable to risk factors by age and sex in 2010**

| Risk                                                      | Females,<br>All Ages      | Females,<br>0-6 Days | Females,<br>7-27 Days | Females,<br>28-364 Days | Females,<br>1-4 Years | Females,<br>5-9 Years | Females,<br>10-14 Years |
|-----------------------------------------------------------|---------------------------|----------------------|-----------------------|-------------------------|-----------------------|-----------------------|-------------------------|
| Occupational risk factors                                 | 14,171<br>(10,344–18,842) | 0<br>(0–0)           | 0<br>(0–0)            | 0<br>(0–0)              | 0<br>(0–0)            | 0<br>(0–0)            | 0<br>(0–0)              |
| Occupational carcinogens                                  | 594<br>(368–855)          | 0<br>(0–0)           | 0<br>(0–0)            | 0<br>(0–0)              | 0<br>(0–0)            | 0<br>(0–0)            | 0<br>(0–0)              |
| Occupational exposure to asbestos                         | 132<br>(61–184)           | 0<br>(0–0)           | 0<br>(0–0)            | 0<br>(0–0)              | 0<br>(0–0)            | 0<br>(0–0)            | 0<br>(0–0)              |
| Occupational exposure to arsenic                          | 18<br>(7–33)              | 0<br>(0–0)           | 0<br>(0–0)            | 0<br>(0–0)              | 0<br>(0–0)            | 0<br>(0–0)            | 0<br>(0–0)              |
| Occupational exposure to benzene                          | 40<br>(15–72)             | 0<br>(0–0)           | 0<br>(0–0)            | 0<br>(0–0)              | 0<br>(0–0)            | 0<br>(0–0)            | 0<br>(0–0)              |
| Occupational exposure to beryllium                        | 1<br>(0–2)                | 0<br>(0–0)           | 0<br>(0–0)            | 0<br>(0–0)              | 0<br>(0–0)            | 0<br>(0–0)            | 0<br>(0–0)              |
| Occupational exposure to cadmium                          | 3<br>(1–6)                | 0<br>(0–0)           | 0<br>(0–0)            | 0<br>(0–0)              | 0<br>(0–0)            | 0<br>(0–0)            | 0<br>(0–0)              |
| Occupational exposure to chromium                         | 13<br>(7–21)              | 0<br>(0–0)           | 0<br>(0–0)            | 0<br>(0–0)              | 0<br>(0–0)            | 0<br>(0–0)            | 0<br>(0–0)              |
| Occupational exposure to diesel engine exhaust            | 81<br>(42–126)            | 0<br>(0–0)           | 0<br>(0–0)            | 0<br>(0–0)              | 0<br>(0–0)            | 0<br>(0–0)            | 0<br>(0–0)              |
| Occupational exposure to second-hand smoke                | 167<br>(95–228)           | 0<br>(0–0)           | 0<br>(0–0)            | 0<br>(0–0)              | 0<br>(0–0)            | 0<br>(0–0)            | 0<br>(0–0)              |
| Occupational exposure to formaldehyde                     | 9<br>(4–16)               | 0<br>(0–0)           | 0<br>(0–0)            | 0<br>(0–0)              | 0<br>(0–0)            | 0<br>(0–0)            | 0<br>(0–0)              |
| Occupational exposure to nickel                           | 64<br>(18–132)            | 0<br>(0–0)           | 0<br>(0–0)            | 0<br>(0–0)              | 0<br>(0–0)            | 0<br>(0–0)            | 0<br>(0–0)              |
| Occupational exposure to polycyclic aromatic hydrocarbons | 23<br>(10–39)             | 0<br>(0–0)           | 0<br>(0–0)            | 0<br>(0–0)              | 0<br>(0–0)            | 0<br>(0–0)            | 0<br>(0–0)              |
| Occupational exposure to silica                           | 49<br>(26–71)             | 0<br>(0–0)           | 0<br>(0–0)            | 0<br>(0–0)              | 0<br>(0–0)            | 0<br>(0–0)            | 0<br>(0–0)              |
| Occupational exposure to sulfuric acid                    | 6<br>(2–13)               | 0<br>(0–0)           | 0<br>(0–0)            | 0<br>(0–0)              | 0<br>(0–0)            | 0<br>(0–0)            | 0<br>(0–0)              |
| Occupational asthmagens                                   | 661<br>(407–994)          | 0<br>(0–0)           | 0<br>(0–0)            | 0<br>(0–0)              | 0<br>(0–0)            | 0<br>(0–0)            | 0<br>(0–0)              |
| Occupational particulate matter, gases, and fumes         | 2,460<br>(1,105–4,025)    | 0<br>(0–0)           | 0<br>(0–0)            | 0<br>(0–0)              | 0<br>(0–0)            | 0<br>(0–0)            | 0<br>(0–0)              |
| Occupational noise                                        | 1,167<br>(696–1,870)      | 0<br>(0–0)           | 0<br>(0–0)            | 0<br>(0–0)              | 0<br>(0–0)            | 0<br>(0–0)            | 0<br>(0–0)              |
| Occupational risk factors for injuries                    | 1,010<br>(771–1,331)      | 0<br>(0–0)           | 0<br>(0–0)            | 0<br>(0–0)              | 0<br>(0–0)            | 0<br>(0–0)            | 0<br>(0–0)              |
| Occupational low back pain                                | 8,279<br>(5,502–11,602)   | 0<br>(0–0)           | 0<br>(0–0)            | 0<br>(0–0)              | 0<br>(0–0)            | 0<br>(0–0)            | 0<br>(0–0)              |
| Sexual abuse and violence                                 | 19,931<br>(14,524–26,397) | 0<br>(0–0)           | 0<br>(0–0)            | 0<br>(0–0)              | 0<br>(0–0)            | 25<br>(17–35)         | 220<br>(152–305)        |
| Childhood sexual abuse                                    | 4,244<br>(3,082–5,533)    | 0<br>(0–0)           | 0<br>(0–0)            | 0<br>(0–0)              | 0<br>(0–0)            | 25<br>(17–35)         | 220<br>(152–305)        |
| Intimate partner violence                                 | 16,794<br>(11,373–23,087) | 0<br>(0–0)           | 0<br>(0–0)            | 0<br>(0–0)              | 0<br>(0–0)            | 0<br>(0–0)            | 0<br>(0–0)              |

**Web table 3: Global DALYs (in thousands) attributable to risk factors by age and sex in 2010**

| Risk                                         | Females,<br>15-19 Years | Females,<br>20-24 Years | Females,<br>25-29 Years | Females,<br>30-34 Years | Females,<br>35-39 Years | Females,<br>40-44 Years | Females,<br>45-49 Years |
|----------------------------------------------|-------------------------|-------------------------|-------------------------|-------------------------|-------------------------|-------------------------|-------------------------|
| Unimproved water and sanitation              | 279<br>(10-579)         | 328<br>(12-659)         | 315<br>(13-631)         | 247<br>(9-483)          | 208<br>(7-418)          | 161<br>(6-333)          | 154<br>(6-316)          |
| Unimproved water source                      | 95<br>(6-210)           | 114<br>(7-243)          | 114<br>(7-234)          | 89<br>(6-187)           | 73<br>(4-153)           | 55<br>(4-120)           | 49<br>(3-106)           |
| Unimproved sanitation                        | 202<br>(5-428)          | 236<br>(5-485)          | 224<br>(6-459)          | 175<br>(4-354)          | 149<br>(4-310)          | 116<br>(3-249)          | 114<br>(3-240)          |
| Air pollution                                |                         |                         |                         |                         |                         |                         |                         |
| Ambient particulate matter pollution         | 0<br>(0-0)              | 0<br>(0-0)              | 441<br>(311-586)        | 559<br>(397-729)        | 830<br>(604-1,077)      | 1,291<br>(936-1,683)    | 1,626<br>(1,159-2,078)  |
| Household air pollution from solid fuels     | 0<br>(0-0)              | 0<br>(0-0)              | 745<br>(526-994)        | 903<br>(663-1,213)      | 1,246<br>(893-1,667)    | 1,770<br>(1,245-2,350)  | 2,158<br>(1,554-2,858)  |
| Ambient ozone pollution                      | 0<br>(0-0)              | 0<br>(0-0)              | 10<br>(3-22)            | 10<br>(3-24)            | 16<br>(4-32)            | 21<br>(6-42)            | 34<br>(11-65)           |
| Other environmental risks                    | 0<br>(0-0)              | 0<br>(0-0)              | 191<br>(97-310)         | 250<br>(132-388)        | 230<br>(163-391)        | 333<br>(235-558)        | 397<br>(313-490)        |
| Residential radon                            | 0<br>(0-0)              | 0<br>(0-0)              | 4<br>(0-10)             | 7<br>(1-20)             | 15<br>(2-37)            | 31<br>(4-74)            | 48<br>(7-112)           |
| Lead exposure                                | 0<br>(0-0)              | 0<br>(0-0)              | 187<br>(93-306)         | 243<br>(126-380)        | 215<br>(152-373)        | 302<br>(209-524)        | 348<br>(277-426)        |
| Child and maternal undernutrition            | 2,164<br>(1,549-2,974)  | 2,677<br>(1,951-3,565)  | 2,299<br>(1,676-3,058)  | 1,881<br>(1,368-2,506)  | 1,624<br>(1,173-2,185)  | 1,312<br>(941-1,799)    | 972<br>(691-1,359)      |
| Suboptimal breastfeeding                     | 0<br>(0-0)              |
| Non-exclusive breastfeeding                  | 0<br>(0-0)              |
| Discontinued breastfeeding                   | 0<br>(0-0)              |
| Childhood underweight                        | 0<br>(0-0)              |
| Iron deficiency                              | 2,164<br>(1,549-2,974)  | 2,677<br>(1,951-3,565)  | 2,299<br>(1,676-3,058)  | 1,881<br>(1,368-2,506)  | 1,624<br>(1,173-2,185)  | 1,312<br>(941-1,799)    | 972<br>(691-1,359)      |
| Vitamin A deficiency                         | 0<br>(0-0)              |
| Zinc deficiency                              | 0<br>(0-0)              |
| Tobacco smoking, including second-hand smoke | 0<br>(0-0)              | 0<br>(0-0)              | 89<br>(59-120)          | 584<br>(407-1,612)      | 1,052<br>(719-1,745)    | 1,965<br>(1,265-2,790)  | 2,550<br>(1,784-3,331)  |
| Tobacco smoking                              | 0<br>(0-0)              | 0<br>(0-0)              | 0<br>(0-0)              | 469<br>(291-1,499)      | 884<br>(561-1,557)      | 1,733<br>(1,019-2,572)  | 2,209<br>(1,428-2,994)  |
| Second-hand smoke                            | 0<br>(0-0)              | 0<br>(0-0)              | 89<br>(59-120)          | 115<br>(79-153)         | 168<br>(111-227)        | 232<br>(146-327)        | 341<br>(228-465)        |
| Alcohol and drug use                         | 1,474<br>(1,200-1,783)  | 2,670<br>(2,157-3,217)  | 2,707<br>(2,172-3,284)  | 2,191<br>(1,812-2,634)  | 2,236<br>(1,872-2,785)  | 2,187<br>(1,869-2,660)  | 2,279<br>(1,979-2,685)  |
| Alcohol use                                  | 863<br>(714-1,055)      | 1,161<br>(973-1,390)    | 1,150<br>(966-1,361)    | 1,087<br>(919-1,278)    | 1,421<br>(1,181-1,930)  | 1,588<br>(1,350-2,002)  | 1,857<br>(1,598-2,223)  |
| Drug use                                     | 613<br>(453-818)        | 1,512<br>(1,127-1,910)  | 1,561<br>(1,176-2,010)  | 1,109<br>(848-1,417)    | 822<br>(639-1,036)      | 608<br>(477-765)        | 437<br>(343-545)        |



**Web table 3: Global DALYs (in thousands) attributable to risk factors by age and sex in 2010**

| Risk                                          | Females,<br>15-19 Years | Females,<br>20-24 Years | Females,<br>25-29 Years | Females,<br>30-34 Years | Females,<br>35-39 Years | Females,<br>40-44 Years | Females,<br>45-49 Years |
|-----------------------------------------------|-------------------------|-------------------------|-------------------------|-------------------------|-------------------------|-------------------------|-------------------------|
| Physiological risk factors                    |                         |                         |                         |                         |                         |                         |                         |
| High fasting plasma glucose                   | 0<br>(0-0)              | 0<br>(0-0)              | 664<br>(543-821)        | 839<br>(677-1,024)      | 1,439<br>(1,159-1,767)  | 1,947<br>(1,573-2,365)  | 2,968<br>(2,484-3,535)  |
| High total cholesterol                        | 0<br>(0-0)              | 0<br>(0-0)              | 127<br>(78-184)         | 168<br>(103-246)        | 358<br>(243-494)        | 541<br>(357-746)        | 996<br>(728-1,271)      |
| High blood pressure                           | 0<br>(0-0)              | 0<br>(0-0)              | 546<br>(391-732)        | 631<br>(444-836)        | 1,453<br>(1,143-1,780)  | 2,021<br>(1,573-2,498)  | 3,912<br>(3,336-4,499)  |
| High body-mass index                          | 0<br>(0-0)              | 0<br>(0-0)              | 797<br>(614-1,004)      | 989<br>(760-1,240)      | 1,967<br>(1,537-2,443)  | 2,596<br>(2,024-3,202)  | 4,023<br>(3,226-4,914)  |
| Low bone mineral density                      | 0<br>(0-0)              |
| Dietary risk factors and physical inactivity  |                         |                         |                         |                         |                         |                         |                         |
| Diet low in fruits                            | 0<br>(0-0)              | 0<br>(0-0)              | 1,450<br>(1,260-1,652)  | 1,996<br>(1,771-2,247)  | 3,087<br>(2,720-3,476)  | 4,761<br>(4,184-5,288)  | 6,474<br>(5,794-7,191)  |
| Diet low in vegetables                        | 0<br>(0-0)              | 0<br>(0-0)              | 616<br>(465-762)        | 802<br>(619-1,005)      | 1,236<br>(948-1,519)    | 1,976<br>(1,516-2,400)  | 2,709<br>(2,109-3,259)  |
| Diet low in whole grains                      | 0<br>(0-0)              | 0<br>(0-0)              | 304<br>(189-417)        | 376<br>(237-511)        | 534<br>(323-739)        | 784<br>(487-1,087)      | 1,037<br>(623-1,415)    |
| Diet low in nuts and seeds                    | 0<br>(0-0)              | 0<br>(0-0)              | 341<br>(262-426)        | 443<br>(336-551)        | 641<br>(490-793)        | 944<br>(738-1,152)      | 1,188<br>(937-1,451)    |
| Diet low in milk                              | 0<br>(0-0)              | 0<br>(0-0)              | 301<br>(197-409)        | 402<br>(259-543)        | 562<br>(362-745)        | 861<br>(527-1,158)      | 1,111<br>(709-1,455)    |
| Diet high in red meat                         | 0<br>(0-0)              | 0<br>(0-0)              | 16<br>(4-29)            | 22<br>(6-38)            | 35<br>(9-61)            | 53<br>(16-93)           | 74<br>(20-128)          |
| Diet high in processed meat                   | 0<br>(0-0)              | 0<br>(0-0)              | 22<br>(8-40)            | 34<br>(13-59)           | 54<br>(20-92)           | 74<br>(28-127)          | 87<br>(35-147)          |
| Diet high in sugar-sweetened beverages        | 0<br>(0-0)              | 0<br>(0-0)              | 182<br>(82-304)         | 250<br>(119-417)        | 343<br>(166-558)        | 495<br>(222-801)        | 619<br>(273-980)        |
| Diet low in fibre                             | 0<br>(0-0)              | 0<br>(0-0)              | 68<br>(32-101)          | 82<br>(35-121)          | 98<br>(42-209)          | 133<br>(52-323)         | 150<br>(63-302)         |
| Diet low in calcium                           | 0<br>(0-0)              | 0<br>(0-0)              | 115<br>(53-182)         | 149<br>(69-232)         | 216<br>(98-339)         | 318<br>(144-497)        | 404<br>(182-632)        |
| Diet low in seafood omega-3 fatty acids       | 0<br>(0-0)              | 0<br>(0-0)              | 20<br>(12-28)           | 27<br>(17-37)           | 41<br>(28-59)           | 62<br>(44-87)           | 84<br>(59-114)          |
| Diet low in polyunsaturated fatty acids       | 0<br>(0-0)              | 0<br>(0-0)              | 177<br>(122-243)        | 230<br>(157-318)        | 315<br>(221-429)        | 487<br>(328-676)        | 617<br>(423-818)        |
| Diet high in trans fatty acids                | 0<br>(0-0)              | 0<br>(0-0)              | 85<br>(42-130)          | 111<br>(53-171)         | 150<br>(72-236)         | 219<br>(106-346)        | 276<br>(131-424)        |
| Diet high in sodium                           | 0<br>(0-0)              | 0<br>(0-0)              | 99<br>(69-136)          | 128<br>(89-173)         | 171<br>(122-230)        | 252<br>(173-339)        | 315<br>(222-410)        |
| Physical inactivity and low physical activity | 0<br>(0-0)              | 0<br>(0-0)              | 296<br>(157-413)        | 408<br>(265-536)        | 609<br>(378-874)        | 1,012<br>(636-1,402)    | 1,334<br>(877-1,770)    |
| Occupational risk factors                     |                         |                         |                         |                         |                         |                         |                         |
| Occupational carcinogens                      | 657<br>(471-879)        | 982<br>(715-1,298)      | 1,202<br>(875-1,600)    | 1,307<br>(951-1,746)    | 1,524<br>(1,094-2,046)  | 1,657<br>(1,182-2,231)  | 1,636<br>(1,162-2,185)  |

**Web table 3: Global DALYs (in thousands) attributable to risk factors by age and sex in 2010**

| Risk                                                      | Females,<br>15-19 Years | Females,<br>20-24 Years | Females,<br>25-29 Years | Females,<br>30-34 Years | Females,<br>35-39 Years | Females,<br>40-44 Years | Females,<br>45-49 Years |
|-----------------------------------------------------------|-------------------------|-------------------------|-------------------------|-------------------------|-------------------------|-------------------------|-------------------------|
| Occupational exposure to asbestos                         | 2<br>(1-3)              | 2<br>(1-3)              | 2<br>(1-3)              | 2<br>(1-4)              | 4<br>(1-5)              | 6<br>(3-9)              | 10<br>(4-14)            |
| Occupational exposure to arsenic                          | 0<br>(0-0)              | 0<br>(0-0)              | 0<br>(0-0)              | 0<br>(0-0)              | 0<br>(0-1)              | 1<br>(0-2)              | 2<br>(1-3)              |
| Occupational exposure to benzene                          | 3<br>(1-6)              | 7<br>(2-13)             | 6<br>(2-11)             | 6<br>(2-10)             | 3<br>(1-5)              | 3<br>(1-6)              | 1<br>(1-3)              |
| Occupational exposure to beryllium                        | 0<br>(0-0)              |
| Occupational exposure to cadmium                          | 0<br>(0-0)              | 0<br>(0-0)              | 0<br>(0-0)              | 0<br>(0-0)              | 0<br>(0-0)              | 0<br>(0-0)              | 0<br>(0-1)              |
| Occupational exposure to chromium                         | 0<br>(0-0)              | 0<br>(0-0)              | 0<br>(0-0)              | 0<br>(0-0)              | 0<br>(0-1)              | 1<br>(0-1)              | 1<br>(1-2)              |
| Occupational exposure to diesel engine exhaust            | 0<br>(0-0)              | 0<br>(0-0)              | 0<br>(0-1)              | 1<br>(0-2)              | 2<br>(1-3)              | 4<br>(2-7)              | 7<br>(3-12)             |
| Occupational exposure to second-hand smoke                | 0<br>(0-0)              | 0<br>(0-0)              | 1<br>(0-2)              | 2<br>(1-3)              | 4<br>(2-7)              | 8<br>(4-12)             | 15<br>(8-23)            |
| Occupational exposure to formaldehyde                     | 1<br>(0-1)              | 1<br>(0-3)              | 1<br>(0-2)              | 1<br>(0-3)              | 1<br>(0-1)              | 1<br>(0-2)              | 0<br>(0-1)              |
| Occupational exposure to nickel                           | 0<br>(0-0)              | 0<br>(0-0)              | 0<br>(0-1)              | 1<br>(0-2)              | 2<br>(0-4)              | 3<br>(1-7)              | 6<br>(1-13)             |
| Occupational exposure to polycyclic aromatic hydrocarbons | 0<br>(0-0)              | 0<br>(0-0)              | 0<br>(0-0)              | 0<br>(0-1)              | 1<br>(0-1)              | 1<br>(0-2)              | 2<br>(1-4)              |
| Occupational exposure to silica                           | 0<br>(0-0)              | 0<br>(0-0)              | 0<br>(0-0)              | 0<br>(0-1)              | 1<br>(1-2)              | 2<br>(1-4)              | 4<br>(2-7)              |
| Occupational exposure to sulfuric acid                    | 0<br>(0-0)              | 0<br>(0-0)              | 0<br>(0-0)              | 0<br>(0-0)              | 0<br>(0-1)              | 0<br>(0-1)              | 1<br>(0-2)              |
| Occupational asthmagens                                   | 67<br>(36-110)          | 73<br>(43-114)          | 63<br>(38-98)           | 55<br>(34-82)           | 59<br>(36-91)           | 60<br>(39-90)           | 64<br>(41-94)           |
| Occupational particulate matter, gases, and fumes         | 0<br>(0-0)              | 0<br>(0-0)              | 133<br>(57-227)         | 151<br>(63-256)         | 197<br>(85-329)         | 231<br>(99-385)         | 266<br>(118-439)        |
| Occupational noise                                        | 50<br>(28-86)           | 82<br>(44-139)          | 106<br>(60-179)         | 128<br>(71-209)         | 124<br>(73-207)         | 140<br>(81-232)         | 138<br>(81-223)         |
| Occupational risk factors for injuries                    | 110<br>(85-142)         | 163<br>(125-215)        | 163<br>(122-214)        | 139<br>(106-185)        | 127<br>(90-179)         | 106<br>(76-145)         | 80<br>(58-113)          |
| Occupational low back pain                                | 424<br>(272-618)        | 654<br>(435-932)        | 726<br>(486-1,019)      | 820<br>(550-1,149)      | 1,000<br>(670-1,408)    | 1,089<br>(725-1,538)    | 1,040<br>(695-1,466)    |
| Sexual abuse and violence                                 | 2,380<br>(1,594-3,553)  | 2,868<br>(2,035-3,986)  | 2,530<br>(1,818-3,418)  | 2,157<br>(1,594-2,912)  | 2,015<br>(1,439-2,708)  | 1,807<br>(1,286-2,481)  | 1,520<br>(1,069-2,093)  |
| Childhood sexual abuse                                    | 603<br>(410-887)        | 568<br>(391-806)        | 481<br>(335-661)        | 406<br>(294-544)        | 381<br>(278-515)        | 358<br>(261-479)        | 316<br>(234-420)        |
| Intimate partner violence                                 | 1,954<br>(1,136-3,109)  | 2,477<br>(1,635-3,546)  | 2,194<br>(1,476-3,033)  | 1,868<br>(1,310-2,597)  | 1,740<br>(1,186-2,421)  | 1,546<br>(1,029-2,219)  | 1,283<br>(834-1,844)    |

**Web table 3: Global DALYs (in thousands) attributable to risk factors by age and sex in 2010**

| Risk                                         | Females,<br>50-54 Years | Females,<br>55-59 Years | Females,<br>60-64 Years | Females,<br>65-69 Years | Females,<br>70-74 Years | Females,<br>75-79 Years | Females,<br>80+ Years  |
|----------------------------------------------|-------------------------|-------------------------|-------------------------|-------------------------|-------------------------|-------------------------|------------------------|
| Unimproved water and sanitation              | 138<br>(5-278)          | 152<br>(6-318)          | 184<br>(7-398)          | 179<br>(6-393)          | 172<br>(6-377)          | 115<br>(4-253)          | 102<br>(4-226)         |
| Unimproved water source                      | 45<br>(3-92)            | 46<br>(3-102)           | 53<br>(3-115)           | 52<br>(3-116)           | 47<br>(3-108)           | 32<br>(2-75)            | 28<br>(2-66)           |
| Unimproved sanitation                        | 101<br>(2-211)          | 115<br>(3-249)          | 141<br>(4-320)          | 137<br>(3-315)          | 134<br>(3-314)          | 89<br>(2-206)           | 79<br>(2-180)          |
| Air pollution                                |                         |                         |                         |                         |                         |                         |                        |
| Ambient particulate matter pollution         | 2,161<br>(1,574-2,726)  | 2,753<br>(1,957-3,493)  | 2,941<br>(2,113-3,685)  | 2,908<br>(2,066-3,714)  | 3,190<br>(2,253-4,069)  | 2,694<br>(1,894-3,383)  | 3,145<br>(2,299-3,970) |
| Household air pollution from solid fuels     | 2,810<br>(2,007-3,671)  | 3,565<br>(2,489-4,716)  | 3,869<br>(2,783-5,028)  | 4,008<br>(2,840-5,300)  | 4,098<br>(2,957-5,459)  | 3,195<br>(2,281-4,288)  | 2,996<br>(2,076-4,123) |
| Ambient ozone pollution                      | 55<br>(17-101)          | 98<br>(31-181)          | 131<br>(43-238)         | 158<br>(48-281)         | 176<br>(60-317)         | 145<br>(47-253)         | 163<br>(53-288)        |
| Other environmental risks                    | 547<br>(424-687)        | 698<br>(542-864)        | 767<br>(599-948)        | 800<br>(634-978)        | 860<br>(686-1,037)      | 728<br>(597-871)        | 807<br>(670-950)       |
| Residential radon                            | 70<br>(9-157)           | 90<br>(14-205)          | 90<br>(12-201)          | 82<br>(12-181)          | 74<br>(11-165)          | 53<br>(8-123)           | 37<br>(5-81)           |
| Lead exposure                                | 478<br>(384-589)        | 608<br>(486-742)        | 678<br>(540-833)        | 718<br>(578-868)        | 786<br>(637-953)        | 675<br>(560-812)        | 770<br>(643-904)       |
| Child and maternal undernutrition            | 776<br>(528-1,104)      | 601<br>(412-851)        | 457<br>(318-647)        | 340<br>(240-486)        | 292<br>(208-411)        | 234<br>(166-327)        | 236<br>(169-324)       |
| Suboptimal breastfeeding                     | 0<br>(0-0)              | 0<br>(0-0)              | 0<br>(0-0)              | 0<br>(0-0)              | 0<br>(0-0)              | 0<br>(0-0)              | 0<br>(0-0)             |
| Non-exclusive breastfeeding                  | 0<br>(0-0)              | 0<br>(0-0)              | 0<br>(0-0)              | 0<br>(0-0)              | 0<br>(0-0)              | 0<br>(0-0)              | 0<br>(0-0)             |
| Discontinued breastfeeding                   | 0<br>(0-0)              | 0<br>(0-0)              | 0<br>(0-0)              | 0<br>(0-0)              | 0<br>(0-0)              | 0<br>(0-0)              | 0<br>(0-0)             |
| Childhood underweight                        | 0<br>(0-0)              | 0<br>(0-0)              | 0<br>(0-0)              | 0<br>(0-0)              | 0<br>(0-0)              | 0<br>(0-0)              | 0<br>(0-0)             |
| Iron deficiency                              | 776<br>(528-1,104)      | 601<br>(412-851)        | 457<br>(318-647)        | 340<br>(240-486)        | 292<br>(208-411)        | 234<br>(166-327)        | 236<br>(169-324)       |
| Vitamin A deficiency                         | 0<br>(0-0)              | 0<br>(0-0)              | 0<br>(0-0)              | 0<br>(0-0)              | 0<br>(0-0)              | 0<br>(0-0)              | 0<br>(0-0)             |
| Zinc deficiency                              | 0<br>(0-0)              | 0<br>(0-0)              | 0<br>(0-0)              | 0<br>(0-0)              | 0<br>(0-0)              | 0<br>(0-0)              | 0<br>(0-0)             |
| Tobacco smoking, including second-hand smoke | 3,594<br>(2,471-4,446)  | 4,637<br>(3,128-5,618)  | 4,848<br>(3,262-5,941)  | 4,663<br>(3,165-5,670)  | 4,724<br>(3,118-5,779)  | 3,634<br>(2,470-4,496)  | 4,167<br>(2,847-5,109) |
| Tobacco smoking                              | 3,145<br>(1,992-4,008)  | 4,072<br>(2,503-5,090)  | 4,247<br>(2,670-5,330)  | 4,061<br>(2,522-5,109)  | 4,011<br>(2,380-5,118)  | 3,016<br>(1,842-3,870)  | 3,425<br>(2,069-4,366) |
| Second-hand smoke                            | 448<br>(299-598)        | 565<br>(387-740)        | 601<br>(404-797)        | 602<br>(408-792)        | 714<br>(486-931)        | 618<br>(410-824)        | 742<br>(493-977)       |
| Alcohol and drug use                         | 2,346<br>(2,041-2,707)  | 2,428<br>(2,096-2,814)  | 2,110<br>(1,793-2,461)  | 1,413<br>(1,149-1,691)  | 1,803<br>(1,422-2,165)  | 1,480<br>(1,139-1,813)  | 2,061<br>(1,480-2,586) |
| Alcohol use                                  | 2,082<br>(1,807-2,427)  | 2,271<br>(1,949-2,642)  | 2,022<br>(1,707-2,374)  | 1,385<br>(1,124-1,666)  | 1,781<br>(1,401-2,145)  | 1,467<br>(1,126-1,802)  | 2,047<br>(1,467-2,574) |

**Web table 3: Global DALYs (in thousands) attributable to risk factors by age and sex in 2010**

| Risk                                          | Females,<br>50-54 Years | Females,<br>55-59 Years  | Females,<br>60-64 Years   | Females,<br>65-69 Years   | Females,<br>70-74 Years   | Females,<br>75-79 Years   | Females,<br>80+ Years     |
|-----------------------------------------------|-------------------------|--------------------------|---------------------------|---------------------------|---------------------------|---------------------------|---------------------------|
| Drug use                                      | 283<br>(220-358)        | 179<br>(140-228)         | 108<br>(85-138)           | 28<br>(19-42)             | 22<br>(14-41)             | 13<br>(8-27)              | 14<br>(8-30)              |
| Physiological risk factors                    |                         |                          |                           |                           |                           |                           |                           |
| High fasting plasma glucose                   | 3,624<br>(3,056-4,285)  | 4,875<br>(4,143-5,674)   | 4,985<br>(4,262-5,711)    | 5,051<br>(4,359-5,746)    | 5,177<br>(4,394-5,957)    | 4,064<br>(3,458-4,679)    | 4,232<br>(3,524-4,911)    |
| High total cholesterol                        | 1,347<br>(995-1,734)    | 1,937<br>(1,438-2,475)   | 2,138<br>(1,585-2,709)    | 2,227<br>(1,656-2,808)    | 2,701<br>(1,909-3,502)    | 2,242<br>(1,530-3,022)    | 2,939<br>(2,167-3,784)    |
| High blood pressure                           | 4,990<br>(4,254-5,744)  | 7,504<br>(6,605-8,507)   | 8,037<br>(7,030-9,016)    | 9,461<br>(8,477-10,562)   | 11,041<br>(9,932-12,164)  | 10,420<br>(9,396-11,498)  | 13,976<br>(12,685-15,323) |
| High body-mass index                          | 4,767<br>(3,856-5,740)  | 5,564<br>(4,573-6,685)   | 5,585<br>(4,622-6,674)    | 4,842<br>(3,997-5,766)    | 5,184<br>(4,323-6,120)    | 4,108<br>(3,381-4,873)    | 4,879<br>(3,990-5,835)    |
| Low bone mineral density                      | 197<br>(133-278)        | 252<br>(176-342)         | 244<br>(176-323)          | 277<br>(205-363)          | 265<br>(197-347)          | 325<br>(245-417)          | 552<br>(415-697)          |
| Dietary risk factors and physical inactivity  | 8,549<br>(7,717-9,437)  | 10,676<br>(9,616-11,762) | 11,420<br>(10,276-12,487) | 11,843<br>(10,768-13,035) | 13,668<br>(12,443-14,843) | 12,189<br>(11,133-13,298) | 16,197<br>(14,739-17,548) |
| Diet low in fruits                            | 3,606<br>(2,836-4,305)  | 4,466<br>(3,439-5,411)   | 4,537<br>(3,529-5,520)    | 4,614<br>(3,500-5,668)    | 5,042<br>(3,822-6,192)    | 4,285<br>(3,251-5,249)    | 4,684<br>(3,532-5,796)    |
| Diet low in vegetables                        | 1,323<br>(835-1,835)    | 1,539<br>(984-2,101)     | 1,565<br>(1,007-2,127)    | 1,593<br>(1,035-2,182)    | 1,849<br>(1,216-2,510)    | 1,575<br>(1,052-2,138)    | 1,912<br>(1,248-2,586)    |
| Diet low in whole grains                      | 1,475<br>(1,145-1,768)  | 1,760<br>(1,358-2,127)   | 1,783<br>(1,386-2,157)    | 1,725<br>(1,344-2,092)    | 1,966<br>(1,542-2,370)    | 1,669<br>(1,299-2,022)    | 1,945<br>(1,502-2,353)    |
| Diet low in nuts and seeds                    | 1,506<br>(954-1,993)    | 1,913<br>(1,220-2,577)   | 2,093<br>(1,294-2,809)    | 2,136<br>(1,337-2,859)    | 2,533<br>(1,550-3,406)    | 2,185<br>(1,332-2,928)    | 3,072<br>(1,813-4,183)    |
| Diet low in milk                              | 99<br>(27-174)          | 119<br>(34-205)          | 117<br>(31-202)           | 106<br>(31-184)           | 110<br>(31-188)           | 89<br>(25-153)            | 91<br>(25-156)            |
| Diet high in red meat                         | 96<br>(41-160)          | 103<br>(46-168)          | 90<br>(43-147)            | 76<br>(36-121)            | 75<br>(35-120)            | 58<br>(28-90)             | 59<br>(28-92)             |
| Diet high in processed meat                   | 764<br>(307-1,246)      | 871<br>(327-1,415)       | 876<br>(304-1,458)        | 821<br>(261-1,414)        | 936<br>(282-1,596)        | 778<br>(228-1,303)        | 1,102<br>(302-1,923)      |
| Diet high in sugar-sweetened beverages        | 174<br>(72-359)         | 235<br>(76-407)          | 221<br>(71-384)           | 259<br>(82-403)           | 236<br>(78-386)           | 193<br>(120-420)          | 258<br>(112-494)          |
| Diet low in fibre                             | 507<br>(230-782)        | 604<br>(274-936)         | 601<br>(272-937)          | 571<br>(255-893)          | 676<br>(291-1,068)        | 594<br>(262-954)          | 804<br>(347-1,288)        |
| Diet low in calcium                           | 112<br>(77-149)         | 133<br>(92-177)          | 128<br>(90-175)           | 115<br>(80-150)           | 118<br>(79-154)           | 93<br>(63-123)            | 86<br>(58-114)            |
| Diet low in seafood omega-3 fatty acids       | 830<br>(594-1,094)      | 1,041<br>(739-1,363)     | 1,125<br>(782-1,476)      | 1,136<br>(821-1,498)      | 1,338<br>(948-1,754)      | 1,117<br>(808-1,448)      | 1,484<br>(1,078-1,929)    |
| Diet low in polyunsaturated fatty acids       | 365<br>(171-568)        | 442<br>(212-686)         | 471<br>(221-735)          | 468<br>(226-738)          | 529<br>(259-820)          | 443<br>(214-686)          | 601<br>(288-928)          |
| Diet high in trans fatty acids                | 402<br>(290-522)        | 461<br>(327-598)         | 493<br>(353-652)          | 470<br>(338-619)          | 501<br>(365-647)          | 412<br>(299-528)          | 549<br>(390-718)          |
| Diet high in sodium                           | 1,876<br>(1,211-2,501)  | 2,474<br>(1,589-3,299)   | 2,794<br>(1,814-3,739)    | 3,029<br>(1,932-4,041)    | 3,430<br>(2,177-4,581)    | 2,965<br>(1,888-3,989)    | 3,625<br>(2,272-4,929)    |
| Physical inactivity and low physical activity | 2,862<br>(2,422-3,326)  | 3,482<br>(2,938-4,061)   | 3,655<br>(3,118-4,230)    | 3,626<br>(3,073-4,193)    | 4,081<br>(3,407-4,816)    | 3,512<br>(2,894-4,118)    | 4,538<br>(3,634-5,414)    |

**Web table 3: Global DALYs (in thousands) attributable to risk factors by age and sex in 2010**

| Risk                                                      | Females,<br>50-54 Years | Females,<br>55-59 Years | Females,<br>60-64 Years | Females,<br>65-69 Years | Females,<br>70-74 Years | Females,<br>75-79 Years | Females,<br>80+ Years |
|-----------------------------------------------------------|-------------------------|-------------------------|-------------------------|-------------------------|-------------------------|-------------------------|-----------------------|
| Occupational risk factors                                 | 1,533<br>(1,099–2,045)  | 1,369<br>(988–1,835)    | 1,031<br>(740–1,389)    | 484<br>(338–651)        | 451<br>(309–610)        | 308<br>(203–425)        | 30<br>(17–42)         |
| Occupational carcinogens                                  | 65<br>(39–97)           | 103<br>(60–157)         | 99<br>(56–148)          | 67<br>(39–97)           | 63<br>(35–91)           | 32<br>(18–45)           | 30<br>(17–42)         |
| Occupational exposure to asbestos                         | 13<br>(6–20)            | 16<br>(7–23)            | 17<br>(8–24)            | 16<br>(7–22)            | 16<br>(7–22)            | 13<br>(6–18)            | 14<br>(7–19)          |
| Occupational exposure to arsenic                          | 2<br>(1–4)              | 4<br>(1–7)              | 3<br>(1–7)              | 2<br>(1–4)              | 2<br>(1–4)              | 1<br>(0–1)              | 1<br>(0–1)            |
| Occupational exposure to benzene                          | 1<br>(0–2)              | 2<br>(1–4)              | 2<br>(1–3)              | 2<br>(1–4)              | 2<br>(1–3)              | 2<br>(1–4)              | 1<br>(0–2)            |
| Occupational exposure to beryllium                        | 0<br>(0–0)              | 0<br>(0–0)              | 0<br>(0–0)              | 0<br>(0–0)              | 0<br>(0–0)              | 0<br>(0–0)              | 0<br>(0–0)            |
| Occupational exposure to cadmium                          | 0<br>(0–1)              | 1<br>(0–1)              | 1<br>(0–1)              | 0<br>(0–1)              | 0<br>(0–1)              | 0<br>(0–0)              | 0<br>(0–0)            |
| Occupational exposure to chromium                         | 2<br>(1–3)              | 3<br>(1–5)              | 3<br>(1–4)              | 2<br>(1–2)              | 1<br>(1–2)              | 1<br>(0–1)              | 0<br>(0–1)            |
| Occupational exposure to diesel engine exhaust            | 10<br>(5–16)            | 17<br>(9–27)            | 16<br>(8–25)            | 9<br>(5–15)             | 9<br>(4–14)             | 3<br>(1–5)              | 3<br>(1–5)            |
| Occupational exposure to second-hand smoke                | 20<br>(11–30)           | 34<br>(20–49)           | 32<br>(18–48)           | 20<br>(11–28)           | 18<br>(9–26)            | 7<br>(3–9)              | 6<br>(3–9)            |
| Occupational exposure to formaldehyde                     | 0<br>(0–1)              | 0<br>(0–1)              | 0<br>(0–1)              | 0<br>(0–1)              | 0<br>(0–1)              | 0<br>(0–1)              | 0<br>(0–0)            |
| Occupational exposure to nickel                           | 8<br>(2–16)             | 13<br>(3–29)            | 12<br>(3–27)            | 7<br>(2–16)             | 7<br>(2–15)             | 3<br>(1–6)              | 2<br>(1–5)            |
| Occupational exposure to polycyclic aromatic hydrocarbons | 3<br>(1–5)              | 5<br>(2–8)              | 5<br>(2–8)              | 3<br>(1–5)              | 3<br>(1–4)              | 1<br>(0–2)              | 1<br>(0–2)            |
| Occupational exposure to silica                           | 6<br>(3–9)              | 10<br>(6–16)            | 9<br>(5–14)             | 6<br>(3–9)              | 5<br>(3–8)              | 2<br>(1–3)              | 2<br>(1–3)            |
| Occupational exposure to sulfuric acid                    | 1<br>(0–2)              | 1<br>(0–2)              | 1<br>(0–3)              | 1<br>(0–1)              | 1<br>(0–2)              | 0<br>(0–1)              | 0<br>(0–0)            |
| Occupational asthmagens                                   | 60<br>(40–89)           | 57<br>(37–85)           | 44<br>(27–68)           | 23<br>(13–36)           | 20<br>(11–33)           | 15<br>(9–23)            | 0<br>(0–0)            |
| Occupational particulate matter, gases, and fumes         | 305<br>(137–493)        | 350<br>(159–569)        | 329<br>(144–546)        | 177<br>(71–300)         | 180<br>(75–307)         | 142<br>(58–240)         | 0<br>(0–0)            |
| Occupational noise                                        | 149<br>(89–239)         | 94<br>(53–155)          | 87<br>(49–145)          | 30<br>(17–49)           | 31<br>(18–52)           | 8<br>(3–14)             | 0<br>(0–0)            |
| Occupational risk factors for injuries                    | 58<br>(42–81)           | 36<br>(25–50)           | 18<br>(13–26)           | 6<br>(4–8)              | 3<br>(3–5)              | 1<br>(1–1)              | 0<br>(0–0)            |
| Occupational low back pain                                | 897<br>(597–1,253)      | 730<br>(480–1,024)      | 454<br>(296–642)        | 182<br>(116–266)        | 153<br>(99–222)         | 110<br>(71–161)         | 0<br>(0–0)            |
| Sexual abuse and violence                                 | 1,296<br>(909–1,810)    | 1,052<br>(721–1,464)    | 736<br>(509–1,041)      | 492<br>(334–690)        | 371<br>(246–525)        | 244<br>(161–343)        | 218<br>(145–317)      |
| Childhood sexual abuse                                    | 276<br>(203–371)        | 224<br>(164–299)        | 153<br>(114–206)        | 95<br>(69–127)          | 65<br>(47–88)           | 40<br>(29–55)           | 33<br>(24–45)         |
| Intimate partner violence                                 | 1,088<br>(694–1,591)    | 881<br>(559–1,282)      | 619<br>(397–915)        | 420<br>(263–616)        | 322<br>(201–475)        | 212<br>(133–311)        | 191<br>(120–287)      |

0 indicates zero deaths attributable; blank cells indicate that attributable deaths were not quantified

**Web table 4: Global DALYs (in thousands) attributable to risk factors by age and sex in 1990**

| Risk                                         | Both Sexes,<br>All Ages      | Both Sexes,<br>0-6 Days  | Both Sexes,<br>7-27 Days  | Both Sexes,<br>28-364 Days   | Both Sexes,<br>1-4 Years     | Both Sexes,<br>5-9 Years | Both Sexes,<br>10-14 Years |
|----------------------------------------------|------------------------------|--------------------------|---------------------------|------------------------------|------------------------------|--------------------------|----------------------------|
| Unimproved water and sanitation              | 52,169<br>(2,700-93,073)     | 1,535<br>(71-2,871)      | 3,693<br>(183-6,757)      | 19,101<br>(981-34,717)       | 17,174<br>(932-30,328)       | 2,410<br>(106-4,483)     | 1,035<br>(43-1,998)        |
| Unimproved water source                      | 21,172<br>(1,517-40,491)     | 607<br>(42-1,197)        | 1,465<br>(104-2,893)      | 7,759<br>(559-15,141)        | 7,183<br>(530-13,717)        | 932<br>(63-1,842)        | 408<br>(25-830)            |
| Unimproved sanitation                        | 36,050<br>(1,115-66,871)     | 1,076<br>(30-2,109)      | 2,578<br>(81-4,904)       | 13,161<br>(405-24,937)       | 11,730<br>(377-21,680)       | 1,701<br>(46-3,273)      | 723<br>(18-1,438)          |
| Air pollution                                |                              |                          |                           |                              |                              |                          |                            |
| Ambient particulate matter pollution         | 81,699<br>(71,012-92,859)    | 2,910<br>(1,926-4,014)   | 3,045<br>(2,083-4,107)    | 12,321<br>(8,469-16,159)     | 8,225<br>(5,658-11,004)      | 0<br>(0-0)               | 0<br>(0-0)                 |
| Household air pollution from solid fuels     | 170,693<br>(139,087-199,504) | 10,088<br>(7,130-12,913) | 10,709<br>(7,702-13,500)  | 42,869<br>(31,206-53,102)    | 30,083<br>(22,143-38,133)    | 0<br>(0-0)               | 0<br>(0-0)                 |
| Ambient ozone pollution                      | 2,534<br>(851-4,426)         | 0<br>(0-0)               | 0<br>(0-0)                | 0<br>(0-0)                   | 0<br>(0-0)                   | 0<br>(0-0)               | 0<br>(0-0)                 |
| Other environmental risks                    | 5,365<br>(4,534-6,279)       | 0<br>(0-0)               | 0<br>(0-0)                | 0<br>(0-0)                   | 9<br>(4-16)                  | 27<br>(14-46)            | 17<br>(9-29)               |
| Residential radon                            |                              |                          |                           |                              |                              |                          |                            |
| Lead exposure                                | 5,365<br>(4,534-6,279)       | 0<br>(0-0)               | 0<br>(0-0)                | 0<br>(0-0)                   | 9<br>(4-16)                  | 27<br>(14-46)            | 17<br>(9-29)               |
| Child and maternal undernutrition            | 339,965<br>(289,845-402,489) | 0<br>(0-0)               | 21,231<br>(13,610-28,398) | 147,452<br>(123,776-172,966) | 135,125<br>(111,065-169,647) | 7,628<br>(5,130-11,002)  | 5,169<br>(3,478-7,459)     |
| Suboptimal breastfeeding                     | 110,261<br>(69,615-153,539)  | 0<br>(0-0)               | 21,227<br>(13,607-28,395) | 81,098<br>(49,773-115,296)   | 7,936<br>(845-16,932)        | 0<br>(0-0)               | 0<br>(0-0)                 |
| Non-exclusive breastfeeding                  | 96,330<br>(57,274-135,861)   | 0<br>(0-0)               | 21,227<br>(13,607-28,395) | 75,102<br>(43,823-107,837)   | 0<br>(0-0)                   | 0<br>(0-0)               | 0<br>(0-0)                 |
| Discontinued breastfeeding                   | 13,931<br>(1,443-30,062)     | 0<br>(0-0)               | 0<br>(0-0)                | 5,996<br>(591-13,535)        | 7,936<br>(845-16,932)        | 0<br>(0-0)               | 0<br>(0-0)                 |
| Childhood underweight                        | 197,741<br>(169,224-238,276) | 0<br>(0-0)               | 0<br>(0-0)                | 97,653<br>(84,072-114,151)   | 100,088<br>(83,373-124,897)  | 0<br>(0-0)               | 0<br>(0-0)                 |
| Iron deficiency                              | 51,841<br>(37,477-71,202)    | 0<br>(0-0)               | 3<br>(2-5)                | 3,973<br>(2,930-5,403)       | 11,706<br>(8,190-16,430)     | 7,628<br>(5,130-11,002)  | 5,169<br>(3,478-7,459)     |
| Vitamin A deficiency                         | 30,288<br>(14,884-54,488)    | 0<br>(0-0)               | 0<br>(0-0)                | 7,636<br>(3,529-13,078)      | 22,652<br>(11,177-42,339)    | 0<br>(0-0)               | 0<br>(0-0)                 |
| Zinc deficiency                              | 24,375<br>(5,385-45,685)     | 0<br>(0-0)               | 0<br>(0-0)                | 0<br>(0-0)                   | 24,375<br>(5,385-45,685)     | 0<br>(0-0)               | 0<br>(0-0)                 |
| Tobacco smoking, including second-hand smoke | 151,766<br>(136,367-169,522) | 3,178<br>(2,150-4,265)   | 3,429<br>(2,357-4,558)    | 14,537<br>(10,246-18,781)    | 9,270<br>(6,514-12,127)      | 0<br>(0-0)               | 0<br>(0-0)                 |
| Tobacco smoking                              | 113,740<br>(100,454-131,675) | 0<br>(0-0)               | 0<br>(0-0)                | 0<br>(0-0)                   | 0<br>(0-0)                   | 0<br>(0-0)               | 0<br>(0-0)                 |
| Second-hand smoke                            | 38,026<br>(28,832-47,544)    | 3,178<br>(2,150-4,265)   | 3,429<br>(2,357-4,558)    | 14,537<br>(10,246-18,781)    | 9,270<br>(6,514-12,127)      | 0<br>(0-0)               | 0<br>(0-0)                 |
| Alcohol and drug use                         | 88,510<br>(78,717-98,794)    | 36<br>(23-58)            | 30<br>(16-49)             | 145<br>(94-247)              | 532<br>(322-820)             | 277<br>(214-352)         | 524<br>(413-667)           |
| Alcohol use                                  | 73,715<br>(66,090-82,089)    | 19<br>(13-30)            | 11<br>(6-19)              | 82<br>(54-114)               | 386<br>(233-580)             | 242<br>(190-292)         | 420<br>(335-523)           |

**Web table 4: Global DALYs (in thousands) attributable to risk factors by age and sex in 1990**

| Risk                                          | Both Sexes,<br>All Ages      | Both Sexes,<br>0-6 Days | Both Sexes,<br>7-27 Days | Both Sexes,<br>28-364 Days | Both Sexes,<br>1-4 Years | Both Sexes,<br>5-9 Years | Both Sexes,<br>10-14 Years |
|-----------------------------------------------|------------------------------|-------------------------|--------------------------|----------------------------|--------------------------|--------------------------|----------------------------|
| Drug use                                      | 15,171<br>(11,714–19,369)    | 16<br>(6–37)            | 19<br>(7–37)             | 63<br>(29–150)             | 146<br>(50–304)          | 35<br>(15–74)            | 104<br>(66–161)            |
| Physiological risk factors                    |                              |                         |                          |                            |                          |                          |                            |
| High fasting plasma glucose                   | 56,358<br>(48,720–65,030)    | 0<br>(0–0)              | 0<br>(0–0)               | 0<br>(0–0)                 | 0<br>(0–0)               | 0<br>(0–0)               | 0<br>(0–0)                 |
| High total cholesterol                        | 39,526<br>(32,704–47,202)    | 0<br>(0–0)              | 0<br>(0–0)               | 0<br>(0–0)                 | 0<br>(0–0)               | 0<br>(0–0)               | 0<br>(0–0)                 |
| High blood pressure                           | 137,017<br>(124,360–149,366) | 0<br>(0–0)              | 0<br>(0–0)               | 0<br>(0–0)                 | 0<br>(0–0)               | 0<br>(0–0)               | 0<br>(0–0)                 |
| High body-mass index                          | 51,565<br>(40,786–62,557)    | 0<br>(0–0)              | 0<br>(0–0)               | 0<br>(0–0)                 | 0<br>(0–0)               | 0<br>(0–0)               | 0<br>(0–0)                 |
| Low bone mineral density                      | 3,125<br>(2,589–3,811)       | 0<br>(0–0)              | 0<br>(0–0)               | 0<br>(0–0)                 | 0<br>(0–0)               | 0<br>(0–0)               | 0<br>(0–0)                 |
| Dietary risk factors and physical inactivity  | 172,929<br>(160,885–185,502) | 0<br>(0–0)              | 0<br>(0–0)               | 0<br>(0–0)                 | 0<br>(0–0)               | 0<br>(0–0)               | 0<br>(0–0)                 |
| Diet low in fruits                            | 80,453<br>(63,298–95,763)    | 0<br>(0–0)              | 0<br>(0–0)               | 0<br>(0–0)                 | 0<br>(0–0)               | 0<br>(0–0)               | 0<br>(0–0)                 |
| Diet low in vegetables                        | 31,558<br>(21,349–41,921)    | 0<br>(0–0)              | 0<br>(0–0)               | 0<br>(0–0)                 | 0<br>(0–0)               | 0<br>(0–0)               | 0<br>(0–0)                 |
| Diet low in whole grains                      | 29,404<br>(23,097–35,134)    | 0<br>(0–0)              | 0<br>(0–0)               | 0<br>(0–0)                 | 0<br>(0–0)               | 0<br>(0–0)               | 0<br>(0–0)                 |
| Diet low in nuts and seeds                    | 40,525<br>(26,308–51,741)    | 0<br>(0–0)              | 0<br>(0–0)               | 0<br>(0–0)                 | 0<br>(0–0)               | 0<br>(0–0)               | 0<br>(0–0)                 |
| Diet low in milk                              | 1,527<br>(461–2,555)         | 0<br>(0–0)              | 0<br>(0–0)               | 0<br>(0–0)                 | 0<br>(0–0)               | 0<br>(0–0)               | 0<br>(0–0)                 |
| Diet high in red meat                         | 1,208<br>(571–1,909)         | 0<br>(0–0)              | 0<br>(0–0)               | 0<br>(0–0)                 | 0<br>(0–0)               | 0<br>(0–0)               | 0<br>(0–0)                 |
| Diet high in processed meat                   | 17,359<br>(5,137–27,949)     | 0<br>(0–0)              | 0<br>(0–0)               | 0<br>(0–0)                 | 0<br>(0–0)               | 0<br>(0–0)               | 0<br>(0–0)                 |
| Diet high in sugar-sweetened beverages        | 3,756<br>(2,332–5,389)       | 0<br>(0–0)              | 0<br>(0–0)               | 0<br>(0–0)                 | 0<br>(0–0)               | 0<br>(0–0)               | 0<br>(0–0)                 |
| Diet low in fibre                             | 13,347<br>(5,970–20,751)     | 0<br>(0–0)              | 0<br>(0–0)               | 0<br>(0–0)                 | 0<br>(0–0)               | 0<br>(0–0)               | 0<br>(0–0)                 |
| Diet low in calcium                           | 1,836<br>(1,316–2,368)       | 0<br>(0–0)              | 0<br>(0–0)               | 0<br>(0–0)                 | 0<br>(0–0)               | 0<br>(0–0)               | 0<br>(0–0)                 |
| Diet low in seafood omega-3 fatty acids       | 21,740<br>(15,869–27,537)    | 0<br>(0–0)              | 0<br>(0–0)               | 0<br>(0–0)                 | 0<br>(0–0)               | 0<br>(0–0)               | 0<br>(0–0)                 |
| Diet low in polyunsaturated fatty acids       | 9,912<br>(4,655–14,976)      | 0<br>(0–0)              | 0<br>(0–0)               | 0<br>(0–0)                 | 0<br>(0–0)               | 0<br>(0–0)               | 0<br>(0–0)                 |
| Diet high in trans fatty acids                | 8,064<br>(5,893–10,305)      | 0<br>(0–0)              | 0<br>(0–0)               | 0<br>(0–0)                 | 0<br>(0–0)               | 0<br>(0–0)               | 0<br>(0–0)                 |
| Diet high in sodium                           | 46,183<br>(30,363–60,604)    | 0<br>(0–0)              | 0<br>(0–0)               | 0<br>(0–0)                 | 0<br>(0–0)               | 0<br>(0–0)               | 0<br>(0–0)                 |
| Physical inactivity and low physical activity |                              |                         |                          |                            |                          |                          |                            |

**Web table 4: Global DALYs (in thousands) attributable to risk factors by age and sex in 1990**

| Risk                                                      | Both Sexes,<br>All Ages   | Both Sexes,<br>0-6 Days | Both Sexes,<br>7-27 Days | Both Sexes,<br>28-364 Days | Both Sexes,<br>1-4 Years | Both Sexes,<br>5-9 Years | Both Sexes,<br>10-14 Years |
|-----------------------------------------------------------|---------------------------|-------------------------|--------------------------|----------------------------|--------------------------|--------------------------|----------------------------|
| Occupational risk factors                                 | 55,414<br>(45,312–66,718) | 0<br>(0–0)              | 0<br>(0–0)               | 0<br>(0–0)                 | 0<br>(0–0)               | 0<br>(0–0)               | 0<br>(0–0)                 |
| Occupational carcinogens                                  | 1,758<br>(1,220–2,477)    | 0<br>(0–0)              | 0<br>(0–0)               | 0<br>(0–0)                 | 0<br>(0–0)               | 0<br>(0–0)               | 0<br>(0–0)                 |
| Occupational exposure to asbestos                         | 484<br>(354–695)          | 0<br>(0–0)              | 0<br>(0–0)               | 0<br>(0–0)                 | 0<br>(0–0)               | 0<br>(0–0)               | 0<br>(0–0)                 |
| Occupational exposure to arsenic                          | 41<br>(16–77)             | 0<br>(0–0)              | 0<br>(0–0)               | 0<br>(0–0)                 | 0<br>(0–0)               | 0<br>(0–0)               | 0<br>(0–0)                 |
| Occupational exposure to benzene                          | 65<br>(27–112)            | 0<br>(0–0)              | 0<br>(0–0)               | 0<br>(0–0)                 | 0<br>(0–0)               | 0<br>(0–0)               | 0<br>(0–0)                 |
| Occupational exposure to beryllium                        | 2<br>(1–4)                | 0<br>(0–0)              | 0<br>(0–0)               | 0<br>(0–0)                 | 0<br>(0–0)               | 0<br>(0–0)               | 0<br>(0–0)                 |
| Occupational exposure to cadmium                          | 7<br>(3–12)               | 0<br>(0–0)              | 0<br>(0–0)               | 0<br>(0–0)                 | 0<br>(0–0)               | 0<br>(0–0)               | 0<br>(0–0)                 |
| Occupational exposure to chromium                         | 26<br>(16–40)             | 0<br>(0–0)              | 0<br>(0–0)               | 0<br>(0–0)                 | 0<br>(0–0)               | 0<br>(0–0)               | 0<br>(0–0)                 |
| Occupational exposure to diesel engine exhaust            | 332<br>(192–517)          | 0<br>(0–0)              | 0<br>(0–0)               | 0<br>(0–0)                 | 0<br>(0–0)               | 0<br>(0–0)               | 0<br>(0–0)                 |
| Occupational exposure to second-hand smoke                | 358<br>(255–500)          | 0<br>(0–0)              | 0<br>(0–0)               | 0<br>(0–0)                 | 0<br>(0–0)               | 0<br>(0–0)               | 0<br>(0–0)                 |
| Occupational exposure to formaldehyde                     | 18<br>(8–32)              | 0<br>(0–0)              | 0<br>(0–0)               | 0<br>(0–0)                 | 0<br>(0–0)               | 0<br>(0–0)               | 0<br>(0–0)                 |
| Occupational exposure to nickel                           | 128<br>(34–266)           | 0<br>(0–0)              | 0<br>(0–0)               | 0<br>(0–0)                 | 0<br>(0–0)               | 0<br>(0–0)               | 0<br>(0–0)                 |
| Occupational exposure to polycyclic aromatic hydrocarbons | 54<br>(26–92)             | 0<br>(0–0)              | 0<br>(0–0)               | 0<br>(0–0)                 | 0<br>(0–0)               | 0<br>(0–0)               | 0<br>(0–0)                 |
| Occupational exposure to silica                           | 230<br>(154–328)          | 0<br>(0–0)              | 0<br>(0–0)               | 0<br>(0–0)                 | 0<br>(0–0)               | 0<br>(0–0)               | 0<br>(0–0)                 |
| Occupational exposure to sulfuric acid                    | 57<br>(16–122)            | 0<br>(0–0)              | 0<br>(0–0)               | 0<br>(0–0)                 | 0<br>(0–0)               | 0<br>(0–0)               | 0<br>(0–0)                 |
| Occupational asthmagens                                   | 2,129<br>(1,419–3,222)    | 0<br>(0–0)              | 0<br>(0–0)               | 0<br>(0–0)                 | 0<br>(0–0)               | 0<br>(0–0)               | 0<br>(0–0)                 |
| Occupational particulate matter, gases, and fumes         | 9,552<br>(4,385–14,636)   | 0<br>(0–0)              | 0<br>(0–0)               | 0<br>(0–0)                 | 0<br>(0–0)               | 0<br>(0–0)               | 0<br>(0–0)                 |
| Occupational noise                                        | 2,869<br>(1,698–4,582)    | 0<br>(0–0)              | 0<br>(0–0)               | 0<br>(0–0)                 | 0<br>(0–0)               | 0<br>(0–0)               | 0<br>(0–0)                 |
| Occupational risk factors for injuries                    | 21,265<br>(16,644–26,702) | 0<br>(0–0)              | 0<br>(0–0)               | 0<br>(0–0)                 | 0<br>(0–0)               | 0<br>(0–0)               | 0<br>(0–0)                 |
| Occupational low back pain                                | 17,841<br>(11,846–24,945) | 0<br>(0–0)              | 0<br>(0–0)               | 0<br>(0–0)                 | 0<br>(0–0)               | 0<br>(0–0)               | 0<br>(0–0)                 |
| Sexual abuse and violence                                 |                           |                         |                          |                            |                          |                          |                            |
| Childhood sexual abuse                                    |                           |                         |                          |                            |                          |                          |                            |
| Intimate partner violence                                 |                           |                         |                          |                            |                          |                          |                            |



| Web table 4: Global DALYs (in thousands) attributable to risk factors by age and sex in 1990 |                            |                            |                            |                            |                            |                            |                            |
|----------------------------------------------------------------------------------------------|----------------------------|----------------------------|----------------------------|----------------------------|----------------------------|----------------------------|----------------------------|
| Risk                                                                                         | Both Sexes,<br>15-19 Years | Both Sexes,<br>20-24 Years | Both Sexes,<br>25-29 Years | Both Sexes,<br>30-34 Years | Both Sexes,<br>35-39 Years | Both Sexes,<br>40-44 Years | Both Sexes,<br>45-49 Years |
| Unimproved water and sanitation                                                              | 881<br>(38-1,689)          | 875<br>(37-1,638)          | 772<br>(36-1,434)          | 676<br>(33-1,242)          | 621<br>(31-1,128)          | 480<br>(24-897)            | 452<br>(22-833)            |
| Unimproved water source                                                                      | 344<br>(22-708)            | 340<br>(22-691)            | 306<br>(21-604)            | 268<br>(18-537)            | 246<br>(18-484)            | 190<br>(14-376)            | 176<br>(13-348)            |
| Unimproved sanitation                                                                        | 619<br>(17-1,225)          | 616<br>(16-1,197)          | 539<br>(16-1,046)          | 472<br>(14-903)            | 435<br>(12-815)            | 335<br>(11-642)            | 318<br>(9-606)             |
| Air pollution                                                                                |                            |                            |                            |                            |                            |                            |                            |
| Ambient particulate matter pollution                                                         | 0<br>(0-0)                 | 0<br>(0-0)                 | 1,260<br>(915-1,588)       | 1,704<br>(1,246-2,137)     | 2,336<br>(1,788-2,908)     | 3,025<br>(2,277-3,803)     | 3,657<br>(2,687-4,565)     |
| Household air pollution from solid fuels                                                     | 0<br>(0-0)                 | 0<br>(0-0)                 | 2,011<br>(1,532-2,534)     | 2,579<br>(1,944-3,230)     | 3,405<br>(2,574-4,286)     | 4,176<br>(3,145-5,189)     | 5,080<br>(3,879-6,320)     |
| Ambient ozone pollution                                                                      | 0<br>(0-0)                 | 0<br>(0-0)                 | 25<br>(8-46)               | 29<br>(9-53)               | 50<br>(16-89)              | 63<br>(20-114)             | 97<br>(30-173)             |
| Other environmental risks                                                                    | 0<br>(0-0)                 | 0<br>(0-0)                 | 250<br>(145-376)           | 320<br>(198-464)           | 270<br>(219-337)           | 350<br>(286-425)           | 407<br>(340-479)           |
| Residential radon                                                                            |                            |                            |                            |                            |                            |                            |                            |
| Lead exposure                                                                                | 0<br>(0-0)                 | 0<br>(0-0)                 | 250<br>(145-376)           | 320<br>(198-464)           | 270<br>(219-337)           | 350<br>(286-425)           | 407<br>(340-479)           |
| Child and maternal undernutrition                                                            | 3,801<br>(2,743-5,233)     | 3,918<br>(2,919-5,137)     | 3,284<br>(2,423-4,305)     | 2,765<br>(2,063-3,641)     | 2,458<br>(1,834-3,255)     | 1,718<br>(1,257-2,286)     | 1,262<br>(916-1,710)       |
| Suboptimal breastfeeding                                                                     | 0<br>(0-0)                 |
| Non-exclusive breastfeeding                                                                  | 0<br>(0-0)                 |
| Discontinued breastfeeding                                                                   | 0<br>(0-0)                 |
| Childhood underweight                                                                        | 0<br>(0-0)                 |
| Iron deficiency                                                                              | 3,801<br>(2,743-5,233)     | 3,918<br>(2,919-5,137)     | 3,284<br>(2,423-4,305)     | 2,765<br>(2,063-3,641)     | 2,458<br>(1,834-3,255)     | 1,718<br>(1,257-2,286)     | 1,262<br>(916-1,710)       |
| Vitamin A deficiency                                                                         | 0<br>(0-0)                 |
| Zinc deficiency                                                                              | 0<br>(0-0)                 |
| Tobacco smoking, including second-hand smoke                                                 | 0<br>(0-0)                 | 0<br>(0-0)                 | 186<br>(125-244)           | 3,195<br>(2,435-4,208)     | 5,098<br>(3,493-6,822)     | 7,911<br>(6,329-9,627)     | 9,304<br>(8,084-10,829)    |
| Tobacco smoking                                                                              | 0<br>(0-0)                 | 0<br>(0-0)                 | 0<br>(0-0)                 | 2,953<br>(2,205-3,980)     | 4,852<br>(3,233-6,610)     | 7,608<br>(5,984-9,364)     | 8,889<br>(7,606-10,392)    |
| Second-hand smoke                                                                            | 0<br>(0-0)                 | 0<br>(0-0)                 | 186<br>(125-244)           | 241<br>(166-313)           | 246<br>(162-336)           | 303<br>(198-422)           | 416<br>(273-562)           |
| Alcohol and drug use                                                                         | 5,628<br>(4,733-6,618)     | 9,112<br>(7,584-10,715)    | 9,014<br>(7,565-10,577)    | 7,952<br>(6,797-9,194)     | 8,921<br>(7,755-10,196)    | 7,705<br>(6,806-8,690)     | 6,935<br>(6,166-7,767)     |
| Alcohol use                                                                                  | 4,318<br>(3,656-5,090)     | 5,729<br>(4,853-6,691)     | 5,604<br>(4,792-6,477)     | 5,539<br>(4,804-6,345)     | 7,326<br>(6,438-8,418)     | 6,766<br>(6,007-7,696)     | 6,384<br>(5,673-7,173)     |

| Web table 4: Global DALYs (in thousands) attributable to risk factors by age and sex in 1990 |                            |                            |                            |                            |                            |                            |                            |
|----------------------------------------------------------------------------------------------|----------------------------|----------------------------|----------------------------|----------------------------|----------------------------|----------------------------|----------------------------|
| Risk                                                                                         | Both Sexes,<br>15-19 Years | Both Sexes,<br>20-24 Years | Both Sexes,<br>25-29 Years | Both Sexes,<br>30-34 Years | Both Sexes,<br>35-39 Years | Both Sexes,<br>40-44 Years | Both Sexes,<br>45-49 Years |
| Drug use                                                                                     | 1,320<br>(984–1,757)       | 3,422<br>(2,592–4,367)     | 3,452<br>(2,578–4,421)     | 2,447<br>(1,853–3,152)     | 1,634<br>(1,251–2,100)     | 973<br>(755–1,256)         | 587<br>(460–749)           |
| Physiological risk factors                                                                   |                            |                            |                            |                            |                            |                            |                            |
| High fasting plasma glucose                                                                  | 0<br>(0–0)                 | 0<br>(0–0)                 | 1,144<br>(948–1,381)       | 1,492<br>(1,231–1,804)     | 2,528<br>(2,115–3,011)     | 2,920<br>(2,427–3,487)     | 4,282<br>(3,640–4,987)     |
| High total cholesterol                                                                       | 0<br>(0–0)                 | 0<br>(0–0)                 | 454<br>(332–600)           | 698<br>(524–909)           | 1,389<br>(1,121–1,690)     | 1,888<br>(1,541–2,311)     | 2,608<br>(2,149–3,149)     |
| High blood pressure                                                                          | 0<br>(0–0)                 | 0<br>(0–0)                 | 1,671<br>(1,272–2,078)     | 2,153<br>(1,665–2,632)     | 3,925<br>(3,270–4,584)     | 4,891<br>(4,069–5,698)     | 7,844<br>(6,937–8,811)     |
| High body-mass index                                                                         | 0<br>(0–0)                 | 0<br>(0–0)                 | 1,032<br>(720–1,370)       | 1,346<br>(944–1,777)       | 2,491<br>(1,876–3,133)     | 3,093<br>(2,350–3,889)     | 3,972<br>(3,106–4,905)     |
| Low bone mineral density                                                                     | 0<br>(0–0)                 |
| Dietary risk factors and physical inactivity                                                 |                            |                            |                            |                            |                            |                            |                            |
|                                                                                              | 0<br>(0–0)                 | 0<br>(0–0)                 | 3,178<br>(2,854–3,473)     | 4,563<br>(4,163–4,928)     | 6,524<br>(5,925–7,131)     | 8,808<br>(8,073–9,575)     | 11,213<br>(10,183–12,231)  |
| Diet low in fruits                                                                           | 0<br>(0–0)                 | 0<br>(0–0)                 | 1,733<br>(1,375–2,072)     | 2,393<br>(1,854–2,834)     | 3,375<br>(2,650–4,059)     | 4,575<br>(3,581–5,460)     | 5,894<br>(4,590–7,089)     |
| Diet low in vegetables                                                                       | 0<br>(0–0)                 | 0<br>(0–0)                 | 860<br>(540–1,152)         | 1,137<br>(750–1,504)       | 1,489<br>(953–1,985)       | 1,907<br>(1,224–2,559)     | 2,327<br>(1,476–3,119)     |
| Diet low in whole grains                                                                     | 0<br>(0–0)                 | 0<br>(0–0)                 | 834<br>(658–994)           | 1,145<br>(905–1,355)       | 1,545<br>(1,210–1,847)     | 1,947<br>(1,538–2,338)     | 2,265<br>(1,784–2,705)     |
| Diet low in nuts and seeds                                                                   | 0<br>(0–0)                 | 0<br>(0–0)                 | 912<br>(628–1,124)         | 1,324<br>(902–1,643)       | 1,786<br>(1,222–2,248)     | 2,339<br>(1,571–2,949)     | 2,777<br>(1,852–3,511)     |
| Diet low in milk                                                                             | 0<br>(0–0)                 | 0<br>(0–0)                 | 38<br>(10–64)              | 56<br>(17–96)              | 75<br>(23–126)             | 89<br>(27–148)             | 112<br>(33–189)            |
| Diet high in red meat                                                                        | 0<br>(0–0)                 | 0<br>(0–0)                 | 39<br>(16–66)              | 60<br>(25–101)             | 86<br>(36–144)             | 101<br>(41–168)            | 109<br>(48–176)            |
| Diet high in processed meat                                                                  | 0<br>(0–0)                 | 0<br>(0–0)                 | 407<br>(150–646)           | 631<br>(230–1,012)         | 875<br>(317–1,369)         | 1,161<br>(397–1,858)       | 1,331<br>(422–2,116)       |
| Diet high in sugar-sweetened beverages                                                       | 0<br>(0–0)                 | 0<br>(0–0)                 | 152<br>(100–209)           | 182<br>(128–242)           | 238<br>(90–379)            | 289<br>(102–452)           | 325<br>(121–514)           |
| Diet low in fibre                                                                            | 0<br>(0–0)                 | 0<br>(0–0)                 | 406<br>(187–618)           | 567<br>(261–868)           | 760<br>(348–1,167)         | 925<br>(422–1,418)         | 1,047<br>(466–1,630)       |
| Diet low in calcium                                                                          | 0<br>(0–0)                 | 0<br>(0–0)                 | 48<br>(31–63)              | 71<br>(45–91)              | 94<br>(65–121)             | 107<br>(76–135)            | 131<br>(94–165)            |
| Diet low in seafood omega-3 fatty acids                                                      | 0<br>(0–0)                 | 0<br>(0–0)                 | 549<br>(402–687)           | 787<br>(578–985)           | 1,042<br>(761–1,300)       | 1,366<br>(997–1,742)       | 1,594<br>(1,151–2,017)     |
| Diet low in polyunsaturated fatty acids                                                      | 0<br>(0–0)                 | 0<br>(0–0)                 | 264<br>(128–395)           | 370<br>(182–556)           | 491<br>(232–746)           | 627<br>(294–946)           | 731<br>(343–1,109)         |
| Diet high in trans fatty acids                                                               | 0<br>(0–0)                 | 0<br>(0–0)                 | 200<br>(143–258)           | 287<br>(205–365)           | 387<br>(279–496)           | 520<br>(383–662)           | 621<br>(449–791)           |
| Diet high in sodium                                                                          | 0<br>(0–0)                 | 0<br>(0–0)                 | 637<br>(333–916)           | 997<br>(631–1,351)         | 1,521<br>(966–2,083)       | 2,177<br>(1,430–2,913)     | 2,825<br>(1,915–3,710)     |
| Physical inactivity and low physical activity                                                |                            |                            |                            |                            |                            |                            |                            |
|                                                                                              | 4,762<br>(3,838–5,821)     | 6,282<br>(5,034–7,682)     | 6,399<br>(5,238–7,706)     | 5,985<br>(4,858–7,249)     | 5,712<br>(4,594–6,986)     | 4,789<br>(3,838–5,879)     | 4,359<br>(3,479–5,380)     |
| Occupational risk factors                                                                    |                            |                            |                            |                            |                            |                            |                            |

| Web table 4: Global DALYs (in thousands) attributable to risk factors by age and sex in 1990 |                            |                            |                            |                            |                            |                            |                            |
|----------------------------------------------------------------------------------------------|----------------------------|----------------------------|----------------------------|----------------------------|----------------------------|----------------------------|----------------------------|
| Risk                                                                                         | Both Sexes,<br>15-19 Years | Both Sexes,<br>20-24 Years | Both Sexes,<br>25-29 Years | Both Sexes,<br>30-34 Years | Both Sexes,<br>35-39 Years | Both Sexes,<br>40-44 Years | Both Sexes,<br>45-49 Years |
| Occupational carcinogens                                                                     | 15<br>(10–21)              | 20<br>(13–29)              | 24<br>(16–35)              | 29<br>(20–42)              | 49<br>(34–70)              | 74<br>(50–104)             | 132<br>(90–190)            |
| Occupational exposure to asbestos                                                            | 7<br>(5–10)                | 7<br>(5–10)                | 6<br>(4–9)                 | 8<br>(5–11)                | 12<br>(8–16)               | 19<br>(13–27)              | 29<br>(21–41)              |
| Occupational exposure to arsenic                                                             | 0<br>(0–0)                 | 0<br>(0–0)                 | 0<br>(0–0)                 | 0<br>(0–1)                 | 1<br>(0–2)                 | 2<br>(1–3)                 | 4<br>(1–7)                 |
| Occupational exposure to benzene                                                             | 7<br>(3–12)                | 11<br>(4–19)               | 10<br>(4–18)               | 9<br>(4–16)                | 5<br>(2–9)                 | 4<br>(2–7)                 | 2<br>(1–4)                 |
| Occupational exposure to beryllium                                                           | 0<br>(0–0)                 |
| Occupational exposure to cadmium                                                             | 0<br>(0–0)                 | 0<br>(0–0)                 | 0<br>(0–0)                 | 0<br>(0–0)                 | 0<br>(0–0)                 | 0<br>(0–1)                 | 1<br>(0–1)                 |
| Occupational exposure to chromium                                                            | 0<br>(0–0)                 | 0<br>(0–0)                 | 0<br>(0–0)                 | 0<br>(0–0)                 | 1<br>(0–1)                 | 1<br>(1–2)                 | 2<br>(1–3)                 |
| Occupational exposure to diesel engine exhaust                                               | 0<br>(0–0)                 | 0<br>(0–0)                 | 2<br>(1–2)                 | 3<br>(2–4)                 | 9<br>(5–13)                | 13<br>(7–20)               | 27<br>(16–43)              |
| Occupational exposure to second-hand smoke                                                   | 0<br>(0–0)                 | 0<br>(0–0)                 | 2<br>(1–3)                 | 3<br>(2–5)                 | 10<br>(7–14)               | 15<br>(10–21)              | 30<br>(21–43)              |
| Occupational exposure to formaldehyde                                                        | 1<br>(1–2)                 | 3<br>(1–4)                 | 2<br>(1–4)                 | 2<br>(1–4)                 | 2<br>(1–3)                 | 2<br>(1–3)                 | 1<br>(0–2)                 |
| Occupational exposure to nickel                                                              | 0<br>(0–0)                 | 0<br>(0–0)                 | 1<br>(0–1)                 | 1<br>(0–2)                 | 3<br>(1–7)                 | 5<br>(1–11)                | 11<br>(3–23)               |
| Occupational exposure to polycyclic aromatic hydrocarbons                                    | 0<br>(0–0)                 | 0<br>(0–0)                 | 0<br>(0–0)                 | 0<br>(0–1)                 | 1<br>(1–2)                 | 2<br>(1–4)                 | 5<br>(2–7)                 |
| Occupational exposure to silica                                                              | 0<br>(0–0)                 | 0<br>(0–0)                 | 1<br>(1–2)                 | 2<br>(1–3)                 | 6<br>(4–9)                 | 9<br>(6–13)                | 19<br>(12–27)              |
| Occupational exposure to sulfuric acid                                                       | 0<br>(0–0)                 | 0<br>(0–0)                 | 0<br>(0–0)                 | 0<br>(0–1)                 | 1<br>(0–3)                 | 3<br>(1–6)                 | 5<br>(2–12)                |
| Occupational asthmagens                                                                      | 209<br>(135–306)           | 208<br>(137–297)           | 181<br>(123–259)           | 156<br>(107–224)           | 170<br>(113–251)           | 158<br>(106–238)           | 179<br>(115–298)           |
| Occupational particulate matter, gases, and fumes                                            | 0<br>(0–0)                 | 0<br>(0–0)                 | 405<br>(186–657)           | 468<br>(217–755)           | 602<br>(281–950)           | 650<br>(310–995)           | 794<br>(391–1,218)         |
| Occupational noise                                                                           | 174<br>(94–295)            | 239<br>(131–403)           | 291<br>(163–485)           | 343<br>(194–568)           | 310<br>(181–505)           | 292<br>(171–472)           | 275<br>(163–433)           |
| Occupational risk factors for injuries                                                       | 2,898<br>(2,201–3,741)     | 3,991<br>(3,026–5,040)     | 3,630<br>(2,801–4,653)     | 3,001<br>(2,337–3,786)     | 2,477<br>(1,866–3,214)     | 1,733<br>(1,321–2,274)     | 1,285<br>(972–1,666)       |
| Occupational low back pain                                                                   | 1,466<br>(958–2,091)       | 1,823<br>(1,199–2,577)     | 1,867<br>(1,231–2,599)     | 1,987<br>(1,315–2,779)     | 2,104<br>(1,398–2,928)     | 1,882<br>(1,249–2,623)     | 1,693<br>(1,127–2,363)     |
| Sexual abuse and violence                                                                    |                            |                            |                            |                            |                            |                            |                            |
| Childhood sexual abuse                                                                       |                            |                            |                            |                            |                            |                            |                            |
| Intimate partner violence                                                                    |                            |                            |                            |                            |                            |                            |                            |

**Web table 4: Global DALYs (in thousands) attributable to risk factors by age and sex in 1990**

| Risk                                         | Both Sexes,<br>50-54 Years | Both Sexes,<br>55-59 Years | Both Sexes,<br>60-64 Years | Both Sexes,<br>65-69 Years | Both Sexes,<br>70-74 Years | Both Sexes,<br>75-79 Years | Both Sexes,<br>80+ Years |
|----------------------------------------------|----------------------------|----------------------------|----------------------------|----------------------------|----------------------------|----------------------------|--------------------------|
| Unimproved water and sanitation              | 452<br>(21-835)            | 447<br>(22-847)            | 486<br>(22-896)            | 398<br>(21-748)            | 305<br>(14-558)            | 202<br>(9-372)             | 174<br>(9-324)           |
| Unimproved water source                      | 176<br>(12-345)            | 170<br>(11-342)            | 186<br>(13-372)            | 153<br>(11-309)            | 119<br>(8-236)             | 78<br>(5-155)              | 65<br>(4-130)            |
| Unimproved sanitation                        | 319<br>(9-613)             | 318<br>(10-623)            | 345<br>(10-670)            | 281<br>(9-549)             | 215<br>(7-412)             | 142<br>(4-275)             | 124<br>(4-241)           |
| Air pollution                                |                            |                            |                            |                            |                            |                            |                          |
| Ambient particulate matter pollution         | 5,582<br>(4,159-6,983)     | 6,563<br>(4,828-8,207)     | 7,885<br>(5,881-9,689)     | 7,377<br>(5,294-9,410)     | 6,221<br>(4,414-7,891)     | 5,100<br>(3,579-6,369)     | 4,489<br>(3,247-5,659)   |
| Household air pollution from solid fuels     | 7,668<br>(5,879-9,620)     | 9,110<br>(6,724-11,326)    | 10,997<br>(8,273-13,654)   | 10,538<br>(7,647-13,189)   | 9,314<br>(6,871-11,540)    | 6,777<br>(5,035-8,421)     | 5,289<br>(4,022-6,522)   |
| Ambient ozone pollution                      | 179<br>(57-314)            | 263<br>(88-456)            | 390<br>(129-683)           | 428<br>(142-748)           | 412<br>(134-726)           | 322<br>(108-565)           | 276<br>(91-492)          |
| Other environmental risks                    | 584<br>(489-684)           | 652<br>(553-771)           | 753<br>(634-879)           | 674<br>(574-786)           | 492<br>(419-573)           | 345<br>(297-399)           | 215<br>(182-249)         |
| Residential radon                            |                            |                            |                            |                            |                            |                            |                          |
| Lead exposure                                | 584<br>(489-684)           | 652<br>(553-771)           | 753<br>(634-879)           | 674<br>(574-786)           | 492<br>(419-573)           | 345<br>(297-399)           | 215<br>(182-249)         |
| Child and maternal undernutrition            | 1,025<br>(715-1,431)       | 850<br>(597-1,195)         | 739<br>(523-1,031)         | 552<br>(398-760)           | 407<br>(293-558)           | 313<br>(228-429)           | 272<br>(208-359)         |
| Suboptimal breastfeeding                     | 0<br>(0-0)                 | 0<br>(0-0)                 | 0<br>(0-0)                 | 0<br>(0-0)                 | 0<br>(0-0)                 | 0<br>(0-0)                 | 0<br>(0-0)               |
| Non-exclusive breastfeeding                  | 0<br>(0-0)                 | 0<br>(0-0)                 | 0<br>(0-0)                 | 0<br>(0-0)                 | 0<br>(0-0)                 | 0<br>(0-0)                 | 0<br>(0-0)               |
| Discontinued breastfeeding                   | 0<br>(0-0)                 | 0<br>(0-0)                 | 0<br>(0-0)                 | 0<br>(0-0)                 | 0<br>(0-0)                 | 0<br>(0-0)                 | 0<br>(0-0)               |
| Childhood underweight                        | 0<br>(0-0)                 | 0<br>(0-0)                 | 0<br>(0-0)                 | 0<br>(0-0)                 | 0<br>(0-0)                 | 0<br>(0-0)                 | 0<br>(0-0)               |
| Iron deficiency                              | 1,025<br>(715-1,431)       | 850<br>(597-1,195)         | 739<br>(523-1,031)         | 552<br>(398-760)           | 407<br>(293-558)           | 313<br>(228-429)           | 272<br>(208-359)         |
| Vitamin A deficiency                         | 0<br>(0-0)                 | 0<br>(0-0)                 | 0<br>(0-0)                 | 0<br>(0-0)                 | 0<br>(0-0)                 | 0<br>(0-0)                 | 0<br>(0-0)               |
| Zinc deficiency                              | 0<br>(0-0)                 | 0<br>(0-0)                 | 0<br>(0-0)                 | 0<br>(0-0)                 | 0<br>(0-0)                 | 0<br>(0-0)                 | 0<br>(0-0)               |
| Tobacco smoking, including second-hand smoke | 13,775<br>(11,866-15,749)  | 16,747<br>(14,544-19,051)  | 19,420<br>(17,017-22,411)  | 17,269<br>(14,981-20,070)  | 12,854<br>(11,100-15,231)  | 9,275<br>(8,069-11,039)    | 6,317<br>(5,609-7,452)   |
| Tobacco smoking                              | 13,135<br>(11,153-15,181)  | 15,969<br>(13,705-18,313)  | 18,428<br>(16,091-21,493)  | 16,226<br>(13,891-19,137)  | 11,891<br>(10,085-14,358)  | 8,357<br>(7,100-10,183)    | 5,431<br>(4,711-6,669)   |
| Second-hand smoke                            | 640<br>(422-839)           | 778<br>(520-1,030)         | 992<br>(672-1,284)         | 1,043<br>(691-1,349)       | 963<br>(643-1,255)         | 918<br>(606-1,193)         | 886<br>(596-1,145)       |
| Alcohol and drug use                         | 7,551<br>(6,782-8,397)     | 6,883<br>(6,195-7,606)     | 6,541<br>(5,886-7,238)     | 3,729<br>(3,256-4,217)     | 2,676<br>(2,260-3,120)     | 2,316<br>(1,900-2,745)     | 2,004<br>(1,502-2,487)   |
| Alcohol use                                  | 7,191<br>(6,451-8,008)     | 6,656<br>(5,994-7,356)     | 6,390<br>(5,716-7,108)     | 3,692<br>(3,224-4,180)     | 2,658<br>(2,243-3,100)     | 2,305<br>(1,890-2,735)     | 1,997<br>(1,493-2,477)   |

**Web table 4: Global DALYs (in thousands) attributable to risk factors by age and sex in 1990**

| Risk                                          | Both Sexes,<br>50-54 Years | Both Sexes,<br>55-59 Years | Both Sexes,<br>60-64 Years | Both Sexes,<br>65-69 Years | Both Sexes,<br>70-74 Years | Both Sexes,<br>75-79 Years | Both Sexes,<br>80+ Years  |
|-----------------------------------------------|----------------------------|----------------------------|----------------------------|----------------------------|----------------------------|----------------------------|---------------------------|
| Drug use                                      | 403<br>(320-520)           | 275<br>(226-336)           | 201<br>(167-247)           | 37<br>(27-55)              | 18<br>(13-30)              | 11<br>(8-22)               | 7<br>(5-14)               |
| Physiological risk factors                    |                            |                            |                            |                            |                            |                            |                           |
| High fasting plasma glucose                   | 5,699<br>(4,853-6,635)     | 7,319<br>(6,325-8,408)     | 8,204<br>(7,074-9,431)     | 7,678<br>(6,659-8,748)     | 6,090<br>(5,275-6,952)     | 5,005<br>(4,333-5,699)     | 3,997<br>(3,400-4,615)    |
| High total cholesterol                        | 3,963<br>(3,285-4,769)     | 4,637<br>(3,861-5,556)     | 5,950<br>(5,015-7,077)     | 5,642<br>(4,706-6,700)     | 4,509<br>(3,670-5,470)     | 4,113<br>(3,100-5,176)     | 3,675<br>(3,051-4,378)    |
| High blood pressure                           | 11,326<br>(9,986-12,688)   | 15,565<br>(14,144-17,099)  | 18,789<br>(17,122-20,518)  | 20,302<br>(18,779-21,990)  | 17,398<br>(15,983-18,870)  | 16,798<br>(15,609-18,085)  | 16,355<br>(15,177-17,548) |
| High body-mass index                          | 5,485<br>(4,299-6,699)     | 6,151<br>(4,895-7,441)     | 7,415<br>(5,987-8,869)     | 6,633<br>(5,354-7,911)     | 5,215<br>(4,214-6,238)     | 4,722<br>(3,819-5,642)     | 4,011<br>(3,189-4,849)    |
| Low bone mineral density                      | 364<br>(281-463)           | 410<br>(319-529)           | 469<br>(378-582)           | 477<br>(381-602)           | 406<br>(328-516)           | 440<br>(358-540)           | 559<br>(455-681)          |
| Dietary risk factors and physical inactivity  | 16,992<br>(15,592-18,348)  | 20,025<br>(18,412-21,778)  | 24,185<br>(22,361-26,078)  | 23,520<br>(21,692-25,406)  | 19,876<br>(18,142-21,541)  | 17,703<br>(16,251-19,023)  | 16,341<br>(14,856-17,805) |
| Diet low in fruits                            | 8,865<br>(7,020-10,585)    | 10,262<br>(8,115-12,234)   | 11,491<br>(9,021-13,818)   | 10,671<br>(8,317-12,855)   | 8,691<br>(6,689-10,512)    | 7,019<br>(5,413-8,526)     | 5,483<br>(4,176-6,823)    |
| Diet low in vegetables                        | 3,373<br>(2,203-4,537)     | 3,703<br>(2,407-4,992)     | 4,293<br>(2,897-5,702)     | 3,960<br>(2,663-5,335)     | 3,227<br>(2,117-4,333)     | 2,849<br>(1,889-3,787)     | 2,433<br>(1,566-3,288)    |
| Diet low in whole grains                      | 3,204<br>(2,538-3,827)     | 3,495<br>(2,760-4,199)     | 3,981<br>(3,119-4,769)     | 3,589<br>(2,799-4,334)     | 2,901<br>(2,272-3,508)     | 2,469<br>(1,919-2,996)     | 2,029<br>(1,558-2,461)    |
| Diet low in nuts and seeds                    | 4,147<br>(2,753-5,279)     | 4,592<br>(3,014-5,851)     | 5,573<br>(3,611-7,110)     | 5,277<br>(3,363-6,810)     | 4,257<br>(2,666-5,544)     | 3,872<br>(2,402-5,140)     | 3,670<br>(2,207-4,955)    |
| Diet low in milk                              | 158<br>(48-266)            | 190<br>(58-317)            | 220<br>(66-372)            | 205<br>(62-346)            | 159<br>(48-267)            | 131<br>(39-223)            | 94<br>(28-160)            |
| Diet high in red meat                         | 136<br>(62-219)            | 145<br>(68-228)            | 155<br>(73-241)            | 136<br>(63-209)            | 99<br>(47-154)             | 83<br>(37-128)             | 61<br>(27-94)             |
| Diet high in processed meat                   | 1,850<br>(553-3,006)       | 1,977<br>(582-3,193)       | 2,323<br>(651-3,828)       | 2,137<br>(573-3,531)       | 1,640<br>(428-2,730)       | 1,552<br>(394-2,589)       | 1,474<br>(356-2,515)      |
| Diet high in sugar-sweetened beverages        | 425<br>(150-669)           | 429<br>(275-680)           | 461<br>(287-739)           | 406<br>(242-646)           | 329<br>(182-558)           | 265<br>(128-407)           | 255<br>(102-334)          |
| Diet low in fibre                             | 1,456<br>(650-2,282)       | 1,544<br>(702-2,394)       | 1,734<br>(772-2,718)       | 1,553<br>(691-2,442)       | 1,262<br>(563-1,988)       | 1,103<br>(488-1,736)       | 991<br>(423-1,597)        |
| Diet low in calcium                           | 183<br>(135-235)           | 222<br>(163-285)           | 257<br>(186-332)           | 243<br>(171-316)           | 197<br>(137-262)           | 163<br>(109-223)           | 121<br>(76-169)           |
| Diet low in seafood omega-3 fatty acids       | 2,347<br>(1,696-3,006)     | 2,511<br>(1,829-3,186)     | 2,995<br>(2,178-3,847)     | 2,757<br>(2,008-3,521)     | 2,166<br>(1,573-2,776)     | 1,911<br>(1,371-2,443)     | 1,714<br>(1,223-2,202)    |
| Diet low in polyunsaturated fatty acids       | 1,055<br>(502-1,610)       | 1,144<br>(549-1,747)       | 1,348<br>(622-2,070)       | 1,242<br>(592-1,891)       | 979<br>(462-1,494)         | 871<br>(411-1,339)         | 790<br>(370-1,217)        |
| Diet high in trans fatty acids                | 844<br>(614-1,091)         | 932<br>(679-1,202)         | 1,086<br>(788-1,396)       | 1,040<br>(755-1,327)       | 829<br>(598-1,066)         | 689<br>(495-881)           | 630<br>(453-807)          |
| Diet high in sodium                           | 4,453<br>(2,952-5,835)     | 5,497<br>(3,617-7,226)     | 6,864<br>(4,470-8,965)     | 6,849<br>(4,424-9,125)     | 5,656<br>(3,657-7,497)     | 4,728<br>(3,033-6,330)     | 3,979<br>(2,500-5,385)    |
| Physical inactivity and low physical activity |                            |                            |                            |                            |                            |                            |                           |

**Web table 4: Global DALYs (in thousands) attributable to risk factors by age and sex in 1990**

| Risk                                                      | Both Sexes,<br>50-54 Years | Both Sexes,<br>55-59 Years | Both Sexes,<br>60-64 Years | Both Sexes,<br>65-69 Years | Both Sexes,<br>70-74 Years | Both Sexes,<br>75-79 Years | Both Sexes,<br>80+ Years |
|-----------------------------------------------------------|----------------------------|----------------------------|----------------------------|----------------------------|----------------------------|----------------------------|--------------------------|
| Occupational risk factors                                 | 4,538<br>(3,550-5,633)     | 4,182<br>(3,106-5,214)     | 3,631<br>(2,592-4,662)     | 2,002<br>(1,386-2,665)     | 1,659<br>(1,097-2,245)     | 1,063<br>(678-1,485)       | 52<br>(40-71)            |
| Occupational carcinogens                                  | 211<br>(142-304)           | 310<br>(205-439)           | 351<br>(238-505)           | 237<br>(166-331)           | 166<br>(117-243)           | 86<br>(64-121)             | 52<br>(40-71)            |
| Occupational exposure to asbestos                         | 44<br>(31-62)              | 60<br>(43-87)              | 77<br>(56-112)             | 81<br>(59-116)             | 58<br>(42-85)              | 47<br>(34-68)              | 30<br>(23-44)            |
| Occupational exposure to arsenic                          | 6<br>(2-10)                | 9<br>(3-16)                | 9<br>(4-18)                | 5<br>(2-10)                | 4<br>(1-7)                 | 1<br>(0-2)                 | 1<br>(0-1)               |
| Occupational exposure to benzene                          | 2<br>(1-4)                 | 3<br>(1-5)                 | 3<br>(1-5)                 | 3<br>(1-6)                 | 3<br>(1-5)                 | 3<br>(1-5)                 | 1<br>(0-2)               |
| Occupational exposure to beryllium                        | 0<br>(0-1)                 | 0<br>(0-1)                 | 1<br>(0-1)                 | 0<br>(0-0)                 | 0<br>(0-0)                 | 0<br>(0-0)                 | 0<br>(0-0)               |
| Occupational exposure to cadmium                          | 1<br>(0-2)                 | 2<br>(1-3)                 | 2<br>(1-3)                 | 1<br>(0-2)                 | 1<br>(0-1)                 | 0<br>(0-0)                 | 0<br>(0-0)               |
| Occupational exposure to chromium                         | 4<br>(2-5)                 | 5<br>(3-8)                 | 6<br>(4-9)                 | 3<br>(2-5)                 | 2<br>(1-4)                 | 1<br>(0-1)                 | 0<br>(0-1)               |
| Occupational exposure to diesel engine exhaust            | 46<br>(26-70)              | 69<br>(39-107)             | 76<br>(44-119)             | 42<br>(24-67)              | 29<br>(17-47)              | 10<br>(6-17)               | 6<br>(3-9)               |
| Occupational exposure to second-hand smoke                | 49<br>(33-68)              | 74<br>(52-103)             | 81<br>(58-115)             | 45<br>(31-65)              | 31<br>(22-47)              | 11<br>(8-16)               | 6<br>(4-9)               |
| Occupational exposure to formaldehyde                     | 1<br>(0-2)                 | 1<br>(0-2)                 | 1<br>(0-2)                 | 1<br>(0-2)                 | 1<br>(0-1)                 | 1<br>(0-1)                 | 0<br>(0-0)               |
| Occupational exposure to nickel                           | 18<br>(5-36)               | 27<br>(7-55)               | 29<br>(8-60)               | 16<br>(4-34)               | 11<br>(3-24)               | 4<br>(1-8)                 | 2<br>(1-5)               |
| Occupational exposure to polycyclic aromatic hydrocarbons | 7<br>(3-12)                | 11<br>(5-19)               | 12<br>(6-21)               | 7<br>(3-12)                | 5<br>(2-8)                 | 2<br>(1-3)                 | 1<br>(0-2)               |
| Occupational exposure to silica                           | 31<br>(20-45)              | 48<br>(31-69)              | 53<br>(35-76)              | 29<br>(19-44)              | 20<br>(14-31)              | 7<br>(5-11)                | 4<br>(3-6)               |
| Occupational exposure to sulfuric acid                    | 9<br>(3-20)                | 11<br>(3-24)               | 12<br>(3-26)               | 7<br>(2-16)                | 4<br>(1-10)                | 2<br>(0-4)                 | 1<br>(0-2)               |
| Occupational asthmagens                                   | 203<br>(128-343)           | 208<br>(127-344)           | 192<br>(115-337)           | 112<br>(64-197)            | 92<br>(52-160)             | 61<br>(35-109)             | 0<br>(0-0)               |
| Occupational particulate matter, gases, and fumes         | 1,170<br>(555-1,779)       | 1,407<br>(649-2,167)       | 1,545<br>(698-2,392)       | 960<br>(420-1,559)         | 901<br>(389-1,455)         | 650<br>(285-1,048)         | 0<br>(0-0)               |
| Occupational noise                                        | 320<br>(190-500)           | 218<br>(124-349)           | 217<br>(122-345)           | 87<br>(50-143)             | 83<br>(47-135)             | 19<br>(8-35)               | 0<br>(0-0)               |
| Occupational risk factors for injuries                    | 1,004<br>(765-1,288)       | 679<br>(514-880)           | 355<br>(269-458)           | 128<br>(95-170)            | 68<br>(51-90)              | 16<br>(12-20)              | 0<br>(0-0)               |
| Occupational low back pain                                | 1,629<br>(1,093-2,277)     | 1,361<br>(911-1,912)       | 971<br>(646-1,376)         | 478<br>(310-689)           | 349<br>(226-502)           | 230<br>(149-329)           | 0<br>(0-0)               |
| Sexual abuse and violence                                 |                            |                            |                            |                            |                            |                            |                          |
| Childhood sexual abuse                                    |                            |                            |                            |                            |                            |                            |                          |
| Intimate partner violence                                 |                            |                            |                            |                            |                            |                            |                          |

**Web table 4: Global DALYs (in thousands) attributable to risk factors by age and sex in 1990**

| Risk                                         | Males,<br>All Ages           | Males,<br>0-6 Days     | Males,<br>7-27 Days      | Males,<br>28-364 Days     | Males,<br>1-4 Years       | Males,<br>5-9 Years    | Males,<br>10-14 Years  |
|----------------------------------------------|------------------------------|------------------------|--------------------------|---------------------------|---------------------------|------------------------|------------------------|
| Unimproved water and sanitation              | 27,045<br>(1,409-49,439)     | 839<br>(41-1,659)      | 2,035<br>(106-3,844)     | 10,145<br>(537-18,838)    | 8,709<br>(465-16,072)     | 1,266<br>(57-2,411)    | 526<br>(22-1,017)      |
| Unimproved water source                      | 11,075<br>(792-21,250)       | 337<br>(23-704)        | 811<br>(56-1,624)        | 4,157<br>(303-8,120)      | 3,713<br>(270-7,302)      | 492<br>(33-990)        | 206<br>(13-424)        |
| Unimproved sanitation                        | 18,610<br>(593-35,486)       | 583<br>(17-1,213)      | 1,418<br>(46-2,825)      | 6,962<br>(222-13,557)     | 5,895<br>(193-11,473)     | 892<br>(24-1,762)      | 368<br>(9-736)         |
| Air pollution                                |                              |                        |                          |                           |                           |                        |                        |
| Ambient particulate matter pollution         | 46,667<br>(40,185-53,381)    | 1,710<br>(1,057-2,431) | 1,739<br>(1,135-2,409)   | 6,727<br>(4,555-9,113)    | 4,362<br>(2,893-6,030)    | 0<br>(0-0)             | 0<br>(0-0)             |
| Household air pollution from solid fuels     | 91,432<br>(71,850-109,298)   | 5,936<br>(3,829-7,906) | 6,141<br>(4,125-8,001)   | 23,627<br>(16,670-30,164) | 16,288<br>(11,339-21,432) | 0<br>(0-0)             | 0<br>(0-0)             |
| Ambient ozone pollution                      | 1,409<br>(460-2,456)         | 0<br>(0-0)             | 0<br>(0-0)               | 0<br>(0-0)                | 0<br>(0-0)                | 0<br>(0-0)             | 0<br>(0-0)             |
| Other environmental risks                    | 2,876<br>(2,406-3,459)       | 0<br>(0-0)             | 0<br>(0-0)               | 0<br>(0-0)                | 5<br>(2-10)               | 16<br>(8-27)           | 10<br>(5-17)           |
| Residential radon                            |                              |                        |                          |                           |                           |                        |                        |
| Lead exposure                                | 2,876<br>(2,406-3,459)       | 0<br>(0-0)             | 0<br>(0-0)               | 0<br>(0-0)                | 5<br>(2-10)               | 16<br>(8-27)           | 10<br>(5-17)           |
| Child and maternal undernutrition            | 175,366<br>(146,049-211,406) | 0<br>(0-0)             | 11,943<br>(7,210-16,418) | 79,554<br>(65,288-95,221) | 70,667<br>(57,021-91,212) | 4,092<br>(2,717-5,950) | 2,759<br>(1,840-4,025) |
| Suboptimal breastfeeding                     | 59,902<br>(36,953-84,059)    | 0<br>(0-0)             | 11,942<br>(7,209-16,417) | 44,001<br>(26,545-62,907) | 3,959<br>(425-8,431)      | 0<br>(0-0)             | 0<br>(0-0)             |
| Non-exclusive breastfeeding                  | 52,729<br>(30,540-75,288)    | 0<br>(0-0)             | 11,942<br>(7,209-16,417) | 40,787<br>(23,469-59,694) | 0<br>(0-0)                | 0<br>(0-0)             | 0<br>(0-0)             |
| Discontinued breastfeeding                   | 7,173<br>(767-15,819)        | 0<br>(0-0)             | 0<br>(0-0)               | 3,214<br>(321-7,183)      | 3,959<br>(425-8,431)      | 0<br>(0-0)             | 0<br>(0-0)             |
| Childhood underweight                        | 104,713<br>(87,668-128,697)  | 0<br>(0-0)             | 0<br>(0-0)               | 52,369<br>(43,805-61,923) | 52,344<br>(41,987-67,060) | 0<br>(0-0)             | 0<br>(0-0)             |
| Iron deficiency                              | 21,451<br>(14,947-30,321)    | 0<br>(0-0)             | 1<br>(0-1)               | 2,175<br>(1,596-2,957)    | 6,072<br>(4,244-8,518)    | 4,092<br>(2,717-5,950) | 2,759<br>(1,840-4,025) |
| Vitamin A deficiency                         | 15,689<br>(7,475-29,165)     | 0<br>(0-0)             | 0<br>(0-0)               | 3,945<br>(1,802-6,813)    | 11,744<br>(5,410-22,805)  | 0<br>(0-0)             | 0<br>(0-0)             |
| Zinc deficiency                              | 12,666<br>(2,938-23,883)     | 0<br>(0-0)             | 0<br>(0-0)               | 0<br>(0-0)                | 12,666<br>(2,938-23,883)  | 0<br>(0-0)             | 0<br>(0-0)             |
| Tobacco smoking, including second-hand smoke | 104,840<br>(91,849-119,255)  | 1,855<br>(1,146-2,571) | 1,953<br>(1,274-2,671)   | 8,008<br>(5,455-10,613)   | 4,943<br>(3,281-6,727)    | 0<br>(0-0)             | 0<br>(0-0)             |
| Tobacco smoking                              | 84,956<br>(73,038-97,937)    | 0<br>(0-0)             | 0<br>(0-0)               | 0<br>(0-0)                | 0<br>(0-0)                | 0<br>(0-0)             | 0<br>(0-0)             |
| Second-hand smoke                            | 19,884<br>(14,493-25,591)    | 1,855<br>(1,146-2,571) | 1,953<br>(1,274-2,671)   | 8,008<br>(5,455-10,613)   | 4,943<br>(3,281-6,727)    | 0<br>(0-0)             | 0<br>(0-0)             |
| Alcohol and drug use                         | 65,660<br>(57,545-73,925)    | 21<br>(12-39)          | 18<br>(8-34)             | 81<br>(46-150)            | 305<br>(172-486)          | 173<br>(130-232)       | 364<br>(284-469)       |
| Alcohol use                                  | 55,770<br>(49,280-62,723)    | 11<br>(7-18)           | 6<br>(3-11)              | 48<br>(30-74)             | 238<br>(137-379)          | 153<br>(117-192)       | 304<br>(239-383)       |

**Web table 4: Global DALYs (in thousands) attributable to risk factors by age and sex in 1990**

| Risk                                          | Males,<br>All Ages          | Males,<br>0-6 Days | Males,<br>7-27 Days | Males,<br>28-364 Days | Males,<br>1-4 Years | Males,<br>5-9 Years | Males,<br>10-14 Years |
|-----------------------------------------------|-----------------------------|--------------------|---------------------|-----------------------|---------------------|---------------------|-----------------------|
| Drug use                                      | 10,178<br>(7,787–13,073)    | 10<br>(3–25)       | 12<br>(3–26)        | 33<br>(11–91)         | 67<br>(16–159)      | 20<br>(6–55)        | 60<br>(37–98)         |
| Physiological risk factors                    |                             |                    |                     |                       |                     |                     |                       |
| High fasting plasma glucose                   | 30,177<br>(25,148–34,980)   | 0<br>(0–0)         | 0<br>(0–0)          | 0<br>(0–0)            | 0<br>(0–0)          | 0<br>(0–0)          | 0<br>(0–0)            |
| High total cholesterol                        | 22,519<br>(18,230–27,029)   | 0<br>(0–0)         | 0<br>(0–0)          | 0<br>(0–0)            | 0<br>(0–0)          | 0<br>(0–0)          | 0<br>(0–0)            |
| High blood pressure                           | 73,120<br>(65,538–81,302)   | 0<br>(0–0)         | 0<br>(0–0)          | 0<br>(0–0)            | 0<br>(0–0)          | 0<br>(0–0)          | 0<br>(0–0)            |
| High body-mass index                          | 25,391<br>(19,752–31,108)   | 0<br>(0–0)         | 0<br>(0–0)          | 0<br>(0–0)            | 0<br>(0–0)          | 0<br>(0–0)          | 0<br>(0–0)            |
| Low bone mineral density                      | 1,764<br>(1,448–2,208)      | 0<br>(0–0)         | 0<br>(0–0)          | 0<br>(0–0)            | 0<br>(0–0)          | 0<br>(0–0)          | 0<br>(0–0)            |
| Dietary risk factors and physical inactivity  | 100,320<br>(92,232–108,625) | 0<br>(0–0)         | 0<br>(0–0)          | 0<br>(0–0)            | 0<br>(0–0)          | 0<br>(0–0)          | 0<br>(0–0)            |
| Diet low in fruits                            | 47,979<br>(37,530–57,842)   | 0<br>(0–0)         | 0<br>(0–0)          | 0<br>(0–0)            | 0<br>(0–0)          | 0<br>(0–0)          | 0<br>(0–0)            |
| Diet low in vegetables                        | 18,755<br>(12,859–24,939)   | 0<br>(0–0)         | 0<br>(0–0)          | 0<br>(0–0)            | 0<br>(0–0)          | 0<br>(0–0)          | 0<br>(0–0)            |
| Diet low in whole grains                      | 17,033<br>(13,513–20,522)   | 0<br>(0–0)         | 0<br>(0–0)          | 0<br>(0–0)            | 0<br>(0–0)          | 0<br>(0–0)          | 0<br>(0–0)            |
| Diet low in nuts and seeds                    | 24,918<br>(16,268–31,946)   | 0<br>(0–0)         | 0<br>(0–0)          | 0<br>(0–0)            | 0<br>(0–0)          | 0<br>(0–0)          | 0<br>(0–0)            |
| Diet low in milk                              | 818<br>(248–1,366)          | 0<br>(0–0)         | 0<br>(0–0)          | 0<br>(0–0)            | 0<br>(0–0)          | 0<br>(0–0)          | 0<br>(0–0)            |
| Diet high in red meat                         | 642<br>(306–1,014)          | 0<br>(0–0)         | 0<br>(0–0)          | 0<br>(0–0)            | 0<br>(0–0)          | 0<br>(0–0)          | 0<br>(0–0)            |
| Diet high in processed meat                   | 10,477<br>(2,801–17,479)    | 0<br>(0–0)         | 0<br>(0–0)          | 0<br>(0–0)            | 0<br>(0–0)          | 0<br>(0–0)          | 0<br>(0–0)            |
| Diet high in sugar-sweetened beverages        | 2,250<br>(1,365–3,267)      | 0<br>(0–0)         | 0<br>(0–0)          | 0<br>(0–0)            | 0<br>(0–0)          | 0<br>(0–0)          | 0<br>(0–0)            |
| Diet low in fibre                             | 8,485<br>(3,787–13,262)     | 0<br>(0–0)         | 0<br>(0–0)          | 0<br>(0–0)            | 0<br>(0–0)          | 0<br>(0–0)          | 0<br>(0–0)            |
| Diet low in calcium                           | 1,083<br>(752–1,406)        | 0<br>(0–0)         | 0<br>(0–0)          | 0<br>(0–0)            | 0<br>(0–0)          | 0<br>(0–0)          | 0<br>(0–0)            |
| Diet low in seafood omega-3 fatty acids       | 13,620<br>(9,915–17,307)    | 0<br>(0–0)         | 0<br>(0–0)          | 0<br>(0–0)            | 0<br>(0–0)          | 0<br>(0–0)          | 0<br>(0–0)            |
| Diet low in polyunsaturated fatty acids       | 6,185<br>(2,891–9,362)      | 0<br>(0–0)         | 0<br>(0–0)          | 0<br>(0–0)            | 0<br>(0–0)          | 0<br>(0–0)          | 0<br>(0–0)            |
| Diet high in trans fatty acids                | 4,979<br>(3,571–6,413)      | 0<br>(0–0)         | 0<br>(0–0)          | 0<br>(0–0)            | 0<br>(0–0)          | 0<br>(0–0)          | 0<br>(0–0)            |
| Diet high in sodium                           | 26,807<br>(17,646–35,273)   | 0<br>(0–0)         | 0<br>(0–0)          | 0<br>(0–0)            | 0<br>(0–0)          | 0<br>(0–0)          | 0<br>(0–0)            |
| Physical inactivity and low physical activity |                             |                    |                     |                       |                     |                     |                       |



**Web table 4: Global DALYs (in thousands) attributable to risk factors by age and sex in 1990**

| Risk                                                      | Males,<br>All Ages        | Males,<br>0-6 Days | Males,<br>7-27 Days | Males,<br>28-364 Days | Males,<br>1-4 Years | Males,<br>5-9 Years | Males,<br>10-14 Years |
|-----------------------------------------------------------|---------------------------|--------------------|---------------------|-----------------------|---------------------|---------------------|-----------------------|
| Occupational risk factors                                 | 42,660<br>(35,146–50,545) | 0<br>(0–0)         | 0<br>(0–0)          | 0<br>(0–0)            | 0<br>(0–0)          | 0<br>(0–0)          | 0<br>(0–0)            |
| Occupational carcinogens                                  | 1,346<br>(917–1,958)      | 0<br>(0–0)         | 0<br>(0–0)          | 0<br>(0–0)            | 0<br>(0–0)          | 0<br>(0–0)          | 0<br>(0–0)            |
| Occupational exposure to asbestos                         | 362<br>(236–555)          | 0<br>(0–0)         | 0<br>(0–0)          | 0<br>(0–0)            | 0<br>(0–0)          | 0<br>(0–0)          | 0<br>(0–0)            |
| Occupational exposure to arsenic                          | 29<br>(11–56)             | 0<br>(0–0)         | 0<br>(0–0)          | 0<br>(0–0)            | 0<br>(0–0)          | 0<br>(0–0)          | 0<br>(0–0)            |
| Occupational exposure to benzene                          | 36<br>(15–64)             | 0<br>(0–0)         | 0<br>(0–0)          | 0<br>(0–0)            | 0<br>(0–0)          | 0<br>(0–0)          | 0<br>(0–0)            |
| Occupational exposure to beryllium                        | 2<br>(1–3)                | 0<br>(0–0)         | 0<br>(0–0)          | 0<br>(0–0)            | 0<br>(0–0)          | 0<br>(0–0)          | 0<br>(0–0)            |
| Occupational exposure to cadmium                          | 5<br>(2–9)                | 0<br>(0–0)         | 0<br>(0–0)          | 0<br>(0–0)            | 0<br>(0–0)          | 0<br>(0–0)          | 0<br>(0–0)            |
| Occupational exposure to chromium                         | 18<br>(11–28)             | 0<br>(0–0)         | 0<br>(0–0)          | 0<br>(0–0)            | 0<br>(0–0)          | 0<br>(0–0)          | 0<br>(0–0)            |
| Occupational exposure to diesel engine exhaust            | 278<br>(158–436)          | 0<br>(0–0)         | 0<br>(0–0)          | 0<br>(0–0)            | 0<br>(0–0)          | 0<br>(0–0)          | 0<br>(0–0)            |
| Occupational exposure to second-hand smoke                | 257<br>(173–383)          | 0<br>(0–0)         | 0<br>(0–0)          | 0<br>(0–0)            | 0<br>(0–0)          | 0<br>(0–0)          | 0<br>(0–0)            |
| Occupational exposure to formaldehyde                     | 11<br>(4–20)              | 0<br>(0–0)         | 0<br>(0–0)          | 0<br>(0–0)            | 0<br>(0–0)          | 0<br>(0–0)          | 0<br>(0–0)            |
| Occupational exposure to nickel                           | 90<br>(24–191)            | 0<br>(0–0)         | 0<br>(0–0)          | 0<br>(0–0)            | 0<br>(0–0)          | 0<br>(0–0)          | 0<br>(0–0)            |
| Occupational exposure to polycyclic aromatic hydrocarbons | 41<br>(19–71)             | 0<br>(0–0)         | 0<br>(0–0)          | 0<br>(0–0)            | 0<br>(0–0)          | 0<br>(0–0)          | 0<br>(0–0)            |
| Occupational exposure to silica                           | 199<br>(129–297)          | 0<br>(0–0)         | 0<br>(0–0)          | 0<br>(0–0)            | 0<br>(0–0)          | 0<br>(0–0)          | 0<br>(0–0)            |
| Occupational exposure to sulfuric acid                    | 52<br>(14–114)            | 0<br>(0–0)         | 0<br>(0–0)          | 0<br>(0–0)            | 0<br>(0–0)          | 0<br>(0–0)          | 0<br>(0–0)            |
| Occupational asthmagens                                   | 1,467<br>(874–2,439)      | 0<br>(0–0)         | 0<br>(0–0)          | 0<br>(0–0)            | 0<br>(0–0)          | 0<br>(0–0)          | 0<br>(0–0)            |
| Occupational particulate matter, gases, and fumes         | 6,808<br>(3,162–10,425)   | 0<br>(0–0)         | 0<br>(0–0)          | 0<br>(0–0)            | 0<br>(0–0)          | 0<br>(0–0)          | 0<br>(0–0)            |
| Occupational noise                                        | 1,936<br>(1,149–3,103)    | 0<br>(0–0)         | 0<br>(0–0)          | 0<br>(0–0)            | 0<br>(0–0)          | 0<br>(0–0)          | 0<br>(0–0)            |
| Occupational risk factors for injuries                    | 20,175<br>(15,588–25,639) | 0<br>(0–0)         | 0<br>(0–0)          | 0<br>(0–0)            | 0<br>(0–0)          | 0<br>(0–0)          | 0<br>(0–0)            |
| Occupational low back pain                                | 10,929<br>(7,340–15,116)  | 0<br>(0–0)         | 0<br>(0–0)          | 0<br>(0–0)            | 0<br>(0–0)          | 0<br>(0–0)          | 0<br>(0–0)            |
| Sexual abuse and violence                                 |                           |                    |                     |                       |                     |                     |                       |
| Childhood sexual abuse                                    |                           |                    |                     |                       |                     |                     |                       |
| Intimate partner violence                                 |                           |                    |                     |                       |                     |                     |                       |

**Web table 4: Global DALYs (in thousands) attributable to risk factors by age and sex in 1990**

| Risk                                         | Males,<br>15-19 Years  | Males,<br>20-24 Years  | Males,<br>25-29 Years  | Males,<br>30-34 Years  | Males,<br>35-39 Years  | Males,<br>40-44 Years  | Males,<br>45-49 Years  |
|----------------------------------------------|------------------------|------------------------|------------------------|------------------------|------------------------|------------------------|------------------------|
| Unimproved water and sanitation              | 442<br>(18-869)        | 421<br>(19-814)        | 381<br>(19-730)        | 345<br>(16-649)        | 315<br>(16-596)        | 255<br>(13-490)        | 240<br>(12-475)        |
| Unimproved water source                      | 172<br>(10-358)        | 164<br>(11-335)        | 149<br>(10-309)        | 134<br>(8-272)         | 121<br>(9-243)         | 99<br>(7-201)          | 92<br>(6-193)          |
| Unimproved sanitation                        | 310<br>(8-632)         | 296<br>(8-599)         | 268<br>(8-535)         | 244<br>(7-475)         | 223<br>(7-436)         | 180<br>(6-366)         | 170<br>(5-349)         |
| Air pollution                                |                        |                        |                        |                        |                        |                        |                        |
| Ambient particulate matter pollution         | 0<br>(0-0)             | 0<br>(0-0)             | 766<br>(560-971)       | 1,076<br>(794-1,345)   | 1,481<br>(1,129-1,840) | 1,933<br>(1,441-2,426) | 2,338<br>(1,738-2,905) |
| Household air pollution from solid fuels     | 0<br>(0-0)             | 0<br>(0-0)             | 1,087<br>(755-1,425)   | 1,440<br>(1,010-1,892) | 1,862<br>(1,316-2,459) | 2,312<br>(1,612-2,990) | 2,811<br>(1,983-3,615) |
| Ambient ozone pollution                      | 0<br>(0-0)             | 0<br>(0-0)             | 12<br>(4-23)           | 15<br>(5-28)           | 25<br>(8-47)           | 34<br>(11-64)          | 55<br>(16-98)          |
| Other environmental risks                    | 0<br>(0-0)             | 0<br>(0-0)             | 79<br>(63-109)         | 112<br>(89-145)        | 149<br>(122-182)       | 197<br>(164-237)       | 246<br>(203-300)       |
| Residential radon                            |                        |                        |                        |                        |                        |                        |                        |
| Lead exposure                                | 0<br>(0-0)             | 0<br>(0-0)             | 79<br>(63-109)         | 112<br>(89-145)        | 149<br>(122-182)       | 197<br>(164-237)       | 246<br>(203-300)       |
| Child and maternal undernutrition            | 1,188<br>(817-1,705)   | 857<br>(590-1,203)     | 671<br>(466-939)       | 591<br>(414-829)       | 541<br>(377-758)       | 434<br>(302-611)       | 396<br>(277-552)       |
| Suboptimal breastfeeding                     | 0<br>(0-0)             |
| Non-exclusive breastfeeding                  | 0<br>(0-0)             |
| Discontinued breastfeeding                   | 0<br>(0-0)             |
| Childhood underweight                        | 0<br>(0-0)             |
| Iron deficiency                              | 1,188<br>(817-1,705)   | 857<br>(590-1,203)     | 671<br>(466-939)       | 591<br>(414-829)       | 541<br>(377-758)       | 434<br>(302-611)       | 396<br>(277-552)       |
| Vitamin A deficiency                         | 0<br>(0-0)             |
| Zinc deficiency                              | 0<br>(0-0)             |
| Tobacco smoking, including second-hand smoke | 0<br>(0-0)             | 0<br>(0-0)             | 80<br>(53-107)         | 2,425<br>(1,739-3,233) | 3,754<br>(2,345-5,327) | 5,830<br>(4,456-7,292) | 7,233<br>(6,166-8,467) |
| Tobacco smoking                              | 0<br>(0-0)             | 0<br>(0-0)             | 0<br>(0-0)             | 2,320<br>(1,639-3,138) | 3,669<br>(2,253-5,239) | 5,705<br>(4,313-7,150) | 7,067<br>(5,994-8,292) |
| Second-hand smoke                            | 0<br>(0-0)             | 0<br>(0-0)             | 80<br>(53-107)         | 105<br>(71-142)        | 85<br>(55-124)         | 125<br>(84-172)        | 165<br>(112-221)       |
| Alcohol and drug use                         | 4,321<br>(3,612-5,139) | 7,072<br>(5,928-8,342) | 7,000<br>(5,876-8,218) | 6,286<br>(5,368-7,263) | 7,145<br>(6,150-8,231) | 6,111<br>(5,341-6,928) | 5,465<br>(4,815-6,136) |
| Alcohol use                                  | 3,518<br>(2,928-4,166) | 4,820<br>(4,017-5,674) | 4,708<br>(3,971-5,515) | 4,620<br>(3,935-5,350) | 6,032<br>(5,225-6,942) | 5,462<br>(4,798-6,245) | 5,090<br>(4,484-5,751) |
| Drug use                                     | 812<br>(601-1,087)     | 2,287<br>(1,723-2,916) | 2,330<br>(1,762-2,983) | 1,695<br>(1,277-2,190) | 1,146<br>(868-1,482)   | 674<br>(516-870)       | 401<br>(310-520)       |

**Web table 4: Global DALYs (in thousands) attributable to risk factors by age and sex in 1990**

| Risk                                          | Males,<br>15-19 Years  | Males,<br>20-24 Years  | Males,<br>25-29 Years  | Males,<br>30-34 Years  | Males,<br>35-39 Years  | Males,<br>40-44 Years  | Males,<br>45-49 Years  |
|-----------------------------------------------|------------------------|------------------------|------------------------|------------------------|------------------------|------------------------|------------------------|
| Physiological risk factors                    |                        |                        |                        |                        |                        |                        |                        |
| High fasting plasma glucose                   | 0<br>(0-0)             | 0<br>(0-0)             | 649<br>(517-787)       | 863<br>(698-1,055)     | 1,511<br>(1,237-1,811) | 1,746<br>(1,433-2,089) | 2,601<br>(2,156-3,047) |
| High total cholesterol                        | 0<br>(0-0)             | 0<br>(0-0)             | 317<br>(226-422)       | 514<br>(372-673)       | 1,045<br>(831-1,273)   | 1,439<br>(1,143-1,762) | 1,868<br>(1,509-2,274) |
| High blood pressure                           | 0<br>(0-0)             | 0<br>(0-0)             | 1,166<br>(899-1,435)   | 1,545<br>(1,210-1,865) | 2,536<br>(2,112-2,979) | 3,202<br>(2,684-3,761) | 4,839<br>(4,234-5,523) |
| High body-mass index                          | 0<br>(0-0)             | 0<br>(0-0)             | 586<br>(404-784)       | 785<br>(545-1,041)     | 1,392<br>(1,045-1,756) | 1,821<br>(1,360-2,302) | 2,201<br>(1,695-2,728) |
| Low bone mineral density                      | 0<br>(0-0)             |
| Dietary risk factors and physical inactivity  |                        |                        |                        |                        |                        |                        |                        |
| Diet low in fruits                            | 0<br>(0-0)             | 0<br>(0-0)             | 1,922<br>(1,707-2,128) | 2,849<br>(2,542-3,129) | 4,120<br>(3,725-4,525) | 5,633<br>(5,111-6,197) | 7,266<br>(6,573-7,991) |
| Diet low in vegetables                        | 0<br>(0-0)             | 0<br>(0-0)             | 1,070<br>(834-1,310)   | 1,522<br>(1,177-1,845) | 2,150<br>(1,648-2,610) | 2,922<br>(2,270-3,577) | 3,794<br>(2,913-4,636) |
| Diet low in whole grains                      | 0<br>(0-0)             | 0<br>(0-0)             | 536<br>(334-719)       | 734<br>(489-980)       | 970<br>(631-1,305)     | 1,248<br>(822-1,655)   | 1,531<br>(993-2,069)   |
| Diet low in nuts and seeds                    | 0<br>(0-0)             | 0<br>(0-0)             | 504<br>(395-606)       | 721<br>(562-869)       | 983<br>(767-1,191)     | 1,244<br>(960-1,519)   | 1,448<br>(1,132-1,756) |
| Diet low in milk                              | 0<br>(0-0)             | 0<br>(0-0)             | 595<br>(403-749)       | 901<br>(599-1,123)     | 1,259<br>(838-1,587)   | 1,672<br>(1,112-2,141) | 1,993<br>(1,320-2,533) |
| Diet high in red meat                         | 0<br>(0-0)             | 0<br>(0-0)             | 21<br>(6-36)           | 32<br>(9-55)           | 40<br>(12-67)          | 47<br>(14-78)          | 61<br>(18-100)         |
| Diet high in processed meat                   | 0<br>(0-0)             | 0<br>(0-0)             | 22<br>(9-37)           | 33<br>(14-57)          | 47<br>(20-80)          | 55<br>(22-92)          | 60<br>(27-97)          |
| Diet high in sugar-sweetened beverages        | 0<br>(0-0)             | 0<br>(0-0)             | 252<br>(82-418)        | 413<br>(133-695)       | 595<br>(186-983)       | 802<br>(234-1,373)     | 924<br>(257-1,540)     |
| Diet low in fibre                             | 0<br>(0-0)             | 0<br>(0-0)             | 93<br>(61-133)         | 112<br>(78-152)        | 144<br>(54-225)        | 175<br>(62-275)        | 206<br>(74-318)        |
| Diet low in calcium                           | 0<br>(0-0)             | 0<br>(0-0)             | 270<br>(125-418)       | 391<br>(179-603)       | 532<br>(240-828)       | 660<br>(289-1,021)     | 750<br>(325-1,179)     |
| Diet low in seafood omega-3 fatty acids       | 0<br>(0-0)             | 0<br>(0-0)             | 28<br>(17-36)          | 41<br>(25-54)          | 51<br>(33-67)          | 58<br>(40-73)          | 73<br>(53-92)          |
| Diet low in polyunsaturated fatty acids       | 0<br>(0-0)             | 0<br>(0-0)             | 362<br>(260-456)       | 543<br>(389-685)       | 747<br>(542-940)       | 991<br>(728-1,275)     | 1,161<br>(830-1,481)   |
| Diet high in trans fatty acids                | 0<br>(0-0)             | 0<br>(0-0)             | 175<br>(83-264)        | 254<br>(121-382)       | 348<br>(163-525)       | 451<br>(209-685)       | 526<br>(246-809)       |
| Diet high in sodium                           | 0<br>(0-0)             | 0<br>(0-0)             | 126<br>(88-162)        | 189<br>(133-242)       | 265<br>(188-342)       | 364<br>(262-468)       | 437<br>(310-564)       |
| Physical inactivity and low physical activity | 0<br>(0-0)             | 0<br>(0-0)             | 339<br>(153-542)       | 574<br>(325-834)       | 914<br>(569-1,267)     | 1,333<br>(866-1,800)   | 1,815<br>(1,213-2,403) |
| Occupational risk factors                     | 3,837<br>(3,091-4,730) | 5,176<br>(4,102-6,320) | 5,184<br>(4,216-6,309) | 4,710<br>(3,843-5,738) | 4,338<br>(3,509-5,261) | 3,524<br>(2,841-4,303) | 3,150<br>(2,553-3,844) |
| Occupational carcinogens                      | 9<br>(6-13)            | 12<br>(8-18)           | 15<br>(10-22)          | 18<br>(12-25)          | 33<br>(21-47)          | 52<br>(34-75)          | 99<br>(65-144)         |

**Web table 4: Global DALYs (in thousands) attributable to risk factors by age and sex in 1990**

| Risk                                                      | Males,<br>15-19 Years  | Males,<br>20-24 Years  | Males,<br>25-29 Years  | Males,<br>30-34 Years  | Males,<br>35-39 Years  | Males,<br>40-44 Years  | Males,<br>45-49 Years |
|-----------------------------------------------------------|------------------------|------------------------|------------------------|------------------------|------------------------|------------------------|-----------------------|
| Occupational exposure to asbestos                         | 4<br>(3-8)             | 5<br>(3-8)             | 4<br>(2-7)             | 5<br>(3-8)             | 8<br>(5-12)            | 13<br>(8-20)           | 21<br>(13-32)         |
| Occupational exposure to arsenic                          | 0<br>(0-0)             | 0<br>(0-0)             | 0<br>(0-0)             | 0<br>(0-0)             | 1<br>(0-1)             | 1<br>(0-2)             | 2<br>(1-4)            |
| Occupational exposure to benzene                          | 4<br>(2-7)             | 6<br>(2-11)            | 5<br>(2-10)            | 5<br>(2-8)             | 2<br>(1-5)             | 2<br>(1-4)             | 1<br>(0-2)            |
| Occupational exposure to beryllium                        | 0<br>(0-0)             | 0<br>(0-0)             | 0<br>(0-0)             | 0<br>(0-0)             | 0<br>(0-0)             | 0<br>(0-0)             | 0<br>(0-0)            |
| Occupational exposure to cadmium                          | 0<br>(0-0)             | 0<br>(0-0)             | 0<br>(0-0)             | 0<br>(0-0)             | 0<br>(0-0)             | 0<br>(0-0)             | 0<br>(0-1)            |
| Occupational exposure to chromium                         | 0<br>(0-0)             | 0<br>(0-0)             | 0<br>(0-0)             | 0<br>(0-0)             | 0<br>(0-1)             | 1<br>(0-1)             | 1<br>(1-2)            |
| Occupational exposure to diesel engine exhaust            | 0<br>(0-0)             | 0<br>(0-0)             | 1<br>(1-2)             | 2<br>(1-3)             | 7<br>(4-10)            | 10<br>(6-17)           | 22<br>(12-35)         |
| Occupational exposure to second-hand smoke                | 0<br>(0-0)             | 0<br>(0-0)             | 1<br>(1-2)             | 2<br>(1-3)             | 6<br>(4-9)             | 10<br>(6-14)           | 21<br>(14-30)         |
| Occupational exposure to formaldehyde                     | 1<br>(0-1)             | 1<br>(1-2)             | 1<br>(1-2)             | 1<br>(1-2)             | 1<br>(0-2)             | 1<br>(0-2)             | 1<br>(0-1)            |
| Occupational exposure to nickel                           | 0<br>(0-0)             | 0<br>(0-0)             | 0<br>(0-1)             | 1<br>(0-1)             | 2<br>(1-4)             | 3<br>(1-7)             | 7<br>(2-15)           |
| Occupational exposure to polycyclic aromatic hydrocarbons | 0<br>(0-0)             | 0<br>(0-0)             | 0<br>(0-0)             | 0<br>(0-1)             | 1<br>(0-2)             | 2<br>(1-3)             | 3<br>(2-5)            |
| Occupational exposure to silica                           | 0<br>(0-0)             | 0<br>(0-0)             | 1<br>(0-1)             | 1<br>(1-2)             | 5<br>(3-7)             | 7<br>(4-11)            | 16<br>(10-23)         |
| Occupational exposure to sulfuric acid                    | 0<br>(0-0)             | 0<br>(0-0)             | 0<br>(0-0)             | 0<br>(0-1)             | 1<br>(0-2)             | 2<br>(1-6)             | 5<br>(1-12)           |
| Occupational asthmagens                                   | 128<br>(79-197)        | 134<br>(84-198)        | 121<br>(76-184)        | 103<br>(64-159)        | 111<br>(66-184)        | 103<br>(62-172)        | 121<br>(67-232)       |
| Occupational particulate matter, gases, and fumes         | 0<br>(0-0)             | 0<br>(0-0)             | 262<br>(124-425)       | 301<br>(143-486)       | 373<br>(177-589)       | 409<br>(196-633)       | 514<br>(256-786)      |
| Occupational noise                                        | 116<br>(62-200)        | 161<br>(87-278)        | 195<br>(110-331)       | 227<br>(128-378)       | 205<br>(119-333)       | 190<br>(110-310)       | 180<br>(106-284)      |
| Occupational risk factors for injuries                    | 2,731<br>(2,047-3,571) | 3,786<br>(2,840-4,833) | 3,452<br>(2,616-4,472) | 2,850<br>(2,189-3,643) | 2,347<br>(1,743-3,066) | 1,640<br>(1,233-2,179) | 1,217<br>(911-1,599)  |
| Occupational low back pain                                | 853<br>(561-1,225)     | 1,083<br>(719-1,516)   | 1,139<br>(762-1,589)   | 1,211<br>(804-1,683)   | 1,271<br>(839-1,772)   | 1,129<br>(742-1,574)   | 1,019<br>(677-1,412)  |
| Sexual abuse and violence                                 |                        |                        |                        |                        |                        |                        |                       |
| Childhood sexual abuse                                    |                        |                        |                        |                        |                        |                        |                       |
| Intimate partner violence                                 |                        |                        |                        |                        |                        |                        |                       |

| Web table 4: Global DALYs (in thousands) attributable to risk factors by age and sex in 1990 |                          |                           |                           |                           |                         |                        |                        |
|----------------------------------------------------------------------------------------------|--------------------------|---------------------------|---------------------------|---------------------------|-------------------------|------------------------|------------------------|
| Risk                                                                                         | Males,<br>50-54 Years    | Males,<br>55-59 Years     | Males,<br>60-64 Years     | Males,<br>65-69 Years     | Males,<br>70-74 Years   | Males,<br>75-79 Years  | Males,<br>80+ Years    |
| Unimproved water and sanitation                                                              | 229<br>(11-437)          | 210<br>(11-408)           | 218<br>(10-452)           | 173<br>(9-340)            | 131<br>(6-250)          | 86<br>(4-171)          | 79<br>(4-156)          |
| Unimproved water source                                                                      | 88<br>(6-175)            | 80<br>(5-165)             | 83<br>(5-174)             | 66<br>(4-134)             | 50<br>(3-100)           | 33<br>(2-67)           | 28<br>(2-59)           |
| Unimproved sanitation                                                                        | 163<br>(4-324)           | 149<br>(4-301)            | 155<br>(5-341)            | 123<br>(4-251)            | 93<br>(3-185)           | 61<br>(2-125)          | 57<br>(2-118)          |
| Air pollution                                                                                |                          |                           |                           |                           |                         |                        |                        |
| Ambient particulate matter pollution                                                         | 3,598<br>(2,711-4,544)   | 4,236<br>(3,172-5,334)    | 4,908<br>(3,692-6,034)    | 4,264<br>(3,066-5,424)    | 3,333<br>(2,385-4,227)  | 2,451<br>(1,760-3,073) | 1,744<br>(1,258-2,196) |
| Household air pollution from solid fuels                                                     | 4,298<br>(3,002-5,633)   | 5,086<br>(3,450-6,696)    | 5,939<br>(3,986-7,878)    | 5,327<br>(3,347-7,164)    | 4,414<br>(2,688-5,883)  | 2,943<br>(1,758-3,979) | 1,922<br>(1,142-2,616) |
| Ambient ozone pollution                                                                      | 105<br>(34-188)          | 152<br>(49-265)           | 226<br>(74-403)           | 245<br>(80-434)           | 230<br>(75-408)         | 176<br>(58-309)        | 133<br>(44-234)        |
| Other environmental risks                                                                    | 354<br>(292-431)         | 399<br>(333-488)          | 444<br>(369-543)          | 372<br>(310-453)          | 251<br>(209-305)        | 159<br>(133-191)       | 83<br>(69-99)          |
| Residential radon                                                                            |                          |                           |                           |                           |                         |                        |                        |
| Lead exposure                                                                                | 354<br>(292-431)         | 399<br>(333-488)          | 444<br>(369-543)          | 372<br>(310-453)          | 251<br>(209-305)        | 159<br>(133-191)       | 83<br>(69-99)          |
| Child and maternal undernutrition                                                            | 372<br>(260-515)         | 346<br>(241-485)          | 316<br>(223-436)          | 243<br>(174-334)          | 174<br>(124-237)        | 126<br>(91-172)        | 98<br>(75-132)         |
| Suboptimal breastfeeding                                                                     | 0<br>(0-0)               | 0<br>(0-0)                | 0<br>(0-0)                | 0<br>(0-0)                | 0<br>(0-0)              | 0<br>(0-0)             | 0<br>(0-0)             |
| Non-exclusive breastfeeding                                                                  | 0<br>(0-0)               | 0<br>(0-0)                | 0<br>(0-0)                | 0<br>(0-0)                | 0<br>(0-0)              | 0<br>(0-0)             | 0<br>(0-0)             |
| Discontinued breastfeeding                                                                   | 0<br>(0-0)               | 0<br>(0-0)                | 0<br>(0-0)                | 0<br>(0-0)                | 0<br>(0-0)              | 0<br>(0-0)             | 0<br>(0-0)             |
| Childhood underweight                                                                        | 0<br>(0-0)               | 0<br>(0-0)                | 0<br>(0-0)                | 0<br>(0-0)                | 0<br>(0-0)              | 0<br>(0-0)             | 0<br>(0-0)             |
| Iron deficiency                                                                              | 372<br>(260-515)         | 346<br>(241-485)          | 316<br>(223-436)          | 243<br>(174-334)          | 174<br>(124-237)        | 126<br>(91-172)        | 98<br>(75-132)         |
| Vitamin A deficiency                                                                         | 0<br>(0-0)               | 0<br>(0-0)                | 0<br>(0-0)                | 0<br>(0-0)                | 0<br>(0-0)              | 0<br>(0-0)             | 0<br>(0-0)             |
| Zinc deficiency                                                                              | 0<br>(0-0)               | 0<br>(0-0)                | 0<br>(0-0)                | 0<br>(0-0)                | 0<br>(0-0)              | 0<br>(0-0)             | 0<br>(0-0)             |
| Tobacco smoking, including second-hand smoke                                                 | 10,608<br>(8,942-12,307) | 12,720<br>(10,829-14,570) | 14,738<br>(12,564-16,777) | 12,442<br>(10,653-14,512) | 8,653<br>(7,302-10,379) | 6,020<br>(5,185-7,200) | 3,578<br>(3,133-4,138) |
| Tobacco smoking                                                                              | 10,335<br>(8,643-12,016) | 12,366<br>(10,480-14,254) | 14,283<br>(12,069-16,364) | 11,986<br>(10,112-14,055) | 8,254<br>(6,873-9,950)  | 5,673<br>(4,784-6,904) | 3,297<br>(2,847-3,893) |
| Second-hand smoke                                                                            | 273<br>(191-363)         | 353<br>(245-465)          | 455<br>(315-596)          | 455<br>(316-592)          | 399<br>(273-518)        | 348<br>(238-450)       | 281<br>(192-362)       |
| Alcohol and drug use                                                                         | 5,806<br>(5,175-6,492)   | 5,169<br>(4,614-5,818)    | 4,600<br>(4,059-5,175)    | 2,348<br>(2,012-2,710)    | 1,546<br>(1,271-1,827)  | 1,092<br>(885-1,311)   | 738<br>(567-915)       |
| Alcohol use                                                                                  | 5,564<br>(4,968-6,235)   | 5,016<br>(4,466-5,638)    | 4,501<br>(3,959-5,068)    | 2,324<br>(1,990-2,689)    | 1,535<br>(1,259-1,817)  | 1,086<br>(878-1,306)   | 735<br>(564-913)       |

**Web table 4: Global DALYs (in thousands) attributable to risk factors by age and sex in 1990**

| Risk                                          | Males,<br>50-54 Years     | Males,<br>55-59 Years     | Males,<br>60-64 Years     | Males,<br>65-69 Years     | Males,<br>70-74 Years    | Males,<br>75-79 Years  | Males,<br>80+ Years    |
|-----------------------------------------------|---------------------------|---------------------------|---------------------------|---------------------------|--------------------------|------------------------|------------------------|
| Drug use                                      | 272<br>(211-361)          | 185<br>(150-231)          | 130<br>(105-163)          | 24<br>(17-37)             | 11<br>(7-18)             | 6<br>(4-13)            | 3<br>(2-7)             |
| Physiological risk factors                    |                           |                           |                           |                           |                          |                        |                        |
| High fasting plasma glucose                   | 3,407<br>(2,814-4,012)    | 4,295<br>(3,587-5,017)    | 4,603<br>(3,790-5,414)    | 3,931<br>(3,284-4,576)    | 2,920<br>(2,426-3,414)   | 2,172<br>(1,805-2,540) | 1,479<br>(1,224-1,733) |
| High total cholesterol                        | 2,789<br>(2,274-3,340)    | 3,069<br>(2,499-3,685)    | 3,661<br>(3,007-4,377)    | 3,000<br>(2,448-3,645)    | 2,127<br>(1,675-2,585)   | 1,624<br>(1,231-2,035) | 1,066<br>(862-1,301)   |
| High blood pressure                           | 7,027<br>(6,145-7,972)    | 9,556<br>(8,599-10,678)   | 11,067<br>(9,952-12,385)  | 10,891<br>(9,939-12,072)  | 8,528<br>(7,738-9,471)   | 7,228<br>(6,574-7,892) | 5,535<br>(5,026-6,078) |
| High body-mass index                          | 3,081<br>(2,379-3,793)    | 3,321<br>(2,605-4,033)    | 3,822<br>(3,019-4,648)    | 3,110<br>(2,456-3,787)    | 2,270<br>(1,780-2,768)   | 1,769<br>(1,393-2,153) | 1,233<br>(949-1,525)   |
| Low bone mineral density                      | 232<br>(168-307)          | 247<br>(183-328)          | 296<br>(230-391)          | 273<br>(214-358)          | 241<br>(191-318)         | 225<br>(177-282)       | 249<br>(201-313)       |
| Dietary risk factors and physical inactivity  | 11,092<br>(10,110-12,124) | 13,114<br>(11,897-14,419) | 15,256<br>(13,897-16,766) | 13,699<br>(12,519-15,001) | 10,660<br>(9,500-11,719) | 8,432<br>(7,657-9,153) | 6,278<br>(5,650-6,901) |
| Diet low in fruits                            | 5,767<br>(4,500-7,018)    | 6,735<br>(5,213-8,138)    | 7,319<br>(5,627-8,883)    | 6,305<br>(4,938-7,664)    | 4,754<br>(3,543-5,893)   | 3,436<br>(2,563-4,230) | 2,205<br>(1,654-2,777) |
| Diet low in vegetables                        | 2,221<br>(1,469-2,990)    | 2,450<br>(1,607-3,354)    | 2,732<br>(1,858-3,640)    | 2,315<br>(1,576-3,086)    | 1,738<br>(1,167-2,379)   | 1,351<br>(906-1,812)   | 930<br>(620-1,255)     |
| Diet low in whole grains                      | 2,061<br>(1,610-2,492)    | 2,240<br>(1,753-2,706)    | 2,446<br>(1,932-2,960)    | 2,017<br>(1,580-2,456)    | 1,499<br>(1,167-1,828)   | 1,123<br>(877-1,360)   | 748<br>(580-908)       |
| Diet low in nuts and seeds                    | 2,931<br>(1,941-3,764)    | 3,197<br>(2,096-4,090)    | 3,656<br>(2,358-4,680)    | 3,154<br>(2,018-4,085)    | 2,314<br>(1,439-3,058)   | 1,855<br>(1,154-2,445) | 1,391<br>(844-1,866)   |
| Diet low in milk                              | 86<br>(26-145)            | 108<br>(33-181)           | 123<br>(37-208)           | 112<br>(34-189)           | 83<br>(25-141)           | 64<br>(19-108)         | 40<br>(12-67)          |
| Diet high in red meat                         | 75<br>(34-120)            | 81<br>(38-125)            | 85<br>(39-132)            | 71<br>(33-111)            | 50<br>(23-78)            | 39<br>(17-60)          | 25<br>(11-38)          |
| Diet high in processed meat                   | 1,276<br>(335-2,148)      | 1,340<br>(355-2,256)      | 1,491<br>(391-2,576)      | 1,249<br>(318-2,149)      | 873<br>(221-1,498)       | 726<br>(180-1,242)     | 537<br>(129-923)       |
| Diet high in sugar-sweetened beverages        | 269<br>(91-419)           | 277<br>(161-438)          | 293<br>(169-465)          | 248<br>(137-391)          | 193<br>(96-324)          | 136<br>(63-206)        | 104<br>(44-138)        |
| Diet low in fibre                             | 1,038<br>(453-1,642)      | 1,081<br>(479-1,713)      | 1,155<br>(507-1,829)      | 952<br>(424-1,495)        | 710<br>(318-1,114)       | 551<br>(245-864)       | 395<br>(175-626)       |
| Diet low in calcium                           | 104<br>(74-132)           | 132<br>(94-167)           | 155<br>(110-203)          | 149<br>(99-198)           | 119<br>(79-163)          | 100<br>(62-140)        | 75<br>(42-111)         |
| Diet low in seafood omega-3 fatty acids       | 1,679<br>(1,199-2,165)    | 1,770<br>(1,281-2,274)    | 1,981<br>(1,435-2,542)    | 1,655<br>(1,196-2,128)    | 1,176<br>(853-1,517)     | 911<br>(654-1,171)     | 644<br>(457-834)       |
| Diet low in polyunsaturated fatty acids       | 748<br>(354-1,141)        | 798<br>(375-1,225)        | 887<br>(409-1,362)        | 744<br>(351-1,137)        | 534<br>(251-823)         | 419<br>(197-647)       | 300<br>(140-465)       |
| Diet high in trans fatty acids                | 587<br>(413-761)          | 641<br>(462-836)          | 707<br>(506-925)          | 628<br>(443-819)          | 459<br>(327-597)         | 339<br>(242-441)       | 239<br>(170-310)       |
| Diet high in sodium                           | 2,894<br>(1,922-3,812)    | 3,596<br>(2,397-4,788)    | 4,343<br>(2,814-5,751)    | 4,023<br>(2,608-5,379)    | 3,083<br>(1,996-4,111)   | 2,307<br>(1,469-3,092) | 1,586<br>(987-2,163)   |
| Physical inactivity and low physical activity |                           |                           |                           |                           |                          |                        |                        |

**Web table 4: Global DALYs (in thousands) attributable to risk factors by age and sex in 1990**

| Risk                                                      | Males,<br>50-54 Years  | Males,<br>55-59 Years  | Males,<br>60-64 Years  | Males,<br>65-69 Years  | Males,<br>70-74 Years | Males,<br>75-79 Years | Males,<br>80+ Years |
|-----------------------------------------------------------|------------------------|------------------------|------------------------|------------------------|-----------------------|-----------------------|---------------------|
| Occupational risk factors                                 | 3,272<br>(2,608–4,006) | 3,064<br>(2,327–3,777) | 2,689<br>(1,944–3,430) | 1,575<br>(1,091–2,085) | 1,292<br>(852–1,753)  | 811<br>(516–1,137)    | 37<br>(27–53)       |
| Occupational carcinogens                                  | 164<br>(103–244)       | 244<br>(155–353)       | 280<br>(184–411)       | 189<br>(129–268)       | 129<br>(87–195)       | 66<br>(47–97)         | 37<br>(27–53)       |
| Occupational exposure to asbestos                         | 33<br>(21–50)          | 47<br>(30–73)          | 60<br>(39–95)          | 63<br>(41–97)          | 44<br>(29–70)         | 34<br>(23–54)         | 20<br>(13–32)       |
| Occupational exposure to arsenic                          | 4<br>(2–8)             | 6<br>(2–12)            | 7<br>(3–13)            | 4<br>(1–7)             | 3<br>(1–5)            | 1<br>(0–2)            | 0<br>(0–1)          |
| Occupational exposure to benzene                          | 1<br>(1–2)             | 2<br>(1–3)             | 2<br>(1–3)             | 2<br>(1–4)             | 2<br>(1–3)            | 1<br>(1–3)            | 1<br>(0–1)          |
| Occupational exposure to beryllium                        | 0<br>(0–0)             | 0<br>(0–1)             | 0<br>(0–1)             | 0<br>(0–0)             | 0<br>(0–0)            | 0<br>(0–0)            | 0<br>(0–0)          |
| Occupational exposure to cadmium                          | 1<br>(0–1)             | 1<br>(1–2)             | 1<br>(1–2)             | 1<br>(0–1)             | 0<br>(0–1)            | 0<br>(0–0)            | 0<br>(0–0)          |
| Occupational exposure to chromium                         | 3<br>(1–4)             | 4<br>(2–6)             | 4<br>(3–7)             | 2<br>(1–4)             | 2<br>(1–3)            | 1<br>(0–1)            | 0<br>(0–1)          |
| Occupational exposure to diesel engine exhaust            | 38<br>(21–60)          | 58<br>(32–91)          | 65<br>(37–102)         | 36<br>(20–58)          | 25<br>(14–40)         | 9<br>(5–15)           | 5<br>(3–8)          |
| Occupational exposure to second-hand smoke                | 35<br>(22–51)          | 54<br>(35–77)          | 60<br>(40–87)          | 34<br>(22–50)          | 23<br>(15–35)         | 8<br>(6–13)           | 4<br>(3–7)          |
| Occupational exposure to formaldehyde                     | 1<br>(0–1)             | 1<br>(0–2)             | 1<br>(0–1)             | 1<br>(0–1)             | 0<br>(0–1)            | 0<br>(0–1)            | 0<br>(0–0)          |
| Occupational exposure to nickel                           | 12<br>(3–26)           | 19<br>(5–40)           | 21<br>(6–45)           | 12<br>(3–25)           | 8<br>(2–17)           | 3<br>(1–6)            | 2<br>(0–3)          |
| Occupational exposure to polycyclic aromatic hydrocarbons | 6<br>(3–9)             | 9<br>(4–15)            | 10<br>(5–17)           | 5<br>(3–9)             | 4<br>(2–6)            | 1<br>(1–2)            | 1<br>(0–1)          |
| Occupational exposure to silica                           | 27<br>(17–40)          | 42<br>(26–61)          | 47<br>(30–67)          | 26<br>(17–40)          | 18<br>(12–28)         | 6<br>(4–10)           | 3<br>(2–5)          |
| Occupational exposure to sulfuric acid                    | 9<br>(2–19)            | 10<br>(3–23)           | 11<br>(3–24)           | 6<br>(2–15)            | 4<br>(1–9)            | 2<br>(0–3)            | 1<br>(0–2)          |
| Occupational asthmagens                                   | 143<br>(77–270)        | 151<br>(80–283)        | 142<br>(73–276)        | 89<br>(44–173)         | 73<br>(36–134)        | 48<br>(24–91)         | 0<br>(0–0)          |
| Occupational particulate matter, gases, and fumes         | 804<br>(383–1,201)     | 1,003<br>(462–1,517)   | 1,140<br>(525–1,753)   | 771<br>(342–1,239)     | 719<br>(314–1,151)    | 512<br>(227–810)      | 0<br>(0–0)          |
| Occupational noise                                        | 212<br>(125–335)       | 151<br>(86–244)        | 154<br>(88–247)        | 67<br>(38–110)         | 64<br>(36–104)        | 15<br>(6–27)          | 0<br>(0–0)          |
| Occupational risk factors for injuries                    | 954<br>(717–1,245)     | 651<br>(487–852)       | 342<br>(255–445)       | 124<br>(91–167)        | 66<br>(49–88)         | 15<br>(11–20)         | 0<br>(0–0)          |
| Occupational low back pain                                | 995<br>(665–1,382)     | 865<br>(584–1,194)     | 633<br>(422–885)       | 335<br>(221–478)       | 241<br>(159–345)      | 154<br>(101–220)      | 0<br>(0–0)          |
| Sexual abuse and violence                                 |                        |                        |                        |                        |                       |                       |                     |
| Childhood sexual abuse                                    |                        |                        |                        |                        |                       |                       |                     |
| Intimate partner violence                                 |                        |                        |                        |                        |                       |                       |                     |

**Web table 4: Global DALYs (in thousands) attributable to risk factors by age and sex in 1990**

| Risk                                         | Females,<br>All Ages         | Females,<br>0-6 Days   | Females,<br>7-27 Days   | Females,<br>28-364 Days   | Females,<br>1-4 Years     | Females,<br>5-9 Years  | Females,<br>10-14 Years |
|----------------------------------------------|------------------------------|------------------------|-------------------------|---------------------------|---------------------------|------------------------|-------------------------|
| Unimproved water and sanitation              | 25,123<br>(1,262-45,792)     | 696<br>(29-1,380)      | 1,658<br>(81-3,115)     | 8,956<br>(444-16,476)     | 8,465<br>(444-15,452)     | 1,144<br>(50-2,150)    | 509<br>(21-973)         |
| Unimproved water source                      | 10,097<br>(722-19,424)       | 270<br>(17-582)        | 654<br>(44-1,287)       | 3,603<br>(255-7,059)      | 3,470<br>(256-6,779)      | 440<br>(30-894)        | 202<br>(13-429)         |
| Unimproved sanitation                        | 17,441<br>(522-32,889)       | 492<br>(13-1,015)      | 1,161<br>(36-2,280)     | 6,199<br>(184-11,928)     | 5,835<br>(180-11,136)     | 809<br>(22-1,569)      | 355<br>(8-705)          |
| Air pollution                                |                              |                        |                         |                           |                           |                        |                         |
| Ambient particulate matter pollution         | 35,032<br>(29,974-40,402)    | 1,200<br>(769-1,688)   | 1,306<br>(872-1,748)    | 5,595<br>(3,784-7,451)    | 3,863<br>(2,616-5,125)    | 0<br>(0-0)             | 0<br>(0-0)              |
| Household air pollution from solid fuels     | 79,261<br>(64,684-93,004)    | 4,152<br>(2,848-5,503) | 4,568<br>(3,214-5,783)  | 19,242<br>(13,955-24,153) | 13,795<br>(10,096-17,469) | 0<br>(0-0)             | 0<br>(0-0)              |
| Ambient ozone pollution                      | 1,125<br>(375-1,990)         | 0<br>(0-0)             | 0<br>(0-0)              | 0<br>(0-0)                | 0<br>(0-0)                | 0<br>(0-0)             | 0<br>(0-0)              |
| Other environmental risks                    | 2,489<br>(1,974-3,015)       | 0<br>(0-0)             | 0<br>(0-0)              | 0<br>(0-0)                | 4<br>(1-7)                | 11<br>(6-19)           | 7<br>(4-12)             |
| Residential radon                            |                              |                        |                         |                           |                           |                        |                         |
| Lead exposure                                | 2,489<br>(1,974-3,015)       | 0<br>(0-0)             | 0<br>(0-0)              | 0<br>(0-0)                | 4<br>(1-7)                | 11<br>(6-19)           | 7<br>(4-12)             |
| Child and maternal undernutrition            | 164,599<br>(139,926-192,077) | 0<br>(0-0)             | 9,288<br>(5,953-12,426) | 67,898<br>(55,921-80,266) | 64,458<br>(52,644-79,349) | 3,536<br>(2,394-5,048) | 2,410<br>(1,633-3,439)  |
| Suboptimal breastfeeding                     | 50,359<br>(32,186-70,526)    | 0<br>(0-0)             | 9,285<br>(5,950-12,423) | 37,097<br>(22,897-52,842) | 3,977<br>(420-8,546)      | 0<br>(0-0)             | 0<br>(0-0)              |
| Non-exclusive breastfeeding                  | 43,601<br>(26,173-62,072)    | 0<br>(0-0)             | 9,285<br>(5,950-12,423) | 34,315<br>(20,089-49,656) | 0<br>(0-0)                | 0<br>(0-0)             | 0<br>(0-0)              |
| Discontinued breastfeeding                   | 6,758<br>(696-14,710)        | 0<br>(0-0)             | 0<br>(0-0)              | 2,782<br>(263-6,354)      | 3,977<br>(420-8,546)      | 0<br>(0-0)             | 0<br>(0-0)              |
| Childhood underweight                        | 93,028<br>(78,656-112,766)   | 0<br>(0-0)             | 0<br>(0-0)              | 45,284<br>(37,921-53,845) | 47,744<br>(39,053-58,791) | 0<br>(0-0)             | 0<br>(0-0)              |
| Iron deficiency                              | 30,390<br>(22,473-40,703)    | 0<br>(0-0)             | 3<br>(2-4)              | 1,798<br>(1,309-2,477)    | 5,634<br>(3,930-7,995)    | 3,536<br>(2,394-5,048) | 2,410<br>(1,633-3,439)  |
| Vitamin A deficiency                         | 14,598<br>(7,068-25,637)     | 0<br>(0-0)             | 0<br>(0-0)              | 3,690<br>(1,660-6,332)    | 10,908<br>(5,260-19,557)  | 0<br>(0-0)             | 0<br>(0-0)              |
| Zinc deficiency                              | 11,709<br>(2,640-22,049)     | 0<br>(0-0)             | 0<br>(0-0)              | 0<br>(0-0)                | 11,709<br>(2,640-22,049)  | 0<br>(0-0)             | 0<br>(0-0)              |
| Tobacco smoking, including second-hand smoke | 46,926<br>(39,634-58,092)    | 1,323<br>(898-1,833)   | 1,475<br>(1,018-1,963)  | 6,529<br>(4,481-8,555)    | 4,327<br>(2,933-5,668)    | 0<br>(0-0)             | 0<br>(0-0)              |
| Tobacco smoking                              | 28,784<br>(21,829-40,090)    | 0<br>(0-0)             | 0<br>(0-0)              | 0<br>(0-0)                | 0<br>(0-0)                | 0<br>(0-0)             | 0<br>(0-0)              |
| Second-hand smoke                            | 18,142<br>(13,748-22,355)    | 1,323<br>(898-1,833)   | 1,475<br>(1,018-1,963)  | 6,529<br>(4,481-8,555)    | 4,327<br>(2,933-5,668)    | 0<br>(0-0)             | 0<br>(0-0)              |
| Alcohol and drug use                         | 22,851<br>(19,812-26,197)    | 14<br>(8-23)           | 12<br>(5-20)            | 64<br>(37-104)            | 227<br>(117-363)          | 104<br>(76-132)        | 160<br>(125-204)        |
| Alcohol use                                  | 17,945<br>(15,470-20,768)    | 9<br>(5-15)            | 4<br>(2-10)             | 34<br>(21-49)             | 148<br>(83-223)           | 89<br>(67-110)         | 116<br>(93-143)         |



**Web table 4: Global DALYs (in thousands) attributable to risk factors by age and sex in 1990**

| Risk                                          | Females,<br>All Ages      | Females,<br>0-6 Days | Females,<br>7-27 Days | Females,<br>28-364 Days | Females,<br>1-4 Years | Females,<br>5-9 Years | Females,<br>10-14 Years |
|-----------------------------------------------|---------------------------|----------------------|-----------------------|-------------------------|-----------------------|-----------------------|-------------------------|
| Drug use                                      | 4,993<br>(3,811–6,417)    | 6<br>(2–11)          | 7<br>(2–13)           | 30<br>(12–66)           | 79<br>(19–175)        | 15<br>(5–34)          | 44<br>(27–70)           |
| Physiological risk factors                    |                           |                      |                       |                         |                       |                       |                         |
| High fasting plasma glucose                   | 26,181<br>(22,243–30,349) | 0<br>(0–0)           | 0<br>(0–0)            | 0<br>(0–0)              | 0<br>(0–0)            | 0<br>(0–0)            | 0<br>(0–0)              |
| High total cholesterol                        | 17,006<br>(13,940–20,640) | 0<br>(0–0)           | 0<br>(0–0)            | 0<br>(0–0)              | 0<br>(0–0)            | 0<br>(0–0)            | 0<br>(0–0)              |
| High blood pressure                           | 63,897<br>(57,903–70,789) | 0<br>(0–0)           | 0<br>(0–0)            | 0<br>(0–0)              | 0<br>(0–0)            | 0<br>(0–0)            | 0<br>(0–0)              |
| High body-mass index                          | 26,174<br>(20,911–31,642) | 0<br>(0–0)           | 0<br>(0–0)            | 0<br>(0–0)              | 0<br>(0–0)            | 0<br>(0–0)            | 0<br>(0–0)              |
| Low bone mineral density                      | 1,361<br>(1,102–1,686)    | 0<br>(0–0)           | 0<br>(0–0)            | 0<br>(0–0)              | 0<br>(0–0)            | 0<br>(0–0)            | 0<br>(0–0)              |
| Dietary risk factors and physical inactivity  |                           |                      |                       |                         |                       |                       |                         |
| Diet low in fruits                            | 72,609<br>(66,495–79,085) | 0<br>(0–0)           | 0<br>(0–0)            | 0<br>(0–0)              | 0<br>(0–0)            | 0<br>(0–0)            | 0<br>(0–0)              |
| Diet low in vegetables                        | 32,474<br>(25,061–39,155) | 0<br>(0–0)           | 0<br>(0–0)            | 0<br>(0–0)              | 0<br>(0–0)            | 0<br>(0–0)            | 0<br>(0–0)              |
| Diet low in whole grains                      | 12,803<br>(8,412–17,503)  | 0<br>(0–0)           | 0<br>(0–0)            | 0<br>(0–0)              | 0<br>(0–0)            | 0<br>(0–0)            | 0<br>(0–0)              |
| Diet low in nuts and seeds                    | 12,370<br>(9,625–14,895)  | 0<br>(0–0)           | 0<br>(0–0)            | 0<br>(0–0)              | 0<br>(0–0)            | 0<br>(0–0)            | 0<br>(0–0)              |
| Diet low in milk                              | 15,607<br>(9,915–20,208)  | 0<br>(0–0)           | 0<br>(0–0)            | 0<br>(0–0)              | 0<br>(0–0)            | 0<br>(0–0)            | 0<br>(0–0)              |
| Diet high in red meat                         | 710<br>(210–1,210)        | 0<br>(0–0)           | 0<br>(0–0)            | 0<br>(0–0)              | 0<br>(0–0)            | 0<br>(0–0)            | 0<br>(0–0)              |
| Diet high in processed meat                   | 566<br>(263–903)          | 0<br>(0–0)           | 0<br>(0–0)            | 0<br>(0–0)              | 0<br>(0–0)            | 0<br>(0–0)            | 0<br>(0–0)              |
| Diet high in sugar-sweetened beverages        | 6,882<br>(2,340–11,119)   | 0<br>(0–0)           | 0<br>(0–0)            | 0<br>(0–0)              | 0<br>(0–0)            | 0<br>(0–0)            | 0<br>(0–0)              |
| Diet low in fibre                             | 1,506<br>(861–2,498)      | 0<br>(0–0)           | 0<br>(0–0)            | 0<br>(0–0)              | 0<br>(0–0)            | 0<br>(0–0)            | 0<br>(0–0)              |
| Diet low in calcium                           | 4,862<br>(2,188–7,562)    | 0<br>(0–0)           | 0<br>(0–0)            | 0<br>(0–0)              | 0<br>(0–0)            | 0<br>(0–0)            | 0<br>(0–0)              |
| Diet low in seafood omega-3 fatty acids       | 753<br>(521–975)          | 0<br>(0–0)           | 0<br>(0–0)            | 0<br>(0–0)              | 0<br>(0–0)            | 0<br>(0–0)            | 0<br>(0–0)              |
| Diet low in polyunsaturated fatty acids       | 8,120<br>(5,900–10,388)   | 0<br>(0–0)           | 0<br>(0–0)            | 0<br>(0–0)              | 0<br>(0–0)            | 0<br>(0–0)            | 0<br>(0–0)              |
| Diet high in trans fatty acids                | 3,727<br>(1,788–5,709)    | 0<br>(0–0)           | 0<br>(0–0)            | 0<br>(0–0)              | 0<br>(0–0)            | 0<br>(0–0)            | 0<br>(0–0)              |
| Diet high in sodium                           | 3,085<br>(2,226–3,944)    | 0<br>(0–0)           | 0<br>(0–0)            | 0<br>(0–0)              | 0<br>(0–0)            | 0<br>(0–0)            | 0<br>(0–0)              |
| Physical inactivity and low physical activity | 19,376<br>(12,521–25,596) | 0<br>(0–0)           | 0<br>(0–0)            | 0<br>(0–0)              | 0<br>(0–0)            | 0<br>(0–0)            | 0<br>(0–0)              |

**Web table 4: Global DALYs (in thousands) attributable to risk factors by age and sex in 1990**

| Risk                                                      | Females,<br>All Ages     | Females,<br>0-6 Days | Females,<br>7-27 Days | Females,<br>28-364 Days | Females,<br>1-4 Years | Females,<br>5-9 Years | Females,<br>10-14 Years |
|-----------------------------------------------------------|--------------------------|----------------------|-----------------------|-------------------------|-----------------------|-----------------------|-------------------------|
| Occupational risk factors                                 | 12,754<br>(9,357–16,658) | 0<br>(0–0)           | 0<br>(0–0)            | 0<br>(0–0)              | 0<br>(0–0)            | 0<br>(0–0)            | 0<br>(0–0)              |
| Occupational carcinogens                                  | 412<br>(284–611)         | 0<br>(0–0)           | 0<br>(0–0)            | 0<br>(0–0)              | 0<br>(0–0)            | 0<br>(0–0)            | 0<br>(0–0)              |
| Occupational exposure to asbestos                         | 122<br>(78–189)          | 0<br>(0–0)           | 0<br>(0–0)            | 0<br>(0–0)              | 0<br>(0–0)            | 0<br>(0–0)            | 0<br>(0–0)              |
| Occupational exposure to arsenic                          | 12<br>(5–24)             | 0<br>(0–0)           | 0<br>(0–0)            | 0<br>(0–0)              | 0<br>(0–0)            | 0<br>(0–0)            | 0<br>(0–0)              |
| Occupational exposure to benzene                          | 28<br>(11–52)            | 0<br>(0–0)           | 0<br>(0–0)            | 0<br>(0–0)              | 0<br>(0–0)            | 0<br>(0–0)            | 0<br>(0–0)              |
| Occupational exposure to beryllium                        | 1<br>(0–1)               | 0<br>(0–0)           | 0<br>(0–0)            | 0<br>(0–0)              | 0<br>(0–0)            | 0<br>(0–0)            | 0<br>(0–0)              |
| Occupational exposure to cadmium                          | 2<br>(1–3)               | 0<br>(0–0)           | 0<br>(0–0)            | 0<br>(0–0)              | 0<br>(0–0)            | 0<br>(0–0)            | 0<br>(0–0)              |
| Occupational exposure to chromium                         | 8<br>(4–13)              | 0<br>(0–0)           | 0<br>(0–0)            | 0<br>(0–0)              | 0<br>(0–0)            | 0<br>(0–0)            | 0<br>(0–0)              |
| Occupational exposure to diesel engine exhaust            | 54<br>(31–88)            | 0<br>(0–0)           | 0<br>(0–0)            | 0<br>(0–0)              | 0<br>(0–0)            | 0<br>(0–0)            | 0<br>(0–0)              |
| Occupational exposure to second-hand smoke                | 100<br>(69–162)          | 0<br>(0–0)           | 0<br>(0–0)            | 0<br>(0–0)              | 0<br>(0–0)            | 0<br>(0–0)            | 0<br>(0–0)              |
| Occupational exposure to formaldehyde                     | 7<br>(3–13)              | 0<br>(0–0)           | 0<br>(0–0)            | 0<br>(0–0)              | 0<br>(0–0)            | 0<br>(0–0)            | 0<br>(0–0)              |
| Occupational exposure to nickel                           | 37<br>(10–79)            | 0<br>(0–0)           | 0<br>(0–0)            | 0<br>(0–0)              | 0<br>(0–0)            | 0<br>(0–0)            | 0<br>(0–0)              |
| Occupational exposure to polycyclic aromatic hydrocarbons | 13<br>(6–23)             | 0<br>(0–0)           | 0<br>(0–0)            | 0<br>(0–0)              | 0<br>(0–0)            | 0<br>(0–0)            | 0<br>(0–0)              |
| Occupational exposure to silica                           | 31<br>(21–52)            | 0<br>(0–0)           | 0<br>(0–0)            | 0<br>(0–0)              | 0<br>(0–0)            | 0<br>(0–0)            | 0<br>(0–0)              |
| Occupational exposure to sulfuric acid                    | 5<br>(1–12)              | 0<br>(0–0)           | 0<br>(0–0)            | 0<br>(0–0)              | 0<br>(0–0)            | 0<br>(0–0)            | 0<br>(0–0)              |
| Occupational asthmagens                                   | 662<br>(366–1,062)       | 0<br>(0–0)           | 0<br>(0–0)            | 0<br>(0–0)              | 0<br>(0–0)            | 0<br>(0–0)            | 0<br>(0–0)              |
| Occupational particulate matter, gases, and fumes         | 2,745<br>(1,216–4,406)   | 0<br>(0–0)           | 0<br>(0–0)            | 0<br>(0–0)              | 0<br>(0–0)            | 0<br>(0–0)            | 0<br>(0–0)              |
| Occupational noise                                        | 933<br>(550–1,489)       | 0<br>(0–0)           | 0<br>(0–0)            | 0<br>(0–0)              | 0<br>(0–0)            | 0<br>(0–0)            | 0<br>(0–0)              |
| Occupational risk factors for injuries                    | 1,090<br>(836–1,437)     | 0<br>(0–0)           | 0<br>(0–0)            | 0<br>(0–0)              | 0<br>(0–0)            | 0<br>(0–0)            | 0<br>(0–0)              |
| Occupational low back pain                                | 6,912<br>(4,487–9,835)   | 0<br>(0–0)           | 0<br>(0–0)            | 0<br>(0–0)              | 0<br>(0–0)            | 0<br>(0–0)            | 0<br>(0–0)              |
| Sexual abuse and violence                                 |                          |                      |                       |                         |                       |                       |                         |
| Childhood sexual abuse                                    |                          |                      |                       |                         |                       |                       |                         |
| Intimate partner violence                                 |                          |                      |                       |                         |                       |                       |                         |

**Web table 4: Global DALYs (in thousands) attributable to risk factors by age and sex in 1990**

| Risk                                         | Females,<br>15-19 Years | Females,<br>20-24 Years | Females,<br>25-29 Years | Females,<br>30-34 Years | Females,<br>35-39 Years | Females,<br>40-44 Years | Females,<br>45-49 Years |
|----------------------------------------------|-------------------------|-------------------------|-------------------------|-------------------------|-------------------------|-------------------------|-------------------------|
| Unimproved water and sanitation              | 439<br>(21-875)         | 454<br>(18-864)         | 391<br>(17-754)         | 330<br>(15-626)         | 307<br>(14-578)         | 225<br>(10-426)         | 212<br>(10-402)         |
| Unimproved water source                      | 171<br>(12-361)         | 176<br>(11-361)         | 157<br>(10-321)         | 134<br>(9-269)          | 124<br>(9-253)          | 91<br>(6-187)           | 84<br>(6-176)           |
| Unimproved sanitation                        | 309<br>(10-632)         | 320<br>(8-627)          | 272<br>(8-536)          | 228<br>(6-451)          | 212<br>(6-420)          | 156<br>(4-308)          | 149<br>(5-291)          |
| Air pollution                                |                         |                         |                         |                         |                         |                         |                         |
| Ambient particulate matter pollution         | 0<br>(0-0)              | 0<br>(0-0)              | 493<br>(358-656)        | 628<br>(453-825)        | 855<br>(634-1,122)      | 1,092<br>(791-1,437)    | 1,319<br>(934-1,709)    |
| Household air pollution from solid fuels     | 0<br>(0-0)              | 0<br>(0-0)              | 925<br>(705-1,179)      | 1,139<br>(881-1,443)    | 1,543<br>(1,198-1,925)  | 1,865<br>(1,463-2,323)  | 2,270<br>(1,780-2,829)  |
| Ambient ozone pollution                      | 0<br>(0-0)              | 0<br>(0-0)              | 13<br>(4-24)            | 14<br>(4-25)            | 25<br>(8-46)            | 29<br>(9-51)            | 42<br>(14-75)           |
| Other environmental risks                    | 0<br>(0-0)              | 0<br>(0-0)              | 171<br>(73-282)         | 207<br>(95-336)         | 121<br>(87-169)         | 153<br>(112-213)        | 161<br>(129-199)        |
| Residential radon                            |                         |                         |                         |                         |                         |                         |                         |
| Lead exposure                                | 0<br>(0-0)              | 0<br>(0-0)              | 171<br>(73-282)         | 207<br>(95-336)         | 121<br>(87-169)         | 153<br>(112-213)        | 161<br>(129-199)        |
| Child and maternal undernutrition            | 2,613<br>(1,910-3,537)  | 3,061<br>(2,289-4,016)  | 2,613<br>(1,913-3,417)  | 2,173<br>(1,601-2,846)  | 1,917<br>(1,405-2,537)  | 1,284<br>(950-1,689)    | 866<br>(635-1,158)      |
| Suboptimal breastfeeding                     | 0<br>(0-0)              |
| Non-exclusive breastfeeding                  | 0<br>(0-0)              |
| Discontinued breastfeeding                   | 0<br>(0-0)              |
| Childhood underweight                        | 0<br>(0-0)              |
| Iron deficiency                              | 2,613<br>(1,910-3,537)  | 3,061<br>(2,289-4,016)  | 2,613<br>(1,913-3,417)  | 2,173<br>(1,601-2,846)  | 1,917<br>(1,405-2,537)  | 1,284<br>(950-1,689)    | 866<br>(635-1,158)      |
| Vitamin A deficiency                         | 0<br>(0-0)              |
| Zinc deficiency                              | 0<br>(0-0)              |
| Tobacco smoking, including second-hand smoke | 0<br>(0-0)              | 0<br>(0-0)              | 106<br>(71-147)         | 770<br>(553-1,692)      | 1,344<br>(861-2,158)    | 2,080<br>(1,408-2,899)  | 2,072<br>(1,512-2,882)  |
| Tobacco smoking                              | 0<br>(0-0)              | 0<br>(0-0)              | 0<br>(0-0)              | 633<br>(423-1,543)      | 1,183<br>(676-2,014)    | 1,903<br>(1,186-2,740)  | 1,821<br>(1,265-2,701)  |
| Second-hand smoke                            | 0<br>(0-0)              | 0<br>(0-0)              | 106<br>(71-147)         | 137<br>(93-184)         | 161<br>(96-237)         | 177<br>(103-265)        | 251<br>(153-360)        |
| Alcohol and drug use                         | 1,307<br>(1,068-1,593)  | 2,041<br>(1,637-2,502)  | 2,014<br>(1,621-2,455)  | 1,666<br>(1,384-1,996)  | 1,776<br>(1,498-2,137)  | 1,594<br>(1,368-1,900)  | 1,470<br>(1,259-1,718)  |
| Alcohol use                                  | 800<br>(666-968)        | 909<br>(755-1,089)      | 896<br>(756-1,059)      | 919<br>(787-1,063)      | 1,294<br>(1,091-1,634)  | 1,304<br>(1,113-1,604)  | 1,294<br>(1,096-1,532)  |
| Drug use                                     | 508<br>(372-684)        | 1,135<br>(842-1,466)    | 1,122<br>(828-1,459)    | 752<br>(560-977)        | 489<br>(369-631)        | 298<br>(226-382)        | 186<br>(143-238)        |

**Web table 4: Global DALYs (in thousands) attributable to risk factors by age and sex in 1990**

| Risk                                          | Females,<br>15-19 Years | Females,<br>20-24 Years | Females,<br>25-29 Years | Females,<br>30-34 Years | Females,<br>35-39 Years | Females,<br>40-44 Years | Females,<br>45-49 Years |
|-----------------------------------------------|-------------------------|-------------------------|-------------------------|-------------------------|-------------------------|-------------------------|-------------------------|
| Physiological risk factors                    |                         |                         |                         |                         |                         |                         |                         |
| High fasting plasma glucose                   | 0<br>(0-0)              | 0<br>(0-0)              | 495<br>(402-605)        | 629<br>(515-770)        | 1,018<br>(837-1,244)    | 1,174<br>(955-1,435)    | 1,681<br>(1,395-2,003)  |
| High total cholesterol                        | 0<br>(0-0)              | 0<br>(0-0)              | 137<br>(90-193)         | 184<br>(123-259)        | 343<br>(258-456)        | 449<br>(336-582)        | 740<br>(582-919)        |
| High blood pressure                           | 0<br>(0-0)              | 0<br>(0-0)              | 505<br>(343-688)        | 608<br>(419-816)        | 1,389<br>(1,111-1,712)  | 1,689<br>(1,343-2,069)  | 3,005<br>(2,592-3,518)  |
| High body-mass index                          | 0<br>(0-0)              | 0<br>(0-0)              | 446<br>(310-601)        | 560<br>(393-743)        | 1,100<br>(817-1,410)    | 1,272<br>(946-1,621)    | 1,771<br>(1,363-2,233)  |
| Low bone mineral density                      | 0<br>(0-0)              |
| Dietary risk factors and physical inactivity  |                         |                         |                         |                         |                         |                         |                         |
| Diet low in fruits                            | 0<br>(0-0)              | 0<br>(0-0)              | 1,256<br>(1,082-1,440)  | 1,715<br>(1,508-1,926)  | 2,404<br>(2,121-2,751)  | 3,175<br>(2,829-3,639)  | 3,947<br>(3,502-4,469)  |
| Diet low in vegetables                        | 0<br>(0-0)              | 0<br>(0-0)              | 664<br>(512-824)        | 872<br>(670-1,062)      | 1,225<br>(957-1,544)    | 1,652<br>(1,260-2,063)  | 2,100<br>(1,627-2,599)  |
| Diet low in whole grains                      | 0<br>(0-0)              | 0<br>(0-0)              | 324<br>(197-449)        | 404<br>(256-547)        | 519<br>(312-727)        | 659<br>(387-935)        | 796<br>(459-1,120)      |
| Diet low in nuts and seeds                    | 0<br>(0-0)              | 0<br>(0-0)              | 329<br>(256-406)        | 425<br>(332-521)        | 562<br>(438-693)        | 703<br>(559-867)        | 816<br>(633-1,007)      |
| Diet low in milk                              | 0<br>(0-0)              | 0<br>(0-0)              | 318<br>(211-403)        | 422<br>(281-551)        | 527<br>(352-678)        | 666<br>(437-873)        | 785<br>(520-1,005)      |
| Diet high in red meat                         | 0<br>(0-0)              | 0<br>(0-0)              | 16<br>(5-29)            | 24<br>(7-42)            | 35<br>(10-60)           | 42<br>(11-72)           | 51<br>(14-89)           |
| Diet high in processed meat                   | 0<br>(0-0)              | 0<br>(0-0)              | 17<br>(7-31)            | 27<br>(11-46)           | 39<br>(16-66)           | 46<br>(19-77)           | 49<br>(21-81)           |
| Diet high in sugar-sweetened beverages        | 0<br>(0-0)              | 0<br>(0-0)              | 154<br>(63-253)         | 219<br>(93-348)         | 280<br>(124-431)        | 359<br>(152-576)        | 407<br>(163-647)        |
| Diet low in fibre                             | 0<br>(0-0)              | 0<br>(0-0)              | 59<br>(36-84)           | 70<br>(44-99)           | 95<br>(33-171)          | 114<br>(36-203)         | 118<br>(40-239)         |
| Diet low in calcium                           | 0<br>(0-0)              | 0<br>(0-0)              | 135<br>(62-206)         | 176<br>(83-266)         | 227<br>(106-347)        | 265<br>(127-408)        | 296<br>(136-455)        |
| Diet low in seafood omega-3 fatty acids       | 0<br>(0-0)              | 0<br>(0-0)              | 20<br>(12-29)           | 30<br>(17-40)           | 43<br>(26-57)           | 49<br>(32-65)           | 58<br>(39-77)           |
| Diet low in polyunsaturated fatty acids       | 0<br>(0-0)              | 0<br>(0-0)              | 188<br>(137-240)        | 244<br>(177-316)        | 295<br>(216-385)        | 374<br>(267-490)        | 433<br>(307-569)        |
| Diet high in trans fatty acids                | 0<br>(0-0)              | 0<br>(0-0)              | 89<br>(42-137)          | 116<br>(57-178)         | 143<br>(69-219)         | 176<br>(86-272)         | 204<br>(99-313)         |
| Diet high in sodium                           | 0<br>(0-0)              | 0<br>(0-0)              | 74<br>(52-99)           | 98<br>(69-129)          | 122<br>(86-163)         | 156<br>(112-208)        | 184<br>(132-243)        |
| Physical inactivity and low physical activity | 925<br>(671-1,258)      | 1,106<br>(808-1,480)    | 1,216<br>(895-1,604)    | 1,274<br>(945-1,689)    | 1,374<br>(1,019-1,811)  | 1,265<br>(936-1,662)    | 1,209<br>(889-1,587)    |
| Occupational risk factors                     | 6<br>(3-9)              | 8<br>(5-12)             | 9<br>(6-15)             | 11<br>(7-17)            | 17<br>(11-26)           | 22<br>(14-33)           | 33<br>(21-52)           |
| Occupational carcinogens                      |                         |                         |                         |                         |                         |                         |                         |

**Web table 4: Global DALYs (in thousands) attributable to risk factors by age and sex in 1990**

| Risk                                                      | Females,<br>15-19 Years | Females,<br>20-24 Years | Females,<br>25-29 Years | Females,<br>30-34 Years | Females,<br>35-39 Years | Females,<br>40-44 Years | Females,<br>45-49 Years |
|-----------------------------------------------------------|-------------------------|-------------------------|-------------------------|-------------------------|-------------------------|-------------------------|-------------------------|
| Occupational exposure to asbestos                         | 2<br>(1-4)              | 2<br>(1-3)              | 2<br>(1-3)              | 3<br>(2-5)              | 4<br>(2-7)              | 6<br>(4-10)             | 8<br>(5-13)             |
| Occupational exposure to arsenic                          | 0<br>(0-0)              | 0<br>(0-0)              | 0<br>(0-0)              | 0<br>(0-0)              | 0<br>(0-1)              | 1<br>(0-1)              | 1<br>(0-2)              |
| Occupational exposure to benzene                          | 3<br>(1-6)              | 5<br>(2-9)              | 5<br>(2-9)              | 4<br>(2-8)              | 2<br>(1-4)              | 2<br>(1-3)              | 1<br>(0-2)              |
| Occupational exposure to beryllium                        | 0<br>(0-0)              |
| Occupational exposure to cadmium                          | 0<br>(0-0)              | 0<br>(0-0)              | 0<br>(0-0)              | 0<br>(0-0)              | 0<br>(0-0)              | 0<br>(0-0)              | 1<br>(0-0)              |
| Occupational exposure to chromium                         | 0<br>(0-0)              | 0<br>(0-0)              | 0<br>(0-0)              | 0<br>(0-0)              | 0<br>(0-1)              | 0<br>(0-1)              | 1<br>(0-1)              |
| Occupational exposure to diesel engine exhaust            | 0<br>(0-0)              | 0<br>(0-0)              | 0<br>(0-1)              | 1<br>(0-1)              | 2<br>(1-4)              | 3<br>(1-5)              | 5<br>(3-9)              |
| Occupational exposure to second-hand smoke                | 0<br>(0-0)              | 0<br>(0-0)              | 1<br>(0-1)              | 1<br>(1-2)              | 4<br>(2-6)              | 5<br>(3-9)              | 10<br>(6-15)            |
| Occupational exposure to formaldehyde                     | 1<br>(0-1)              | 1<br>(0-2)              | 1<br>(0-2)              | 1<br>(0-2)              | 1<br>(0-1)              | 1<br>(0-1)              | 0<br>(0-1)              |
| Occupational exposure to nickel                           | 0<br>(0-0)              | 0<br>(0-0)              | 0<br>(0-1)              | 0<br>(0-1)              | 1<br>(0-3)              | 2<br>(0-5)              | 4<br>(1-8)              |
| Occupational exposure to polycyclic aromatic hydrocarbons | 0<br>(0-0)              | 0<br>(0-0)              | 0<br>(0-0)              | 0<br>(0-0)              | 0<br>(0-1)              | 1<br>(0-1)              | 1<br>(1-2)              |
| Occupational exposure to silica                           | 0<br>(0-0)              | 0<br>(0-0)              | 0<br>(0-0)              | 0<br>(0-1)              | 1<br>(1-2)              | 2<br>(1-3)              | 3<br>(2-5)              |
| Occupational exposure to sulfuric acid                    | 0<br>(0-0)              | 0<br>(0-0)              | 0<br>(0-0)              | 0<br>(0-0)              | 0<br>(0-1)              | 0<br>(0-1)              | 0<br>(0-1)              |
| Occupational asthmagens                                   | 81<br>(41-134)          | 74<br>(41-118)          | 60<br>(34-96)           | 53<br>(30-84)           | 59<br>(33-97)           | 55<br>(32-93)           | 58<br>(31-97)           |
| Occupational particulate matter, gases, and fumes         | 0<br>(0-0)              | 0<br>(0-0)              | 144<br>(62-237)         | 167<br>(75-272)         | 229<br>(105-373)        | 240<br>(113-380)        | 281<br>(129-448)        |
| Occupational noise                                        | 58<br>(30-104)          | 78<br>(41-135)          | 96<br>(53-161)          | 117<br>(65-195)         | 105<br>(61-172)         | 102<br>(59-163)         | 95<br>(56-150)          |
| Occupational risk factors for injuries                    | 167<br>(123-229)        | 206<br>(151-285)        | 178<br>(134-239)        | 151<br>(116-202)        | 130<br>(95-187)         | 93<br>(72-124)          | 67<br>(52-89)           |
| Occupational low back pain                                | 613<br>(387-896)        | 740<br>(472-1,060)      | 729<br>(464-1,046)      | 776<br>(504-1,101)      | 833<br>(543-1,186)      | 753<br>(496-1,073)      | 674<br>(442-958)        |
| Sexual abuse and violence                                 |                         |                         |                         |                         |                         |                         |                         |
| Childhood sexual abuse                                    |                         |                         |                         |                         |                         |                         |                         |
| Intimate partner violence                                 |                         |                         |                         |                         |                         |                         |                         |

**Web table 4: Global DALYs (in thousands) attributable to risk factors by age and sex in 1990**

| Risk                                         | Females,<br>50-54 Years | Females,<br>55-59 Years | Females,<br>60-64 Years | Females,<br>65-69 Years | Females,<br>70-74 Years | Females,<br>75-79 Years | Females,<br>80+ Years  |
|----------------------------------------------|-------------------------|-------------------------|-------------------------|-------------------------|-------------------------|-------------------------|------------------------|
| Unimproved water and sanitation              | 223<br>(11-426)         | 237<br>(11-461)         | 268<br>(12-527)         | 224<br>(11-442)         | 174<br>(8-335)          | 116<br>(5-220)          | 95<br>(5-182)          |
| Unimproved water source                      | 88<br>(6-180)           | 90<br>(6-186)           | 103<br>(7-223)          | 87<br>(6-182)           | 69<br>(5-142)           | 46<br>(3-95)            | 37<br>(2-75)           |
| Unimproved sanitation                        | 156<br>(5-310)          | 169<br>(5-339)          | 190<br>(5-383)          | 158<br>(5-321)          | 122<br>(4-245)          | 81<br>(2-159)           | 67<br>(2-131)          |
| Air pollution                                |                         |                         |                         |                         |                         |                         |                        |
| Ambient particulate matter pollution         | 1,984<br>(1,436-2,517)  | 2,326<br>(1,643-3,012)  | 2,977<br>(2,176-3,789)  | 3,113<br>(2,148-4,072)  | 2,888<br>(2,003-3,735)  | 2,649<br>(1,838-3,359)  | 2,745<br>(1,957-3,467) |
| Household air pollution from solid fuels     | 3,370<br>(2,656-4,135)  | 4,024<br>(3,093-4,945)  | 5,058<br>(3,969-6,261)  | 5,210<br>(3,993-6,378)  | 4,900<br>(3,784-6,012)  | 3,834<br>(2,995-4,734)  | 3,367<br>(2,615-4,173) |
| Ambient ozone pollution                      | 74<br>(23-129)          | 111<br>(36-197)         | 164<br>(54-291)         | 183<br>(59-321)         | 182<br>(61-319)         | 146<br>(48-257)         | 143<br>(45-256)        |
| Other environmental risks                    | 230<br>(185-284)        | 253<br>(206-310)        | 308<br>(250-376)        | 302<br>(249-363)        | 242<br>(200-292)        | 187<br>(156-221)        | 132<br>(108-157)       |
| Residential radon                            |                         |                         |                         |                         |                         |                         |                        |
| Lead exposure                                | 230<br>(185-284)        | 253<br>(206-310)        | 308<br>(250-376)        | 302<br>(249-363)        | 242<br>(200-292)        | 187<br>(156-221)        | 132<br>(108-157)       |
| Child and maternal undernutrition            | 653<br>(452-922)        | 504<br>(353-711)        | 423<br>(301-592)        | 308<br>(222-432)        | 233<br>(168-321)        | 188<br>(136-257)        | 173<br>(132-233)       |
| Suboptimal breastfeeding                     | 0<br>(0-0)              | 0<br>(0-0)              | 0<br>(0-0)              | 0<br>(0-0)              | 0<br>(0-0)              | 0<br>(0-0)              | 0<br>(0-0)             |
| Non-exclusive breastfeeding                  | 0<br>(0-0)              | 0<br>(0-0)              | 0<br>(0-0)              | 0<br>(0-0)              | 0<br>(0-0)              | 0<br>(0-0)              | 0<br>(0-0)             |
| Discontinued breastfeeding                   | 0<br>(0-0)              | 0<br>(0-0)              | 0<br>(0-0)              | 0<br>(0-0)              | 0<br>(0-0)              | 0<br>(0-0)              | 0<br>(0-0)             |
| Childhood underweight                        | 0<br>(0-0)              | 0<br>(0-0)              | 0<br>(0-0)              | 0<br>(0-0)              | 0<br>(0-0)              | 0<br>(0-0)              | 0<br>(0-0)             |
| Iron deficiency                              | 653<br>(452-922)        | 504<br>(353-711)        | 423<br>(301-592)        | 308<br>(222-432)        | 233<br>(168-321)        | 188<br>(136-257)        | 173<br>(132-233)       |
| Vitamin A deficiency                         | 0<br>(0-0)              | 0<br>(0-0)              | 0<br>(0-0)              | 0<br>(0-0)              | 0<br>(0-0)              | 0<br>(0-0)              | 0<br>(0-0)             |
| Zinc deficiency                              | 0<br>(0-0)              | 0<br>(0-0)              | 0<br>(0-0)              | 0<br>(0-0)              | 0<br>(0-0)              | 0<br>(0-0)              | 0<br>(0-0)             |
| Tobacco smoking, including second-hand smoke | 3,167<br>(2,274-4,377)  | 4,028<br>(2,974-5,433)  | 4,682<br>(3,481-6,512)  | 4,827<br>(3,575-6,692)  | 4,202<br>(3,082-5,667)  | 3,255<br>(2,535-4,617)  | 2,740<br>(2,229-3,903) |
| Tobacco smoking                              | 2,800<br>(1,896-4,076)  | 3,603<br>(2,544-5,032)  | 4,145<br>(2,955-5,957)  | 4,240<br>(2,971-6,171)  | 3,638<br>(2,502-5,136)  | 2,685<br>(1,952-4,131)  | 2,134<br>(1,632-3,256) |
| Second-hand smoke                            | 367<br>(236-500)        | 425<br>(272-593)        | 537<br>(344-723)        | 588<br>(384-790)        | 564<br>(363-753)        | 571<br>(371-758)        | 605<br>(404-797)       |
| Alcohol and drug use                         | 1,745<br>(1,501-2,033)  | 1,715<br>(1,457-2,009)  | 1,941<br>(1,648-2,283)  | 1,381<br>(1,107-1,692)  | 1,130<br>(873-1,416)    | 1,224<br>(895-1,557)    | 1,266<br>(822-1,718)   |
| Alcohol use                                  | 1,627<br>(1,391-1,907)  | 1,640<br>(1,385-1,932)  | 1,889<br>(1,597-2,232)  | 1,368<br>(1,098-1,679)  | 1,123<br>(865-1,409)    | 1,219<br>(890-1,551)    | 1,262<br>(819-1,710)   |

**Web table 4: Global DALYs (in thousands) attributable to risk factors by age and sex in 1990**

| Risk                                          | Females,<br>50-54 Years | Females,<br>55-59 Years | Females,<br>60-64 Years | Females,<br>65-69 Years | Females,<br>70-74 Years | Females,<br>75-79 Years | Females,<br>80+ Years     |
|-----------------------------------------------|-------------------------|-------------------------|-------------------------|-------------------------|-------------------------|-------------------------|---------------------------|
| Drug use                                      | 131<br>(103-165)        | 91<br>(73-111)          | 71<br>(58-88)           | 13<br>(9-20)            | 7<br>(5-13)             | 5<br>(3-11)             | 4<br>(2-8)                |
| Physiological risk factors                    |                         |                         |                         |                         |                         |                         |                           |
| High fasting plasma glucose                   | 2,292<br>(1,914-2,719)  | 3,023<br>(2,567-3,517)  | 3,601<br>(3,052-4,178)  | 3,747<br>(3,219-4,347)  | 3,170<br>(2,718-3,675)  | 2,834<br>(2,388-3,299)  | 2,518<br>(2,064-2,943)    |
| High total cholesterol                        | 1,174<br>(929-1,465)    | 1,569<br>(1,284-1,931)  | 2,289<br>(1,881-2,751)  | 2,642<br>(2,187-3,149)  | 2,382<br>(1,907-2,925)  | 2,488<br>(1,835-3,179)  | 2,609<br>(2,136-3,131)    |
| High blood pressure                           | 4,298<br>(3,740-4,930)  | 6,009<br>(5,339-6,902)  | 7,722<br>(6,929-8,749)  | 9,411<br>(8,619-10,422) | 8,870<br>(8,066-9,857)  | 9,570<br>(8,826-10,385) | 10,820<br>(10,016-11,698) |
| High body-mass index                          | 2,404<br>(1,861-2,955)  | 2,830<br>(2,267-3,442)  | 3,592<br>(2,912-4,308)  | 3,523<br>(2,881-4,187)  | 2,945<br>(2,404-3,509)  | 2,953<br>(2,407-3,509)  | 2,777<br>(2,193-3,357)    |
| Low bone mineral density                      | 132<br>(93-177)         | 163<br>(118-220)        | 173<br>(132-225)        | 204<br>(157-262)        | 165<br>(127-210)        | 215<br>(170-269)        | 309<br>(243-387)          |
| Dietary risk factors and physical inactivity  | 5,900<br>(5,285-6,597)  | 6,911<br>(6,231-7,897)  | 8,929<br>(8,052-10,040) | 9,822<br>(8,879-10,951) | 9,215<br>(8,325-10,289) | 9,271<br>(8,414-10,158) | 10,063<br>(9,060-11,062)  |
| Diet low in fruits                            | 3,098<br>(2,429-3,812)  | 3,527<br>(2,736-4,338)  | 4,172<br>(3,194-5,142)  | 4,367<br>(3,353-5,388)  | 3,936<br>(2,937-4,865)  | 3,583<br>(2,719-4,409)  | 3,278<br>(2,471-4,102)    |
| Diet low in vegetables                        | 1,151<br>(698-1,618)    | 1,252<br>(769-1,776)    | 1,561<br>(1,010-2,133)  | 1,646<br>(1,080-2,291)  | 1,490<br>(976-2,046)    | 1,498<br>(981-2,019)    | 1,503<br>(965-2,053)      |
| Diet low in whole grains                      | 1,143<br>(894-1,399)    | 1,255<br>(974-1,554)    | 1,536<br>(1,191-1,906)  | 1,571<br>(1,216-1,924)  | 1,402<br>(1,088-1,725)  | 1,346<br>(1,036-1,642)  | 1,281<br>(979-1,559)      |
| Diet low in nuts and seeds                    | 1,216<br>(780-1,593)    | 1,395<br>(889-1,831)    | 1,917<br>(1,217-2,523)  | 2,123<br>(1,335-2,775)  | 1,943<br>(1,202-2,574)  | 2,017<br>(1,242-2,689)  | 2,279<br>(1,371-3,062)    |
| Diet low in milk                              | 72<br>(21-124)          | 83<br>(25-141)          | 96<br>(28-166)          | 93<br>(28-161)          | 76<br>(23-130)          | 67<br>(19-116)          | 54<br>(16-93)             |
| Diet high in red meat                         | 61<br>(28-101)          | 64<br>(30-106)          | 70<br>(32-111)          | 65<br>(30-102)          | 49<br>(22-76)           | 44<br>(20-69)           | 36<br>(16-57)             |
| Diet high in processed meat                   | 574<br>(209-912)        | 636<br>(228-1,013)      | 833<br>(261-1,353)      | 888<br>(260-1,470)      | 768<br>(214-1,293)      | 826<br>(213-1,385)      | 938<br>(228-1,632)        |
| Diet high in sugar-sweetened beverages        | 157<br>(49-307)         | 153<br>(72-312)         | 168<br>(79-337)         | 158<br>(90-306)         | 136<br>(74-283)         | 128<br>(58-230)         | 151<br>(53-224)           |
| Diet low in fibre                             | 419<br>(191-645)        | 464<br>(215-714)        | 579<br>(261-911)        | 601<br>(270-942)        | 552<br>(243-868)        | 551<br>(246-877)        | 596<br>(252-966)          |
| Diet low in calcium                           | 80<br>(54-104)          | 90<br>(62-118)          | 102<br>(69-137)         | 95<br>(65-126)          | 77<br>(54-103)          | 63<br>(44-84)           | 46<br>(32-62)             |
| Diet low in seafood omega-3 fatty acids       | 668<br>(482-876)        | 741<br>(534-987)        | 1,014<br>(737-1,323)    | 1,102<br>(796-1,427)    | 990<br>(713-1,284)      | 1,000<br>(721-1,273)    | 1,070<br>(764-1,374)      |
| Diet low in polyunsaturated fatty acids       | 307<br>(147-477)        | 346<br>(167-532)        | 462<br>(217-721)        | 498<br>(238-765)        | 446<br>(212-690)        | 452<br>(216-696)        | 489<br>(231-756)          |
| Diet high in trans fatty acids                | 257<br>(183-338)        | 292<br>(212-385)        | 379<br>(270-492)        | 412<br>(296-529)        | 371<br>(262-477)        | 350<br>(247-449)        | 391<br>(278-503)          |
| Diet high in sodium                           | 1,559<br>(1,024-2,073)  | 1,900<br>(1,230-2,552)  | 2,521<br>(1,610-3,399)  | 2,826<br>(1,800-3,788)  | 2,573<br>(1,648-3,487)  | 2,421<br>(1,517-3,268)  | 2,394<br>(1,492-3,260)    |
| Physical inactivity and low physical activity |                         |                         |                         |                         |                         |                         |                           |

**Web table 4: Global DALYs (in thousands) attributable to risk factors by age and sex in 1990**

| Risk                                                      | Females,<br>50-54 Years | Females,<br>55-59 Years | Females,<br>60-64 Years | Females,<br>65-69 Years | Females,<br>70-74 Years | Females,<br>75-79 Years | Females,<br>80+ Years |
|-----------------------------------------------------------|-------------------------|-------------------------|-------------------------|-------------------------|-------------------------|-------------------------|-----------------------|
| Occupational risk factors                                 | 1,265<br>(921-1,655)    | 1,118<br>(783-1,473)    | 941<br>(650-1,261)      | 427<br>(288-582)        | 367<br>(239-509)        | 252<br>(160-356)        | 15<br>(11-22)         |
| Occupational carcinogens                                  | 48<br>(31-75)           | 66<br>(42-105)          | 72<br>(47-114)          | 48<br>(32-73)           | 37<br>(25-58)           | 20<br>(15-29)           | 15<br>(11-22)         |
| Occupational exposure to asbestos                         | 11<br>(7-17)            | 14<br>(8-21)            | 16<br>(11-26)           | 18<br>(12-28)           | 14<br>(9-21)            | 12<br>(8-19)            | 10<br>(7-16)          |
| Occupational exposure to arsenic                          | 2<br>(1-3)              | 2<br>(1-5)              | 3<br>(1-5)              | 1<br>(1-3)              | 1<br>(0-2)              | 0<br>(0-1)              | 0<br>(0-0)            |
| Occupational exposure to benzene                          | 1<br>(0-2)              | 1<br>(0-2)              | 1<br>(0-2)              | 1<br>(1-3)              | 1<br>(0-2)              | 1<br>(0-2)              | 1<br>(0-1)            |
| Occupational exposure to beryllium                        | 0<br>(0-0)              | 0<br>(0-0)              | 0<br>(0-0)              | 0<br>(0-0)              | 0<br>(0-0)              | 0<br>(0-0)              | 0<br>(0-0)            |
| Occupational exposure to cadmium                          | 0<br>(0-0)              | 0<br>(0-1)              | 0<br>(0-1)              | 0<br>(0-0)              | 0<br>(0-0)              | 0<br>(0-0)              | 0<br>(0-0)            |
| Occupational exposure to chromium                         | 1<br>(1-2)              | 2<br>(1-3)              | 2<br>(1-3)              | 1<br>(0-1)              | 1<br>(0-1)              | 0<br>(0-0)              | 0<br>(0-0)            |
| Occupational exposure to diesel engine exhaust            | 8<br>(4-13)             | 11<br>(6-19)            | 11<br>(6-20)            | 6<br>(3-10)             | 5<br>(3-8)              | 1<br>(1-2)              | 1<br>(0-2)            |
| Occupational exposure to second-hand smoke                | 14<br>(9-23)            | 20<br>(13-33)           | 21<br>(13-36)           | 11<br>(7-18)            | 9<br>(5-16)             | 3<br>(2-5)              | 2<br>(1-3)            |
| Occupational exposure to formaldehyde                     | 0<br>(0-1)              | 0<br>(0-1)              | 0<br>(0-1)              | 0<br>(0-1)              | 0<br>(0-0)              | 0<br>(0-0)              | 0<br>(0-0)            |
| Occupational exposure to nickel                           | 5<br>(1-11)             | 8<br>(2-16)             | 8<br>(2-17)             | 4<br>(1-9)              | 3<br>(1-7)              | 1<br>(0-2)              | 1<br>(0-1)            |
| Occupational exposure to polycyclic aromatic hydrocarbons | 2<br>(1-3)              | 3<br>(1-5)              | 3<br>(1-5)              | 1<br>(1-3)              | 1<br>(0-2)              | 0<br>(0-1)              | 0<br>(0-0)            |
| Occupational exposure to silica                           | 4<br>(3-7)              | 6<br>(4-11)             | 7<br>(4-12)             | 3<br>(2-6)              | 3<br>(2-5)              | 1<br>(0-1)              | 1<br>(0-1)            |
| Occupational exposure to sulfuric acid                    | 1<br>(0-2)              | 1<br>(0-2)              | 1<br>(0-3)              | 1<br>(0-1)              | 0<br>(0-1)              | 0<br>(0-0)              | 0<br>(0-0)            |
| Occupational asthmagens                                   | 60<br>(33-102)          | 57<br>(29-99)           | 49<br>(24-91)           | 23<br>(11-38)           | 19<br>(9-33)            | 13<br>(7-24)            | 0<br>(0-0)            |
| Occupational particulate matter, gases, and fumes         | 365<br>(161-585)        | 404<br>(177-655)        | 405<br>(179-674)        | 190<br>(78-319)         | 182<br>(75-311)         | 138<br>(57-234)         | 0<br>(0-0)            |
| Occupational noise                                        | 109<br>(64-170)         | 66<br>(37-106)          | 63<br>(35-100)          | 20<br>(11-33)           | 19<br>(11-32)           | 4<br>(2-8)              | 0<br>(0-0)            |
| Occupational risk factors for injuries                    | 50<br>(39-67)           | 28<br>(22-38)           | 14<br>(11-18)           | 4<br>(3-5)              | 2<br>(2-3)              | 1<br>(0-1)              | 0<br>(0-0)            |
| Occupational low back pain                                | 634<br>(417-896)        | 496<br>(321-704)        | 338<br>(213-493)        | 143<br>(87-215)         | 107<br>(66-162)         | 76<br>(47-114)          | 0<br>(0-0)            |
| Sexual abuse and violence                                 |                         |                         |                         |                         |                         |                         |                       |
| Childhood sexual abuse                                    |                         |                         |                         |                         |                         |                         |                       |
| Intimate partner violence                                 |                         |                         |                         |                         |                         |                         |                       |

0 indicates zero deaths attributable; blank cells indicate that attributable deaths were not quantified
